# Supplementary material for: Catalytic diastereo- and enantioselective additions of versatile allyl groups to N–H ketimines
Source: Springer Nature journal article supplement (doi:10.1038/nchem.2816), 2017-07-17
Supplement: 41557_2017_BFnchem2816_MOESM80_ESM.cif [file 41557_2017_BFnchem2816_MOESM80_ESM.cif]

 
data_C29H50BNO4Si 
 
_audit_creation_method            'SHELXL-2014/7'
_shelx_SHELXL_version_number      '2014/7'
_chemical_name_systematic         ?
_chemical_name_common             ?
_chemical_melting_point           ?
_chemical_formula_moiety          'C29 H50 B N O4 Si' 
_chemical_formula_sum
 'C29 H50 B N O4 Si' 
_chemical_formula_weight          515.60

loop_
 _atom_type_symbol
 _atom_type_description
 _atom_type_scat_dispersion_real
 _atom_type_scat_dispersion_imag
 _atom_type_scat_source
 'C'  'C'   0.0181   0.0091
 'International Tables Vol C Tables 4.2.6.8 and 6.1.1.4'
 'H'  'H'   0.0000   0.0000
 'International Tables Vol C Tables 4.2.6.8 and 6.1.1.4'
 'B'  'B'   0.0090   0.0039
 'International Tables Vol C Tables 4.2.6.8 and 6.1.1.4'
 'O'  'O'   0.0492   0.0322
 'International Tables Vol C Tables 4.2.6.8 and 6.1.1.4'
 'Si'  'Si'   0.2541   0.3302
 'International Tables Vol C Tables 4.2.6.8 and 6.1.1.4'
 'N'  'N'   0.0311   0.0180
 'International Tables Vol C Tables 4.2.6.8 and 6.1.1.4'
 
_space_group_crystal_system       orthorhombic
_space_group_IT_number            19
_space_group_name_H-M_alt         'P 21 21 21'
_space_group_name_Hall            'P 2ac 2ab'
 
_shelx_space_group_comment
;
The symmetry employed for this shelxl refinement is uniquely defined
by the following loop, which should always be used as a source of
symmetry information in preference to the above space-group names.
They are only intended as comments.
;
 
loop_
 _space_group_symop_operation_xyz
 'x, y, z'
 '-x+1/2, -y, z+1/2'
 '-x, y+1/2, -z+1/2'
 'x+1/2, -y+1/2, -z'
 
_cell_length_a                    10.5698(4)
_cell_length_b                    19.1960(7)
_cell_length_c                    30.7942(10)
_cell_angle_alpha                 90
_cell_angle_beta                  90
_cell_angle_gamma                 90
_cell_volume                      6248.1(4)
_cell_formula_units_Z             8
_cell_measurement_temperature     100(2)
_cell_measurement_reflns_used     9862
_cell_measurement_theta_min       2.71
_cell_measurement_theta_max       66.67
 
_exptl_crystal_description        block
_exptl_crystal_colour             colorless
_exptl_crystal_density_meas       'not measured' 
_exptl_crystal_density_method     none
_exptl_crystal_density_diffrn     1.096          
_exptl_crystal_F_000              2256
_exptl_transmission_factor_min    ?
_exptl_transmission_factor_max    ?
_exptl_crystal_size_max           0.380
_exptl_crystal_size_mid           0.120
_exptl_crystal_size_min           0.080
_exptl_absorpt_coefficient_mu     0.901
_shelx_estimated_absorpt_T_min    0.726
_shelx_estimated_absorpt_T_max    0.931
_exptl_absorpt_correction_type    'multi-scan' 
_exptl_absorpt_correction_T_min   0.6278
_exptl_absorpt_correction_T_max   0.7528
_exptl_absorpt_process_details
;
Sheldrick, G.M. (2013). SADABS. Bruker AXS Inc. Madison, WI USA.
;
_exptl_absorpt_special_details    ?
_diffrn_ambient_temperature       100(2)
_diffrn_radiation_wavelength      1.54178
_diffrn_radiation_type            CuK\a
_diffrn_source                    'microfocus sealed tube'
_diffrn_source_type               'Incoatec I\uS'
_diffrn_radiation_monochromator   mirrors 
_diffrn_measurement_device_type   'Bruker Kappa DUO CCD diffractometer'
_diffrn_measurement_method        '\f and \w scans'  
_diffrn_detector_area_resol_mean  ?
_diffrn_reflns_number             43796
_diffrn_reflns_av_unetI/netI      0.0757
_diffrn_reflns_av_R_equivalents   0.0817
_diffrn_reflns_limit_h_min        -10
_diffrn_reflns_limit_h_max        12
_diffrn_reflns_limit_k_min        -22
_diffrn_reflns_limit_k_max        20
_diffrn_reflns_limit_l_min        -36
_diffrn_reflns_limit_l_max        33
_diffrn_reflns_theta_min          2.712
_diffrn_reflns_theta_max          66.760
_diffrn_reflns_theta_full         66.760
_diffrn_measured_fraction_theta_max   0.985
_diffrn_measured_fraction_theta_full  0.985
_diffrn_reflns_Laue_measured_fraction_max    0.985
_diffrn_reflns_Laue_measured_fraction_full   0.985
_diffrn_reflns_point_group_measured_fraction_max   0.973
_diffrn_reflns_point_group_measured_fraction_full  0.973
_reflns_number_total              10770
_reflns_number_gt                 8231
_reflns_threshold_expression      'I > 2\s(I)'
_reflns_Friedel_coverage          0.780
_reflns_Friedel_fraction_max      0.957
_reflns_Friedel_fraction_full     0.957
 
_reflns_special_details
;
 Reflections were merged by SHELXL according to the crystal
 class for the calculation of statistics and refinement.
 
 _reflns_Friedel_fraction is defined as the number of unique
 Friedel pairs measured divided by the number that would be
 possible theoretically, ignoring centric projections and
 systematic absences.
;
 
_computing_data_collection        'APEX2 (Bruker, 2014)'
_computing_cell_refinement        'SAINT (Bruker, 2014)'
_computing_data_reduction         'SAINT (Bruker, 2014)'
_computing_structure_solution     'SHELXL-2014 (Sheldrick, 2014)'
_computing_structure_refinement   'SHELXL-2014 (Sheldrick, 2014)'
_computing_molecular_graphics     'Bruker SHELXTL'
_computing_publication_material   'Bruker SHELXTL'
_refine_special_details           ?
_refine_ls_structure_factor_coef  Fsqd
_refine_ls_matrix_type            full
_refine_ls_weighting_scheme       calc
_refine_ls_weighting_details
'w=1/[\s^2^(Fo^2^)+(0.0483P)^2^+1.7136P] where P=(Fo^2^+2Fc^2^)/3'
_atom_sites_solution_primary      dual
_atom_sites_solution_secondary    difmap
_atom_sites_solution_hydrogens    mixed
_refine_ls_hydrogen_treatment     mixed
_refine_ls_extinction_method      none
_refine_ls_extinction_coef        .
_refine_ls_abs_structure_details
;
 Flack x determined using 2738 quotients [(I+)-(I-)]/[(I+)+(I-)]
 (Parsons, Flack and Wagner, Acta Cryst. B69 (2013) 249-259).
;
_refine_ls_abs_structure_Flack    0.001(19)
_chemical_absolute_configuration  ad
_refine_ls_number_reflns          10770
_refine_ls_number_parameters      681
_refine_ls_number_restraints      2
_refine_ls_R_factor_all           0.0776
_refine_ls_R_factor_gt            0.0489
_refine_ls_wR_factor_ref          0.1228
_refine_ls_wR_factor_gt           0.1008
_refine_ls_goodness_of_fit_ref    1.052
_refine_ls_restrained_S_all       1.052
_refine_ls_shift/su_max           0.001
_refine_ls_shift/su_mean          0.000
 
loop_
 _atom_site_label
 _atom_site_type_symbol
 _atom_site_fract_x
 _atom_site_fract_y
 _atom_site_fract_z
 _atom_site_U_iso_or_equiv
 _atom_site_adp_type
 _atom_site_occupancy
 _atom_site_site_symmetry_order  
 _atom_site_calc_flag
 _atom_site_refinement_flags_posn
 _atom_site_refinement_flags_adp
 _atom_site_refinement_flags_occupancy
 _atom_site_disorder_assembly
 _atom_site_disorder_group
Si1 Si 0.71828(12) 0.69555(6) 0.61429(4) 0.0203(3) Uani 1 1 d . . . . .
O1 O 0.7048(3) 0.61023(15) 0.61653(9) 0.0208(6) Uani 1 1 d . . . . .
O2 O 0.6449(3) 0.33717(17) 0.63703(10) 0.0294(8) Uani 1 1 d . . . . .
N1 N 0.8456(4) 0.34817(19) 0.61085(12) 0.0237(9) Uani 1 1 d D . . . .
H1N H 0.927(3) 0.334(2) 0.6156(15) 0.031(14) Uiso 1 1 d D . . . .
O3 O 1.1948(3) 0.51636(15) 0.64451(10) 0.0236(7) Uani 1 1 d . . . . .
O4 O 1.0708(3) 0.58143(15) 0.59903(9) 0.0212(7) Uani 1 1 d . . . . .
B1 B 1.0771(5) 0.5259(3) 0.62731(15) 0.0202(11) Uani 1 1 d . . . . .
C1 C 0.7261(6) 0.7959(3) 0.54855(15) 0.0458(15) Uani 1 1 d . . . . .
H1A H 0.7205 0.8075 0.5176 0.069 Uiso 1 1 calc R U . . .
H1B H 0.8079 0.8114 0.5600 0.069 Uiso 1 1 calc R U . . .
H1C H 0.6578 0.8194 0.5643 0.069 Uiso 1 1 calc R U . . .
C2 C 0.7135(5) 0.7160(2) 0.55448(13) 0.0254(10) Uani 1 1 d . . . . .
C3 C 0.7215(4) 0.5684(2) 0.65480(13) 0.0202(9) Uani 1 1 d . . . . .
H3A H 0.6508 0.5765 0.6752 0.024 Uiso 1 1 calc R U . . .
H3B H 0.8014 0.5813 0.6695 0.024 Uiso 1 1 calc R U . . .
C4 C 0.7253(4) 0.4921(2) 0.64167(13) 0.0176(9) Uani 1 1 d . . . . .
H4A H 0.6475 0.4801 0.6254 0.021 Uiso 1 1 calc R U . . .
H4B H 0.7288 0.4625 0.6680 0.021 Uiso 1 1 calc R U . . .
C5 C 0.8431(4) 0.4782(2) 0.61293(13) 0.0186(9) Uani 1 1 d . . . . .
H5 H 0.8496 0.5186 0.5925 0.022 Uiso 1 1 calc R U . . .
C6 C 0.8349(4) 0.4112(2) 0.58378(13) 0.0191(9) Uani 1 1 d . . . . .
C7 C 0.7159(4) 0.4083(2) 0.55569(12) 0.0196(9) Uani 1 1 d . . . . .
C8 C 0.6729(5) 0.3443(2) 0.53957(14) 0.0257(11) Uani 1 1 d . . . . .
H8 H 0.7152 0.3027 0.5477 0.031 Uiso 1 1 calc R U . . .
C9 C 0.5693(5) 0.3407(3) 0.51180(14) 0.0303(12) Uani 1 1 d . . . . .
H9 H 0.5415 0.2967 0.5014 0.036 Uiso 1 1 calc R U . . .
C10 C 0.5064(4) 0.4006(3) 0.49913(13) 0.0260(11) Uani 1 1 d . . . . .
H10 H 0.4356 0.3980 0.4802 0.031 Uiso 1 1 calc R U . . .
C11 C 0.5482(4) 0.4647(2) 0.51447(14) 0.0241(10) Uani 1 1 d . . . . .
H11 H 0.5055 0.5062 0.5062 0.029 Uiso 1 1 calc R U . . .
C12 C 0.6529(4) 0.4680(2) 0.54199(13) 0.0219(10) Uani 1 1 d . . . . .
H12 H 0.6821 0.5122 0.5516 0.026 Uiso 1 1 calc R U . . .
C13 C 0.5883(5) 0.6924(3) 0.53469(15) 0.0369(13) Uani 1 1 d . . . . .
H13A H 0.5876 0.7034 0.5036 0.055 Uiso 1 1 calc R U . . .
H13B H 0.5183 0.7167 0.5491 0.055 Uiso 1 1 calc R U . . .
H13C H 0.5786 0.6420 0.5387 0.055 Uiso 1 1 calc R U . . .
C14 C 0.8223(5) 0.6795(3) 0.53087(15) 0.0408(14) Uani 1 1 d . . . . .
H14A H 0.8135 0.6290 0.5341 0.061 Uiso 1 1 calc R U . . .
H14B H 0.9031 0.6945 0.5434 0.061 Uiso 1 1 calc R U . . .
H14C H 0.8200 0.6917 0.5000 0.061 Uiso 1 1 calc R U . . .
C15 C 0.5826(5) 0.7374(2) 0.64344(15) 0.0275(11) Uani 1 1 d . . . . .
H15A H 0.5037 0.7271 0.6280 0.041 Uiso 1 1 calc R U . . .
H15B H 0.5956 0.7879 0.6445 0.041 Uiso 1 1 calc R U . . .
H15C H 0.5777 0.7190 0.6731 0.041 Uiso 1 1 calc R U . . .
C16 C 0.8689(5) 0.7241(3) 0.63952(17) 0.0353(13) Uani 1 1 d . . . . .
H16A H 0.8639 0.7179 0.6711 0.053 Uiso 1 1 calc R U . . .
H16B H 0.8835 0.7733 0.6329 0.053 Uiso 1 1 calc R U . . .
H16C H 0.9388 0.6961 0.6280 0.053 Uiso 1 1 calc R U . . .
C17 C 0.9641(4) 0.4788(2) 0.63998(13) 0.0181(9) Uani 1 1 d . . . . .
C18 C 0.9770(5) 0.4417(2) 0.67626(13) 0.0259(11) Uani 1 1 d . . . . .
H18A H 0.9092 0.4134 0.6862 0.031 Uiso 1 1 calc R U . . .
H18B H 1.0539 0.4435 0.6922 0.031 Uiso 1 1 calc R U . . .
C19 C 1.2697(4) 0.5779(2) 0.63299(14) 0.0252(10) Uani 1 1 d . . . . .
C20 C 1.2012(4) 0.6043(2) 0.59185(14) 0.0234(10) Uani 1 1 d . . . . .
C21 C 1.2007(5) 0.6833(2) 0.58597(15) 0.0286(11) Uani 1 1 d . . . . .
H21A H 1.1501 0.6954 0.5604 0.043 Uiso 1 1 calc R U . . .
H21B H 1.2876 0.6999 0.5820 0.043 Uiso 1 1 calc R U . . .
H21C H 1.1639 0.7053 0.6118 0.043 Uiso 1 1 calc R U . . .
C22 C 1.2456(5) 0.5694(2) 0.55000(14) 0.0289(11) Uani 1 1 d . . . . .
H22A H 1.2452 0.5187 0.5538 0.043 Uiso 1 1 calc R U . . .
H22B H 1.3316 0.5850 0.5431 0.043 Uiso 1 1 calc R U . . .
H22C H 1.1886 0.5821 0.5262 0.043 Uiso 1 1 calc R U . . .
C23 C 1.2590(5) 0.6273(2) 0.67132(14) 0.0327(12) Uani 1 1 d . . . . .
H23A H 1.1704 0.6411 0.6751 0.049 Uiso 1 1 calc R U . . .
H23B H 1.3107 0.6687 0.6659 0.049 Uiso 1 1 calc R U . . .
H23C H 1.2889 0.6038 0.6977 0.049 Uiso 1 1 calc R U . . .
C24 C 1.4062(4) 0.5552(3) 0.62646(18) 0.0353(13) Uani 1 1 d . . . . .
H24A H 1.4401 0.5373 0.6539 0.053 Uiso 1 1 calc R U . . .
H24B H 1.4568 0.5952 0.6169 0.053 Uiso 1 1 calc R U . . .
H24C H 1.4097 0.5186 0.6043 0.053 Uiso 1 1 calc R U . . .
C25 C 0.9543(4) 0.4097(2) 0.55325(13) 0.0237(10) Uani 1 1 d . . . . .
H25 H 1.0300 0.4155 0.5724 0.028 Uiso 1 1 calc R U . . .
C26 C 0.9575(5) 0.4697(3) 0.52034(14) 0.0275(11) Uani 1 1 d . . . . .
H26A H 1.0345 0.4662 0.5027 0.041 Uiso 1 1 calc R U . . .
H26B H 0.9570 0.5142 0.5358 0.041 Uiso 1 1 calc R U . . .
H26C H 0.8832 0.4668 0.5014 0.041 Uiso 1 1 calc R U . . .
C27 C 0.9725(5) 0.3411(3) 0.52861(15) 0.0350(13) Uani 1 1 d . . . . .
H27A H 0.9026 0.3347 0.5081 0.052 Uiso 1 1 calc R U . . .
H27B H 0.9737 0.3023 0.5493 0.052 Uiso 1 1 calc R U . . .
H27C H 1.0527 0.3424 0.5127 0.052 Uiso 1 1 calc R U . . .
C28 C 0.7566(5) 0.3182(2) 0.63563(13) 0.0238(10) Uani 1 1 d . . . . .
C29 C 0.8025(5) 0.2559(2) 0.66124(16) 0.0335(12) Uani 1 1 d . . . . .
H29A H 0.7709 0.2589 0.6911 0.050 Uiso 1 1 calc R U . . .
H29B H 0.8952 0.2554 0.6615 0.050 Uiso 1 1 calc R U . . .
H29C H 0.7712 0.2131 0.6477 0.050 Uiso 1 1 calc R U . . .
Si2 Si 0.24016(12) -0.07006(6) 0.62270(4) 0.0195(3) Uani 1 1 d . . . . .
O5 O 0.2263(3) 0.01484(14) 0.62581(8) 0.0198(6) Uani 1 1 d . . . . .
O6 O 0.1494(3) 0.28784(16) 0.61855(10) 0.0283(7) Uani 1 1 d . . . . .
N2 N 0.3510(4) 0.27680(19) 0.64484(12) 0.0215(8) Uani 1 1 d D . . . .
H2N H 0.433(3) 0.290(3) 0.6421(15) 0.033(14) Uiso 1 1 d D . . . .
O7 O 0.7112(3) 0.10272(15) 0.60963(9) 0.0234(7) Uani 1 1 d . . . . .
O8 O 0.5837(3) 0.03932(16) 0.65486(9) 0.0223(7) Uani 1 1 d . . . . .
B2 B 0.5944(5) 0.0958(3) 0.62747(15) 0.0209(11) Uani 1 1 d . . . . .
C30 C 0.2312(5) -0.1781(2) 0.68471(15) 0.0314(12) Uani 1 1 d . . . . .
H30A H 0.3068 -0.1973 0.6707 0.047 Uiso 1 1 calc R U . . .
H30B H 0.1554 -0.1960 0.6702 0.047 Uiso 1 1 calc R U . . .
H30C H 0.2300 -0.1919 0.7153 0.047 Uiso 1 1 calc R U . . .
C31 C 0.2336(5) -0.0978(2) 0.68145(13) 0.0233(10) Uani 1 1 d . . . . .
C32 C 0.2478(4) 0.0632(2) 0.59093(12) 0.0210(10) Uani 1 1 d . . . . .
H32A H 0.1805 0.0583 0.5688 0.025 Uiso 1 1 calc R U . . .
H32B H 0.3302 0.0532 0.5769 0.025 Uiso 1 1 calc R U . . .
C33 C 0.2478(4) 0.1366(2) 0.60896(12) 0.0186(9) Uani 1 1 d . . . . .
H33A H 0.1671 0.1454 0.6244 0.022 Uiso 1 1 calc R U . . .
H33B H 0.2545 0.1704 0.5848 0.022 Uiso 1 1 calc R U . . .
C34 C 0.3590(4) 0.1471(2) 0.64045(13) 0.0181(9) Uani 1 1 d . . . . .
H34 H 0.3604 0.1053 0.6598 0.022 Uiso 1 1 calc R U . . .
C35 C 0.3430(4) 0.2123(2) 0.67113(13) 0.0193(9) Uani 1 1 d . . . . .
C36 C 0.2219(4) 0.2106(2) 0.69760(12) 0.0200(9) Uani 1 1 d . . . . .
C37 C 0.1660(5) 0.2722(2) 0.71315(14) 0.0252(11) Uani 1 1 d . . . . .
H37 H 0.2017 0.3159 0.7053 0.030 Uiso 1 1 calc R U . . .
C38 C 0.0603(5) 0.2706(3) 0.73961(14) 0.0301(12) Uani 1 1 d . . . . .
H38 H 0.0243 0.3130 0.7497 0.036 Uiso 1 1 calc R U . . .
C39 C 0.0068(5) 0.2079(3) 0.75148(14) 0.0298(12) Uani 1 1 d . . . . .
H39 H -0.0664 0.2070 0.7694 0.036 Uiso 1 1 calc R U . . .
C40 C 0.0605(4) 0.1463(3) 0.73711(14) 0.0256(11) Uani 1 1 d . . . . .
H40 H 0.0245 0.1029 0.7454 0.031 Uiso 1 1 calc R U . . .
C41 C 0.1671(4) 0.1476(2) 0.71049(13) 0.0232(10) Uani 1 1 d . . . . .
H41 H 0.2031 0.1049 0.7009 0.028 Uiso 1 1 calc R U . . .
C42 C 0.3496(5) -0.0705(3) 0.70574(15) 0.0333(12) Uani 1 1 d . . . . .
H42A H 0.3531 -0.0197 0.7032 0.050 Uiso 1 1 calc R U . . .
H42B H 0.4263 -0.0908 0.6931 0.050 Uiso 1 1 calc R U . . .
H42C H 0.3437 -0.0835 0.7364 0.050 Uiso 1 1 calc R U . . .
C43 C 0.1139(5) -0.0693(3) 0.70285(15) 0.0313(12) Uani 1 1 d . . . . .
H43A H 0.1121 -0.0833 0.7335 0.047 Uiso 1 1 calc R U . . .
H43B H 0.0393 -0.0881 0.6880 0.047 Uiso 1 1 calc R U . . .
H43C H 0.1135 -0.0184 0.7008 0.047 Uiso 1 1 calc R U . . .
C44 C 0.1070(4) -0.1089(3) 0.59088(15) 0.0283(11) Uani 1 1 d . . . . .
H44A H 0.0274 -0.1022 0.6067 0.042 Uiso 1 1 calc R U . . .
H44B H 0.1222 -0.1589 0.5868 0.042 Uiso 1 1 calc R U . . .
H44C H 0.1015 -0.0861 0.5625 0.042 Uiso 1 1 calc R U . . .
C45 C 0.3909(4) -0.0939(3) 0.59564(15) 0.0285(11) Uani 1 1 d . . . . .
H45A H 0.3870 -0.0806 0.5649 0.043 Uiso 1 1 calc R U . . .
H45B H 0.4042 -0.1443 0.5980 0.043 Uiso 1 1 calc R U . . .
H45C H 0.4611 -0.0694 0.6097 0.043 Uiso 1 1 calc R U . . .
C46 C 0.4848(4) 0.1476(2) 0.61628(13) 0.0191(9) Uani 1 1 d . . . . .
C47 C 0.5068(4) 0.1895(2) 0.58248(13) 0.0238(10) Uani 1 1 d . . . . .
H47A H 0.4427 0.2206 0.5727 0.029 Uiso 1 1 calc R U . . .
H47B H 0.5864 0.1883 0.5682 0.029 Uiso 1 1 calc R U . . .
C48 C 0.7818(4) 0.0394(2) 0.61996(15) 0.0240(10) Uani 1 1 d . . . . .
C49 C 0.7124(4) 0.0134(2) 0.66128(14) 0.0256(10) Uani 1 1 d . . . . .
C50 C 0.9196(4) 0.0591(3) 0.62669(16) 0.0309(12) Uani 1 1 d . . . . .
H50A H 0.9545 0.0774 0.5995 0.046 Uiso 1 1 calc R U . . .
H50B H 0.9677 0.0178 0.6355 0.046 Uiso 1 1 calc R U . . .
H50C H 0.9257 0.0948 0.6494 0.046 Uiso 1 1 calc R U . . .
C51 C 0.7669(5) -0.0088(3) 0.58116(15) 0.0324(11) Uani 1 1 d . . . . .
H51A H 0.6775 -0.0210 0.5776 0.049 Uiso 1 1 calc R U . . .
H51B H 0.8165 -0.0512 0.5859 0.049 Uiso 1 1 calc R U . . .
H51C H 0.7972 0.0149 0.5549 0.049 Uiso 1 1 calc R U . . .
C52 C 0.7081(5) -0.0654(2) 0.66604(16) 0.0324(11) Uani 1 1 d . . . . .
H52A H 0.6658 -0.0776 0.6933 0.049 Uiso 1 1 calc R U . . .
H52B H 0.7945 -0.0839 0.6663 0.049 Uiso 1 1 calc R U . . .
H52C H 0.6612 -0.0856 0.6416 0.049 Uiso 1 1 calc R U . . .
C53 C 0.7608(5) 0.0462(2) 0.70334(14) 0.0303(11) Uani 1 1 d . . . . .
H53A H 0.7652 0.0969 0.6999 0.046 Uiso 1 1 calc R U . . .
H53B H 0.8452 0.0280 0.7099 0.046 Uiso 1 1 calc R U . . .
H53C H 0.7029 0.0348 0.7272 0.046 Uiso 1 1 calc R U . . .
C54 C 0.4599(5) 0.2159(2) 0.70292(14) 0.0251(10) Uani 1 1 d . . . . .
H54 H 0.5379 0.2149 0.6846 0.030 Uiso 1 1 calc R U . . .
C55 C 0.4670(5) 0.1530(3) 0.73366(14) 0.0294(11) Uani 1 1 d . . . . .
H55A H 0.5440 0.1561 0.7513 0.044 Uiso 1 1 calc R U . . .
H55B H 0.4687 0.1099 0.7166 0.044 Uiso 1 1 calc R U . . .
H55C H 0.3928 0.1528 0.7527 0.044 Uiso 1 1 calc R U . . .
C56 C 0.4654(5) 0.2829(3) 0.73025(15) 0.0322(12) Uani 1 1 d . . . . .
H56A H 0.3923 0.2845 0.7498 0.048 Uiso 1 1 calc R U . . .
H56B H 0.4637 0.3235 0.7110 0.048 Uiso 1 1 calc R U . . .
H56C H 0.5436 0.2834 0.7474 0.048 Uiso 1 1 calc R U . . .
C57 C 0.2609(5) 0.3065(2) 0.62005(13) 0.0238(10) Uani 1 1 d . . . . .
C58 C 0.3065(5) 0.3686(2) 0.59409(16) 0.0327(12) Uani 1 1 d . . . . .
H58A H 0.2803 0.3634 0.5637 0.049 Uiso 1 1 calc R U . . .
H58B H 0.3990 0.3712 0.5956 0.049 Uiso 1 1 calc R U . . .
H58C H 0.2699 0.4113 0.6061 0.049 Uiso 1 1 calc R U . . .
 
loop_
 _atom_site_aniso_label
 _atom_site_aniso_U_11
 _atom_site_aniso_U_22
 _atom_site_aniso_U_33
 _atom_site_aniso_U_23
 _atom_site_aniso_U_13
 _atom_site_aniso_U_12
Si1 0.0229(6) 0.0167(6) 0.0212(5) 0.0001(5) -0.0007(5) 0.0000(5)
O1 0.0243(16) 0.0176(15) 0.0205(14) 0.0010(12) -0.0022(13) 0.0024(13)
O2 0.035(2) 0.0243(18) 0.0288(17) 0.0036(14) 0.0014(15) -0.0026(16)
N1 0.029(2) 0.017(2) 0.025(2) 0.0023(16) -0.0035(18) -0.0005(19)
O3 0.0195(17) 0.0187(16) 0.0326(17) 0.0041(13) -0.0025(14) -0.0019(14)
O4 0.0186(16) 0.0207(17) 0.0242(15) 0.0015(13) 0.0000(13) -0.0010(13)
B1 0.023(3) 0.019(3) 0.019(2) -0.003(2) 0.002(2) 0.003(2)
C1 0.080(5) 0.026(3) 0.031(3) 0.012(2) -0.002(3) -0.003(3)
C2 0.034(3) 0.020(2) 0.022(2) 0.0042(18) 0.000(2) 0.000(2)
C3 0.020(2) 0.021(2) 0.019(2) 0.0003(17) 0.0022(18) 0.002(2)
C4 0.022(2) 0.013(2) 0.0183(19) 0.0017(16) 0.0007(19) 0.0017(19)
C5 0.023(2) 0.015(2) 0.018(2) 0.0022(17) -0.0010(19) -0.0016(19)
C6 0.027(2) 0.012(2) 0.019(2) 0.0005(17) 0.0022(19) 0.0002(19)
C7 0.024(2) 0.019(2) 0.0157(19) -0.0014(17) 0.0043(19) -0.006(2)
C8 0.034(3) 0.018(2) 0.025(2) -0.0017(19) -0.001(2) -0.002(2)
C9 0.041(3) 0.028(3) 0.022(2) 0.000(2) -0.005(2) -0.012(2)
C10 0.024(3) 0.036(3) 0.018(2) 0.000(2) -0.0017(19) -0.008(2)
C11 0.030(3) 0.024(3) 0.019(2) 0.0030(19) 0.001(2) 0.001(2)
C12 0.024(2) 0.024(3) 0.018(2) 0.0006(18) 0.001(2) -0.006(2)
C13 0.040(3) 0.047(3) 0.024(2) 0.001(2) -0.008(2) -0.001(3)
C14 0.046(4) 0.048(3) 0.029(3) 0.005(2) 0.013(2) 0.002(3)
C15 0.030(3) 0.026(3) 0.027(2) -0.001(2) 0.002(2) 0.002(2)
C16 0.031(3) 0.034(3) 0.041(3) -0.006(2) -0.007(2) -0.007(2)
C17 0.022(2) 0.015(2) 0.017(2) -0.0040(18) -0.0003(18) 0.004(2)
C18 0.027(3) 0.028(3) 0.023(2) -0.003(2) -0.001(2) -0.002(2)
C19 0.020(2) 0.019(2) 0.036(2) 0.0032(19) 0.002(2) -0.006(2)
C20 0.020(2) 0.022(2) 0.028(2) -0.0012(19) 0.0031(19) -0.004(2)
C21 0.030(3) 0.020(2) 0.035(3) 0.003(2) 0.002(2) -0.004(2)
C22 0.031(3) 0.023(2) 0.033(2) -0.002(2) 0.009(2) -0.005(2)
C23 0.033(3) 0.030(3) 0.035(2) 0.000(2) -0.007(2) -0.005(2)
C24 0.018(3) 0.032(3) 0.056(3) 0.003(3) 0.000(2) -0.004(2)
C25 0.027(3) 0.025(3) 0.019(2) -0.0046(19) 0.0004(19) 0.000(2)
C26 0.026(3) 0.035(3) 0.022(2) -0.002(2) 0.007(2) 0.001(2)
C27 0.045(3) 0.030(3) 0.030(3) -0.009(2) 0.005(2) 0.008(3)
C28 0.032(3) 0.017(2) 0.022(2) -0.0006(17) -0.007(2) -0.003(2)
C29 0.034(3) 0.025(3) 0.041(3) 0.009(2) -0.009(2) -0.009(2)
Si2 0.0212(6) 0.0152(6) 0.0222(5) -0.0009(5) -0.0002(5) -0.0002(5)
O5 0.0251(17) 0.0138(14) 0.0203(14) 0.0015(11) 0.0005(14) -0.0011(13)
O6 0.034(2) 0.0218(17) 0.0294(17) 0.0015(15) -0.0023(16) 0.0031(15)
N2 0.027(2) 0.0130(19) 0.0243(19) -0.0005(16) 0.0016(18) 0.0011(17)
O7 0.0180(16) 0.0209(16) 0.0312(16) 0.0021(13) -0.0002(14) -0.0019(14)
O8 0.0158(16) 0.0191(16) 0.0321(17) 0.0030(13) -0.0007(13) 0.0015(13)
B2 0.024(3) 0.020(3) 0.019(2) -0.004(2) 0.001(2) -0.003(2)
C30 0.041(3) 0.021(2) 0.033(2) 0.0063(19) -0.001(2) -0.003(2)
C31 0.032(3) 0.019(2) 0.020(2) 0.0043(17) 0.000(2) 0.000(2)
C32 0.029(3) 0.018(2) 0.0161(19) -0.0014(17) -0.0015(19) 0.001(2)
C33 0.026(2) 0.013(2) 0.0166(19) 0.0019(16) 0.0000(19) -0.0003(19)
C34 0.022(2) 0.015(2) 0.017(2) 0.0013(18) -0.0003(18) 0.0036(19)
C35 0.027(2) 0.010(2) 0.021(2) 0.0014(17) -0.0007(19) 0.002(2)
C36 0.022(2) 0.021(2) 0.0171(19) -0.0014(17) -0.0034(19) 0.003(2)
C37 0.034(3) 0.021(2) 0.021(2) 0.0002(18) -0.001(2) 0.003(2)
C38 0.038(3) 0.028(3) 0.024(2) -0.002(2) 0.003(2) 0.010(2)
C39 0.026(3) 0.043(3) 0.021(2) 0.000(2) 0.004(2) 0.005(2)
C40 0.027(3) 0.026(3) 0.024(2) -0.001(2) -0.001(2) -0.003(2)
C41 0.025(3) 0.020(2) 0.025(2) -0.0030(19) 0.0015(19) 0.000(2)
C42 0.039(3) 0.033(3) 0.028(3) 0.008(2) -0.011(2) -0.010(3)
C43 0.041(3) 0.028(3) 0.025(2) 0.001(2) 0.007(2) 0.003(2)
C44 0.028(3) 0.026(3) 0.031(3) 0.000(2) -0.009(2) 0.001(2)
C45 0.024(3) 0.032(3) 0.030(2) -0.001(2) 0.002(2) 0.001(2)
C46 0.025(2) 0.016(2) 0.016(2) -0.0037(18) -0.0003(19) -0.0035(19)
C47 0.025(3) 0.022(2) 0.024(2) -0.0015(19) 0.002(2) 0.003(2)
C48 0.018(2) 0.021(2) 0.032(2) -0.0027(19) -0.005(2) 0.003(2)
C49 0.020(2) 0.023(2) 0.033(2) 0.0010(19) -0.003(2) 0.001(2)
C50 0.020(3) 0.034(3) 0.038(3) -0.001(2) 0.002(2) 0.000(2)
C51 0.022(3) 0.036(3) 0.039(3) -0.007(2) 0.003(2) 0.004(2)
C52 0.020(3) 0.026(3) 0.052(3) 0.007(2) -0.001(2) 0.001(2)
C53 0.027(3) 0.032(3) 0.032(2) 0.004(2) 0.001(2) 0.003(2)
C54 0.030(3) 0.024(3) 0.021(2) -0.0022(19) -0.002(2) -0.002(2)
C55 0.036(3) 0.030(3) 0.022(2) -0.002(2) -0.009(2) 0.003(2)
C56 0.045(3) 0.026(3) 0.026(2) -0.006(2) -0.004(2) -0.007(3)
C57 0.032(3) 0.015(2) 0.024(2) 0.0014(18) 0.006(2) 0.000(2)
C58 0.034(3) 0.022(3) 0.042(3) 0.008(2) 0.008(2) 0.006(2)
 
_geom_special_details
;
 All esds (except the esd in the dihedral angle between two l.s. planes)
 are estimated using the full covariance matrix.  The cell esds are taken
 into account individually in the estimation of esds in distances, angles
 and torsion angles; correlations between esds in cell parameters are only
 used when they are defined by crystal symmetry.  An approximate (isotropic)
 treatment of cell esds is used for estimating esds involving l.s. planes.
;
 
loop_
 _geom_bond_atom_site_label_1
 _geom_bond_atom_site_label_2
 _geom_bond_distance
 _geom_bond_site_symmetry_2
 _geom_bond_publ_flag
Si1 O1 1.646(3) . ?
Si1 C16 1.854(5) . ?
Si1 C15 1.873(5) . ?
Si1 C2 1.884(4) . ?
O1 C3 1.437(5) . ?
O2 C28 1.236(6) . ?
N1 C28 1.341(6) . ?
N1 C6 1.473(5) . ?
N1 H1N 0.91(2) . ?
O3 B1 1.364(6) . ?
O3 C19 1.466(5) . ?
O4 B1 1.378(6) . ?
O4 C20 1.463(5) . ?
B1 C17 1.548(7) . ?
C1 C2 1.550(6) . ?
C1 H1A 0.9800 . ?
C1 H1B 0.9800 . ?
C1 H1C 0.9800 . ?
C2 C13 1.526(7) . ?
C2 C14 1.530(7) . ?
C3 C4 1.519(6) . ?
C3 H3A 0.9900 . ?
C3 H3B 0.9900 . ?
C4 C5 1.551(6) . ?
C4 H4A 0.9900 . ?
C4 H4B 0.9900 . ?
C5 C17 1.526(6) . ?
C5 C6 1.571(6) . ?
C5 H5 1.0000 . ?
C6 C7 1.528(6) . ?
C6 C25 1.574(6) . ?
C7 C12 1.392(6) . ?
C7 C8 1.400(6) . ?
C8 C9 1.391(6) . ?
C8 H8 0.9500 . ?
C9 C10 1.385(7) . ?
C9 H9 0.9500 . ?
C10 C11 1.391(6) . ?
C10 H10 0.9500 . ?
C11 C12 1.396(6) . ?
C11 H11 0.9500 . ?
C12 H12 0.9500 . ?
C13 H13A 0.9800 . ?
C13 H13B 0.9800 . ?
C13 H13C 0.9800 . ?
C14 H14A 0.9800 . ?
C14 H14B 0.9800 . ?
C14 H14C 0.9800 . ?
C15 H15A 0.9800 . ?
C15 H15B 0.9800 . ?
C15 H15C 0.9800 . ?
C16 H16A 0.9800 . ?
C16 H16B 0.9800 . ?
C16 H16C 0.9800 . ?
C17 C18 1.332(6) . ?
C18 H18A 0.9500 . ?
C18 H18B 0.9500 . ?
C19 C23 1.518(6) . ?
C19 C24 1.520(6) . ?
C19 C20 1.545(6) . ?
C20 C22 1.526(6) . ?
C20 C21 1.527(6) . ?
C21 H21A 0.9800 . ?
C21 H21B 0.9800 . ?
C21 H21C 0.9800 . ?
C22 H22A 0.9800 . ?
C22 H22B 0.9800 . ?
C22 H22C 0.9800 . ?
C23 H23A 0.9800 . ?
C23 H23B 0.9800 . ?
C23 H23C 0.9800 . ?
C24 H24A 0.9800 . ?
C24 H24B 0.9800 . ?
C24 H24C 0.9800 . ?
C25 C27 1.532(6) . ?
C25 C26 1.534(6) . ?
C25 H25 1.0000 . ?
C26 H26A 0.9800 . ?
C26 H26B 0.9800 . ?
C26 H26C 0.9800 . ?
C27 H27A 0.9800 . ?
C27 H27B 0.9800 . ?
C27 H27C 0.9800 . ?
C28 C29 1.513(6) . ?
C29 H29A 0.9800 . ?
C29 H29B 0.9800 . ?
C29 H29C 0.9800 . ?
Si2 O5 1.639(3) . ?
Si2 C45 1.855(5) . ?
Si2 C44 1.870(5) . ?
Si2 C31 1.888(4) . ?
O5 C32 1.437(5) . ?
O6 C57 1.233(6) . ?
N2 C57 1.347(6) . ?
N2 C35 1.482(5) . ?
N2 H2N 0.91(2) . ?
O7 B2 1.358(6) . ?
O7 C48 1.462(5) . ?
O8 B2 1.378(6) . ?
O8 C49 1.461(5) . ?
B2 C46 1.565(7) . ?
C30 C31 1.544(6) . ?
C30 H30A 0.9800 . ?
C30 H30B 0.9800 . ?
C30 H30C 0.9800 . ?
C31 C43 1.528(6) . ?
C31 C42 1.529(6) . ?
C32 C33 1.515(5) . ?
C32 H32A 0.9900 . ?
C32 H32B 0.9900 . ?
C33 C34 1.537(6) . ?
C33 H33A 0.9900 . ?
C33 H33B 0.9900 . ?
C34 C46 1.524(6) . ?
C34 C35 1.576(6) . ?
C34 H34 1.0000 . ?
C35 C36 1.518(6) . ?
C35 C54 1.578(6) . ?
C36 C41 1.399(6) . ?
C36 C37 1.406(6) . ?
C37 C38 1.383(7) . ?
C37 H37 0.9500 . ?
C38 C39 1.379(7) . ?
C38 H38 0.9500 . ?
C39 C40 1.385(7) . ?
C39 H39 0.9500 . ?
C40 C41 1.393(6) . ?
C40 H40 0.9500 . ?
C41 H41 0.9500 . ?
C42 H42A 0.9800 . ?
C42 H42B 0.9800 . ?
C42 H42C 0.9800 . ?
C43 H43A 0.9800 . ?
C43 H43B 0.9800 . ?
C43 H43C 0.9800 . ?
C44 H44A 0.9800 . ?
C44 H44B 0.9800 . ?
C44 H44C 0.9800 . ?
C45 H45A 0.9800 . ?
C45 H45B 0.9800 . ?
C45 H45C 0.9800 . ?
C46 C47 1.337(6) . ?
C47 H47A 0.9500 . ?
C47 H47B 0.9500 . ?
C48 C51 1.518(6) . ?
C48 C50 1.520(6) . ?
C48 C49 1.551(6) . ?
C49 C52 1.521(6) . ?
C49 C53 1.528(6) . ?
C50 H50A 0.9800 . ?
C50 H50B 0.9800 . ?
C50 H50C 0.9800 . ?
C51 H51A 0.9800 . ?
C51 H51B 0.9800 . ?
C51 H51C 0.9800 . ?
C52 H52A 0.9800 . ?
C52 H52B 0.9800 . ?
C52 H52C 0.9800 . ?
C53 H53A 0.9800 . ?
C53 H53B 0.9800 . ?
C53 H53C 0.9800 . ?
C54 C55 1.536(6) . ?
C54 C56 1.539(6) . ?
C54 H54 1.0000 . ?
C55 H55A 0.9800 . ?
C55 H55B 0.9800 . ?
C55 H55C 0.9800 . ?
C56 H56A 0.9800 . ?
C56 H56B 0.9800 . ?
C56 H56C 0.9800 . ?
C57 C58 1.513(6) . ?
C58 H58A 0.9800 . ?
C58 H58B 0.9800 . ?
C58 H58C 0.9800 . ?
 
loop_
 _geom_angle_atom_site_label_1
 _geom_angle_atom_site_label_2
 _geom_angle_atom_site_label_3
 _geom_angle
 _geom_angle_site_symmetry_1
 _geom_angle_site_symmetry_3
 _geom_angle_publ_flag
O1 Si1 C16 110.5(2) . . ?
O1 Si1 C15 109.91(19) . . ?
C16 Si1 C15 109.3(2) . . ?
O1 Si1 C2 104.24(18) . . ?
C16 Si1 C2 111.8(2) . . ?
C15 Si1 C2 111.0(2) . . ?
C3 O1 Si1 125.5(2) . . ?
C28 N1 C6 128.3(4) . . ?
C28 N1 H1N 116(3) . . ?
C6 N1 H1N 114(3) . . ?
B1 O3 C19 106.9(3) . . ?
B1 O4 C20 106.4(3) . . ?
O3 B1 O4 113.1(4) . . ?
O3 B1 C17 121.8(4) . . ?
O4 B1 C17 125.0(4) . . ?
C2 C1 H1A 109.5 . . ?
C2 C1 H1B 109.5 . . ?
H1A C1 H1B 109.5 . . ?
C2 C1 H1C 109.5 . . ?
H1A C1 H1C 109.5 . . ?
H1B C1 H1C 109.5 . . ?
C13 C2 C14 109.0(4) . . ?
C13 C2 C1 108.7(4) . . ?
C14 C2 C1 109.4(4) . . ?
C13 C2 Si1 110.6(3) . . ?
C14 C2 Si1 110.4(3) . . ?
C1 C2 Si1 108.6(3) . . ?
O1 C3 C4 108.9(3) . . ?
O1 C3 H3A 109.9 . . ?
C4 C3 H3A 109.9 . . ?
O1 C3 H3B 109.9 . . ?
C4 C3 H3B 109.9 . . ?
H3A C3 H3B 108.3 . . ?
C3 C4 C5 109.8(3) . . ?
C3 C4 H4A 109.7 . . ?
C5 C4 H4A 109.7 . . ?
C3 C4 H4B 109.7 . . ?
C5 C4 H4B 109.7 . . ?
H4A C4 H4B 108.2 . . ?
C17 C5 C4 111.1(3) . . ?
C17 C5 C6 111.4(3) . . ?
C4 C5 C6 115.0(3) . . ?
C17 C5 H5 106.2 . . ?
C4 C5 H5 106.2 . . ?
C6 C5 H5 106.2 . . ?
N1 C6 C7 110.7(3) . . ?
N1 C6 C5 110.2(3) . . ?
C7 C6 C5 113.5(3) . . ?
N1 C6 C25 105.1(3) . . ?
C7 C6 C25 108.7(3) . . ?
C5 C6 C25 108.2(3) . . ?
C12 C7 C8 117.4(4) . . ?
C12 C7 C6 122.3(4) . . ?
C8 C7 C6 120.0(4) . . ?
C9 C8 C7 121.2(5) . . ?
C9 C8 H8 119.4 . . ?
C7 C8 H8 119.4 . . ?
C10 C9 C8 120.6(5) . . ?
C10 C9 H9 119.7 . . ?
C8 C9 H9 119.7 . . ?
C9 C10 C11 119.2(4) . . ?
C9 C10 H10 120.4 . . ?
C11 C10 H10 120.4 . . ?
C10 C11 C12 119.9(5) . . ?
C10 C11 H11 120.0 . . ?
C12 C11 H11 120.0 . . ?
C7 C12 C11 121.7(4) . . ?
C7 C12 H12 119.1 . . ?
C11 C12 H12 119.1 . . ?
C2 C13 H13A 109.5 . . ?
C2 C13 H13B 109.5 . . ?
H13A C13 H13B 109.5 . . ?
C2 C13 H13C 109.5 . . ?
H13A C13 H13C 109.5 . . ?
H13B C13 H13C 109.5 . . ?
C2 C14 H14A 109.5 . . ?
C2 C14 H14B 109.5 . . ?
H14A C14 H14B 109.5 . . ?
C2 C14 H14C 109.5 . . ?
H14A C14 H14C 109.5 . . ?
H14B C14 H14C 109.5 . . ?
Si1 C15 H15A 109.5 . . ?
Si1 C15 H15B 109.5 . . ?
H15A C15 H15B 109.5 . . ?
Si1 C15 H15C 109.5 . . ?
H15A C15 H15C 109.5 . . ?
H15B C15 H15C 109.5 . . ?
Si1 C16 H16A 109.5 . . ?
Si1 C16 H16B 109.5 . . ?
H16A C16 H16B 109.5 . . ?
Si1 C16 H16C 109.5 . . ?
H16A C16 H16C 109.5 . . ?
H16B C16 H16C 109.5 . . ?
C18 C17 C5 122.6(4) . . ?
C18 C17 B1 116.4(4) . . ?
C5 C17 B1 120.9(4) . . ?
C17 C18 H18A 120.0 . . ?
C17 C18 H18B 120.0 . . ?
H18A C18 H18B 120.0 . . ?
O3 C19 C23 105.9(3) . . ?
O3 C19 C24 108.3(4) . . ?
C23 C19 C24 110.6(4) . . ?
O3 C19 C20 102.1(3) . . ?
C23 C19 C20 113.5(4) . . ?
C24 C19 C20 115.5(4) . . ?
O4 C20 C22 106.6(4) . . ?
O4 C20 C21 108.2(4) . . ?
C22 C20 C21 109.7(4) . . ?
O4 C20 C19 102.7(3) . . ?
C22 C20 C19 113.9(4) . . ?
C21 C20 C19 115.1(4) . . ?
C20 C21 H21A 109.5 . . ?
C20 C21 H21B 109.5 . . ?
H21A C21 H21B 109.5 . . ?
C20 C21 H21C 109.5 . . ?
H21A C21 H21C 109.5 . . ?
H21B C21 H21C 109.5 . . ?
C20 C22 H22A 109.5 . . ?
C20 C22 H22B 109.5 . . ?
H22A C22 H22B 109.5 . . ?
C20 C22 H22C 109.5 . . ?
H22A C22 H22C 109.5 . . ?
H22B C22 H22C 109.5 . . ?
C19 C23 H23A 109.5 . . ?
C19 C23 H23B 109.5 . . ?
H23A C23 H23B 109.5 . . ?
C19 C23 H23C 109.5 . . ?
H23A C23 H23C 109.5 . . ?
H23B C23 H23C 109.5 . . ?
C19 C24 H24A 109.5 . . ?
C19 C24 H24B 109.5 . . ?
H24A C24 H24B 109.5 . . ?
C19 C24 H24C 109.5 . . ?
H24A C24 H24C 109.5 . . ?
H24B C24 H24C 109.5 . . ?
C27 C25 C26 108.4(4) . . ?
C27 C25 C6 114.3(4) . . ?
C26 C25 C6 113.5(4) . . ?
C27 C25 H25 106.7 . . ?
C26 C25 H25 106.7 . . ?
C6 C25 H25 106.7 . . ?
C25 C26 H26A 109.5 . . ?
C25 C26 H26B 109.5 . . ?
H26A C26 H26B 109.5 . . ?
C25 C26 H26C 109.5 . . ?
H26A C26 H26C 109.5 . . ?
H26B C26 H26C 109.5 . . ?
C25 C27 H27A 109.5 . . ?
C25 C27 H27B 109.5 . . ?
H27A C27 H27B 109.5 . . ?
C25 C27 H27C 109.5 . . ?
H27A C27 H27C 109.5 . . ?
H27B C27 H27C 109.5 . . ?
O2 C28 N1 124.4(4) . . ?
O2 C28 C29 121.4(4) . . ?
N1 C28 C29 114.2(4) . . ?
C28 C29 H29A 109.5 . . ?
C28 C29 H29B 109.5 . . ?
H29A C29 H29B 109.5 . . ?
C28 C29 H29C 109.5 . . ?
H29A C29 H29C 109.5 . . ?
H29B C29 H29C 109.5 . . ?
O5 Si2 C45 110.4(2) . . ?
O5 Si2 C44 111.09(19) . . ?
C45 Si2 C44 108.2(2) . . ?
O5 Si2 C31 102.81(17) . . ?
C45 Si2 C31 113.1(2) . . ?
C44 Si2 C31 111.2(2) . . ?
C32 O5 Si2 125.7(2) . . ?
C57 N2 C35 128.6(4) . . ?
C57 N2 H2N 120(3) . . ?
C35 N2 H2N 110(3) . . ?
B2 O7 C48 107.1(4) . . ?
B2 O8 C49 105.9(3) . . ?
O7 B2 O8 113.5(4) . . ?
O7 B2 C46 121.5(4) . . ?
O8 B2 C46 125.0(4) . . ?
C31 C30 H30A 109.5 . . ?
C31 C30 H30B 109.5 . . ?
H30A C30 H30B 109.5 . . ?
C31 C30 H30C 109.5 . . ?
H30A C30 H30C 109.5 . . ?
H30B C30 H30C 109.5 . . ?
C43 C31 C42 109.3(4) . . ?
C43 C31 C30 108.4(4) . . ?
C42 C31 C30 108.9(4) . . ?
C43 C31 Si2 110.0(3) . . ?
C42 C31 Si2 110.0(3) . . ?
C30 C31 Si2 110.2(3) . . ?
O5 C32 C33 109.1(3) . . ?
O5 C32 H32A 109.9 . . ?
C33 C32 H32A 109.9 . . ?
O5 C32 H32B 109.9 . . ?
C33 C32 H32B 109.9 . . ?
H32A C32 H32B 108.3 . . ?
C32 C33 C34 110.7(4) . . ?
C32 C33 H33A 109.5 . . ?
C34 C33 H33A 109.5 . . ?
C32 C33 H33B 109.5 . . ?
C34 C33 H33B 109.5 . . ?
H33A C33 H33B 108.1 . . ?
C46 C34 C33 111.1(3) . . ?
C46 C34 C35 112.5(4) . . ?
C33 C34 C35 113.6(3) . . ?
C46 C34 H34 106.4 . . ?
C33 C34 H34 106.4 . . ?
C35 C34 H34 106.4 . . ?
N2 C35 C36 111.0(4) . . ?
N2 C35 C34 109.2(3) . . ?
C36 C35 C34 113.3(4) . . ?
N2 C35 C54 104.9(4) . . ?
C36 C35 C54 109.1(3) . . ?
C34 C35 C54 108.8(3) . . ?
C41 C36 C37 117.2(4) . . ?
C41 C36 C35 121.3(4) . . ?
C37 C36 C35 121.3(4) . . ?
C38 C37 C36 121.4(5) . . ?
C38 C37 H37 119.3 . . ?
C36 C37 H37 119.3 . . ?
C39 C38 C37 120.5(5) . . ?
C39 C38 H38 119.8 . . ?
C37 C38 H38 119.8 . . ?
C38 C39 C40 119.5(5) . . ?
C38 C39 H39 120.2 . . ?
C40 C39 H39 120.2 . . ?
C39 C40 C41 120.3(5) . . ?
C39 C40 H40 119.9 . . ?
C41 C40 H40 119.9 . . ?
C40 C41 C36 121.2(4) . . ?
C40 C41 H41 119.4 . . ?
C36 C41 H41 119.4 . . ?
C31 C42 H42A 109.5 . . ?
C31 C42 H42B 109.5 . . ?
H42A C42 H42B 109.5 . . ?
C31 C42 H42C 109.5 . . ?
H42A C42 H42C 109.5 . . ?
H42B C42 H42C 109.5 . . ?
C31 C43 H43A 109.5 . . ?
C31 C43 H43B 109.5 . . ?
H43A C43 H43B 109.5 . . ?
C31 C43 H43C 109.5 . . ?
H43A C43 H43C 109.5 . . ?
H43B C43 H43C 109.5 . . ?
Si2 C44 H44A 109.5 . . ?
Si2 C44 H44B 109.5 . . ?
H44A C44 H44B 109.5 . . ?
Si2 C44 H44C 109.5 . . ?
H44A C44 H44C 109.5 . . ?
H44B C44 H44C 109.5 . . ?
Si2 C45 H45A 109.5 . . ?
Si2 C45 H45B 109.5 . . ?
H45A C45 H45B 109.5 . . ?
Si2 C45 H45C 109.5 . . ?
H45A C45 H45C 109.5 . . ?
H45B C45 H45C 109.5 . . ?
C47 C46 C34 122.4(4) . . ?
C47 C46 B2 115.2(4) . . ?
C34 C46 B2 122.4(4) . . ?
C46 C47 H47A 120.0 . . ?
C46 C47 H47B 120.0 . . ?
H47A C47 H47B 120.0 . . ?
O7 C48 C51 106.4(3) . . ?
O7 C48 C50 108.2(4) . . ?
C51 C48 C50 111.0(4) . . ?
O7 C48 C49 101.8(3) . . ?
C51 C48 C49 113.7(4) . . ?
C50 C48 C49 114.9(4) . . ?
O8 C49 C52 108.9(4) . . ?
O8 C49 C53 106.6(4) . . ?
C52 C49 C53 109.8(4) . . ?
O8 C49 C48 102.7(3) . . ?
C52 C49 C48 114.4(4) . . ?
C53 C49 C48 113.9(4) . . ?
C48 C50 H50A 109.5 . . ?
C48 C50 H50B 109.5 . . ?
H50A C50 H50B 109.5 . . ?
C48 C50 H50C 109.5 . . ?
H50A C50 H50C 109.5 . . ?
H50B C50 H50C 109.5 . . ?
C48 C51 H51A 109.5 . . ?
C48 C51 H51B 109.5 . . ?
H51A C51 H51B 109.5 . . ?
C48 C51 H51C 109.5 . . ?
H51A C51 H51C 109.5 . . ?
H51B C51 H51C 109.5 . . ?
C49 C52 H52A 109.5 . . ?
C49 C52 H52B 109.5 . . ?
H52A C52 H52B 109.5 . . ?
C49 C52 H52C 109.5 . . ?
H52A C52 H52C 109.5 . . ?
H52B C52 H52C 109.5 . . ?
C49 C53 H53A 109.5 . . ?
C49 C53 H53B 109.5 . . ?
H53A C53 H53B 109.5 . . ?
C49 C53 H53C 109.5 . . ?
H53A C53 H53C 109.5 . . ?
H53B C53 H53C 109.5 . . ?
C55 C54 C56 108.6(4) . . ?
C55 C54 C35 112.7(4) . . ?
C56 C54 C35 113.9(4) . . ?
C55 C54 H54 107.1 . . ?
C56 C54 H54 107.1 . . ?
C35 C54 H54 107.1 . . ?
C54 C55 H55A 109.5 . . ?
C54 C55 H55B 109.5 . . ?
H55A C55 H55B 109.5 . . ?
C54 C55 H55C 109.5 . . ?
H55A C55 H55C 109.5 . . ?
H55B C55 H55C 109.5 . . ?
C54 C56 H56A 109.5 . . ?
C54 C56 H56B 109.5 . . ?
H56A C56 H56B 109.5 . . ?
C54 C56 H56C 109.5 . . ?
H56A C56 H56C 109.5 . . ?
H56B C56 H56C 109.5 . . ?
O6 C57 N2 125.0(4) . . ?
O6 C57 C58 120.9(4) . . ?
N2 C57 C58 114.1(4) . . ?
C57 C58 H58A 109.5 . . ?
C57 C58 H58B 109.5 . . ?
H58A C58 H58B 109.5 . . ?
C57 C58 H58C 109.5 . . ?
H58A C58 H58C 109.5 . . ?
H58B C58 H58C 109.5 . . ?
 
loop_
 _geom_torsion_atom_site_label_1
 _geom_torsion_atom_site_label_2
 _geom_torsion_atom_site_label_3
 _geom_torsion_atom_site_label_4
 _geom_torsion
 _geom_torsion_site_symmetry_1
 _geom_torsion_site_symmetry_2
 _geom_torsion_site_symmetry_3
 _geom_torsion_site_symmetry_4
 _geom_torsion_publ_flag
C16 Si1 O1 C3 50.2(4) . . . . ?
C15 Si1 O1 C3 -70.4(4) . . . . ?
C2 Si1 O1 C3 170.5(3) . . . . ?
C19 O3 B1 O4 10.7(5) . . . . ?
C19 O3 B1 C17 -168.0(4) . . . . ?
C20 O4 B1 O3 9.2(5) . . . . ?
C20 O4 B1 C17 -172.1(4) . . . . ?
O1 Si1 C2 C13 61.0(4) . . . . ?
C16 Si1 C2 C13 -179.6(3) . . . . ?
C15 Si1 C2 C13 -57.3(4) . . . . ?
O1 Si1 C2 C14 -59.8(4) . . . . ?
C16 Si1 C2 C14 59.6(4) . . . . ?
C15 Si1 C2 C14 -178.1(3) . . . . ?
O1 Si1 C2 C1 -179.8(4) . . . . ?
C16 Si1 C2 C1 -60.4(4) . . . . ?
C15 Si1 C2 C1 61.9(4) . . . . ?
Si1 O1 C3 C4 -169.6(3) . . . . ?
O1 C3 C4 C5 64.6(4) . . . . ?
C3 C4 C5 C17 73.3(4) . . . . ?
C3 C4 C5 C6 -159.1(3) . . . . ?
C28 N1 C6 C7 -48.1(5) . . . . ?
C28 N1 C6 C5 78.3(5) . . . . ?
C28 N1 C6 C25 -165.3(4) . . . . ?
C17 C5 C6 N1 55.7(4) . . . . ?
C4 C5 C6 N1 -71.8(4) . . . . ?
C17 C5 C6 C7 -179.5(3) . . . . ?
C4 C5 C6 C7 53.0(5) . . . . ?
C17 C5 C6 C25 -58.7(4) . . . . ?
C4 C5 C6 C25 173.8(3) . . . . ?
N1 C6 C7 C12 151.7(4) . . . . ?
C5 C6 C7 C12 27.2(5) . . . . ?
C25 C6 C7 C12 -93.2(5) . . . . ?
N1 C6 C7 C8 -34.0(5) . . . . ?
C5 C6 C7 C8 -158.5(4) . . . . ?
C25 C6 C7 C8 81.0(5) . . . . ?
C12 C7 C8 C9 -1.6(6) . . . . ?
C6 C7 C8 C9 -176.1(4) . . . . ?
C7 C8 C9 C10 0.4(7) . . . . ?
C8 C9 C10 C11 0.1(7) . . . . ?
C9 C10 C11 C12 0.5(7) . . . . ?
C8 C7 C12 C11 2.2(6) . . . . ?
C6 C7 C12 C11 176.6(4) . . . . ?
C10 C11 C12 C7 -1.7(6) . . . . ?
C4 C5 C17 C18 50.6(5) . . . . ?
C6 C5 C17 C18 -79.0(5) . . . . ?
C4 C5 C17 B1 -126.7(4) . . . . ?
C6 C5 C17 B1 103.7(4) . . . . ?
O3 B1 C17 C18 17.6(6) . . . . ?
O4 B1 C17 C18 -161.0(4) . . . . ?
O3 B1 C17 C5 -164.9(4) . . . . ?
O4 B1 C17 C5 16.5(6) . . . . ?
B1 O3 C19 C23 94.4(4) . . . . ?
B1 O3 C19 C24 -146.9(4) . . . . ?
B1 O3 C19 C20 -24.6(4) . . . . ?
B1 O4 C20 C22 96.1(4) . . . . ?
B1 O4 C20 C21 -146.0(4) . . . . ?
B1 O4 C20 C19 -23.8(4) . . . . ?
O3 C19 C20 O4 29.2(4) . . . . ?
C23 C19 C20 O4 -84.3(4) . . . . ?
C24 C19 C20 O4 146.4(4) . . . . ?
O3 C19 C20 C22 -85.6(4) . . . . ?
C23 C19 C20 C22 160.8(4) . . . . ?
C24 C19 C20 C22 31.6(5) . . . . ?
O3 C19 C20 C21 146.5(4) . . . . ?
C23 C19 C20 C21 32.9(5) . . . . ?
C24 C19 C20 C21 -96.3(5) . . . . ?
N1 C6 C25 C27 51.9(5) . . . . ?
C7 C6 C25 C27 -66.7(5) . . . . ?
C5 C6 C25 C27 169.6(4) . . . . ?
N1 C6 C25 C26 176.9(4) . . . . ?
C7 C6 C25 C26 58.3(5) . . . . ?
C5 C6 C25 C26 -65.4(4) . . . . ?
C6 N1 C28 O2 5.6(7) . . . . ?
C6 N1 C28 C29 -176.7(4) . . . . ?
C45 Si2 O5 C32 47.3(4) . . . . ?
C44 Si2 O5 C32 -72.8(4) . . . . ?
C31 Si2 O5 C32 168.2(3) . . . . ?
C48 O7 B2 O8 9.8(5) . . . . ?
C48 O7 B2 C46 -169.1(4) . . . . ?
C49 O8 B2 O7 10.3(5) . . . . ?
C49 O8 B2 C46 -170.8(4) . . . . ?
O5 Si2 C31 C43 54.6(3) . . . . ?
C45 Si2 C31 C43 173.6(3) . . . . ?
C44 Si2 C31 C43 -64.4(4) . . . . ?
O5 Si2 C31 C42 -65.9(4) . . . . ?
C45 Si2 C31 C42 53.1(4) . . . . ?
C44 Si2 C31 C42 175.1(3) . . . . ?
O5 Si2 C31 C30 174.0(3) . . . . ?
C45 Si2 C31 C30 -67.0(4) . . . . ?
C44 Si2 C31 C30 55.1(4) . . . . ?
Si2 O5 C32 C33 -170.1(3) . . . . ?
O5 C32 C33 C34 64.5(5) . . . . ?
C32 C33 C34 C46 69.8(4) . . . . ?
C32 C33 C34 C35 -162.2(3) . . . . ?
C57 N2 C35 C36 -46.1(6) . . . . ?
C57 N2 C35 C34 79.6(5) . . . . ?
C57 N2 C35 C54 -163.8(4) . . . . ?
C46 C34 C35 N2 59.2(5) . . . . ?
C33 C34 C35 N2 -68.1(5) . . . . ?
C46 C34 C35 C36 -176.5(3) . . . . ?
C33 C34 C35 C36 56.3(4) . . . . ?
C46 C34 C35 C54 -54.8(4) . . . . ?
C33 C34 C35 C54 177.9(3) . . . . ?
N2 C35 C36 C41 153.7(4) . . . . ?
C34 C35 C36 C41 30.3(5) . . . . ?
C54 C35 C36 C41 -91.1(5) . . . . ?
N2 C35 C36 C37 -31.6(5) . . . . ?
C34 C35 C36 C37 -154.9(4) . . . . ?
C54 C35 C36 C37 83.6(5) . . . . ?
C41 C36 C37 C38 -0.8(6) . . . . ?
C35 C36 C37 C38 -175.8(4) . . . . ?
C36 C37 C38 C39 0.0(7) . . . . ?
C37 C38 C39 C40 0.7(7) . . . . ?
C38 C39 C40 C41 -0.7(7) . . . . ?
C39 C40 C41 C36 -0.2(7) . . . . ?
C37 C36 C41 C40 0.9(6) . . . . ?
C35 C36 C41 C40 175.9(4) . . . . ?
C33 C34 C46 C47 53.3(5) . . . . ?
C35 C34 C46 C47 -75.3(5) . . . . ?
C33 C34 C46 B2 -123.0(4) . . . . ?
C35 C34 C46 B2 108.4(4) . . . . ?
O7 B2 C46 C47 12.2(6) . . . . ?
O8 B2 C46 C47 -166.5(4) . . . . ?
O7 B2 C46 C34 -171.3(4) . . . . ?
O8 B2 C46 C34 10.0(7) . . . . ?
B2 O7 C48 C51 95.1(4) . . . . ?
B2 O7 C48 C50 -145.6(4) . . . . ?
B2 O7 C48 C49 -24.1(4) . . . . ?
B2 O8 C49 C52 -146.1(4) . . . . ?
B2 O8 C49 C53 95.5(4) . . . . ?
B2 O8 C49 C48 -24.5(4) . . . . ?
O7 C48 C49 O8 29.4(4) . . . . ?
C51 C48 C49 O8 -84.6(4) . . . . ?
C50 C48 C49 O8 146.0(4) . . . . ?
O7 C48 C49 C52 147.2(4) . . . . ?
C51 C48 C49 C52 33.2(6) . . . . ?
C50 C48 C49 C52 -96.2(5) . . . . ?
O7 C48 C49 C53 -85.5(4) . . . . ?
C51 C48 C49 C53 160.5(4) . . . . ?
C50 C48 C49 C53 31.1(6) . . . . ?
N2 C35 C54 C55 179.3(4) . . . . ?
C36 C35 C54 C55 60.2(5) . . . . ?
C34 C35 C54 C55 -63.9(5) . . . . ?
N2 C35 C54 C56 55.0(5) . . . . ?
C36 C35 C54 C56 -64.1(5) . . . . ?
C34 C35 C54 C56 171.8(4) . . . . ?
C35 N2 C57 O6 7.8(7) . . . . ?
C35 N2 C57 C58 -174.1(4) . . . . ?
 
loop_
 _geom_hbond_atom_site_label_D 
 _geom_hbond_atom_site_label_H 
 _geom_hbond_atom_site_label_A 
 _geom_hbond_distance_DH 
 _geom_hbond_distance_HA 
 _geom_hbond_distance_DA 
 _geom_hbond_angle_DHA 
 _geom_hbond_site_symmetry_A 
N1 H1N O6  0.91(2) 2.51(3) 3.421(5) 172(4) 1_655
N2 H2N O2  0.91(2) 2.42(3) 3.324(5) 174(5) .
 
_refine_diff_density_max    0.386
_refine_diff_density_min   -0.393
_refine_diff_density_rms    0.062

_shelx_res_file
;

    sad_a.res created by SHELXL-2014/7


TITL sad_a.res in P2(1)2(1)2(1)
CELL  1.54178  10.5698  19.1960  30.7942   90.000   90.000   90.000
ZERR   8.000   0.0004   0.0007   0.0010    0.000    0.000    0.000
LATT -1
SYMM 1/2-X, -Y, 1/2+Z
SYMM -X, 1/2+Y, 1/2-Z
SYMM 1/2+X, 1/2-Y, -Z
SFAC C  H  B  O  Si N
UNIT 232 400 8 32 8 8
L.S. 10
BOND $H
FMAP 2
PLAN -20
SIZE 0.38 0.12 0.08
TEMP -173
DFIX 0.91 N1 H1N N2 H2N
OMIT 11 0 2
OMIT 10 1 1
OMIT -11 1 3
OMIT  0 22 7
OMIT -2 21 6
OMIT 11 2 3
OMIT 12 2 7
OMIT 11 1 3
OMIT -12 2 7
CONF
EQIV $1 x+1, y, z
HTAB N1 O6_$1
HTAB N2 O2
ACTA
WGHT    0.048300    1.713600
FVAR       0.18121
SI1   5    0.718283    0.695551    0.614293    11.00000    0.02294    0.01665 =
         0.02123    0.00007   -0.00069   -0.00002
O1    4    0.704784    0.610227    0.616533    11.00000    0.02425    0.01757 =
         0.02048    0.00102   -0.00221    0.00237
O2    4    0.644907    0.337170    0.637032    11.00000    0.03519    0.02426 =
         0.02878    0.00360    0.00142   -0.00259
N1    6    0.845640    0.348167    0.610849    11.00000    0.02937    0.01674 =
         0.02508    0.00227   -0.00347   -0.00046
H1N   2    0.926924    0.333874    0.615606    11.00000    0.03062
O3    4    1.194795    0.516357    0.644506    11.00000    0.01948    0.01870 =
         0.03258    0.00409   -0.00253   -0.00190
O4    4    1.070816    0.581431    0.599030    11.00000    0.01863    0.02068 =
         0.02425    0.00147   -0.00001   -0.00098
B1    3    1.077135    0.525879    0.627309    11.00000    0.02341    0.01852 =
         0.01868   -0.00282    0.00184    0.00260
C1    1    0.726082    0.795910    0.548551    11.00000    0.07997    0.02623 =
         0.03133    0.01178   -0.00153   -0.00289
AFIX 137
H1A   2    0.720478    0.807475    0.517614    11.00000   -1.50000
H1B   2    0.807942    0.811384    0.559964    11.00000   -1.50000
H1C   2    0.657771    0.819378    0.564331    11.00000   -1.50000
AFIX   0
C2    1    0.713515    0.716003    0.554476    11.00000    0.03450    0.02026 =
         0.02153    0.00424   -0.00008   -0.00044
C3    1    0.721526    0.568362    0.654799    11.00000    0.02033    0.02092 =
         0.01945    0.00034    0.00222    0.00190
AFIX  23
H3A   2    0.650761    0.576470    0.675245    11.00000   -1.20000
H3B   2    0.801438    0.581261    0.669515    11.00000   -1.20000
AFIX   0
C4    1    0.725287    0.492096    0.641671    11.00000    0.02200    0.01251 =
         0.01835    0.00169    0.00071    0.00172
AFIX  23
H4A   2    0.647542    0.480107    0.625374    11.00000   -1.20000
H4B   2    0.728823    0.462460    0.667954    11.00000   -1.20000
AFIX   0
C5    1    0.843106    0.478176    0.612933    11.00000    0.02326    0.01451 =
         0.01810    0.00220   -0.00103   -0.00162
AFIX  13
H5    2    0.849564    0.518561    0.592540    11.00000   -1.20000
AFIX   0
C6    1    0.834886    0.411180    0.583780    11.00000    0.02707    0.01155 =
         0.01877    0.00050    0.00217    0.00018
C7    1    0.715874    0.408258    0.555688    11.00000    0.02370    0.01933 =
         0.01574   -0.00135    0.00427   -0.00615
C8    1    0.672865    0.344330    0.539565    11.00000    0.03351    0.01815 =
         0.02544   -0.00165   -0.00131   -0.00231
AFIX  43
H8    2    0.715175    0.302682    0.547738    11.00000   -1.20000
AFIX   0
C9    1    0.569310    0.340678    0.511796    11.00000    0.04109    0.02826 =
         0.02152    0.00038   -0.00487   -0.01188
AFIX  43
H9    2    0.541476    0.296665    0.501418    11.00000   -1.20000
AFIX   0
C10   1    0.506389    0.400615    0.499134    11.00000    0.02397    0.03637 =
         0.01776   -0.00009   -0.00175   -0.00841
AFIX  43
H10   2    0.435562    0.397951    0.480214    11.00000   -1.20000
AFIX   0
C11   1    0.548207    0.464740    0.514466    11.00000    0.02960    0.02351 =
         0.01909    0.00296    0.00106    0.00097
AFIX  43
H11   2    0.505543    0.506241    0.506219    11.00000   -1.20000
AFIX   0
C12   1    0.652950    0.468049    0.541989    11.00000    0.02406    0.02368 =
         0.01789    0.00062    0.00093   -0.00579
AFIX  43
H12   2    0.682051    0.512249    0.551622    11.00000   -1.20000
AFIX   0
C13   1    0.588310    0.692410    0.534688    11.00000    0.04037    0.04664 =
         0.02376    0.00121   -0.00848   -0.00053
AFIX 137
H13A  2    0.587552    0.703384    0.503609    11.00000   -1.50000
H13B  2    0.518309    0.716654    0.549078    11.00000   -1.50000
H13C  2    0.578648    0.642039    0.538667    11.00000   -1.50000
AFIX   0
C14   1    0.822277    0.679517    0.530873    11.00000    0.04574    0.04794 =
         0.02869    0.00482    0.01291    0.00249
AFIX 137
H14A  2    0.813495    0.628965    0.534143    11.00000   -1.50000
H14B  2    0.903055    0.694531    0.543380    11.00000   -1.50000
H14C  2    0.819951    0.691682    0.499976    11.00000   -1.50000
AFIX   0
C15   1    0.582636    0.737399    0.643439    11.00000    0.02969    0.02578 =
         0.02711   -0.00126    0.00223    0.00222
AFIX 137
H15A  2    0.503701    0.727131    0.628020    11.00000   -1.50000
H15B  2    0.595557    0.787927    0.644465    11.00000   -1.50000
H15C  2    0.577660    0.719042    0.673086    11.00000   -1.50000
AFIX   0
C16   1    0.868860    0.724086    0.639520    11.00000    0.03085    0.03407 =
         0.04103   -0.00591   -0.00678   -0.00709
AFIX 137
H16A  2    0.863886    0.717878    0.671062    11.00000   -1.50000
H16B  2    0.883541    0.773349    0.632858    11.00000   -1.50000
H16C  2    0.938755    0.696118    0.627976    11.00000   -1.50000
AFIX   0
C17   1    0.964093    0.478785    0.639979    11.00000    0.02245    0.01499 =
         0.01682   -0.00403   -0.00027    0.00372
C18   1    0.976968    0.441658    0.676261    11.00000    0.02727    0.02757 =
         0.02287   -0.00293   -0.00064   -0.00233
AFIX  93
H18A  2    0.909206    0.413352    0.686231    11.00000   -1.20000
H18B  2    1.053913    0.443489    0.692165    11.00000   -1.20000
AFIX   0
C19   1    1.269715    0.577916    0.632989    11.00000    0.01994    0.01918 =
         0.03635    0.00318    0.00162   -0.00605
C20   1    1.201215    0.604284    0.591846    11.00000    0.01990    0.02199 =
         0.02845   -0.00117    0.00315   -0.00438
C21   1    1.200651    0.683286    0.585966    11.00000    0.03006    0.02033 =
         0.03538    0.00273    0.00183   -0.00385
AFIX 137
H21A  2    1.150148    0.695413    0.560371    11.00000   -1.50000
H21B  2    1.287585    0.699853    0.581998    11.00000   -1.50000
H21C  2    1.163858    0.705285    0.611759    11.00000   -1.50000
AFIX   0
C22   1    1.245628    0.569395    0.550000    11.00000    0.03054    0.02309 =
         0.03321   -0.00240    0.00858   -0.00528
AFIX 137
H22A  2    1.245208    0.518709    0.553804    11.00000   -1.50000
H22B  2    1.331615    0.584993    0.543134    11.00000   -1.50000
H22C  2    1.188578    0.582080    0.526192    11.00000   -1.50000
AFIX   0
C23   1    1.258978    0.627267    0.671316    11.00000    0.03252    0.03019 =
         0.03529   -0.00037   -0.00662   -0.00453
AFIX 137
H23A  2    1.170414    0.641089    0.675118    11.00000   -1.50000
H23B  2    1.310713    0.668737    0.665914    11.00000   -1.50000
H23C  2    1.288876    0.603842    0.697664    11.00000   -1.50000
AFIX   0
C24   1    1.406227    0.555247    0.626463    11.00000    0.01825    0.03201 =
         0.05574    0.00291   -0.00046   -0.00359
AFIX 137
H24A  2    1.440102    0.537313    0.653897    11.00000   -1.50000
H24B  2    1.456822    0.595213    0.616949    11.00000   -1.50000
H24C  2    1.409746    0.518603    0.604337    11.00000   -1.50000
AFIX   0
C25   1    0.954317    0.409680    0.553249    11.00000    0.02667    0.02505 =
         0.01938   -0.00456    0.00039   -0.00024
AFIX  13
H25   2    1.030022    0.415499    0.572385    11.00000   -1.20000
AFIX   0
C26   1    0.957532    0.469663    0.520340    11.00000    0.02573    0.03479 =
         0.02210   -0.00173    0.00672    0.00128
AFIX 137
H26A  2    1.034512    0.466228    0.502733    11.00000   -1.50000
H26B  2    0.956977    0.514243    0.535848    11.00000   -1.50000
H26C  2    0.883158    0.466833    0.501420    11.00000   -1.50000
AFIX   0
C27   1    0.972467    0.341095    0.528614    11.00000    0.04466    0.02985 =
         0.03038   -0.00925    0.00477    0.00769
AFIX 137
H27A  2    0.902605    0.334676    0.508077    11.00000   -1.50000
H27B  2    0.973662    0.302285    0.549286    11.00000   -1.50000
H27C  2    1.052747    0.342436    0.512715    11.00000   -1.50000
AFIX   0
C28   1    0.756573    0.318250    0.635626    11.00000    0.03242    0.01661 =
         0.02250   -0.00055   -0.00675   -0.00326
C29   1    0.802536    0.255905    0.661238    11.00000    0.03424    0.02529 =
         0.04097    0.00878   -0.00874   -0.00862
AFIX 137
H29A  2    0.770939    0.258893    0.691099    11.00000   -1.50000
H29B  2    0.895245    0.255395    0.661510    11.00000   -1.50000
H29C  2    0.771187    0.213056    0.647691    11.00000   -1.50000
AFIX   0
SI2   5    0.240160   -0.070056    0.622696    11.00000    0.02119    0.01519 =
         0.02219   -0.00091   -0.00017   -0.00017
O5    4    0.226271    0.014841    0.625806    11.00000    0.02511    0.01384 =
         0.02034    0.00149    0.00048   -0.00113
O6    4    0.149410    0.287837    0.618554    11.00000    0.03382    0.02181 =
         0.02940    0.00149   -0.00226    0.00307
N2    6    0.350992    0.276800    0.644837    11.00000    0.02726    0.01298 =
         0.02433   -0.00050    0.00156    0.00107
H2N   2    0.433036    0.289866    0.642078    11.00000    0.03259
O7    4    0.711174    0.102724    0.609631    11.00000    0.01804    0.02088 =
         0.03122    0.00212   -0.00020   -0.00190
O8    4    0.583711    0.039317    0.654865    11.00000    0.01580    0.01911 =
         0.03207    0.00298   -0.00066    0.00154
B2    3    0.594406    0.095810    0.627475    11.00000    0.02361    0.02049 =
         0.01853   -0.00419    0.00077   -0.00266
C30   1    0.231219   -0.178105    0.684712    11.00000    0.04063    0.02052 =
         0.03318    0.00628   -0.00132   -0.00300
AFIX 137
H30A  2    0.306759   -0.197316    0.670673    11.00000   -1.50000
H30B  2    0.155378   -0.195988    0.670191    11.00000   -1.50000
H30C  2    0.229992   -0.191948    0.715341    11.00000   -1.50000
AFIX   0
C31   1    0.233629   -0.097844    0.681452    11.00000    0.03155    0.01853 =
         0.01990    0.00428   -0.00006   -0.00040
C32   1    0.247846    0.063166    0.590928    11.00000    0.02910    0.01785 =
         0.01606   -0.00143   -0.00146    0.00115
AFIX  23
H32A  2    0.180530    0.058303    0.568781    11.00000   -1.20000
H32B  2    0.330200    0.053188    0.576934    11.00000   -1.20000
AFIX   0
C33   1    0.247788    0.136594    0.608956    11.00000    0.02650    0.01270 =
         0.01664    0.00186    0.00004   -0.00034
AFIX  23
H33A  2    0.167124    0.145354    0.624355    11.00000   -1.20000
H33B  2    0.254451    0.170381    0.584775    11.00000   -1.20000
AFIX   0
C34   1    0.358985    0.147135    0.640450    11.00000    0.02214    0.01501 =
         0.01721    0.00132   -0.00027    0.00361
AFIX  13
H34   2    0.360444    0.105295    0.659790    11.00000   -1.20000
AFIX   0
C35   1    0.342996    0.212266    0.671125    11.00000    0.02744    0.00991 =
         0.02063    0.00144   -0.00068    0.00180
C36   1    0.221913    0.210596    0.697599    11.00000    0.02227    0.02069 =
         0.01709   -0.00143   -0.00338    0.00335
C37   1    0.166039    0.272215    0.713153    11.00000    0.03359    0.02081 =
         0.02108    0.00022   -0.00085    0.00317
AFIX  43
H37   2    0.201662    0.315881    0.705324    11.00000   -1.20000
AFIX   0
C38   1    0.060301    0.270608    0.739611    11.00000    0.03775    0.02808 =
         0.02448   -0.00201    0.00304    0.00998
AFIX  43
H38   2    0.024316    0.312986    0.749677    11.00000   -1.20000
AFIX   0
C39   1    0.006758    0.207901    0.751477    11.00000    0.02566    0.04329 =
         0.02054    0.00015    0.00355    0.00528
AFIX  43
H39   2   -0.066428    0.206999    0.769376    11.00000   -1.20000
AFIX   0
C40   1    0.060479    0.146264    0.737106    11.00000    0.02731    0.02599 =
         0.02357   -0.00105   -0.00082   -0.00290
AFIX  43
H40   2    0.024517    0.102916    0.745425    11.00000   -1.20000
AFIX   0
C41   1    0.167060    0.147585    0.710495    11.00000    0.02497    0.01960 =
         0.02499   -0.00302    0.00145   -0.00038
AFIX  43
H41   2    0.203127    0.104928    0.700936    11.00000   -1.20000
AFIX   0
C42   1    0.349576   -0.070514    0.705736    11.00000    0.03900    0.03268 =
         0.02807    0.00757   -0.01102   -0.00982
AFIX 137
H42A  2    0.353099   -0.019661    0.703199    11.00000   -1.50000
H42B  2    0.426311   -0.090827    0.693139    11.00000   -1.50000
H42C  2    0.343655   -0.083530    0.736442    11.00000   -1.50000
AFIX   0
C43   1    0.113909   -0.069350    0.702851    11.00000    0.04060    0.02809 =
         0.02535    0.00146    0.00721    0.00252
AFIX 137
H43A  2    0.112118   -0.083260    0.733465    11.00000   -1.50000
H43B  2    0.039327   -0.088112    0.687997    11.00000   -1.50000
H43C  2    0.113497   -0.018403    0.700816    11.00000   -1.50000
AFIX   0
C44   1    0.106970   -0.108923    0.590883    11.00000    0.02834    0.02555 =
         0.03100    0.00009   -0.00895    0.00070
AFIX 137
H44A  2    0.027415   -0.102205    0.606681    11.00000   -1.50000
H44B  2    0.122222   -0.158854    0.586812    11.00000   -1.50000
H44C  2    0.101488   -0.086073    0.562486    11.00000   -1.50000
AFIX   0
C45   1    0.390895   -0.093889    0.595645    11.00000    0.02374    0.03159 =
         0.03016   -0.00130    0.00176    0.00121
AFIX 137
H45A  2    0.387043   -0.080608    0.564945    11.00000   -1.50000
H45B  2    0.404152   -0.144279    0.597975    11.00000   -1.50000
H45C  2    0.461116   -0.069371    0.609725    11.00000   -1.50000
AFIX   0
C46   1    0.484750    0.147560    0.616277    11.00000    0.02522    0.01609 =
         0.01609   -0.00368   -0.00026   -0.00345
C47   1    0.506753    0.189533    0.582478    11.00000    0.02521    0.02227 =
         0.02407   -0.00147    0.00172    0.00311
AFIX  93
H47A  2    0.442745    0.220558    0.572731    11.00000   -1.20000
H47B  2    0.586400    0.188339    0.568202    11.00000   -1.20000
AFIX   0
C48   1    0.781755    0.039370    0.619957    11.00000    0.01846    0.02098 =
         0.03246   -0.00267   -0.00544    0.00298
C49   1    0.712362    0.013417    0.661280    11.00000    0.02038    0.02312 =
         0.03320    0.00096   -0.00285    0.00118
C50   1    0.919650    0.059098    0.626692    11.00000    0.02027    0.03428 =
         0.03800   -0.00082    0.00206    0.00034
AFIX 137
H50A  2    0.954493    0.077446    0.599509    11.00000   -1.50000
H50B  2    0.967700    0.017806    0.635537    11.00000   -1.50000
H50C  2    0.925654    0.094759    0.649371    11.00000   -1.50000
AFIX   0
C51   1    0.766947   -0.008757    0.581162    11.00000    0.02185    0.03606 =
         0.03942   -0.00736    0.00317    0.00378
AFIX 137
H51A  2    0.677529   -0.020982    0.577595    11.00000   -1.50000
H51B  2    0.816528   -0.051217    0.585919    11.00000   -1.50000
H51C  2    0.797226    0.014862    0.554933    11.00000   -1.50000
AFIX   0
C52   1    0.708084   -0.065433    0.666044    11.00000    0.01982    0.02588 =
         0.05152    0.00720   -0.00134    0.00064
AFIX 137
H52A  2    0.665761   -0.077600    0.693325    11.00000   -1.50000
H52B  2    0.794502   -0.083926    0.666259    11.00000   -1.50000
H52C  2    0.661232   -0.085565    0.641617    11.00000   -1.50000
AFIX   0
C53   1    0.760784    0.046214    0.703344    11.00000    0.02719    0.03188 =
         0.03197    0.00415    0.00137    0.00316
AFIX 137
H53A  2    0.765226    0.096907    0.699900    11.00000   -1.50000
H53B  2    0.845235    0.027984    0.709931    11.00000   -1.50000
H53C  2    0.702937    0.034778    0.727171    11.00000   -1.50000
AFIX   0
C54   1    0.459880    0.215873    0.702917    11.00000    0.02998    0.02432 =
         0.02086   -0.00221   -0.00200   -0.00239
AFIX  13
H54   2    0.537884    0.214903    0.684551    11.00000   -1.20000
AFIX   0
C55   1    0.466962    0.152991    0.733663    11.00000    0.03607    0.02976 =
         0.02222   -0.00227   -0.00879    0.00300
AFIX 137
H55A  2    0.543979    0.156127    0.751274    11.00000   -1.50000
H55B  2    0.468673    0.109916    0.716592    11.00000   -1.50000
H55C  2    0.392753    0.152809    0.752741    11.00000   -1.50000
AFIX   0
C56   1    0.465374    0.282927    0.730255    11.00000    0.04504    0.02584 =
         0.02561   -0.00559   -0.00417   -0.00717
AFIX 137
H56A  2    0.392336    0.284549    0.749832    11.00000   -1.50000
H56B  2    0.463730    0.323539    0.710980    11.00000   -1.50000
H56C  2    0.543556    0.283386    0.747360    11.00000   -1.50000
AFIX   0
C57   1    0.260944    0.306549    0.620053    11.00000    0.03217    0.01519 =
         0.02393    0.00137    0.00616   -0.00030
C58   1    0.306549    0.368566    0.594092    11.00000    0.03357    0.02231 =
         0.04224    0.00753    0.00790    0.00612
AFIX 137
H58A  2    0.280259    0.363363    0.563746    11.00000   -1.50000
H58B  2    0.399038    0.371198    0.595601    11.00000   -1.50000
H58C  2    0.269891    0.411312    0.606110    11.00000   -1.50000
AFIX   0
HKLF 4

REM  sad_a.res in P2(1)2(1)2(1)
REM R1 =  0.0489 for    8231 Fo > 4sig(Fo)  and  0.0776 for all   10770 data
REM    681 parameters refined using      2 restraints

END

WGHT      0.0484      1.7086

REM Highest difference peak  0.386,  deepest hole -0.393,  1-sigma level  0.062
Q1    1   0.8399  0.6991  0.6163  11.00000  0.05    0.39
Q2    1   0.6782  0.7159  0.5843  11.00000  0.05    0.33
Q3    1   0.3612 -0.0737  0.6215  11.00000  0.05    0.30
Q4    1   0.7605  0.7047  0.6399  11.00000  0.05    0.30
Q5    1   0.6630  0.7199  0.6319  11.00000  0.05    0.29
Q6    1   0.2822 -0.0982  0.5975  11.00000  0.05    0.27
Q7    1   0.5064  0.4781  0.6258  11.00000  0.05    0.27
Q8    1   1.2529  0.6790  0.6292  11.00000  0.05    0.27
Q9    1   0.5911  0.6947  0.6105  11.00000  0.05    0.27
Q10   1   0.5843  0.6197  0.6190  11.00000  0.05    0.26
Q11   1   0.2675 -0.0775  0.6575  11.00000  0.05    0.26
Q12   1   0.1959 -0.0946  0.6522  11.00000  0.05    0.26
Q13   1   0.5035  0.7033  0.5926  11.00000  0.05    0.26
Q14   1   0.1195  0.1433  0.6197  11.00000  0.05    0.25
Q15   1   0.4228  0.6954  0.6036  11.00000  0.05    0.25
Q16   1   0.7577  0.6976  0.5815  11.00000  0.05    0.25
Q17   1   0.1917 -0.1020  0.5966  11.00000  0.05    0.24
Q18   1   0.4115  0.2039  0.6837  11.00000  0.05    0.24
Q19   1   0.4251  0.6647  0.6130  11.00000  0.05    0.24
Q20   1   0.8466  0.6187  0.6058  11.00000  0.05    0.23
;
_shelx_res_checksum   39578

_shelx_hkl_file
;
   1   0   0   -6.70    0.60
   1   0   0   -5.60    0.70
   2   0   0 4431.56  175.68
   2   0   0 4268.77  175.68
   3   0   0   -1.00    1.30
   3   0   0   -0.10    1.30
   3   0   0   -0.30    1.70
   4   0   0 1483.55   62.49
   4   0   0 1582.24   62.79
   5   0   0   -0.40    2.00
   5   0   0   -1.60    1.60
   6   0   0  228.48   11.00
   6   0   0  223.38   10.80
   6   0   0  232.38   11.00
   7   0   0    0.40    2.10
   7   0   0    2.50    2.10
   9   0   0   -1.50    2.40
   9   0   0    1.50    1.70
   9   0   0    9.50    5.00
  10   0   0    1.20    5.00
  11   0   0   -0.70    3.50
  12   0   0    2.10    2.60
   0   1   0    0.00    0.40
   0  -1   0   -0.10    0.40
   0  -1   0    0.10    0.40
  -1  -1   0  666.53   27.80
   1  -1   0  727.53   27.70
   1   1   0  651.73   27.90
  -2  -1   0  227.08   10.20
   2  -1   0  240.48    9.90
   2   1   0  235.48   10.30
  -2  -1   0  235.18   10.80
   3   1   0   72.19    5.20
   3   1   0   69.69    4.30
   3  -1   0   87.29    4.60
   3   1   0   85.09    5.20
   3  -1   0   77.29    4.10
   3  -1   0   75.79    4.10
   4  -1   0    6.70    1.60
   4  -1   0    9.00    1.80
   4   1   0    6.30    2.40
   4   1   0    4.90    1.70
   5   1   0   16.20    2.70
   5  -1   0   12.20    2.30
   5   1   0   12.40    2.70
   5  -1   0   12.10    2.20
   5   1   0   12.20    2.10
   5  -1   0   14.90    2.50
   6  -1   0  248.98   11.70
   6   1   0  255.47   12.20
   6  -1   0  244.68   11.60
   6   1   0  248.38   11.60
   6  -1   0  248.68   11.50
   6   1   0  254.67   12.00
   7   1   0   23.40    3.70
   7  -1   0   16.60    2.90
   7  -1   0   34.50    3.50
   7   1   0   38.60    4.40
   8   1   0   52.39    5.00
   8  -1   0   51.99    5.00
   8   1   0   54.99    4.90
   9  -1   0  365.16   16.50
   9   1   0  310.77   17.70
   9   1   0  368.66   16.50
   9   1   0  332.77   15.10
   9  -1   0  344.77   14.50
  10  -1   0    3.40    5.10
  11  -1   0   -0.30    3.30
  11   1   0    0.70    3.70
  12  -1   0    1.60    2.50
  12   1   0    0.40    2.30
   0  -2   0  112.69    4.80
   0   2   0  100.39    4.80
   1  -2   0  171.18    7.30
  -1  -2   0  172.98    7.60
   1   2   0  173.18    7.70
  -2  -2   0  207.88    9.60
  -2  -2   0  225.18   10.50
   2  -2   0  211.08    9.10
   3  -2   0   92.79    4.50
   3  -2   0   89.99    4.80
   3   2   0   94.29    5.00
  -3  -2   0   87.09    5.20
   4  -2   0  142.19    7.00
   4   2   0  145.09    6.90
   4  -2   0  152.38    7.00
   4   2   0  142.19    7.60
   5   2   0   10.70    2.50
   5  -2   0   10.60    2.00
   5   2   0   14.00    2.60
   5   2   0    9.40    2.00
   5  -2   0   10.60    2.20
   5  -2   0   11.00    2.00
   6  -2   0  274.57   12.50
   6   2   0  284.67   13.70
   6   2   0  281.57   13.50
   6  -2   0  304.47   13.10
   6   2   0  284.57   13.00
   6  -2   0  270.47   12.80
   7  -2   0    5.80    2.50
   7   2   0    8.70    2.40
   7   2   0   17.70    3.10
   8   2   0   -0.10    2.20
   8   2   0    4.20    2.60
   8  -2   0    2.70    2.50
   9  -2   0   47.00    7.90
   9   2   0   71.29    4.80
   9  -2   0   75.79    5.80
   9   2   0   63.19    8.30
  10   2   0    2.70    4.20
  10  -2   0    3.90    4.70
  10   2   0    0.60    4.00
  10   2   0    1.80    1.70
  11   2   0   33.70    7.30
  11  -2   0    2.70    3.50
  12   2   0    2.40    2.70
   0  -3   0    0.00    1.20
   0   3   0   -1.90    1.10
  -1  -3   0 1190.98   48.50
   1   3   0 1222.58   48.60
   1  -3   0 1152.98   48.30
   2  -3   0   21.30    2.00
   2  -3   0   22.00    2.10
  -2  -3   0   32.90    4.10
   2   3   0   19.60    2.70
  -2  -3   0   22.70    3.10
  -3  -3   0   40.60    3.90
   3   3   0   46.30    4.20
   3  -3   0   39.70    2.80
   3  -3   0   44.20    2.90
  -3  -3   0   46.90    5.60
   3   3   0   41.80    2.90
   3  -3   0   40.80    3.10
   4   3   0   -1.60    1.30
   4  -3   0    2.10    1.40
   4  -3   0   -0.10    1.50
   4   3   0    1.90    2.30
   5  -3   0   27.80    2.90
   5   3   0   32.20    4.10
   5  -3   0   26.20    3.00
   5   3   0   23.80    4.00
   5  -3   0   21.90    3.50
   5   3   0   30.30    3.00
   6   3   0    1.80    2.40
   6   3   0    6.80    2.60
   6  -3   0    2.30    2.00
   6   3   0    4.60    1.90
   7   3   0    5.30    2.20
   7   3   0   12.30    3.10
   7  -3   0    1.40    2.10
   8   3   0   20.70    3.60
   8   3   0   19.00    3.30
   8  -3   0   22.10    3.50
   9   3   0   24.50    5.50
   9  -3   0   28.10    4.00
   9   3   0   18.90    3.60
   9   3   0   24.20    3.40
  10  -3   0    5.80    4.60
  10   3   0    0.40    1.90
  10   3   0    3.20    4.30
  10   3   0   -2.10    3.60
  11   3   0   11.50    4.60
  12   3   0   -0.80    2.30
   0  -4   0    1.10    1.50
   0   4   0    0.50    1.50
  -1  -4   0    9.10    2.10
   1  -4   0    7.10    1.50
   1  -4   0    7.70    1.50
   1   4   0   11.30    2.20
   2   4   0    0.90    2.20
  -2  -4   0    8.00    2.40
   2  -4   0    0.10    1.10
   2  -4   0    2.70    1.30
   2  -4   0    0.80    1.20
  -2  -4   0    1.50    2.00
   3  -4   0    6.90    1.30
   3  -4   0   12.00    2.10
   3  -4   0    9.90    1.70
   3   4   0    8.50    2.50
   3   4   0   11.00    1.60
  -3  -4   0    6.90    2.90
  -3  -4   0    7.20    2.20
   4   4   0    2.90    2.50
   4   4   0   -0.30    1.40
   4  -4   0    1.50    1.60
   4  -4   0   -1.60    1.30
   5   4   0   16.50    2.60
   5   4   0   25.40    4.20
   5  -4   0   19.40    3.10
   5  -4   0   22.40    3.20
   5   4   0   19.30    3.30
   6  -4   0    0.10    2.10
   6   4   0    1.40    1.80
   6   4   0    4.00    2.50
   6   4   0    6.90    2.80
   7   4   0    4.60    2.20
   7   4   0    5.10    2.80
   7  -4   0    1.70    2.10
   8  -4   0   12.80    3.10
   8   4   0   11.30    3.40
   9  -4   0   -0.20    2.90
   9   4   0    0.90    2.80
   9   4   0    2.20    4.70
   9   4   0    2.60    3.60
   9   4   0    0.20    2.30
   9   4   0   -0.70    2.70
  10   4   0    2.40    2.20
  10   4   0    6.00    4.40
  10   4   0   -4.10    3.10
  11   4   0   -0.10    2.70
  11   4   0    7.90    4.60
  12   4   0    1.40    4.10
  12   4   0   -0.70    2.10
   0  -5   0   -0.80    1.70
   0  -5   0    1.50    1.70
   0   5   0   -0.30    1.70
  -1  -5   0    9.40    2.10
   1   5   0    7.30    2.20
   1  -5   0    7.00    1.70
   1  -5   0    7.60    1.80
   2   5   0   32.20    4.10
   2  -5   0   30.80    2.60
  -2  -5   0   31.00    3.90
   2  -5   0   28.70    2.70
  -2  -5   0   43.80    6.40
   3  -5   0    3.80    1.30
  -3  -5   0    4.20    3.10
   3  -5   0    6.30    1.70
   3   5   0    4.50    1.40
   3   5   0    3.70    2.50
   3  -5   0    5.50    1.40
   4   5   0    1.50    2.50
   4  -5   0    1.70    1.40
   4  -5   0    0.20    1.70
   4   5   0    1.40    2.40
   4   5   0    1.80    1.40
   5   5   0   48.40    3.60
   5   5   0   49.00    5.40
   5  -5   0   51.09    3.80
   5   5   0   41.80    5.00
   5  -5   0   51.49    3.70
   6  -5   0   48.10    4.30
   6   5   0   44.20    3.90
   6   5   0   41.80    5.10
   6   5   0   54.99    5.80
   7  -5   0    0.00    2.10
   7   5   0    5.80    3.00
   8   5   0    5.10    3.20
   8  -5   0    2.10    2.60
   9   5   0    9.50    2.80
   9   5   0   13.00    5.10
   9   5   0    7.90    3.20
   9   5   0    9.40    3.20
   9   5   0   -0.30    3.10
   9  -5   0    6.40    3.80
  10   5   0    4.10    4.10
  10   5   0    0.80    3.50
  10   5   0    3.10    3.30
  10   5   0    6.60    2.40
  11   5   0    4.60    4.30
  11   5   0   -0.90    2.60
  12   5   0   -0.80    3.70
  12   5   0   -0.60    2.10
   0   6   0   37.10    4.40
   0  -6   0   45.30    3.80
  -1  -6   0   61.79    4.70
   1   6   0   57.49    4.70
   1  -6   0   68.29    4.30
   2  -6   0   -0.10    1.30
   2   6   0   -0.40    1.20
   2  -6   0   -0.20    1.00
   2   6   0   -0.90    2.20
  -2  -6   0   -1.90    3.00
  -2  -6   0    1.30    2.20
   3   6   0   10.90    1.70
   3  -6   0   13.50    2.00
   3  -6   0   10.70    1.80
   3   6   0   11.20    3.10
  -3  -6   0   14.30    4.00
   4  -6   0    4.70    1.80
   4   6   0    7.20    3.10
   4   6   0    4.50    1.60
   4   6   0    6.90    2.80
   4  -6   0    3.90    1.50
  -4  -6   0    4.20    3.00
   5   6   0    9.40    3.20
   5  -6   0   13.50    1.90
   5   6   0   13.40    2.20
   5   6   0   12.30    3.20
   5  -6   0   14.50    2.50
   6   6   0  121.69    8.70
   6  -6   0  140.99    7.40
   6   6   0  137.89    8.90
   7   6   0    8.70    3.30
   7  -6   0    5.10    2.60
   8  -6   0    7.90    2.90
   8  -6   0    2.70    4.80
   8   6   0    5.10    3.20
   9   6   0    1.50    3.10
   9   6   0    2.40    3.20
   9   6   0    2.10    2.70
   9   6   0    3.80    4.50
   9  -6   0   -0.70    3.40
   9   6   0    0.70    3.20
  10   6   0    4.80    2.50
  10   6   0    0.70    2.80
  10   6   0    9.10    3.10
  10   6   0   12.10    4.70
  11   6   0    8.00    4.20
  11   6   0   -0.80    2.60
  11   6   0    2.60    1.50
  12   6   0   -0.10    2.00
  12   6   0   -3.80    3.40
   1   7   0    7.10    1.50
   1  -7   0   12.50    2.30
  -1  -7   0   11.80    2.60
  -2  -7   0   44.10    9.10
   2  -7   0   44.70    3.10
   2   7   0   37.20    2.80
   2  -7   0   47.70    3.30
  -2  -7   0   56.09    4.80
  -3  -7   0  436.86   21.50
   3  -7   0  418.66   17.90
   3  -7   0  423.26   17.80
   3   7   0  395.26   17.70
   4   7   0    6.40    3.20
   4  -7   0    9.00    2.00
  -4  -7   0    6.70    4.00
   4  -7   0    9.00    1.70
   5   7   0   41.10    5.80
   5  -7   0   35.20    2.90
   5  -7   0   43.10    3.60
   6  -7   0   46.10    4.10
   6   7   0   41.40    6.10
   7  -7   0   54.29    5.10
   7   7   0   50.79    6.90
   8  -7   0   15.40    3.40
   8   7   0   18.20    3.60
   8   7   0   22.90    4.20
   8  -7   0   10.70    4.50
   8   7   0   14.80    3.70
   9   7   0   10.20    4.40
   9   7   0    6.40    2.90
   9   7   0    1.10    3.00
   9  -7   0    1.90    3.50
   9   7   0    4.90    3.40
   9   7   0    6.30    3.20
  10   7   0   48.90    7.70
  10   7   0   68.59    5.20
  10  -7   0   63.39    6.50
  10   7   0   56.69    6.30
  11   7   0   33.10    6.50
  11   7   0   34.70    3.20
   0  -8   0  980.90   41.00
   1   8   0   -0.90    1.20
  -1  -8   0   -5.40    4.40
  -1  -8   0    2.40    2.40
   1  -8   0    0.10    2.00
  -2  -8   0   65.39    5.30
   2  -8   0   72.59    4.40
  -2  -8   0   55.39    8.70
   2   8   0   50.19    3.50
   2  -8   0   71.49    4.70
  -3  -8   0  505.75   22.40
   3  -8   0  512.45   21.40
  -3  -8   0  532.45   25.00
   3  -8   0  522.75   21.40
   3  -8   0  452.55   21.00
   4   8   0  105.59    7.80
  -4  -8   0  107.39   11.30
   4  -8   0  100.09    5.30
   4  -8   0  103.59    5.70
   5   8   0   49.60    6.30
   5  -8   0   47.00    2.70
   5  -8   0   45.20    4.20
   6   8   0  131.49    9.50
   6  -8   0  132.79    7.60
   7   8   0   96.59    8.80
   8   8   0   43.20    5.60
   8   8   0   64.19    7.30
   8  -8   0   51.99    5.30
   8   8   0   40.10    6.60
   8  -8   0   52.59    6.90
   9   8   0    7.40    3.30
   9   8   0   10.70    3.80
   9   8   0    0.90    2.90
   9  -8   0    6.80    3.80
   9   8   0    6.80    3.00
   9   8   0   17.30    4.80
  10   8   0   10.10    4.50
  10   8   0    5.90    3.20
  10  -8   0    5.80    3.60
  10   8   0    0.00    2.70
  10   8   0    3.60    2.50
  11   8   0    0.80    1.90
  11   8   0    4.30    3.90
  11   8   0    7.40    1.90
   0  -9   0    0.90    1.90
   0  -9   0    0.80    2.20
   1  -9   0  119.59    6.90
  -1  -9   0  132.99    7.40
   1   9   0  119.19    6.20
  -1  -9   0  123.49    6.10
   1  -9   0  146.69    7.30
  -1  -9   0  132.69    7.60
  -2  -9   0   38.20    4.90
  -2  -9   0   39.70    6.40
  -2  -9   0   43.60    5.00
   2  -9   0   42.60    3.80
   2  -9   0   41.50    3.80
   3  -9   0    1.20    1.60
   3  -9   0    2.00    1.40
  -3  -9   0    2.00    3.90
  -3  -9   0    2.20    2.60
  -4  -9   0    1.40    3.80
   4  -9   0   -0.60    1.80
   4  -9   0   -0.40    1.30
   4   9   0   -1.70    2.80
   5  -9   0   24.80    3.60
   5   9   0   20.60    4.40
   6   9   0   68.59    7.80
   6  -9   0   54.39    4.90
   7   9   0   38.00    5.80
   7  -9   0   37.90    4.70
   8   9   0   64.79    7.40
   8  -9   0   67.99    7.20
   8   9   0   72.99    8.30
   8   9   0   55.99    7.90
   8   9   0   70.19    6.70
   9  -9   0   51.09    6.70
   9   9   0   49.50    7.60
   9   9   0   47.90    5.50
   9   9   0   66.29    7.40
   9   9   0   51.09    6.80
  10   9   0    4.60    3.10
  10   9   0    1.70    2.40
  10  -9   0    0.90    3.10
  10   9   0   -0.40    2.40
  10   9   0    3.40    4.10
  11   9   0   21.00    4.60
  11   9   0   20.40    2.90
   0 -10   0  380.06   16.00
   0 -10   0  375.36   17.30
   0 -10   0  369.26   16.90
  -1 -10   0   17.90    2.30
   1 -10   0   16.40    2.90
  -1 -10   0   10.10    2.70
   1 -10   0   15.30    2.30
  -1 -10   0   18.10    3.10
   1 -10   0   15.70    2.60
  -2 -10   0  342.37   16.60
  -2 -10   0  290.97   24.70
   2 -10   0  354.66   15.70
   2 -10   0  337.57   15.40
  -2 -10   0  361.76   16.40
  -2 -10   0  362.86   15.10
   3 -10   0    0.90    1.70
  -3 -10   0   -1.10    3.80
  -3 -10   0    4.00    3.10
   3 -10   0    0.30    1.40
   4 -10   0  184.38    8.50
  -4 -10   0  172.78   11.40
   5  10   0   44.90    7.00
   5 -10   0   34.80    3.90
   6  10   0    9.70    4.20
   6 -10   0    0.60    2.50
   7  10   0    5.60    4.10
   7 -10   0    3.60    4.10
   7  10   0    0.10    3.50
   7  10   0    5.60    3.50
   7 -10   0    0.80    2.60
   8  10   0   10.20    3.70
   8  10   0   21.40    5.00
   8  10   0   19.20    5.30
   8 -10   0   14.70    4.70
   9  10   0   73.09    7.30
   9  10   0   51.89    7.80
   9 -10   0   66.09    7.10
   9  10   0   59.49    6.00
  10  10   0   54.59    4.90
  10  10   0   57.59    7.70
  10 -10   0   60.79    6.10
  10  10   0   69.49    6.50
  11  10   0   14.20    2.50
  11  10   0   13.10    2.40
  11  10   0    7.00    2.80
  11  10   0    7.80    3.30
   0 -11   0   -1.70    2.20
   0 -11   0    0.10    2.30
   0 -11   0    1.50    1.70
  -1 -11   0   73.89    4.40
   1 -11   0   70.09    5.40
   1 -11   0   66.09    4.00
   1 -11   0   72.09    5.50
  -1 -11   0   63.39    5.80
  -1 -11   0   72.39    5.90
  -2 -11   0   23.20    2.70
   2 -11   0   17.20    2.60
  -2 -11   0   11.80    3.20
  -2 -11   0   14.50    4.80
   2 -11   0   13.00    2.50
   3 -11   0    5.00    1.90
  -3 -11   0    5.10    4.30
  -3 -11   0    6.40    3.40
  -3 -11   0    6.50    2.20
   3 -11   0    8.20    1.80
  -4 -11   0   24.30    4.80
  -4 -11   0   16.50    2.70
   5  11   0    6.10    4.10
  -5 -11   0    3.40    2.40
   6  11   0    7.70    4.10
  -6 -11   0    3.70    2.40
   7  11   0   35.80    7.00
   7  11   0   33.50    5.00
  -7 -11   0   31.90    4.20
   7  11   0   37.60    6.00
   7 -11   0   27.40    5.40
   8  11   0    5.70    4.70
   8  11   0    6.60    4.30
   8  11   0    5.70    3.50
   8 -11   0    8.70    4.40
   8  11   0   -1.80    2.70
   9  11   0    4.90    4.60
   9 -11   0   11.20    3.90
   9  11   0   -0.40    2.40
   9  11   0    5.30    3.00
   9  11   0   11.60    3.90
  10 -11   0   28.70    4.80
  10  11   0   34.30    5.40
  10  11   0   18.30    4.10
  10  11   0   23.20    4.00
  11  11   0    2.70    2.50
  11  11   0    3.90    1.40
  11  11   0    0.00    1.40
  11  11   0    4.10    2.90
   0 -12   0    5.30    1.90
   0 -12   0    5.90    2.70
   0 -12   0    6.20    2.60
  -1 -12   0    1.30    2.60
  -1 -12   0    2.40    2.80
   1 -12   0    2.40    2.30
   1 -12   0    3.20    2.30
   1 -12   0    0.40    1.60
  -1 -12   0    1.50    1.90
  -2 -12   0   10.70    3.20
   2 -12   0    9.40    2.30
  -2 -12   0   12.80    2.50
  -3 -12   0   12.10    2.50
  -3 -12   0    3.10    3.30
  -4 -12   0    1.60    3.50
  -4 -12   0    1.90    2.40
  -5 -12   0    2.10    2.40
  -6 -12   0    2.70    2.50
   6  12   0   -0.30    4.00
   6  12   0    4.60    4.60
   6  12   0    3.00    3.50
   6 -12   0   -2.70    3.80
   7  12   0    9.90    3.80
   7  12   0   17.00    4.70
  -7 -12   0   14.80    2.90
   7  12   0    7.90    5.10
   7 -12   0    7.10    4.40
   7  12   0   -0.20    3.10
   8  12   0    5.90    4.30
   8  12   0    3.70    3.50
   8 -12   0    2.00    4.10
   8  12   0   -1.10    2.60
   8  12   0   -2.50    4.30
   9  12   0    8.30    4.40
   9  12   0    0.30    2.60
   9  12   0    5.10    3.50
   9 -12   0    4.70    3.40
   9  12   0    0.20    2.40
  10  12   0    2.10    2.60
  10  12   0    0.90    2.20
  10  12   0    0.70    1.80
  10 -12   0    1.10    2.70
  10  12   0    5.30    2.90
   0 -13   0    1.20    2.50
   0 -13   0    1.20    1.90
  -1 -13   0  111.49    8.30
   1 -13   0  107.49    7.20
   1 -13   0  107.09    5.90
  -1 -13   0  120.89    6.10
   2 -13   0    2.80    2.10
  -2 -13   0    3.90    2.20
  -2 -13   0   -1.80    3.20
  -3 -13   0   -1.60    3.20
  -3 -13   0    0.60    2.20
  -4 -13   0   17.00    3.00
  -4 -13   0   12.30    4.30
  -5 -13   0    1.20    2.50
   5 -13   0    0.60    4.00
   6  13   0    9.70    5.10
   6 -13   0    3.00    4.30
  -6 -13   0    8.30    2.80
   6  13   0    6.50    3.90
   7  13   0    0.90    3.10
   7  13   0    8.70    3.80
   7 -13   0    9.50    4.40
   7  13   0    1.70    4.60
  -7 -13   0   13.60    2.90
   8  13   0   24.70    4.50
   8  13   0   22.70    5.30
   8 -13   0   14.50    4.60
   9  13   0    8.60    3.60
   9  13   0   11.20    2.90
   9 -13   0   18.80    3.90
   9  13   0   13.30    4.40
  10  13   0   29.20    5.10
  10  13   0   38.70    4.80
  10  13   0   36.50    3.80
  10 -13   0   31.00    4.10
   0 -14   0  215.98   10.20
   0 -14   0  216.58   11.60
  -1 -14   0    5.20    3.20
  -1 -14   0    3.70    2.20
   1 -14   0    2.10    2.60
   2 -14   0   32.10    4.00
  -2 -14   0   29.50    4.80
  -2 -14   0   32.00    3.80
  -3 -14   0   21.00    4.90
  -3 -14   0   24.70    3.30
  -4 -14   0    9.80    4.30
   4 -14   0   18.20    4.60
  -4 -14   0    7.30    2.80
  -5 -14   0    0.70    2.50
   5 -14   0   -0.60    4.00
  -5 -14   0   -2.50    4.30
   5  14   0    2.30    3.90
  -6 -14   0    0.70    2.40
   6 -14   0   -0.90    4.10
   6  14   0   -1.40    3.60
   7 -14   0    4.30    4.20
   7  14   0    5.50    3.70
   7  14   0    4.90    3.90
  -7 -14   0    6.90    2.60
   8 -14   0   46.30    6.60
   8  14   0   50.29    7.30
   9  14   0   23.20    4.00
   9 -14   0   24.20    3.90
   9  14   0   29.00    4.30
   0 -15   0    2.50    2.20
   0 -15   0    0.00    2.80
  -1 -15   0   12.70    3.70
  -1 -15   0   14.50    2.70
   1 -15   0   17.00    3.30
  -2 -15   0    1.10    3.80
  -2 -15   0    2.10    2.30
   3 -15   0   53.99    7.20
   3 -15   0   59.49   10.90
  -3 -15   0   55.59    5.00
  -3 -15   0   71.69    8.30
  -4 -15   0   61.09    5.00
   4 -15   0   71.79    7.90
  -4 -15   0   69.39    8.60
  -5 -15   0   18.20    5.20
   5 -15   0   23.70    5.30
  -5 -15   0   19.20    3.20
  -6 -15   0   11.40    2.80
   6 -15   0    6.50    4.10
   6  15   0    6.20    3.90
   7 -15   0   42.70    6.90
   7  15   0   38.20    6.90
   8 -15   0  117.59    8.50
   8  15   0  121.29    9.20
   9 -15   0   -0.20    2.50
   9  15   0    7.60    3.40
   9  15   0    1.60    2.40
   0 -16   0  154.08    9.20
   0 -16   0  140.89    7.40
   0 -16   0  127.49    8.80
   0 -16   0  134.59    9.60
   1 -16   0    0.50    3.80
  -1 -16   0    6.30    3.40
   1 -16   0    3.30    4.70
  -1 -16   0    6.20    2.60
   1 -16   0    2.50    2.60
  -1 -16   0    6.90    3.50
   1 -16   0    2.90    2.60
   1 -16   0    1.70    3.10
  -1 -16   0    2.80    4.50
   2 -16   0  221.28   13.20
  -2 -16   0  249.28   11.30
  -2 -16   0  241.28   13.50
   2 -16   0  234.38   10.90
   2 -16   0  224.28   15.10
  -2 -16   0  212.58   12.30
  -3 -16   0   -4.60    3.90
   3 -16   0   -3.10    4.60
   3 -16   0    3.60    1.20
   3 -16   0    6.80    6.60
   3 -16   0   -4.10    3.70
  -3 -16   0   -0.20    2.50
   4 -16   0  162.58   10.90
  -4 -16   0  166.68    8.70
   5 -16   0   10.30    4.50
  -5 -16   0   10.20    2.80
  -5 -16   0    9.40    4.40
   6 -16   0  115.79    9.30
   6  16   0  106.59    9.80
  -6 -16   0  109.19    6.70
   7  16   0   36.70    7.00
   7 -16   0   34.90    6.30
   8  16   0   40.80    6.60
   8 -16   0   30.20    4.80
   0 -17   0    0.80    3.80
   0 -17   0   -1.30    3.40
   0 -17   0    0.00    2.80
   0 -17   0   -0.30    4.50
   0 -17   0   -0.10    3.00
   0 -17   0   -0.50    2.30
   1 -17   0   15.80    3.00
  -1 -17   0   15.10    3.90
   1 -17   0   24.80    4.90
   1 -17   0   10.60    5.10
  -1 -17   0   18.40    3.80
  -1 -17   0   17.60    3.00
   1 -17   0   17.90    3.10
  -2 -17   0   79.79    5.60
   2 -17   0   73.99    4.90
   2 -17   0   64.39    7.50
  -2 -17   0   64.29    7.00
  -2 -17   0   86.59    8.40
   2 -17   0   75.69    9.80
   3 -17   0   10.00    4.30
   3 -17   0   -2.90    6.20
  -3 -17   0   23.20    5.00
  -3 -17   0   24.20    3.80
  -4 -17   0   -0.30    2.50
   4 -17   0   -0.70    3.60
  -4 -17   0    2.20    4.40
   4 -17   0    2.20    7.10
   5 -17   0    6.50    4.10
  -5 -17   0   11.90    2.70
   6 -17   0    2.40    4.00
   6  17   0   -1.50    4.00
   7  17   0   71.19    7.40
   7 -17   0   68.29    6.90
   8 -17   0   24.90    4.00
   8  17   0   30.90    5.90
   0 -18   0   13.30    3.50
   0 -18   0   34.80    4.80
   0 -18   0   36.90    5.10
  -1 -18   0    0.50    4.70
  -1 -18   0    0.40    3.00
   1 -18   0    1.80    2.40
   1 -18   0   -3.80    3.40
   1 -18   0    3.70    4.50
  -1 -18   0    3.60    3.40
  -1 -18   0    0.20    2.40
   1 -18   0   -0.70    3.60
  -2 -18   0    0.60    3.50
  -2 -18   0   -3.00    4.70
   2 -18   0    1.50    3.60
  -2 -18   0    3.90    3.40
   2 -18   0    4.40    1.70
  -2 -18   0   10.10    2.80
   2 -18   0   -7.10    4.50
  -3 -18   0    3.20    4.20
  -3 -18   0   14.30    2.90
   3 -18   0   -2.60    6.10
   3 -18   0   11.40    4.20
  -3 -18   0    8.10    4.10
   4 -18   0   21.00    4.90
  -4 -18   0   22.20    3.20
   5 -18   0   -0.60    3.50
   6 -18   0    9.40    3.80
   6  18   0   -0.80    4.50
   7  18   0   11.40    4.00
   7 -18   0    4.00    3.10
   0 -19   0    0.50    2.60
   0 -19   0   -2.20    3.80
   0 -19   0   -1.10    3.50
   1 -19   0   -2.10    1.90
  -1 -19   0    3.70    2.50
  -1 -19   0    3.90    3.20
  -1 -19   0   -1.10    4.00
   1 -19   0   -1.90    3.50
   1 -19   0   -1.40    3.50
   2 -19   0    0.90    3.60
  -2 -19   0   -1.10    3.80
   2 -19   0   -2.40    4.30
  -2 -19   0    0.00    2.50
  -2 -19   0   -1.60    3.30
   3 -19   0   -6.20    5.80
  -3 -19   0    3.00    3.70
   3 -19   0    7.80    3.70
  -4 -19   0   20.80    4.50
   4 -19   0    3.50    7.00
   4 -19   0   18.50    4.20
   5 -19   0    1.10    3.40
   6 -19   0    2.80    3.10
   7  19   0   11.40    4.70
   0 -20   0   -1.30    3.50
   0 -20   0    2.90    2.30
   1 -20   0   -0.50    3.50
   1 -20   0    2.20    1.40
  -1 -20   0   -2.60    3.40
   1 -20   0   -3.40    3.20
  -1 -20   0    2.60    2.70
  -2 -20   0    0.20    3.40
  -2 -20   0    5.70    3.20
   2 -20   0    3.90    3.30
   2 -20   0    0.10    4.00
   3 -20   0   -3.00    5.50
   3 -20   0   -2.30    2.90
  -3 -20   0    2.20    3.20
   4 -20   0    0.90    5.80
  -4 -20   0    0.60    3.10
   4 -20   0   -1.70    2.80
   5 -20   0    2.60    2.60
  -5 -20   0    1.50    2.80
  -6 -20   0    6.00    3.40
   6 -20   0    1.10    2.40
   0 -21   0   -3.60    3.30
   0 -21   0   -0.60    1.50
  -1 -21   0    0.00    3.40
   1 -21   0    1.70    2.50
  -1 -21   0    2.40    2.20
   1 -21   0   -3.40    3.50
  -2 -21   0    1.70    3.70
  -2 -21   0    6.00    2.70
   2 -21   0   -4.90    4.00
   2 -21   0    2.90    2.60
   3 -21   0   -1.10    2.40
  -3 -21   0    3.80    2.70
   3 -21   0   -0.90    5.10
  -4 -21   0   -1.20    2.50
   4 -21   0    7.80    6.10
   4 -21   0   -0.90    2.10
   0 -22   0  149.29   13.50
  -1 -22   0    1.80    3.30
   2 -22   0   -2.50    3.80
  -2 -22   0   16.40    2.70
  -2 -22   0   -1.90    3.40
   2 -22   0    4.40    2.00
   3 -22   0    2.40    4.10
   3 -22   0   -1.40    1.60
  -3 -22   0    1.60    2.10
   0   0   1    0.40    0.20
   0   0  -1    0.30    0.20
  -1   0  -1    2.70    0.80
   1   0   1    2.30    0.90
   1   0  -1    0.90    0.50
   2   0   1  230.88   10.20
   2   0  -1  234.28   10.10
   2   0   1  242.48   10.30
   2   0  -1  248.28   10.20
   3   0   1   -1.10    1.40
   3   0  -1   -3.90    1.50
   3   0  -1   -1.40    1.40
   3   0   1    1.30    1.60
   3   0  -1    2.40    1.30
   4   0  -1  239.58   10.60
   4   0   1  229.38   10.40
   4   0   1  241.68   11.10
   5   0   1    3.70    2.20
   5   0  -1    2.10    1.90
   5   0  -1    2.20    1.80
   5   0   1    2.40    1.70
   5   0   1    1.60    2.50
   5   0  -1    2.40    1.80
   6   0   1  234.78   10.90
   6   0  -1  217.38   10.90
   6   0   1  232.58   11.30
   6   0  -1  238.68   11.10
   6   0   1  231.58   11.20
   6   0  -1  232.08   11.00
   7   0   1   -1.90    2.00
   7   0  -1    7.30    2.10
   7   0   1    0.90    2.20
   7   0  -1    1.30    2.10
   8   0   1  375.86   16.90
   8   0   1  382.06   17.50
   9   0  -1   21.20    3.50
   9   0  -1   23.70    2.80
   9   0   1   17.90    3.20
   9   0  -1   11.40    5.50
   9   0   1    7.80    4.40
   9   0   1   17.50    3.10
  10   0   1   -0.10    4.40
  10   0  -1    3.50    5.00
  11   0   1   -3.10    2.90
  11   0  -1   -0.80    3.10
  12   0  -1    0.10    2.40
  12   0   1    1.20    2.60
   0  -1  -1  166.88    6.60
   0  -1  -1  159.38    6.60
   0   1  -1  156.28    6.70
   0  -1   1  153.88    6.70
   1  -1   1  189.88    7.40
   1   1  -1  169.48    7.50
   1  -1   1  176.88    7.40
  -1  -1  -1  167.08    7.50
   1  -1  -1  164.68    7.10
   1   1   1  164.28    7.50
  -1  -1   1  168.98    7.40
   1  -1  -1  184.28    7.10
   2   1  -1  406.36   16.90
   2  -1   1  396.66   16.90
  -2  -1  -1  395.76   17.00
   2  -1   1  408.16   16.80
   2   1  -1  403.76   17.00
   2  -1  -1  405.86   16.60
   2   1   1  409.06   17.10
  -2  -1   1  410.76   17.50
   3  -1   1  151.18    6.70
   3   1  -1  142.19    6.90
   3  -1   1  137.59    6.80
  -3  -1  -1  133.29    7.10
   3   1  -1  146.09    7.10
   3  -1   1  149.29    7.00
   3   1  -1  144.49    6.70
   3  -1  -1  151.28    6.60
   3   1   1  148.29    7.30
   3  -1  -1  145.59    6.70
   4  -1   1   21.50    2.40
   4   1  -1   18.40    3.30
   4  -1   1   23.10    3.30
   4   1  -1   18.70    2.40
   4  -1  -1   18.60    2.50
   4   1   1   21.50    3.00
   4  -1  -1   18.00    2.60
   4   1   1   19.60    2.50
   5  -1   1   24.20    2.90
   5   1  -1   18.70    2.50
   5   1  -1   21.90    2.80
   5  -1   1   20.90    3.80
   5  -1   1   23.20    2.90
   5   1  -1   23.50    3.60
   5  -1  -1   19.40    2.80
   5   1   1   19.40    2.70
   5  -1  -1   21.40    2.80
   5  -1  -1   18.10    3.10
   5   1   1   23.30    4.00
   6   1  -1  188.28    9.40
   6   1  -1  189.18    9.60
   6  -1   1  192.28    9.30
   6   1  -1  192.18    9.70
   6  -1   1  198.98    9.50
   6  -1  -1  183.98    9.30
   6   1   1  189.48    9.90
   6   1   1  183.68    9.20
   6  -1  -1  188.38    9.00
   6   1   1  197.28    9.90
   6  -1  -1  186.08    9.20
   7   1  -1  131.39    7.30
   7  -1   1  120.49    7.10
   7  -1   1  123.99    6.90
   7   1  -1  118.89    7.10
   7   1   1  130.19    7.70
   7  -1  -1  122.19    7.00
   7   1   1  118.79    7.00
   8   1  -1   11.00    2.90
   8   1  -1   25.30    3.70
   8  -1   1    6.80    2.60
   8  -1  -1   11.60    2.90
   8   1   1   10.30    2.60
   8   1   1   14.40    2.90
   9  -1   1  100.99    6.60
   9   1  -1   77.59    8.40
   9   1  -1   80.69    5.30
   9   1  -1   80.59    6.50
   9  -1   1  107.49    5.10
   9   1   1   90.99    6.70
   9   1   1  105.39    5.70
  10   1  -1    7.10    4.80
  10  -1   1    4.10    5.40
  10  -1  -1   -3.00    4.30
  10   1   1   -1.70    4.30
  11   1  -1   -0.70    3.00
  11  -1   1    1.20    3.30
  11  -1  -1   -0.20    3.10
  11   1   1   -3.70    2.90
  12  -1   1   -1.50    2.30
  12   1  -1   -0.30    2.30
  12  -1  -1    0.00    3.00
  12   1   1    0.40    2.40
   0  -2  -1  299.27   13.50
   0  -2  -1  358.66   13.60
   0   2   1  283.07   13.80
   0  -2   1  354.66   13.70
   0   2  -1  340.47   13.70
   1   2  -1  202.38    9.00
   1  -2   1  197.98    8.80
   1  -2   1  214.68    8.80
  -1  -2  -1  221.18    9.00
   1  -2   1  223.18    8.90
   1   2   1  210.88    9.10
  -1  -2   1  210.58    9.00
   1  -2  -1  187.78    8.50
  -1  -2   1  214.48   10.00
   1  -2  -1  194.88    8.60
  -2  -2  -1    1.80    1.50
   2  -2   1    2.40    1.30
   2   2  -1    1.10    1.70
   2  -2   1    1.60    1.20
   2  -2  -1    2.60    0.90
  -2  -2   1    2.40    1.60
   2   2   1    0.30    1.60
   2  -2  -1    2.50    0.80
   3  -2   1  131.09    6.40
   3   2  -1  148.49    7.00
   3   2  -1  135.29    6.20
  -3  -2  -1  139.09    6.90
   3  -2   1  152.18    6.50
   3  -2   1  137.19    6.30
   3  -2  -1  137.59    6.20
  -3  -2   1  140.49    8.10
   3  -2  -1  125.29    6.00
  -3  -2   1  121.29    6.80
   3  -2  -1  125.29    6.30
   3   2   1  125.49    7.30
   4   2  -1  193.28    9.50
   4  -2   1  203.48    8.90
   4   2  -1  188.08    8.80
   4  -2   1  190.48    8.80
   4   2   1  181.18    8.70
   4  -2  -1  196.48    8.90
   4  -2  -1  200.88    8.80
   4   2   1  183.68    9.90
   5   2  -1    5.10    1.70
   5  -2   1    7.50    2.00
   5   2  -1    5.20    2.30
   5  -2   1    4.90    1.70
   5  -2   1    9.10    2.10
   5   2  -1    6.40    2.40
   5   2   1   12.60    2.50
   5  -2  -1    8.10    2.00
   5   2   1    5.90    1.60
   5   2   1    6.60    2.30
   6   2  -1   29.60    4.20
   6   2  -1   45.70    4.60
   6  -2   1   35.00    3.60
   6   2  -1   25.20    3.10
   6   2   1   32.90    3.10
   6  -2  -1   29.90    3.70
   6   2   1   47.80    4.60
   6  -2  -1   32.90    3.30
   7   2  -1  107.19    6.50
   7  -2   1  104.19    6.10
   7   2  -1  113.89    7.00
   7  -2   1  102.89    6.50
   7   2   1  103.69    6.40
   7   2   1  102.49    7.30
   7  -2  -1  115.59    6.70
   8   2  -1   30.40    4.30
   8   2  -1   42.90    4.50
   8  -2   1   25.20    4.20
   8  -2  -1   30.70    4.30
   8   2   1   38.30    5.10
   8   2   1   35.00    4.20
   9  -2   1   39.30    4.70
   9  -2   1   41.30    7.30
   9   2  -1   36.00    7.00
   9   2  -1   29.10    4.50
   9   2  -1   31.60    3.70
   9  -2  -1   61.99    8.80
   9  -2  -1   31.10    4.70
   9   2   1   46.50    5.00
   9   2   1   31.30    3.90
  10   2  -1   23.10    5.10
  10  -2   1    4.10    4.70
  10   2  -1   -3.80    3.80
  10   2   1   27.40    5.30
  10   2   1   20.30    3.10
  10   2   1    1.40    4.00
  10  -2  -1    7.60    5.30
  11   2  -1   27.60    6.60
  11  -2   1    2.80    3.40
  11   2   1   40.90    8.10
  11  -2  -1    1.60    4.30
  12  -2   1    0.90    2.50
  12   2  -1    0.30    2.50
  12   2   1   -0.50    2.30
   0   3   1  105.09    5.40
   0  -3  -1  111.29    5.40
   0   3  -1  110.69    5.50
   0  -3   1  123.39    5.50
   0  -3  -1  125.79    5.40
  -1  -3  -1 2145.99   93.49
   1  -3   1 2385.46   92.89
   1   3  -1 2257.07   93.09
  -1  -3  -1 2456.75   92.99
   1  -3   1 2400.56   92.79
  -1  -3   1 2258.07   93.59
   1   3   1 2330.07   93.09
   1  -3  -1 2133.99   92.69
  -1  -3   1 2271.37   92.99
  -2  -3  -1  145.59    8.20
   2   3  -1  157.28    7.40
  -2  -3  -1  154.28    7.30
   2  -3   1  150.68    6.70
   2  -3   1  145.09    6.70
  -2  -3   1  146.29    7.20
  -2  -3   1  145.59    7.90
   2  -3  -1  146.19    6.30
   2  -3  -1  133.09    6.30
   3   3  -1  345.97   14.80
  -3  -3  -1  320.67   14.50
   3   3  -1  331.67   13.90
   3  -3   1  312.57   14.00
   3  -3   1  321.37   14.00
   3  -3  -1  345.37   13.70
  -3  -3   1  302.77   14.90
  -3  -3   1  355.96   16.00
   3  -3  -1  319.67   14.00
   3  -3  -1  321.17   13.70
   4   3  -1   26.90    2.50
   4  -3   1   29.60    2.60
   4  -3   1   26.70    2.90
   4   3  -1   30.80    4.10
   4  -3  -1   26.40    2.80
   4   3   1   32.10    3.90
   4   3   1   27.40    2.60
   4  -3  -1   28.10    3.00
   5  -3   1  111.09    6.10
   5  -3   1  114.89    6.10
   5  -3   1  103.39    6.00
   5   3  -1  108.49    5.90
   5   3  -1  115.19    6.90
   5   3  -1  106.39    6.70
   5   3   1  106.09    7.20
   5  -3  -1  108.79    6.10
   5  -3  -1  134.09    5.50
   5   3   1  102.19    6.90
   5   3   1   97.79    5.70
   6  -3   1   25.80    3.10
   6   3  -1   27.30    4.20
   6  -3   1   25.90    3.10
   6   3  -1   24.20    3.20
   6   3  -1   26.50    4.40
   6  -3   1   22.70    3.10
   6   3   1   14.70    3.20
   6  -3  -1   27.30    2.70
   6   3   1   21.70    3.30
   6   3   1   23.00    3.00
   6  -3  -1   23.10    3.20
   7   3  -1   91.79    6.60
   7  -3   1   79.59    5.50
   7   3  -1   87.19    5.70
   7  -3  -1   86.29    5.90
   7   3   1   88.89    6.90
   7   3   1   81.39    5.60
   8  -3   1   24.90    4.00
   8   3  -1   19.60    3.30
   8   3  -1   26.50    4.10
   8   3   1   25.20    3.80
   8  -3  -1   24.90    3.80
   9   3  -1   21.80    3.50
   9   3  -1   25.10    4.80
   9  -3   1   26.30    4.40
   9   3   1   21.10    3.50
   9   3   1   18.30    2.90
   9   3   1   20.50    3.60
   9  -3  -1   18.50    3.50
  10   3  -1    4.80    4.40
  10   3  -1    7.00    1.90
  10   3  -1   -2.40    3.80
  10  -3   1    7.80    4.80
  10   3   1    4.90    4.40
  10   3   1    6.80    2.20
  10   3   1   -1.50    3.40
  11   3  -1   19.30    5.20
  11   3  -1   -1.00    3.00
  11  -3   1    2.70    3.20
  11   3   1   -0.70    3.20
  11   3   1   15.10    4.90
  12   3  -1    0.90    2.40
  12   3   1   -0.80    2.10
   0  -4   1    7.50    2.40
   0   4  -1    9.50    1.80
   0  -4  -1    8.40    1.60
   0  -4  -1    8.40    1.70
   0   4   1    9.50    1.60
   0  -4   1   14.00    2.50
  -1  -4  -1  112.99    7.00
   1   4  -1  107.19    5.80
  -1  -4  -1  126.89    5.90
   1  -4   1  116.19    5.50
   1  -4   1  111.89    5.50
   1   4   1  115.99    6.00
  -1  -4   1  106.29    5.70
   1  -4  -1  103.69    5.30
  -1  -4   1  109.79    6.60
  -2  -4  -1  148.29    8.70
   2  -4   1  140.89    6.60
  -2  -4  -1  149.79    7.40
   2  -4   1  143.99    6.80
   2   4  -1  153.78    7.70
   2  -4  -1  152.58    6.50
   2  -4  -1  129.99    6.40
  -2  -4   1  148.19    7.50
   2  -4  -1  137.39    6.90
   2   4   1  152.88    7.60
   3   4  -1   63.29    5.00
   3  -4   1   62.49    3.60
   3   4  -1   62.79    3.70
  -3  -4  -1   62.69    6.30
  -3  -4  -1   60.89    4.80
   3  -4   1   55.29    3.70
   3  -4  -1   55.89    3.30
  -3  -4   1   73.89    7.20
   3  -4  -1   59.19    3.80
   3  -4  -1   64.49    3.40
   3   4   1   62.49    3.50
   3   4   1   68.59    5.10
   4  -4   1   12.20    2.00
   4   4  -1   12.50    2.00
   4   4  -1   14.10    2.90
   4  -4   1   14.20    2.60
   4   4   1   15.20    2.20
  -4  -4   1   10.00    3.20
   4  -4  -1   15.60    2.20
   4   4   1   14.80    2.90
   4  -4  -1   11.70    2.10
   5   4  -1   75.39    4.70
   5   4  -1   85.19    6.20
   5  -4   1   82.59    5.00
   5  -4   1   80.89    5.10
   5  -4   1   70.79    4.70
   5   4  -1   85.99    6.10
   5  -4  -1   93.09    4.40
   5   4   1   76.79    4.80
   5   4   1   84.19    6.30
   5  -4  -1   84.89    5.00
   5   4   1   77.69    6.30
   6   4  -1   78.29    6.10
   6  -4   1   77.99    5.30
   6  -4   1   72.69    5.20
   6   4  -1   81.99    6.10
   6   4  -1   83.89    5.20
   6  -4  -1   88.89    5.30
   6  -4  -1   74.29    4.10
   6   4   1   77.19    6.40
   6   4   1   65.89    6.20
   6   4   1   84.09    5.00
   7   4  -1   29.80    5.00
   7   4  -1   28.10    3.80
   7  -4   1   23.20    3.80
   7  -4  -1   26.70    3.90
   7   4   1   31.10    5.40
   8   4  -1   36.70    5.00
   8  -4   1   15.10    2.90
   8   4  -1   18.00    3.20
   8   4   1   25.00    4.00
   8  -4  -1   24.90    4.20
   9  -4   1    9.20    4.10
   9   4  -1    0.10    3.40
   9  -4   1    7.80    3.80
   9   4  -1   18.10    3.20
   9   4  -1   12.90    2.70
   9   4  -1   20.40    4.70
   9   4   1    9.10    3.20
   9   4   1   10.80    2.70
   9   4   1   11.50    3.30
   9  -4  -1   10.90    4.20
   9   4   1    4.30    3.80
  10   4  -1    2.30    1.90
  10   4  -1    8.60    4.50
  10   4  -1   -3.50    3.20
  10   4   1   -1.30    3.20
  10   4   1   -1.70    2.00
  10   4   1    3.20    4.40
  11   4  -1    3.60    4.50
  11   4  -1   -1.40    2.90
  11   4   1   -2.30    2.70
  11   4   1   -0.70    4.10
  12   4  -1   -1.70    2.00
  12   4  -1    3.90    4.10
  12   4   1   11.00    4.20
  12   4   1   -1.20    2.00
   0  -5  -1  141.79    7.20
   0  -5   1  152.88    8.30
   0  -5  -1  164.78    7.40
   0  -5   1  160.18    7.50
   0   5   1  142.99    7.40
   0   5  -1  154.38    7.50
   1   5  -1  175.98    8.70
  -1  -5  -1  182.68    8.50
  -1  -5  -1  158.98    9.80
   1  -5   1  158.98    8.10
   1  -5   1  187.08    8.30
  -1  -5   1  191.08    8.60
   1   5   1  175.18    8.60
   1  -5  -1  166.28    8.00
   1  -5  -1  184.88    8.00
   2  -5   1   71.79    4.30
   2  -5   1   71.49    4.00
  -2  -5  -1   82.49    5.20
   2   5  -1   77.69    4.30
   2   5  -1   76.89    5.10
  -2  -5  -1   75.29    6.90
   2   5   1   75.39    5.40
  -2  -5   1   71.49    4.90
   2  -5  -1   78.09    4.00
   2  -5  -1   69.29    3.90
   3  -5   1   32.10    3.00
  -3  -5  -1   31.30    4.20
   3  -5   1   34.40    2.80
   3   5  -1   34.30    2.50
  -3  -5  -1   34.60    5.80
   3   5  -1   35.00    4.30
   3   5   1   34.80    4.50
  -3  -5   1   49.90    6.80
   3  -5  -1   28.80    2.40
   3  -5  -1   33.00    2.50
   3   5   1   29.60    2.50
   3  -5  -1   37.00    3.00
   4   5  -1   46.00    3.40
   4   5  -1   43.50    5.20
   4  -5   1   46.90    3.40
   4  -5   1   51.29    3.50
   4   5  -1   39.40    4.70
   4  -5  -1   43.10    3.60
  -4  -5   1   51.09    6.50
   4   5   1   46.30    5.90
   4   5   1   53.49    5.00
   4   5   1   38.20    3.00
   4  -5  -1   51.09    3.00
   5   5  -1  112.39    6.30
   5   5  -1  114.89    7.70
   5   5  -1  113.59    7.80
   5  -5   1  118.09    6.30
   5  -5   1  117.19    6.40
   5   5   1  118.39    7.70
   5  -5  -1  143.79    5.50
   5  -5  -1  125.39    6.60
   5   5   1  110.89    6.30
   5   5   1  119.49    7.90
   6   5  -1   20.90    3.50
   6   5  -1   19.20    3.20
   6  -5   1   19.70    2.60
   6   5  -1   13.80    3.30
   6  -5   1   18.60    3.10
   6   5   1   16.10    3.40
   6   5   1   17.70    3.50
   6  -5  -1   26.10    3.60
   7   5  -1   52.39    4.70
   7  -5   1   61.29    5.00
   7   5  -1   64.59    6.30
   7   5   1   54.29    6.30
   7  -5  -1   60.59    5.00
   8   5  -1   21.60    3.90
   8  -5   1   39.40    4.60
   8  -5  -1   32.60    4.50
   8   5   1   35.60    5.80
   9   5  -1   -0.60    3.30
   9   5  -1    2.90    3.00
   9   5  -1    7.20    4.00
   9   5  -1    7.70    3.10
   9   5  -1    1.60    2.40
   9  -5   1    2.50    3.70
   9   5   1    5.90    3.20
   9   5   1    0.80    3.30
   9   5   1    5.00    2.60
   9   5   1    8.70    3.20
  10   5  -1   -1.40    3.00
  10   5  -1   10.00    4.40
  10   5  -1   -1.50    2.00
  10  -5   1    3.20    3.50
  10   5   1    2.80    4.10
  10   5   1   -3.20    2.70
  10   5   1    1.70    2.70
  10   5   1    2.20    2.30
  11   5  -1   11.10    4.70
  11   5   1   12.30    4.70
  11   5   1    9.70    1.80
  12   5  -1   10.50    4.20
  12   5   1   10.50    4.10
   0   6  -1    1.40    1.90
   0  -6   1    1.70    1.90
   0  -6  -1    2.80    1.90
   0  -6   1    0.30    2.10
   1   6  -1   24.10    2.30
   1   6  -1   29.60    3.70
  -1  -6  -1   23.90    3.40
   1  -6   1   27.60    3.20
  -1  -6  -1   21.20    4.20
   1   6   1   15.50    2.60
  -1  -6   1   27.60    3.40
   1  -6  -1   21.80    2.90
  -2  -6  -1   15.70    3.50
   2   6  -1   20.80    2.20
   2  -6   1   18.80    2.20
  -2  -6  -1   23.00    3.20
   2   6  -1   24.80    3.60
  -2  -6   1   21.60    4.70
   2  -6  -1   19.40    2.40
   2  -6  -1   20.80    2.40
  -2  -6   1   21.00    3.50
   2   6   1   22.00    3.20
   3   6  -1   34.80    4.60
   3  -6   1   33.50    2.90
   3  -6   1   39.10    3.00
   3   6  -1   29.20    2.80
  -3  -6  -1   30.90    6.20
  -3  -6   1   37.50    8.20
   3  -6  -1   38.00    2.70
   3  -6  -1   36.30    3.10
   3   6   1   36.80    4.60
   3   6   1   36.20    2.70
   4   6  -1    0.20    2.60
   4  -6   1   -0.50    1.60
   4   6  -1    0.90    1.40
   4  -6   1   -1.10    1.40
   4   6  -1    1.50    2.80
   4   6   1   -1.50    2.60
  -4  -6   1   -0.80    2.70
   4  -6  -1    2.00    1.10
   4   6   1    2.00    2.60
   4   6   1    2.30    1.50
   4  -6  -1    0.30    1.60
   5   6  -1   10.80    2.90
   5   6  -1    1.20    2.60
   5  -6   1    8.50    2.20
   5   6  -1    3.50    1.80
   5  -6   1    7.20    1.70
   5  -6  -1    8.00    2.10
   5   6   1    5.50    3.10
   5   6   1    6.30    3.00
   6   6  -1   49.80    6.00
   6   6  -1   50.59    4.30
   6  -6   1   49.60    3.90
   6  -6   1   55.79    4.60
   6   6  -1   50.09    5.60
   6   6   1   65.99    6.50
   6  -6  -1   57.39    4.60
   6   6   1   56.89    6.00
   7   6  -1   21.30    3.90
   7  -6   1   14.90    3.00
   7   6   1   12.60    3.70
   7  -6  -1   11.20    2.80
   8  -6   1    6.20    4.20
   8   6  -1    5.60    3.10
   8  -6   1    2.00    2.70
   8   6   1    0.60    3.20
   8  -6  -1    3.10    2.70
   9  -6   1    7.20    3.90
   9   6  -1   11.90    3.30
   9   6  -1   10.60    2.90
   9   6  -1    0.30    3.20
   9   6  -1   31.00    5.60
   9   6  -1   21.70    4.70
   9   6   1    1.10    3.20
   9   6   1    0.30    2.90
   9   6   1    7.40    2.80
   9   6   1    5.60    3.30
  10   6  -1   57.49    7.90
  10  -6   1   53.79    6.30
  10   6  -1   52.79    4.70
  10   6  -1   52.19    5.90
  10   6   1   67.49    8.10
  10   6   1   49.70    4.90
  10   6   1   50.69    6.00
  11   6  -1    0.80    2.70
  11   6  -1    2.70    4.20
  11   6   1    6.80    1.80
  11   6   1   11.60    4.40
  11   6   1   -1.90    2.40
  12   6  -1   -0.30    3.30
  12   6  -1   -0.80    1.90
  12   6   1   -1.50    3.40
  12   6   1   -0.90    2.00
   0  -7  -1  281.47   12.30
   0  -7   1  271.27   12.40
   0  -7   1  246.28   13.30
   1   7  -1   46.40    3.10
  -1  -7  -1   55.69    4.40
  -1  -7  -1   39.70    5.40
   1  -7   1   50.69    4.10
  -1  -7   1   52.29    4.60
   1  -7  -1   51.49    3.90
   1   7   1   40.50    2.80
  -2  -7  -1  116.49    6.60
   2  -7   1  106.29    5.60
   2   7  -1   94.99    5.10
  -2  -7  -1  110.19    9.80
   2  -7   1  100.69    5.20
   2  -7  -1  111.29    5.30
   2  -7  -1  101.59    5.10
  -2  -7   1   75.09    9.20
  -2  -7   1  108.29    6.60
   2   7   1   92.49    4.90
   3   7  -1   82.69    4.80
  -3  -7  -1   69.79    8.80
   3  -7   1   87.29    5.00
   3  -7   1   97.09    5.10
   3  -7  -1   97.79    4.80
  -3  -7   1   96.69   10.80
   3  -7  -1   87.59    5.00
   4  -7   1    2.80    1.60
   4  -7   1    4.50    1.40
   4   7  -1    3.40    1.60
   4   7  -1    1.10    2.80
   4   7  -1    0.90    2.70
   4  -7   1    3.40    1.80
   4  -7  -1    1.80    1.90
   4   7   1   -0.10    2.60
   4  -7  -1    3.00    1.20
  -4  -7   1    2.90    3.60
   5   7  -1   21.80    3.90
   5  -7   1   18.90    2.90
   5   7  -1   11.30    3.30
   5   7  -1   21.70    3.00
   5  -7   1   23.20    2.80
   5   7   1   22.80    4.00
   5  -7  -1   24.90    3.40
   6  -7   1    4.90    2.40
   6   7  -1    4.60    3.40
   6   7  -1   -0.80    2.60
   6  -7  -1    4.70    2.40
   6   7   1   10.70    3.40
   7   7  -1   18.10    4.20
   7  -7   1   20.40    3.30
   7   7   1   20.40    4.40
   7  -7  -1   18.70    3.30
   8   7  -1    4.50    3.30
   8  -7   1   19.60    4.80
   8   7  -1   12.80    3.40
   8   7  -1   11.70    3.50
   8  -7   1   13.00    3.20
   8   7   1   15.30    4.50
   8   7   1   13.00    3.50
   8  -7  -1   12.10    3.20
   8   7   1   15.70    3.50
   8  -7  -1   15.70    4.50
   9   7  -1   35.60    4.80
   9   7  -1   34.60    4.80
   9   7  -1   35.20    5.90
   9  -7   1   37.50    6.10
   9   7  -1   41.40    7.60
   9   7   1   39.60    7.50
   9   7   1   33.80    5.90
   9   7   1   28.30    4.40
   9   7   1   24.90    4.70
   9  -7  -1   37.80    6.00
  10   7  -1   60.69    5.20
  10  -7   1   64.19    6.70
  10   7  -1   59.29    6.40
  10   7  -1   57.69    7.90
  10   7   1   69.29    6.60
  10   7   1   58.39    7.90
  10   7   1   71.79    5.40
  11   7  -1   14.20    4.60
  11   7  -1   12.20    2.40
  11   7   1   16.90    4.60
  11   7   1   16.70    2.80
   0  -8  -1  145.39    7.80
   0  -8   1  145.19    7.90
  -1  -8  -1  648.84   26.90
   1   8  -1  573.34   25.90
  -1  -8  -1  598.24   28.80
   1  -8   1  651.63   26.60
  -1  -8   1  658.93   27.00
   1   8   1  549.35   25.70
   1  -8  -1  692.93   26.50
   2  -8   1   10.80    2.20
   2  -8   1   14.10    2.30
  -2  -8  -1    8.00    4.00
   2   8  -1   12.40    1.80
  -2  -8  -1   11.70    2.80
  -2  -8   1   17.00    3.30
   2  -8  -1   17.40    2.70
  -2  -8   1   10.00    5.30
   3  -8   1   82.89    4.90
   3   8  -1   82.59    4.80
  -3  -8  -1  101.69    6.60
   3  -8   1   99.39    5.20
   3   8  -1   89.99    7.10
  -3  -8  -1   85.89    9.60
   3  -8   1   96.39    5.20
  -3  -8   1   75.09   10.90
   3  -8  -1   81.39    5.00
   3  -8  -1   88.89    4.80
  -3  -8   1   89.99    6.90
   4   8  -1    4.90    3.00
   4  -8   1    9.70    2.30
   4  -8   1   11.50    1.90
   4  -8  -1    9.70    1.50
  -4  -8   1    7.60    4.50
   4   8   1   10.20    3.50
   4  -8  -1   10.20    2.30
   5   8  -1   10.80    3.40
   5  -8   1   11.10    2.50
   5  -8   1    8.40    1.70
   5   8   1   12.20    3.60
   5  -8  -1    9.80    2.30
   6   8  -1   14.40    3.90
   6  -8   1    7.60    2.50
   6  -8  -1   12.90    2.90
   6   8   1   20.60    4.10
   7  -8   1    3.60    2.50
   7   8  -1    5.80    3.70
   7  -8  -1    1.60    2.60
   7   8   1   21.90    4.50
   8  -8   1    7.20    4.10
   8  -8   1    5.60    2.90
   8   8  -1    3.60    3.00
   8   8  -1   -0.20    3.00
   8   8  -1    6.60    3.50
   8   8  -1    9.00    4.50
   8   8  -1    7.30    3.80
   8   8   1    5.00    3.80
   8  -8  -1    1.20    2.60
   8   8   1   -0.60    2.90
   8   8   1    9.60    3.50
   8  -8  -1    9.30    4.10
   8   8   1    4.60    3.20
   9  -8   1   21.60    4.60
   9   8  -1   27.80    4.30
   9   8  -1   27.90    5.40
   9   8  -1   28.80    4.50
   9   8  -1   29.40    4.90
   9   8   1   39.60    6.20
   9   8   1   32.10    6.30
   9   8   1   37.70    5.20
   9   8   1   29.40    5.10
   9  -8  -1   22.60    4.60
  10   8  -1   12.80    2.80
  10  -8   1   16.60    4.00
  10   8  -1   16.10    4.70
  10   8  -1   12.00    3.40
  10   8   1   15.60    4.80
  10   8   1   10.80    2.90
  10  -8  -1   16.60    4.40
  10   8   1   11.40    3.40
  11   8  -1   -2.20    3.60
  11   8  -1    1.80    1.50
  11   8  -1   -0.60    1.80
  11  -8   1    0.10    3.10
  11   8  -1    0.20    1.50
  11   8   1    4.70    4.00
  11   8   1   -2.40    1.70
  11   8   1   -0.10    1.70
   0  -9  -1 1296.67   53.79
   0  -9  -1 1262.57   53.49
   0  -9   1 1304.97   53.89
   0  -9   1 1314.07   53.69
   2   9  -1  185.58    9.50
   2  -9   1  210.38   10.00
   2  -9   1  229.48   10.30
  -2  -9  -1  223.58   10.80
  -2  -9  -1  219.68    9.50
  -2  -9  -1  197.88   13.20
  -2  -9  -1  206.08   10.90
  -2  -9   1  209.38   14.60
   2  -9  -1  221.38    9.90
   2  -9  -1  193.78    9.60
  -2  -9   1  210.28   10.90
  -2  -9   1  209.18   10.90
  -3  -9  -1   76.69    9.90
   3  -9   1   69.29    4.50
  -3  -9  -1   79.49    6.30
   3  -9   1   74.49    4.70
   3  -9  -1   68.39    4.30
  -3  -9   1   74.89    6.20
  -3  -9   1   63.69   11.10
   3  -9  -1   67.99    4.50
   4  -9   1   20.00    2.80
   4  -9   1   14.80    2.70
   4   9  -1   19.30    4.00
   4   9   1   18.80    3.90
  -4  -9   1   14.30    5.90
   4  -9  -1   12.40    2.30
   4  -9  -1   21.30    3.10
   5  -9   1   27.20    3.70
   5  -9   1   27.30    2.80
   5   9  -1   43.10    6.70
   5  -9  -1   27.70    3.70
   5   9   1   20.90    4.20
   6  -9   1   27.40    3.90
   6   9  -1   24.90    4.90
   6   9   1   23.90    5.00
   6  -9  -1   19.40    3.20
   7  -9   1   16.70    6.20
   7   9  -1   13.40    4.00
   7  -9   1   12.70    3.30
   7  -9  -1   13.80    3.10
   7   9   1   20.00    5.20
   8   9  -1    6.80    4.10
   8   9  -1   -0.20    3.10
   8  -9   1   14.10    4.50
   8   9  -1    4.60    3.20
   8   9  -1    2.90    4.10
   8   9  -1    0.80    3.20
   8   9   1    9.20    3.60
   8  -9  -1    1.70    3.90
   8   9   1   -0.30    2.80
   8   9   1   12.90    4.50
   9   9  -1   18.60    3.70
   9   9  -1   20.30    4.00
   9   9  -1   19.50    4.30
   9   9  -1   10.20    4.50
   9  -9   1   23.70    4.80
   9   9   1   31.10    5.50
   9   9   1   34.10    6.30
   9   9   1   29.60    4.90
   9   9   1   29.30    4.80
   9  -9  -1   24.40    4.60
  10   9  -1   15.10    4.60
  10   9  -1   18.30    3.60
  10   9  -1   13.40    2.80
  10  -9   1   18.90    4.00
  10   9   1   13.70    3.60
  10  -9  -1   20.20    3.90
  10   9   1   14.90    3.00
  10   9   1   17.50    4.80
  11  -9   1   11.50    2.80
  11   9  -1   11.50    2.00
  11   9  -1    9.40    4.30
  11   9  -1   11.80    2.30
  11   9   1   14.00    4.40
  11   9   1    9.50    2.60
  11   9   1   11.20    2.10
   0 -10   1  290.47   13.70
   0 -10  -1  279.77   13.60
   0 -10   1  294.77   12.40
   0 -10   1  271.17   13.50
   0 -10  -1  289.77   12.40
   0 -10  -1  280.37   13.20
   1  10  -1    3.30    1.50
  -1 -10  -1    3.10    2.40
  -1 -10  -1    3.40    1.80
   1 -10   1    3.90    2.10
  -1 -10  -1    4.50    2.30
   1 -10   1    2.90    1.50
   1 -10   1    0.20    2.30
  -1 -10   1    3.80    2.30
   1 -10  -1    1.90    2.20
   1 -10  -1    2.50    2.00
  -1 -10   1    2.30    2.60
   1 -10  -1    1.80    1.50
  -1 -10   1    1.40    1.80
  -2 -10  -1  217.38    9.00
   2 -10   1  195.28    9.70
  -2 -10  -1  182.58   10.40
  -2 -10  -1  193.78   10.20
   2 -10   1  185.78    9.40
  -2 -10   1  171.28   13.50
  -2 -10   1  162.28   11.00
   2 -10  -1  193.98    9.10
  -2 -10   1  186.58   10.30
   2 -10  -1  197.88    9.40
   3 -10   1   18.00    3.10
  -3 -10  -1   17.80    3.50
  -3 -10  -1   23.90    2.80
   3 -10   1   24.30    3.00
  -3 -10  -1   13.60    4.30
  -3 -10   1   22.90    5.70
  -3 -10   1   31.30    5.20
   3 -10  -1   19.20    2.80
  -4 -10  -1  141.19    8.80
   4 -10   1  125.99    6.70
   4  10  -1  123.69    9.40
   4 -10  -1  125.59    6.10
  -4 -10   1  128.39   13.60
   5  10  -1   51.29    7.20
  -5 -10  -1   36.90    3.90
   5  10   1   44.50    7.20
   5 -10  -1   40.90    4.10
   6  10  -1  112.69    9.50
   6 -10   1  111.79    7.00
  -6 -10  -1  111.29    6.60
   6  10   1  100.59    9.70
   7  10  -1   25.50    5.00
   7 -10   1   21.90    3.60
   7  10  -1   28.50    5.40
   7  10  -1   28.60    4.60
   7 -10   1   24.70    5.20
  -7 -10   1   28.30    4.10
   7  10   1   32.40    5.60
   7 -10  -1   28.40    4.50
   7  10   1   25.30    4.60
   7 -10  -1   27.20    5.20
   8  10  -1   68.69    8.40
   8  10  -1   75.89    9.30
   8  10  -1   83.19    7.70
   8  10  -1   86.79    9.10
   8 -10   1   87.79    7.90
   8  10   1   64.09    8.40
   8 -10  -1   91.89    8.10
   8  10   1   76.99    7.90
   8  10   1   84.29    8.90
   9  10  -1   21.40    4.90
   9 -10   1   18.40    4.50
   9  10  -1   18.40    3.60
   9  10  -1   20.80    4.10
   9  10   1   36.50    6.60
   9 -10  -1   14.60    4.20
   9  10   1   29.70    5.40
   9  10   1   29.90    5.10
  10 -10   1   37.40    5.50
  10  10  -1   38.50    4.40
  10  10  -1   32.10    5.70
  10  10  -1   36.90    6.70
  10  10   1   61.19    6.20
  10  10   1   36.00    6.70
  10 -10  -1   33.10    5.10
  10  10   1   42.80    4.50
  11  10  -1   11.30    2.20
  11  10  -1    9.20    3.40
  11 -10   1    8.40    2.50
  11  10   1    9.40    3.40
  11  10   1    9.10    1.90
  11  10   1    6.20    2.30
   0 -11   1    0.90    2.40
   0 -11   1    2.40    2.30
   0 -11  -1    1.70    1.50
   0 -11   1   -2.20    1.60
   0 -11  -1   -0.50    2.30
   0 -11  -1   -0.80    2.00
  -1 -11  -1   97.79    6.70
   1 -11   1   90.69    6.30
  -1 -11  -1   88.29    6.50
   1 -11   1   99.39    6.60
  -1 -11  -1  101.19    5.30
   1 -11   1   97.99    5.00
  -1 -11   1   87.09    6.70
   1 -11  -1   99.19    6.40
  -1 -11   1  102.09    5.30
  -1 -11   1   96.29    7.10
   1 -11  -1   93.79    6.10
   1 -11  -1   91.19    5.00
   2 -11   1    1.20    2.00
  -2 -11  -1    1.60    2.70
   2 -11   1    3.60    2.10
  -2 -11  -1    2.00    2.70
  -2 -11  -1    1.80    2.00
  -2 -11   1    4.80    2.00
   2 -11  -1    2.10    1.90
   2 -11  -1    1.90    1.80
  -2 -11   1    4.60    2.80
  -3 -11  -1   33.30    4.60
  -3 -11  -1   32.50    3.50
   3 -11   1   29.20    3.50
   3 -11   1   23.00    3.10
  -3 -11   1   23.70    4.20
  -3 -11   1   21.10    6.10
   3 -11  -1   21.70    3.00
  -4 -11  -1   25.40    3.50
  -4 -11  -1   20.80    4.30
  -4 -11   1   18.40    4.50
  -4 -11   1   21.40    7.10
  -5 -11  -1    0.80    2.20
   5  11  -1    2.60    3.40
   5  11   1    3.10    4.10
   6  11  -1   15.10    4.90
   6  11  -1   16.30    5.80
  -6 -11  -1   14.40    2.80
  -6 -11   1   11.30    2.70
   6  11   1    9.40    4.60
   7  11  -1   22.80    5.00
   7  11  -1   13.70    3.90
   7  11  -1   19.00    5.00
   7 -11   1   19.70    5.00
   7  11   1   20.80    4.30
   7  11   1   13.90    4.90
   7 -11  -1   24.10    5.10
  -7 -11   1   13.30    3.00
   8 -11   1   25.30    5.10
   8  11  -1   18.90    4.90
   8  11  -1   25.90    4.40
   8  11  -1   22.60    5.30
   8  11   1   16.10    4.10
   8 -11  -1   22.60    5.00
   8  11   1   22.30    5.10
   8  11   1   16.50    5.10
   9  11  -1   28.30    5.50
   9 -11   1   32.60    6.20
   9  11  -1   43.30    6.60
   9  11  -1   36.00    5.30
   9 -11  -1   39.50    5.80
   9  11   1   38.60    5.30
   9  11   1   32.10    4.80
   9  11   1   36.60    7.30
  10 -11   1   24.20    3.90
  10  11  -1   21.40    4.60
  10  11  -1   25.00    4.00
  10  11  -1   27.80    5.40
  10  11   1   37.70    5.70
  10  11   1   26.30    4.20
  10 -11  -1   20.10    3.80
  10  11   1   17.30    4.20
  11  11  -1   14.90    3.30
  11  11  -1   16.00    2.10
  11 -11   1   12.50    3.10
  11  11   1   12.30    2.20
  11  11   1   16.80    2.40
  11  11   1   10.80    2.30
  11  11   1   12.20    3.00
   0 -12   1   37.00    3.20
   0 -12  -1   28.50    4.40
   0 -12  -1   36.80    3.20
   0 -12   1   38.40    4.80
   0 -12  -1   37.90    4.80
   1 -12   1   14.90    2.60
   1 -12   1   12.20    2.90
  -1 -12  -1   11.20    3.20
   1 -12   1   11.80    2.80
  -1 -12  -1   12.40    3.00
  -1 -12  -1   13.80    2.20
   1 -12  -1   13.10    2.70
  -1 -12   1   14.30    3.40
   1 -12  -1   12.70    2.80
   1 -12  -1   15.70    2.50
  -1 -12   1   16.10    2.40
  -1 -12   1   15.10    3.50
  -2 -12  -1   52.09    4.10
   2 -12   1   56.79    4.80
  -2 -12  -1   44.00    5.70
  -2 -12  -1   34.90    7.00
   2 -12   1   58.99    7.40
  -2 -12   1   61.19    4.20
   2 -12  -1   47.60    4.20
  -2 -12   1   64.09    6.30
   2 -12  -1   52.39    5.60
   3 -12   1   -1.70    1.60
  -3 -12  -1    0.10    2.20
  -3 -12  -1   -4.50    2.80
  -3 -12   1   -0.50    2.20
  -3 -12   1   -2.60    3.20
  -4 -12  -1    4.30    2.40
  -4 -12  -1    3.10    3.70
  -4 -12   1    0.10    2.30
  -4 -12   1    2.10    3.60
  -5 -12  -1   -0.60    2.20
   5  12  -1    6.90    4.10
   5 -12  -1    0.90    4.90
  -5 -12   1    6.20    2.50
   6 -12   1   16.40    4.80
   6  12  -1   30.80    5.70
   6  12  -1   21.20    4.30
  -6 -12  -1   16.20    3.10
   6  12   1   30.60    5.70
   6  12   1   12.00    4.10
   6 -12  -1   19.70    5.00
   7  12  -1   32.20    6.60
   7 -12   1   24.80    5.00
   7  12  -1   32.20    5.30
  -7 -12  -1   26.90    4.30
   7  12  -1   28.90    5.60
   7  12   1   18.20    4.30
   7 -12  -1   26.70    5.50
   7  12   1   20.90    4.90
   7  12   1   22.40    5.50
  -7 -12   1   29.50    4.30
   8  12  -1   39.80    7.30
   8  12  -1   25.80    5.40
   8 -12   1   21.30    5.20
   8  12  -1   31.80    4.80
   8  12   1   24.10    4.50
   8 -12  -1   24.20    5.30
   8  12   1   20.50    5.10
   8  12   1   27.80    5.40
   9  12  -1    0.30    2.10
   9  12  -1    7.80    4.40
   9 -12   1    1.60    3.40
   9  12  -1    9.50    3.50
   9  12  -1    3.60    2.80
   9 -12  -1    3.10    3.50
   9  12   1   -0.50    2.10
   9  12   1    6.30    4.40
   9  12   1    3.00    3.00
   9  12   1    3.00    3.60
  10  12  -1   27.40    5.60
  10 -12   1   27.20    4.50
  10  12  -1   31.80    4.00
  10  12  -1   37.20    5.00
  10  12   1   28.00    4.00
  10  12   1   27.30    5.30
  10  12   1   14.70    3.60
  10 -12  -1   23.00    4.30
   0 -13  -1   34.00    3.40
   0 -13  -1   31.50    4.70
   0 -13   1   30.50    3.20
   0 -13   1   27.60    4.90
  -1 -13  -1  409.86   17.40
   1 -13   1  386.36   18.30
  -1 -13  -1  395.16   18.80
  -1 -13   1  419.26   17.40
   1 -13  -1  389.36   17.20
   1 -13  -1  385.26   18.10
  -1 -13   1  404.16   19.10
  -2 -13  -1    3.90    2.20
  -2 -13  -1    4.30    3.30
   2 -13   1    5.10    2.30
  -2 -13   1    4.30    3.40
   2 -13  -1    6.40    2.10
  -2 -13   1    5.00    2.30
  -3 -13  -1    6.00    3.70
  -3 -13  -1    2.80    2.30
  -3 -13   1    1.00    2.10
  -3 -13   1    0.40    3.50
  -4 -13  -1  105.49    8.80
  -4 -13  -1  102.99    6.40
  -4 -13   1  105.39    6.50
  -4 -13   1  124.89    9.50
  -5 -13  -1    3.20    4.20
   5 -13   1   -2.70    4.00
  -5 -13  -1   -2.50    2.40
   5 -13  -1   -0.20    3.90
  -5 -13   1    0.10    2.50
   6 -13   1    9.30    4.50
   6  13  -1    2.50    3.80
  -6 -13  -1    8.70    2.80
   6  13  -1    8.80    4.00
   6  13  -1   15.20    5.20
   6  13   1   10.60    3.90
  -6 -13   1   16.80    3.10
   6 -13  -1    7.80    4.30
   6  13   1    5.80    6.20
   7  13  -1   37.00    6.80
  -7 -13  -1   26.30    3.40
   7 -13   1   27.70    5.50
   7  13  -1   25.50    5.20
   7 -13  -1   30.60    5.30
   7  13   1   22.50    4.60
  -7 -13   1   40.20    4.50
   7  13   1   21.90    5.30
   8 -13   1   18.10    4.60
   8  13  -1   21.20    5.10
   8  13  -1   11.10    3.80
   8  13   1   15.40    5.00
   8  13   1   11.40    4.00
   8 -13  -1   14.60    4.40
   9 -13   1    0.80    3.20
   9  13  -1    3.50    4.10
   9  13  -1    7.20    3.50
   9  13  -1   -0.40    1.60
   9  13  -1    3.90    2.60
   9  13   1    5.70    4.00
   9  13   1    0.80    2.70
   9  13   1    0.60    1.80
   9  13   1    9.00    3.50
   9 -13  -1    5.00    3.30
  10  13  -1    6.70    2.40
  10 -13   1    8.20    2.80
  10  13  -1    6.30    2.60
  10  13  -1    3.30    2.90
  10  13   1   10.20    2.40
  10  13   1    3.80    2.90
  10  13   1   15.00    3.00
  10 -13  -1    5.90    2.60
   0 -14  -1   61.59    6.20
   0 -14   1   58.09    4.30
   0 -14  -1   70.29    4.50
   0 -14   1   59.19    6.20
   1 -14   1  177.98    9.90
  -1 -14  -1  182.78    8.70
  -1 -14  -1  173.38   10.60
   1 -14  -1  163.98    8.40
  -1 -14   1  171.78   10.50
  -1 -14   1  177.58    8.60
   1 -14  -1  178.18    9.50
  -2 -14  -1   28.80    4.90
  -2 -14  -1   26.00    4.00
   2 -14   1   27.30    4.30
   2 -14  -1   34.00    3.70
  -2 -14   1   35.20    3.80
  -2 -14   1   30.80    5.00
  -3 -14  -1    2.30    2.50
  -3 -14  -1   -0.20    3.60
  -3 -14   1   -0.30    2.40
  -3 -14   1   10.70    4.40
   4 -14   1    3.90    3.90
  -4 -14  -1    3.10    2.50
  -4 -14  -1    0.40    3.80
  -4 -14   1    0.30    4.00
  -4 -14   1    1.60    2.60
   4 -14  -1    0.70    4.20
   5 -14   1   37.30    5.90
  -5 -14  -1   36.70    6.40
   5  14  -1   33.70    5.50
  -5 -14  -1   29.90    4.30
   5 -14  -1   34.60    6.40
  -5 -14   1   35.90    4.60
   6 -14   1   -1.60    3.90
  -6 -14  -1    4.20    2.60
   6  14  -1    5.30    3.80
   6  14  -1    6.70    5.70
   6 -14  -1    3.40    4.20
  -6 -14   1    3.50    2.70
   6  14   1    5.20    3.90
  -7 -14  -1   29.40    4.00
   7  14  -1   17.10    4.70
   7  14  -1   17.80    4.20
   7 -14   1   34.30    5.70
   7  14   1   22.40    4.60
  -7 -14   1   19.00    3.10
   7 -14  -1   22.80    5.20
   7  14   1   13.10    5.00
   8  14  -1    8.30    3.70
   8  14  -1    0.60    2.40
   8 -14   1   14.50    4.30
   8  14   1   17.00    4.10
   8  14   1    2.00    4.50
   8 -14  -1    3.10    3.70
   9  14  -1    0.10    1.90
   9  14  -1   10.70    3.50
   9  14  -1    2.00    2.50
   9 -14   1    3.30    3.00
   9 -14  -1    2.10    2.90
   9  14   1    9.20    3.60
   9  14   1    0.20    1.90
   9  14   1    3.30    2.60
   0 -15  -1   85.09    7.00
   0 -15  -1   92.49    5.50
   0 -15   1   93.49    7.30
   0 -15   1   88.89    5.60
  -1 -15  -1   16.60    2.80
  -1 -15  -1   19.60    3.90
   1 -15   1   15.40    3.40
  -1 -15   1   10.00    3.70
   1 -15  -1   14.70    3.10
  -1 -15   1   15.60    2.80
   2 -15   1    4.20    2.30
  -2 -15  -1   -1.20    3.70
  -2 -15  -1   -0.30    2.40
  -2 -15   1   -0.30    3.60
  -2 -15   1    0.70    2.30
  -3 -15  -1   13.50    2.90
   3 -15   1   14.00    3.40
   3 -15   1    9.00    7.60
   3 -15   1    9.40    4.40
  -3 -15  -1   13.30    4.70
   3 -15   1   12.50    7.30
  -3 -15   1    9.30    2.80
   3 -15  -1   13.30    4.40
   3 -15  -1   16.90    7.50
  -3 -15   1   13.40    4.90
   3 -15  -1   37.10   11.00
   4 -15   1   11.20    4.20
  -4 -15  -1   17.10    3.10
  -4 -15  -1   18.60    5.10
  -4 -15   1   19.00    5.40
   4 -15  -1   20.20    5.20
   4 -15  -1   20.90   10.20
  -4 -15   1   16.60    3.10
  -5 -15  -1    3.10    2.60
  -5 -15  -1    4.30    4.60
   5  15  -1    6.50    4.10
   5 -15   1    3.70    4.20
  -5 -15   1    7.40    2.80
  -5 -15   1    0.50    4.80
   5 -15  -1    5.00    4.20
   6 -15   1   44.60    6.90
   6  15  -1   46.40    7.30
  -6 -15  -1   36.90    4.60
  -6 -15   1   46.40    4.70
   6  15   1   54.79    7.90
   6 -15  -1   56.19    7.00
   7 -15   1   62.69    7.30
   7  15  -1   62.99    7.70
   7  15   1   59.09    7.80
   7 -15  -1   57.69    7.50
   8  15  -1    6.00    3.70
   8 -15   1   19.10    4.20
   8  15   1   33.50    6.40
   8 -15  -1   11.20    3.80
   9  15  -1   24.50    4.20
   9 -15   1   25.00    4.00
   9  15  -1   32.10    5.20
   9  15   1   24.50    4.90
   9  15   1   24.50    4.00
   9 -15  -1   14.20    3.10
   0 -16   1   23.90    4.20
   0 -16   1   22.40    3.40
   0 -16   1   21.40    4.70
   0 -16   1   27.70    4.30
   0 -16  -1   18.00    3.70
   0 -16  -1   21.20    4.90
   0 -16  -1   23.90    4.50
   0 -16  -1   27.30    3.80
   1 -16   1   19.20    4.10
   1 -16   1   30.00    4.00
  -1 -16  -1   33.00    5.50
   1 -16   1   34.70    4.80
   1 -16   1   39.50    8.30
  -1 -16  -1   27.60    5.10
  -1 -16  -1   38.80    6.10
  -1 -16  -1   40.50    4.10
   1 -16  -1   35.50    4.40
  -1 -16   1   27.00    4.70
   1 -16  -1   27.50    4.50
  -1 -16   1   39.70    4.20
  -1 -16   1   44.70    5.50
   1 -16  -1   39.60    8.60
   1 -16  -1   39.20    6.30
  -2 -16  -1    2.30    3.50
  -2 -16  -1    2.80    2.50
   2 -16   1    3.80    4.70
   2 -16   1    0.70    4.30
   2 -16   1    3.00    2.30
   2 -16   1    0.30    3.80
  -2 -16  -1    0.70    3.50
  -2 -16  -1    7.90    7.00
   2 -16  -1    3.80    4.20
  -2 -16   1    8.30    6.70
   2 -16  -1    6.30    4.80
   2 -16  -1    4.70    3.90
  -2 -16   1    1.90    3.70
   2 -16  -1    1.60    2.00
  -2 -16   1   -1.00    2.50
   3 -16   1    2.20    6.80
   3 -16   1   15.60    4.60
   3 -16   1   15.00    2.40
  -3 -16  -1   10.50    2.90
   3 -16  -1   12.50    4.40
   3 -16  -1   12.00    5.80
   3 -16  -1    8.90    6.70
  -3 -16   1   14.50    3.00
  -3 -16   1   15.70    4.90
   4 -16   1   -2.70    8.40
   4 -16   1   10.60    4.30
  -4 -16  -1   10.20    2.80
  -4 -16  -1    5.00    4.50
  -4 -16   1    5.70    2.70
   4 -16  -1   10.00    4.30
  -4 -16   1    2.00    4.70
   4 -16  -1    7.00    7.70
  -5 -16  -1    1.70    4.60
  -5 -16  -1    9.70    2.80
   5 -16   1    8.10    4.20
   5 -16  -1    8.30    4.30
  -5 -16   1    8.10    2.70
  -5 -16   1    1.70    3.60
   6 -16   1    5.80    4.30
   6  16  -1    4.30    4.20
  -6 -16   1    5.00    2.60
   6  16   1   17.50    4.50
   6 -16  -1    2.20    4.10
   7  16  -1   10.90    4.10
   7 -16   1    6.50    4.10
   7 -16  -1    7.40    4.00
   7  16   1   20.90    4.80
   8  16  -1    7.30    3.90
   8 -16   1    3.80    3.20
   8 -16  -1    3.90    3.00
   8  16   1   10.60    4.10
   0 -17   1  186.58   13.00
   0 -17   1  184.88   10.30
   0 -17  -1  172.78   11.60
   0 -17   1  195.68   10.90
   0 -17  -1  167.68   13.10
   0 -17  -1  188.78   10.50
   0 -17  -1  181.28    9.90
   0 -17  -1  205.78    9.60
   1 -17   1   45.40    4.90
  -1 -17  -1   49.20    6.50
   1 -17   1   45.80    8.00
   1 -17   1   40.40    6.60
  -1 -17  -1   43.70    5.40
   1 -17   1   43.90    5.20
  -1 -17  -1   54.29    4.80
  -1 -17  -1   53.19    6.40
   1 -17  -1   38.10    6.80
  -1 -17   1   45.00    4.60
   1 -17  -1   41.50    5.90
  -1 -17   1   43.00    5.60
  -1 -17   1   53.69    6.90
   1 -17  -1   47.00    4.70
   2 -17   1   17.30    5.30
   2 -17   1   10.10    4.10
  -2 -17  -1    2.70    6.20
   2 -17   1    6.40    2.20
  -2 -17  -1    8.30    2.80
  -2 -17  -1    7.70    4.00
  -2 -17  -1   11.10    4.00
  -2 -17   1   10.70    3.80
  -2 -17   1   14.00    4.50
  -2 -17   1   11.10    2.90
  -2 -17   1   -5.60    6.00
   2 -17  -1   10.80    4.20
   2 -17  -1   -0.30    4.40
   2 -17  -1   11.90    2.00
   2 -17  -1   16.40    5.60
  -3 -17  -1   11.90    2.90
  -3 -17  -1    6.50    4.20
   3 -17   1   -2.00    7.00
   3 -17   1    3.40    4.00
   3 -17   1    7.40    1.50
   3 -17  -1   -4.00    5.60
   3 -17  -1    5.50    4.10
  -3 -17   1    6.80    4.70
  -3 -17   1   11.20    2.90
   4 -17   1    3.20    3.70
   4 -17   1   -3.30    6.90
  -4 -17  -1    2.90    4.50
  -4 -17  -1    3.70    2.50
   4 -17  -1   -2.30    7.40
  -4 -17   1    1.00    2.60
   4 -17  -1    1.10    3.80
  -4 -17   1    0.40    4.10
   5 -17   1   23.60    5.00
  -5 -17  -1   24.40    3.80
  -5 -17   1   21.80    3.30
   5 -17  -1   24.80    5.10
   6 -17   1    6.20    4.00
   6  17  -1    4.90    4.20
   6  17   1    8.60    4.40
   6 -17  -1    0.90    3.90
   7 -17   1   14.90    4.10
   7  17  -1   17.60    4.60
   7 -17  -1   18.10    4.20
   7  17   1   30.40    5.00
   8 -17   1    3.90    2.70
   8  17  -1    2.90    3.50
   8  17   1   10.90    3.50
   8 -17  -1   -3.30    2.30
   0 -18  -1   81.69    6.30
   0 -18  -1   83.69    7.60
   0 -18   1   86.89    6.90
   0 -18   1   83.59    6.50
   0 -18  -1   75.39    7.90
   0 -18  -1   72.59    9.50
   0 -18  -1   86.59    6.20
  -1 -18  -1    1.90    3.50
  -1 -18  -1    5.50    3.20
   1 -18   1    3.10    2.50
   1 -18   1    7.00    3.90
   1 -18   1    0.30    3.40
  -1 -18  -1   -4.30    4.50
  -1 -18  -1    2.30    2.50
  -1 -18  -1    3.20    3.30
   1 -18   1    0.70    4.30
   1 -18  -1    4.90    2.40
  -1 -18   1    4.70    2.60
  -1 -18   1    2.20    3.40
  -1 -18   1   -3.20    5.00
   1 -18  -1    1.80    3.70
   1 -18  -1   -0.50    3.50
  -1 -18   1    4.30    3.20
   1 -18  -1   -0.30    4.40
   2 -18   1   -0.10    3.60
  -2 -18  -1    0.50    5.00
   2 -18   1   -1.00    1.70
   2 -18   1   -1.40    4.50
  -2 -18  -1    4.90    3.50
  -2 -18  -1   -1.60    2.40
  -2 -18  -1    1.20    3.50
  -2 -18   1   -0.40    2.40
  -2 -18   1   -1.40    3.70
   2 -18  -1   -3.40    4.40
  -2 -18   1    1.10    4.80
   2 -18  -1   -0.30    3.60
   2 -18  -1    1.80    1.30
  -2 -18   1   -1.70    3.30
   2 -18  -1    1.90    4.50
  -3 -18  -1   16.70    2.90
   3 -18   1   12.00    4.10
  -3 -18  -1    9.20    4.40
   3 -18   1   -2.30    5.90
  -3 -18  -1   17.20    4.30
  -3 -18   1   12.10    2.90
  -3 -18   1   11.60    4.60
  -3 -18   1   16.30    5.00
   3 -18  -1   15.00    4.40
   4 -18   1   22.70    4.70
   4 -18   1    2.30    7.20
  -4 -18  -1   17.10    2.90
   4 -18  -1    2.90    7.00
   4 -18  -1   22.60    4.50
  -4 -18   1   17.60    3.00
   5 -18   1    4.80    3.70
   5 -18  -1    2.40    3.70
   6  18  -1   -0.80    4.80
   6 -18   1    1.50    3.40
   6 -18  -1   -0.70    3.30
   7  18  -1   14.50    4.10
   7 -18   1   16.90    3.60
   7 -18  -1   16.30    3.60
   7  18   1   18.90    4.00
   0 -19  -1   62.59    5.30
   0 -19   1   55.89    5.40
   0 -19  -1   65.79    7.10
   0 -19  -1   63.79    8.60
   1 -19   1   15.80    4.10
   1 -19   1   10.10    2.40
  -1 -19  -1   14.40    3.40
  -1 -19  -1   15.70    2.90
  -1 -19   1    9.80    3.40
  -1 -19   1   11.70    2.80
   1 -19  -1    9.00    2.10
   1 -19  -1    8.40    3.90
  -1 -19   1   -1.10    3.90
   1 -19  -1    3.80    4.50
   2 -19   1    1.30    3.60
   2 -19   1   -5.30    4.40
  -2 -19  -1    2.20    2.60
   2 -19   1    4.50    1.20
  -2 -19  -1    0.30    3.20
  -2 -19  -1   -0.10    3.70
   2 -19  -1   -1.80    4.20
  -2 -19   1    0.30    2.60
   2 -19  -1    1.30    3.70
  -2 -19   1    4.10    3.50
  -2 -19   1   -1.80    3.80
   3 -19   1    9.70    3.90
  -3 -19  -1   11.40    4.00
   3 -19   1    0.20    5.90
   3 -19  -1   -2.80    5.50
   3 -19  -1   17.40    4.20
  -3 -19   1   13.20    4.20
  -4 -19  -1   21.00    4.20
   4 -19   1   14.60    3.90
   4 -19  -1   14.70    4.20
   4 -19  -1   -1.70    6.00
   5 -19   1    4.60    3.20
   5 -19  -1    6.70    3.60
   6  19  -1   -3.10    6.20
   6 -19   1    0.90    3.00
   6 -19  -1   -1.90    2.90
   7  19  -1   -3.10    4.60
   7  19   1    5.20    5.40
   0 -20   1    1.10    2.40
   0 -20   1   -2.90    3.40
   0 -20  -1    5.20    3.30
   0 -20  -1    6.10    2.20
   0 -20  -1   -3.90    3.20
   1 -20   1   -0.60    3.70
   1 -20   1    5.30    3.50
   1 -20   1    5.60    1.70
  -1 -20  -1    8.90    2.90
  -1 -20  -1   -0.20    3.40
  -1 -20   1   -1.90    3.60
  -1 -20   1    9.10    3.00
   1 -20  -1    7.00    3.40
   2 -20   1    9.20    3.50
  -2 -20  -1   11.70    3.40
   2 -20  -1    5.80    3.50
   2 -20  -1   -0.50    4.10
  -2 -20   1    0.50    3.70
  -2 -20   1   10.90    3.40
   3 -20   1   -5.90    5.50
   3 -20   1    2.80    3.10
  -3 -20  -1   -3.10    3.10
   3 -20  -1   -4.90    4.60
  -3 -20   1    0.60    3.20
   3 -20  -1   -0.60    3.00
   4 -20   1    4.90    6.30
  -4 -20  -1    9.60    3.40
   4 -20   1    5.90    3.10
   4 -20  -1   -6.70    6.30
  -4 -20   1    6.80    3.20
   4 -20  -1    4.00    3.10
  -5 -20  -1    3.70    2.90
   5 -20   1    0.10    2.50
  -5 -20   1    2.40    2.80
   5 -20  -1    0.60    2.80
   6 -20   1    5.00    2.50
  -6 -20  -1    3.70    2.30
   6 -20  -1    4.40    2.70
   0 -21  -1   -0.70    3.60
   0 -21  -1   -4.00    3.50
   0 -21   1    0.40    1.60
   0 -21   1   -1.20    3.40
   0 -21  -1    1.40    1.30
  -1 -21  -1    2.90    2.20
  -1 -21  -1   -1.70    3.50
   1 -21   1   -1.50    3.20
   1 -21  -1    2.10    2.60
  -1 -21   1   -1.20    3.20
  -1 -21   1    5.50    2.40
   1 -21  -1   -2.10    3.30
   2 -21   1    4.10    2.50
  -2 -21  -1    0.70    3.50
  -2 -21  -1    7.10    2.70
   2 -21   1    2.10    4.20
   2 -21  -1    6.20    2.70
   2 -21  -1   -1.90    4.30
  -2 -21   1   11.50    2.90
  -2 -21   1    5.20    3.80
  -3 -21  -1   11.30    2.90
   3 -21   1    3.90    5.80
   3 -21   1    8.60    2.80
  -3 -21   1   13.30    3.00
   3 -21  -1    9.70    2.70
  -4 -21  -1    1.10    2.50
   4 -21   1   -0.10    2.00
   4 -21   1   11.40    5.20
   4 -21  -1    5.50    6.00
   4 -21  -1   -3.60    2.10
  -4 -21   1   -1.20    2.30
   1 -22   1   -1.50    3.30
  -1 -22  -1   -0.70    3.30
   1 -22  -1   -1.70    1.80
  -1 -22   1    0.90    3.30
  -1 -22   1    1.00    1.40
   1 -22  -1   -1.30    3.00
   2 -22   1   -0.60    3.60
  -2 -22  -1   -2.10    3.40
  -2 -22   1   17.40    2.90
   2 -22  -1    2.90    4.20
  -2 -22   1   -0.60    3.60
   3 -22   1   -1.20    4.70
  -3 -22  -1    5.00    2.00
   3 -22   1    6.50    2.60
   3 -22  -1    2.60    1.80
  -3 -22   1    5.20    2.20
   3 -22  -1    0.10    4.20
   0   0  -2  -12.20    0.60
   0   0   2  -11.60    0.60
   0   0  -2  -11.70    0.60
   1   0   2   -8.80    0.90
   1   0  -2   -8.90    0.60
  -1   0  -2   -8.30    0.80
  -2   0   2    3.80    1.20
   2   0  -2    1.10    0.90
   2   0   2    2.00    1.60
  -2   0  -2    3.70    1.50
   3   0   2   10.70    2.00
   3   0  -2   11.30    2.00
   3   0  -2   12.50    1.70
  -3   0  -2   11.00    1.90
   3   0   2   13.00    1.90
   3   0   2   11.20    2.10
   4   0   2    2.10    1.50
   4   0   2    2.40    2.10
   4   0  -2    2.60    1.50
   4   0  -2    3.40    1.70
   5   0   2    6.10    2.30
   5   0   2    3.60    1.50
   5   0  -2    1.70    1.80
   5   0  -2    4.40    1.90
   5   0   2    3.20    2.40
   5   0  -2    2.80    1.90
   6   0  -2    3.40    1.70
   6   0  -2   -2.40    1.80
   6   0  -2    2.70    1.70
   6   0   2    4.10    2.60
   6   0   2    1.40    1.70
   7   0   2   98.09    6.40
   7   0   2   94.79    5.80
   7   0  -2   96.19    5.50
   7   0  -2   96.49    6.00
   8   0   2   25.20    3.90
   8   0  -2   12.40    3.10
   9   0   2   69.09    5.00
   9   0  -2   74.29    3.90
   9   0  -2   84.99    6.20
   9   0   2   70.49    5.70
  10   0   2    0.20    4.60
  10   0   2    4.80    1.50
  10   0  -2   10.80    5.20
  11   0  -2    1.40    3.40
  11   0   2    0.10    3.00
  12   0  -2    0.40    2.60
  12   0   2    0.20    2.60
   0  -1  -2   40.20    2.10
   0  -1  -2   45.70    2.10
   0   1  -2   40.50    2.30
   0   1  -2   36.50    2.30
   0  -1   2   41.40    2.30
   1  -1   2   72.49    3.60
   1   1  -2   73.79    3.60
   1   1  -2   73.49    3.70
  -1  -1  -2   76.29    3.70
  -1  -1   2   72.09    3.60
  -1   1  -2   72.89    3.60
   1   1   2   75.49    3.80
   2   1  -2   52.19    3.40
  -2  -1  -2   50.19    3.40
   2  -1   2   45.80    3.10
   2   1  -2   50.59    3.00
   2  -1   2   52.29    3.30
   2  -1  -2   51.69    2.50
   2  -1  -2   47.70    2.60
  -2  -1   2   52.39    3.60
   2   1   2   53.89    3.70
   3  -1   2   43.90    2.90
   3   1  -2   43.20    2.90
   3   1  -2   47.70    3.80
   3  -1   2   42.30    3.30
   3  -1   2   46.40    3.70
  -3  -1  -2   41.10    3.60
   3   1  -2   43.90    3.10
   3  -1  -2   44.60    3.00
   3   1   2   48.40    4.00
  -3  -1   2   50.69    4.40
   3  -1  -2   43.00    2.70
   3  -1  -2   43.90    2.70
   3   1   2   47.30    4.00
   4   1  -2   49.20    3.30
   4  -1   2   45.50    3.90
   4   1  -2   47.80    4.10
   4  -1   2   48.60    3.20
   4  -1  -2   50.39    3.40
   4  -1  -2   44.90    3.30
   4   1   2   49.70    4.50
   4   1   2   42.10    3.20
   5  -1   2   26.20    2.70
   5   1  -2   24.20    2.90
   5   1  -2   27.20    3.60
   5   1  -2   21.00    2.70
   5  -1   2   23.70    4.10
   5  -1   2   25.90    3.90
   5   1   2   20.90    2.70
   5  -1  -2   24.60    3.40
   5  -1  -2   23.90    2.90
   5  -1  -2   24.70    3.10
   5   1   2   30.00    3.90
   5   1   2   25.00    4.00
   6  -1   2  209.78   10.00
   6   1  -2  218.38   10.30
   6  -1   2  211.38   10.40
   6   1  -2  205.18   10.40
   6   1  -2  210.18   10.20
   6  -1   2  208.98   10.70
   6   1   2  217.18   10.80
   6  -1  -2  208.48    9.50
   6   1   2  211.58   10.10
   6  -1  -2  207.18   10.20
   6  -1  -2  208.58    9.90
   7  -1   2   93.89    5.80
   7  -1   2   98.99    6.10
   7   1  -2   94.09    6.00
   7   1  -2   85.29    6.10
   7   1   2   98.19    6.60
   7  -1  -2   94.79    6.20
   7   1   2   97.09    6.00
   8  -1   2  128.89    7.80
   8  -1   2  134.09    8.50
   8  -1  -2  140.99    8.10
   8   1   2  133.79    8.10
   8   1   2  137.29    7.80
   9   1  -2    6.90    5.80
   9  -1   2    6.50    2.80
   9   1  -2   11.00    3.10
   9   1  -2    4.30    1.80
   9   1  -2   14.60    4.20
   9  -1   2   10.20    2.10
   9  -1   2   25.80    6.70
   9  -1  -2   33.50    8.60
   9  -1  -2    5.60    2.80
   9   1   2    4.60    3.60
   9   1   2    9.50    2.40
  10   1  -2    2.90    5.10
  10  -1   2    2.00    4.70
  10   1   2   -2.10    3.80
  10   1   2    3.10    1.70
  10  -1  -2    9.20    5.30
  11   1  -2    0.70    3.50
  11  -1   2   -1.00    3.20
  11  -1  -2    3.10    3.60
  11   1   2   -2.20    3.10
  12   1  -2    0.00    2.60
  12  -1   2    1.20    2.40
  12   1   2   -0.50    2.30
   0  -2  -2  369.16   14.60
   0  -2  -2  342.57   14.60
   0   2  -2  344.67   14.80
   0  -2   2  359.26   14.80
  -1  -2  -2   12.60    2.10
   1  -2   2   12.00    1.90
   1  -2   2   11.10    1.90
   1   2  -2   12.00    1.70
  -1   2  -2    8.60    1.30
  -1  -2   2    4.80    1.70
  -1  -2   2    6.10    1.40
   1   2   2    8.50    1.60
   1  -2  -2    7.30    0.80
   1  -2  -2    5.30    0.70
   2  -2   2  300.07   12.90
   2   2  -2  310.07   13.10
   2  -2   2  288.97   12.80
  -2  -2  -2  292.57   13.00
   2  -2  -2  291.97   12.30
   2   2   2  303.07   13.10
   2  -2  -2  310.67   12.30
  -2  -2   2  305.57   13.00
   3  -2   2   33.90    2.50
   3   2  -2   37.30    3.60
   3  -2   2   34.40    3.10
   3  -2   2   33.60    2.90
  -3  -2  -2   31.60    3.40
   3   2  -2   33.40    2.70
   3   2   2   30.00    3.90
  -3  -2   2   35.80    4.40
   3  -2  -2   26.70    2.60
   3  -2  -2   27.40    2.50
   3  -2  -2   26.60    2.00
   4  -2   2   46.50    3.70
   4   2  -2   47.00    3.40
   4   2  -2   48.60    4.30
   4  -2   2   48.80    3.40
   4   2   2   45.30    5.30
   4  -2  -2   44.50    3.30
   4   2   2   39.80    4.50
   4  -2  -2   53.09    2.90
   4  -2  -2   41.50    2.90
   4   2   2   43.20    3.10
   5  -2   2   57.49    3.90
   5   2  -2   56.19    4.10
   5   2  -2   56.59    4.80
   5   2  -2   63.39    4.90
   5  -2   2   56.29    4.70
   5  -2   2   65.29    4.60
   5  -2  -2   59.89    4.40
   5   2   2   60.69    5.40
   5  -2  -2   61.19    3.80
   5   2   2   57.89    3.90
   5   2   2   54.39    5.60
   6  -2   2  181.98    9.10
   6   2  -2  180.68    9.30
   6  -2   2  164.38    8.70
   6   2  -2  177.28    9.10
   6  -2   2  171.28    8.60
   6   2  -2  163.38    8.60
   6   2   2  164.38    9.30
   6  -2  -2  167.18    8.20
   6   2   2  174.48    8.60
   6   2   2  171.98    9.40
   6  -2  -2  189.68    9.00
   7  -2   2  149.79    7.80
   7   2  -2  126.29    7.50
   7   2  -2  143.29    8.00
   7  -2   2  129.29    7.30
   7   2   2  146.29    7.60
   7  -2  -2  136.29    7.80
   7   2   2  141.09    8.50
   8   2  -2   31.10    4.30
   8   2  -2   35.80    4.40
   8  -2   2   31.10    4.20
   8  -2  -2   30.30    4.40
   8   2   2   29.90    5.00
   9  -2   2   19.80    4.90
   9  -2   2   12.60    2.50
   9   2  -2    7.80    5.00
   9  -2   2   15.80    3.20
   9   2  -2    6.70    2.70
   9   2  -2   18.40    4.70
   9   2  -2   14.60    2.40
   9  -2  -2   16.50    3.60
   9   2   2   14.70    3.10
   9   2   2   15.80    2.90
  10   2  -2   45.90    8.00
  10   2   2   48.20    7.30
  11   2  -2   -9.30    4.80
  11   2  -2    0.20    3.20
  11  -2   2   -3.10    3.00
  11   2   2   -1.40    3.00
  12   2  -2    0.90    2.50
  12  -2   2   -0.30    2.40
  12   2   2    0.80    2.40
   0  -3   2  702.03   27.80
   0  -3  -2  696.93   27.50
   0   3  -2  651.73   27.70
   0  -3  -2  636.84   27.60
   1  -3   2   47.10    3.00
   1   3  -2   40.30    3.40
   1  -3   2   45.00    3.10
  -1  -3  -2   46.30    3.20
  -1  -3  -2   44.90    4.00
  -1  -3   2   40.70    4.10
  -1   3  -2   46.70    3.00
   1  -3  -2   35.00    2.20
  -1  -3   2   44.40    3.30
   1   3   2   41.90    3.20
   2  -3   2 1081.19   43.30
   2   3  -2 1073.49   43.70
   2  -3   2 1043.80   43.30
  -2  -3  -2 1066.59   43.60
   2   3   2 1058.49   43.70
   2  -3  -2 1042.70   42.80
  -2  -3   2 1044.10   43.60
   3   3  -2   42.60    4.10
  -3  -3  -2   44.90    4.00
   3  -3   2   41.20    3.40
   3   3  -2   41.60    2.90
   3  -3   2   44.00    3.00
   3  -3  -2   41.30    3.00
   3  -3  -2   44.20    2.40
   3  -3  -2   48.10    2.60
   3   3   2   49.60    4.80
  -3  -3   2   51.79    5.70
   4  -3   2   26.30    2.60
   4   3  -2   24.70    2.50
   4   3  -2   27.10    3.90
   4  -3   2   25.50    2.90
   4  -3  -2   28.30    2.00
  -4  -3   2   26.20    5.30
   4   3   2   20.00    2.30
   4  -3  -2   21.10    2.00
   4  -3  -2   23.40    3.00
   4   3   2   29.70    3.90
   5   3  -2    2.00    2.20
   5  -3   2    2.40    1.70
   5   3  -2    1.20    1.70
   5  -3   2    3.30    1.90
   5   3  -2    0.20    1.90
   5  -3   2    2.00    1.70
   5  -3  -2    2.20    1.30
   5  -3  -2    4.00    2.10
   5   3   2    1.10    1.50
   5   3   2   -0.50    2.50
   5   3   2    3.40    2.30
   6  -3   2   47.80    4.00
   6  -3   2   43.30    4.30
   6  -3   2   41.20    4.00
   6   3  -2   40.90    3.90
   6   3  -2   38.80    4.90
   6   3  -2   45.40    5.00
   6   3   2   45.20    3.60
   6   3   2   43.80    4.90
   6  -3  -2   46.20    4.20
   6  -3  -2   39.70    2.90
   6   3   2   46.30    5.10
   7   3  -2  128.19    7.50
   7  -3   2  130.59    7.40
   7   3  -2  124.19    7.90
   7  -3  -2  132.49    7.60
   7   3   2  141.49    8.50
   7   3   2  123.59    7.50
   8   3  -2   13.20    3.00
   8   3  -2   17.30    3.00
   8  -3   2   24.50    4.00
   8   3   2   15.70    3.50
   8  -3  -2   15.40    3.20
   9   3  -2   28.60    3.80
   9   3  -2   29.60    5.20
   9  -3   2   36.40    4.70
   9  -3   2   34.90    5.80
   9  -3   2   42.60    6.40
   9   3  -2   33.50    4.60
   9   3   2   33.30    5.20
   9   3   2   35.90    6.10
   9   3   2   31.20    4.60
   9  -3  -2   36.60    4.80
  10  -3   2    5.80    4.40
  10   3  -2   15.90    4.90
  10   3  -2   13.30    2.60
  10   3   2   18.80    4.80
  10   3   2   14.00    2.50
  11  -3   2    0.20    3.20
  11   3  -2   -2.60    2.90
  11   3  -2   -2.20    4.40
  11   3   2   -2.70    2.80
  11   3   2   -2.60    4.30
  12   3  -2   -0.40    2.30
  12   3   2   -0.60    2.10
   0  -4  -2  392.36   15.80
   0  -4   2  382.06   16.60
   0   4  -2  358.56   16.00
   0  -4   2  385.26   16.00
   0  -4  -2  346.57   15.80
   1  -4   2  479.25   19.50
  -1  -4  -2  510.45   19.70
   1   4  -2  463.95   19.80
  -1  -4  -2  470.35   20.50
   1  -4   2  459.45   19.50
  -1   4  -2  493.95   20.00
  -1  -4   2  459.85   19.70
   1   4   2  464.75   19.70
  -1   4  -2  450.15   19.90
  -1  -4   2  450.85   20.50
   1  -4  -2  438.26   19.30
   1  -4  -2  430.06   19.20
   2  -4   2  110.69    5.50
  -2  -4  -2  105.69    7.10
   2  -4   2  106.09    5.40
   2   4  -2  110.79    6.10
  -2  -4  -2  101.99    5.80
   2  -4   2   99.39    5.10
  -2  -4   2  104.19    5.90
   2  -4  -2   96.69    4.60
   2   4   2   97.29    5.70
   2  -4  -2  103.69    4.60
   3   4  -2  135.09    6.50
   3  -4   2  132.89    6.50
  -3  -4  -2  135.19    7.50
   3   4  -2  139.49    7.60
   3   4   2  151.38    7.30
  -3  -4   2  155.88   10.00
   3  -4  -2  127.49    6.40
   3  -4  -2  139.99    5.90
   3  -4  -2  130.79    5.90
   4  -4   2   25.50    2.80
   4   4  -2   24.00    2.80
   4   4  -2   27.10    4.00
   4  -4   2   29.80    2.80
   4   4   2   26.60    4.00
   4  -4  -2   23.90    1.80
   4  -4  -2   23.10    2.70
   4   4   2   26.60    2.40
  -4  -4   2   21.70    3.80
   4  -4  -2   33.30    1.80
   5   4  -2  168.18    8.20
   5  -4   2  171.98    8.20
   5   4  -2  169.88    9.00
   5   4  -2  175.08    9.20
   5  -4   2  158.58    8.00
   5  -4   2  167.48    8.10
   5  -4  -2  178.68    8.40
   5   4   2  151.98    9.10
   5  -4  -2  160.48    7.10
   5   4   2  159.18    7.90
   5   4   2  169.58    9.50
   6  -4   2   60.79    4.60
   6   4  -2   58.79    5.40
   6  -4   2   67.99    4.20
   6   4  -2   57.29    4.30
   6  -4   2   54.69    4.70
   6   4  -2   52.89    5.40
   6   4   2   50.89    5.60
   6  -4  -2   71.29    4.90
   6   4   2   64.79    5.80
   7   4  -2   61.69    6.00
   7   4  -2   61.79    5.00
   7  -4   2   59.39    4.90
   7  -4  -2   59.29    5.10
   7   4   2   66.89    6.60
   8   4  -2  161.88    9.20
   8  -4   2  148.89    8.90
   8   4  -2  154.18    8.90
   8  -4  -2  160.68    9.10
   8   4   2  167.78    9.90
   9  -4   2   43.80    6.30
   9   4  -2   44.80    4.80
   9   4  -2   38.20    7.40
   9  -4   2   53.89    7.60
   9  -4   2   40.60    6.10
   9   4  -2   45.40    4.40
   9   4   2   43.40    5.80
   9   4   2   39.60    4.90
   9   4   2   44.10    6.20
  10  -4   2   40.30    5.70
  10   4  -2   43.60    3.80
  10   4  -2   39.90    7.60
  10   4   2   48.60    4.60
  10   4   2   56.39    7.60
  11  -4   2    0.60    4.40
  11   4  -2    0.90    4.40
  11   4  -2   -0.10    2.90
  11   4   2    5.20    4.50
  11   4   2   -2.80    2.60
  11   4   2   -0.50    1.40
  12   4  -2   -0.30    2.20
  12   4  -2    7.70    4.00
  12   4   2    4.70    4.00
   0   5  -2 1022.40   44.30
   0  -5  -2  991.50   44.10
   0  -5   2 1095.09   45.10
   0  -5   2 1115.79   44.30
   0  -5  -2 1144.79   44.10
   1  -5   2  246.78   10.80
   1   5  -2  224.88   11.00
   1  -5   2  223.58   10.80
   1  -5   2  225.38   11.50
  -1  -5  -2  258.57   10.90
  -1  -5  -2  239.78   12.30
  -1  -5   2  243.58   11.10
   1   5   2  238.68   11.10
  -1  -5   2  247.48   12.30
   2  -5   2   57.29    3.50
  -2  -5  -2   57.79    6.00
   2   5  -2   60.79    4.50
   2  -5   2   61.39    4.00
  -2  -5  -2   57.19    4.60
   2   5  -2   54.99    3.30
   2  -5  -2   57.29    3.20
   2   5   2   56.59    4.80
   2  -5  -2   53.49    3.30
   2  -5  -2   56.29    3.20
  -2  -5   2   59.09    4.40
   3  -5   2  147.19    6.90
   3   5  -2  151.48    8.00
   3   5  -2  144.49    6.90
   3  -5   2  156.78    7.00
  -3  -5  -2  136.29    7.70
  -3  -5   2  157.48   11.10
   3  -5  -2  136.49    6.20
   3   5   2  127.79    6.50
   3  -5  -2  143.89    6.30
   3   5   2  153.28    8.10
   3  -5  -2  142.49    6.80
   4   5  -2   82.49    4.90
   4  -5   2   88.59    4.90
   4  -5   2   97.89    5.10
   4   5  -2   87.29    6.30
   4   5  -2   83.09    6.30
  -4  -5   2   99.89    8.60
   4   5   2   81.69    4.60
   4   5   2   82.79    8.10
   4   5   2   87.69    6.30
   4  -5  -2   93.19    5.00
   5  -5   2   68.79    4.40
   5   5  -2   76.79    6.00
   5  -5   2   73.89    4.60
   5   5  -2   65.19    4.60
   5   5  -2   72.29    5.90
   5  -5   2   78.19    4.70
   5   5   2   60.89    5.90
   5  -5  -2   77.49    5.00
   5   5   2   75.49    6.30
   6  -5   2    4.40    2.00
   6   5  -2    3.80    2.50
   6   5  -2    2.20    1.90
   6  -5   2    4.10    2.00
   6   5  -2    6.30    2.90
   6   5   2    8.00    2.90
   6   5   2    1.10    2.80
   6  -5  -2    5.60    2.40
   7  -5   2   14.00    2.90
   7   5  -2   11.60    2.60
   7   5  -2   12.00    3.30
   7  -5  -2   14.00    3.00
   7   5   2   17.20    3.70
   8  -5   2   21.80    3.40
   8   5  -2   20.00    5.10
   8   5  -2   22.40    3.80
   8  -5  -2   24.30    3.70
   8   5   2   21.10    4.20
   9   5  -2   13.10    3.30
   9  -5   2   13.40    4.40
   9   5  -2   16.70    2.90
   9   5  -2   13.80    4.40
   9   5  -2   10.70    3.10
   9   5   2   18.50    3.80
   9   5   2   11.50    2.90
   9   5   2   11.00    3.50
  10   5  -2   15.40    4.90
  10   5  -2    0.20    3.10
  10   5  -2    8.40    2.20
  10  -5   2    9.60    3.70
  10   5   2    5.00    3.00
  10   5   2    8.10    2.60
  10   5   2    9.50    4.50
  11   5  -2   -0.90    2.60
  11   5  -2    4.30    4.50
  11   5   2    3.40    4.40
  11   5   2    1.50    1.70
  11   5   2   -0.60    2.70
  12   5  -2    1.00    2.20
  12   5  -2    2.60    3.70
  12   5   2   -1.20    3.60
  12   5   2   -0.20    2.00
   0  -6   2  213.28   11.00
   0  -6  -2  176.48   10.90
   0   6  -2  199.28    9.80
   0  -6   2  222.08    9.90
   0  -6  -2  216.48    9.60
  -1  -6  -2  105.99    8.50
   1   6  -2  103.99    5.40
   1   6  -2  116.69    6.60
   1  -6   2  106.59    7.00
   1  -6   2  116.79    6.10
  -1  -6  -2  120.89    6.30
   1   6   2   79.09    8.40
  -1  -6   2  112.09    7.60
   1  -6  -2  116.19    5.30
  -1  -6   2  121.89    6.60
  -2  -6  -2   10.70    2.50
   2   6  -2   13.50    2.10
   2  -6   2   10.70    2.10
   2   6  -2   10.10    2.60
   2  -6   2    8.60    1.80
  -2  -6  -2    5.70    3.00
  -2  -6   2    7.30    2.50
   2  -6  -2   13.90    2.20
   2  -6  -2    9.10    1.50
   2  -6  -2   11.50    1.90
   2   6   2   11.70    2.70
   3  -6   2   21.00    2.70
   3   6  -2   15.40    3.20
   3  -6   2   15.70    2.40
   3   6  -2   13.20    2.40
  -3  -6  -2   18.80    3.50
   3  -6  -2   24.30    2.00
   3   6   2   22.60    3.50
   3  -6  -2   20.60    1.90
   3  -6  -2   22.60    2.40
  -3  -6   2   21.30    5.30
   4   6  -2   56.79    3.90
   4  -6   2   54.39    4.00
   4   6  -2   63.39    5.50
   4  -6   2   60.89    4.10
   4   6  -2   58.49    5.70
   4  -6   2   59.09    4.20
  -4  -6   2   56.89    8.60
   4   6   2   61.79    5.30
   4  -6  -2   59.69    3.90
   4   6   2   59.69    5.80
   5   6  -2   33.50    4.70
   5  -6   2   34.00    3.60
   5  -6   2   32.00    3.00
   5   6  -2   34.00    3.30
   5   6  -2   30.90    5.20
   5  -6   2   35.40    3.40
   5   6   2   34.10    4.90
   5   6   2   31.30    4.40
   5  -6  -2   36.10    3.70
   6  -6   2   28.80    3.70
   6   6  -2   22.60    3.90
   6  -6   2   28.80    3.70
   6   6  -2   29.20    4.80
   6   6  -2   32.50    3.60
   6   6   2   40.40    5.70
   6  -6  -2   26.70    3.80
   6   6   2   28.50    5.70
   7  -6   2   46.40    4.70
   7   6  -2   53.49    6.00
   7   6  -2   46.10    4.80
   7  -6  -2   54.19    4.90
   7   6   2   41.60    6.60
   8   6  -2   10.30    3.30
   8   6  -2    9.70    4.60
   8  -6   2    5.20    3.00
   8  -6   2   11.20    4.10
   8  -6  -2    8.30    2.90
   8   6   2   11.40    3.80
   9   6  -2  116.09    8.10
   9   6  -2  119.49    7.20
   9  -6   2  108.29    8.50
   9   6  -2  111.99    9.60
   9   6  -2  119.69    7.90
   9   6   2  109.39    7.20
   9   6   2  117.09    8.40
   9   6   2  107.49    8.40
  10   6  -2   19.30    4.90
  10  -6   2   11.60    3.80
  10   6  -2    9.50    2.40
  10   6   2    9.00    2.70
  10   6   2   11.80    3.30
  10   6   2   18.90    5.10
  11   6  -2   38.70    7.00
  11  -6   2   23.80    5.10
  11   6   2   42.60    7.10
  11   6   2   35.00    3.40
  12   6  -2   -2.10    1.80
  12   6  -2    6.90    3.50
  12   6   2   -0.60    3.60
  12   6   2   -0.70    1.70
   0  -7  -2   31.30    3.50
   0  -7   2   24.40    5.20
   0  -7   2   38.30    4.00
  -1  -7  -2   11.70    2.60
   1   7  -2   10.20    1.70
  -1  -7  -2    8.30    3.40
   1  -7   2    9.30    2.30
  -1  -7   2   10.60    2.70
   1  -7  -2   13.80    2.00
   2   7  -2   23.20    2.40
  -2  -7  -2   18.00    3.80
   2  -7   2   23.90    3.30
  -2  -7  -2   30.80    4.20
  -2  -7   2   30.20    4.20
   2  -7  -2   23.50    2.50
   2  -7  -2   23.90    2.70
   3  -7   2    6.60    1.80
   3   7  -2    4.30    2.70
   3  -7   2    6.00    1.90
   3  -7   2    8.30    1.90
   3   7  -2    8.00    1.70
  -3  -7   2    4.40    4.40
   3  -7  -2    4.70    1.30
   3  -7  -2    5.70    1.70
   4   7  -2   -0.30    2.60
   4  -7   2   -0.30    1.50
   4  -7   2    1.70    1.70
   4   7  -2    2.30    2.60
   4   7  -2    1.10    1.60
   4  -7   2    0.10    1.70
   4   7   2    0.30    2.50
  -4  -7   2   -0.30    3.70
   4  -7  -2    1.30    1.60
   5   7  -2    8.40    2.90
   5   7  -2    8.50    2.10
   5  -7   2   11.30    2.20
   5  -7   2    6.40    1.90
   5   7  -2    7.80    3.00
   5  -7  -2    8.50    2.20
   5   7   2   11.50    3.40
   6   7  -2    3.80    3.10
   6  -7   2    0.10    2.00
   6   7  -2    0.50    2.90
   6   7  -2    1.20    2.10
   6  -7  -2   -0.70    2.20
   6   7   2    0.70    3.20
   7   7  -2   16.10    3.80
   7  -7   2   19.70    3.20
   7   7   2   20.00    4.50
   7  -7  -2   23.80    4.00
   8   7  -2   26.50    5.30
   8   7  -2   18.80    4.10
   8   7  -2   17.50    3.40
   8  -7   2   14.90    3.10
   8   7  -2   18.60    3.80
   8  -7   2   17.70    4.70
   8   7   2   14.80    3.70
   8  -7  -2   13.20    4.20
   8  -7  -2   14.30    3.30
   8   7   2   10.20    3.50
   8   7   2   12.50    4.20
   9   7  -2   23.40    4.90
   9   7  -2   22.80    3.90
   9   7  -2   25.00    4.10
   9   7  -2   17.20    3.30
   9  -7   2   26.60    4.70
   9   7   2   27.90    4.90
   9   7   2   29.40    4.60
   9   7   2   19.50    3.90
  10   7  -2    5.00    3.00
  10   7  -2   -2.60    2.70
  10   7  -2    5.20    2.40
  10  -7   2    2.00    3.50
  10   7  -2    6.70    4.30
  10   7   2   -0.50    2.80
  10   7   2   12.40    4.80
  10   7   2    8.80    3.20
  10   7   2   10.00    2.70
  11   7  -2   21.40    4.90
  11  -7   2   13.30    3.20
  11   7   2   18.70    3.00
  11   7   2   22.80    4.80
   0  -8   2   32.60    6.10
   0  -8   2   43.70    4.40
   0  -8  -2   39.70    3.90
  -1  -8  -2    4.30    4.00
   1  -8   2   13.20    2.50
   1   8  -2   11.10    1.80
  -1  -8  -2   10.90    2.40
  -1  -8   2    9.80    2.70
   1  -8  -2   14.80    2.30
  -2  -8  -2   10.20    2.70
   2  -8   2   17.30    3.20
  -2  -8  -2    9.50    2.60
   2  -8   2   16.10    2.50
  -2  -8  -2    6.10    3.10
   2   8  -2   11.50    1.80
  -2  -8   2   11.90    2.90
   2  -8  -2   12.50    2.10
   2  -8  -2   14.70    2.00
   3  -8   2    8.10    1.90
   3   8  -2   10.20    3.50
   3  -8   2    7.90    2.00
   3   8  -2    8.00    1.80
  -3  -8  -2    3.50    2.40
   3  -8   2    8.40    1.90
   3  -8  -2    7.50    1.40
  -3  -8   2    2.90    5.40
   3  -8  -2    5.00    1.80
   4   8  -2    4.60    1.90
   4  -8   2    3.30    1.80
   4  -8   2    3.50    1.50
   4   8  -2    4.60    3.30
   4  -8   2    3.80    1.80
   4   8   2    9.00    3.30
   4  -8  -2    5.80    2.10
  -4  -8   2    2.00    4.10
   5   8  -2   -0.20    3.00
   5  -8   2    4.90    1.80
   5  -8   2    6.70    2.10
   5   8   2    4.10    3.10
   5  -8  -2    5.90    2.10
   6  -8   2    8.20    2.60
   6   8  -2    7.10    3.30
   6   8   2    8.80    3.50
   6  -8  -2    6.70    2.50
   7   8  -2   11.90    3.70
   7  -8   2   17.00    3.30
   7   8   2   19.40    4.80
   7  -8  -2   13.20    3.30
   8   8  -2   27.80    5.00
   8   8  -2   24.30    4.20
   8   8  -2   17.60    4.80
   8  -8   2   26.50    4.40
   8  -8   2   30.80    5.50
   8   8  -2   30.30    4.90
   8   8   2   20.60    4.90
   8  -8  -2   27.00    5.10
   8   8   2   23.40    4.20
   8  -8  -2   23.50    3.90
   9  -8   2   13.00    4.10
   9   8  -2   26.20    5.30
   9   8  -2   12.10    3.20
   9   8  -2   13.70    3.40
   9   8  -2   20.50    4.00
   9   8   2   15.00    3.40
   9   8   2   13.20    3.80
   9   8   2   15.00    5.10
   9   8   2   16.80    4.10
   9  -8  -2   10.60    4.00
  10   8  -2    2.30    2.30
  10   8  -2    4.60    3.10
  10  -8   2    4.80    3.50
  10   8  -2    0.70    2.80
  10   8  -2    3.20    4.00
  10   8   2   -0.60    2.60
  10   8   2    6.00    4.30
  10   8   2    2.50    3.20
  10   8   2    3.70    2.60
  11   8  -2   19.50    2.50
  11  -8   2   14.60    3.10
  11   8  -2   24.30    4.90
  11   8   2   17.50    3.00
  11   8   2   16.50    4.40
  11   8   2   15.30    3.00
   0  -9   2  163.98    8.70
   0  -9  -2  168.68    8.40
   0  -9   2  159.78    8.70
   0  -9  -2  146.79    7.90
   2   9  -2   43.60    3.40
   2  -9   2   47.60    4.40
  -2  -9  -2   37.10    6.70
  -2  -9  -2   51.39    5.20
  -2  -9  -2   38.40    3.30
   2  -9   2   47.60    4.30
  -2  -9  -2   44.10    5.00
   2  -9  -2   45.90    3.60
   2  -9  -2   41.00    3.40
  -2  -9   2   43.90    7.40
  -2  -9   2   37.10    5.40
  -2  -9   2   52.99    5.30
   3  -9   2   44.10    3.80
   3  -9   2   35.90    3.70
   3   9  -2   48.20    6.00
   3   9  -2   33.60    3.30
  -3  -9  -2   43.60    5.30
  -3  -9  -2   33.40    3.10
   3  -9  -2   35.20    3.30
  -3  -9   2   46.50    7.90
   3  -9  -2   38.40    2.90
  -3  -9   2   38.50    5.30
   4  -9   2    4.10    1.60
   4  -9   2    3.10    1.80
  -4  -9  -2    3.20    2.70
   4   9  -2    0.00    2.90
  -4  -9   2    2.60    4.60
   4  -9  -2    3.70    2.00
   5   9  -2    7.20    3.30
  -5  -9  -2    5.60    2.10
   5  -9   2    5.50    2.10
   5   9   2    1.00    3.50
   5  -9  -2    6.20    2.30
   6  -9   2   -1.90    2.10
   6   9  -2   -2.50    2.90
  -6  -9  -2    8.80    2.40
   6  -9  -2    2.40    2.40
   6   9   2    4.30    3.70
   7  -9   2   -0.70    4.00
   7   9  -2    1.50    4.20
   7   9  -2    1.90    3.40
   7  -9   2   -0.30    2.50
   7  -9  -2    3.10    2.70
   7   9   2    3.90    4.00
   8   9  -2    3.70    3.10
   8   9  -2    7.40    4.30
   8  -9   2   -1.60    3.70
   8   9  -2    5.70    3.30
   8   9  -2    3.00    4.30
   8   9  -2   -0.30    3.10
   8   9   2   -1.90    4.10
   8   9   2   -0.40    3.00
   8  -9  -2    0.90    3.90
   8   9   2   -0.70    3.10
   9   9  -2    1.40    2.80
   9   9  -2    5.80    4.00
   9   9  -2    0.60    3.20
   9   9  -2   -1.90    2.30
   9  -9   2    9.00    3.90
   9   9  -2    1.10    3.10
   9   9   2    8.00    3.50
   9   9   2   -0.20    2.50
   9   9   2    1.50    3.60
   9   9   2    4.30    3.00
   9   9   2   16.60    5.10
   9  -9  -2    7.00    3.70
  10   9  -2    5.60    2.40
  10   9  -2    6.10    3.00
  10   9  -2   -0.50    2.30
  10   9  -2    6.20    4.30
  10  -9   2    3.50    3.30
  10   9   2    4.70    3.20
  10   9   2    0.30    2.40
  10   9   2    1.10    2.50
  10   9   2    2.40    4.20
  11   9  -2   -3.20    3.30
  11   9  -2    0.00    1.70
  11   9  -2    2.80    1.40
  11  -9   2    2.90    2.50
  11   9   2    0.30    1.70
  11   9   2   -0.80    3.30
  11   9   2   -0.20    2.40
  11   9   2   -0.60    1.80
   0 -10   2  116.19    7.30
   0 -10   2  118.89    5.80
   0 -10  -2  106.59    6.60
   0 -10   2  113.49    7.30
   0 -10  -2  122.69    7.20
   0 -10  -2  117.69    5.80
  -1 -10  -2    4.30    2.50
   1  10  -2    4.50    1.60
   1 -10   2    7.20    2.60
  -1 -10  -2    2.50    2.20
  -1 -10  -2    6.20    1.90
   1 -10   2    5.50    2.20
  -1 -10   2    8.50    2.80
  -1 -10   2    3.30    2.70
   1 -10  -2    5.30    2.10
   1 -10  -2    5.00    1.60
   1 -10  -2    7.60    2.30
  -2 -10  -2   31.20    4.90
   2 -10   2   34.80    4.00
   2 -10   2   34.30    4.20
   2  10  -2   30.50    3.10
  -2 -10  -2   33.70    4.80
  -2 -10  -2   35.90    3.30
  -2 -10   2   31.70    5.00
  -2 -10   2   18.30    6.90
   2 -10  -2   35.80    3.30
   2 -10  -2   33.60    3.40
   3 -10   2  109.49    6.30
   3 -10   2  102.49    6.40
  -3 -10  -2  124.09    8.00
  -3 -10  -2  116.59    6.00
   3 -10  -2  105.39    5.70
  -3 -10   2  125.49    8.10
  -3 -10   2  115.59   12.90
   4 -10   2   30.50    3.50
   4  10  -2   42.40    6.30
  -4 -10  -2   46.10    6.00
  -4 -10  -2   29.30    3.50
  -4 -10   2   41.70    8.20
   4 -10  -2   40.80    3.70
   5  10  -2   62.09    7.10
  -5 -10  -2   49.99    4.10
   5  10   2   27.50    4.90
   5 -10  -2   45.70    4.30
  -6 -10  -2   57.39    4.50
   6  10  -2   45.50    7.40
   6  10   2   51.09    8.00
   6 -10  -2   41.40    4.60
   7  10  -2   15.70    4.60
   7 -10   2   14.60    4.60
   7  10  -2   22.10    4.80
   7  10  -2   16.20    3.90
   7  10   2    7.20    3.60
   7  10   2    9.20    4.80
   7 -10  -2   14.00    4.30
   7 -10  -2    5.60    2.80
   8  10  -2   34.90    5.80
   8  10  -2   38.80    6.30
   8  10  -2   33.10    5.50
   8  10  -2   39.60    7.20
   8 -10   2   39.40    6.30
   8  10   2   54.39    7.90
   8  10   2   25.20    4.50
   8 -10  -2   36.20    5.80
   9  10  -2   27.30    4.90
   9 -10   2   27.70    5.10
   9  10  -2   46.20    6.50
   9  10  -2   45.40    7.40
   9  10   2   30.40    5.40
   9  10   2   28.70    5.50
   9  10   2   31.90    6.70
   9 -10  -2   23.90    4.60
  10  10  -2    3.50    2.30
  10 -10   2    4.10    3.20
  10  10  -2    6.60    3.00
  10  10  -2    0.00    2.30
  10  10  -2    5.40    4.20
  10  10   2    9.60    2.70
  10 -10  -2    2.60    3.00
  10  10   2   13.20    3.60
  10  10   2   -0.70    1.90
  10  10   2   11.10    4.30
  11  10  -2    1.10    3.20
  11 -10   2    4.00    2.20
  11  10  -2    3.00    1.40
  11  10   2    4.20    1.90
  11  10   2   -0.30    1.30
  11  10   2    4.20    2.40
  11  10   2    1.40    3.00
   0 -11  -2   16.20    3.10
   0 -11   2   14.60    3.00
   0 -11  -2   17.00    2.80
   0 -11   2   23.30    4.20
   0 -11  -2   15.90    2.60
   0 -11   2   18.90    2.60
   1  11  -2   44.40    3.50
   1 -11   2   46.00    4.80
   1 -11   2   41.80    4.80
  -1 -11  -2   42.50    4.80
  -1 -11  -2   48.80    5.10
  -1 -11  -2   48.90    3.50
   1 -11  -2   43.90    3.30
  -1 -11   2   49.50    3.60
   1 -11  -2   47.40    4.40
  -1 -11   2   40.50    5.10
  -1 -11   2   47.50    5.30
   1 -11  -2   46.60    4.50
  -2 -11  -2   34.40    5.20
   2 -11   2   31.10    4.30
   2 -11   2   35.10    4.20
  -2 -11  -2   33.90    5.00
  -2 -11  -2   32.60    3.30
   2 -11  -2   29.70    3.50
  -2 -11   2   36.00    5.40
   2 -11  -2   26.20    3.30
   3 -11   2    5.90    2.00
   3 -11   2    8.10    2.30
  -3 -11  -2    3.20    2.90
  -3 -11  -2    9.20    2.30
  -3 -11   2   12.40    3.70
  -3 -11   2    8.90    5.50
   3 -11  -2    6.20    1.70
  -4 -11  -2   67.39    4.80
  -4 -11  -2   71.19    7.50
  -4 -11   2   72.29   10.20
  -5 -11  -2   18.70    2.90
   5  11  -2   29.10    5.30
   6 -11   2   17.30    7.60
   6  11  -2   29.00    6.20
  -6 -11  -2   22.90    3.60
   6  11  -2   22.40    5.00
   6  11   2   17.80    5.30
   6 -11  -2   23.50    6.60
   7  11  -2    2.40    4.30
   7  11  -2    5.20    4.00
   7  11  -2   -0.80    3.00
   7 -11   2    9.90    4.50
   7  11  -2    2.40    3.40
   7  11   2    1.60    3.80
  -7 -11   2    8.30    2.80
   7  11   2    4.60    3.60
   7 -11  -2    8.40    4.30
   7  11   2    7.60    4.50
   8  11  -2   43.80    7.50
   8 -11   2   55.19    7.30
   8  11  -2   68.69    8.30
   8  11  -2   56.49    7.10
   8  11   2   46.60    7.40
   8  11   2   46.20    7.00
   8 -11  -2   40.40    7.10
   8  11   2   41.50    6.30
   9  11  -2    7.10    4.40
   9  11  -2    8.90    3.50
   9  11  -2   -0.50    2.40
   9 -11   2    9.40    3.90
   9  11  -2    4.80    2.90
   9  11   2   17.60    4.80
   9  11   2    0.10    2.60
   9  11   2   18.20    4.20
   9 -11  -2    5.90    3.50
   9  11   2    8.10    3.00
  10  11  -2    1.30    3.80
  10  11  -2   -0.40    2.30
  10 -11   2    4.90    3.20
  10  11  -2    5.60    3.00
  10  11   2    6.20    2.50
  10  11   2    5.90    3.80
  10 -11  -2    3.20    2.80
  10  11   2    8.80    3.20
  11 -11   2   34.60    3.70
  11  11  -2   37.00    5.30
  11  11   2   40.10    3.10
  11  11   2   29.30    4.20
   0 -12   2   20.20    3.50
   0 -12   2   20.30    3.30
   0 -12  -2   22.50    3.50
   0 -12   2   26.20    2.90
   0 -12  -2   24.40    2.80
   0 -12  -2   21.60    3.40
  -1 -12  -2    4.10    2.60
   1 -12   2    9.10    2.70
   1 -12   2    2.30    2.50
  -1 -12  -2    1.80    2.60
  -1 -12  -2    6.10    2.00
  -1 -12   2    9.40    2.10
   1 -12  -2    7.40    2.50
   1 -12  -2    8.40    1.90
  -1 -12   2    5.60    3.00
  -1 -12   2    2.60    3.00
   1 -12  -2    9.70    2.40
  -2 -12  -2  165.48   10.00
  -2 -12  -2  166.38    8.40
  -2 -12  -2  154.98   10.10
   2 -12   2  175.98    9.30
  -2 -12   2  196.18    8.60
  -2 -12   2  185.78   10.50
   2 -12  -2  167.28    8.40
  -3 -12  -2   21.70    3.40
   3 -12   2   26.50    3.60
  -3 -12  -2   22.10    4.30
  -3 -12   2   21.60    4.40
  -3 -12   2   22.60    3.60
  -4 -12  -2   54.19    4.30
  -4 -12  -2   57.29    7.50
  -4 -12   2   36.30    8.60
  -4 -12   2   46.20    7.20
  -5 -12  -2   92.39    6.10
  -5 -12  -2   99.09   13.30
   5  12  -2  109.19    9.80
   5 -12  -2   97.39    9.60
  -6 -12  -2   97.29    6.20
   6  12  -2   92.49    8.40
   6  12  -2   88.89    9.90
   6 -12   2   94.89    8.50
   6 -12  -2  101.09    8.60
   6  12   2  103.09   10.20
   6  12   2   81.69    8.70
  -6 -12   2   91.99    6.20
   7  12  -2   19.60    4.20
   7  12  -2   25.30    5.10
   7  12  -2   25.90    5.40
   7 -12   2   31.10    5.70
  -7 -12   2   26.70    4.10
   7  12   2   26.30    5.40
   7  12   2   19.20    5.20
   7 -12  -2   31.30    5.40
   7  12   2   25.30    4.60
   8  12  -2   66.09    8.20
   8  12  -2   62.09    7.20
   8 -12   2   57.09    7.40
   8  12  -2   57.79    8.10
   8  12   2   45.40    6.50
   8  12   2   49.10    7.30
   8 -12  -2   55.99    7.30
   8  12   2   58.29    7.70
   9  12  -2    4.00    3.30
   9 -12   2    0.30    3.30
   9  12  -2    0.30    4.50
   9  12  -2    0.10    2.30
   9  12  -2    4.00    2.70
   9  12   2   -0.60    2.20
   9  12   2    5.40    4.30
   9 -12  -2    1.90    3.30
   9  12   2    3.40    2.90
   9  12   2    5.50    3.60
  10  12  -2   29.40    5.70
  10 -12   2   23.30    4.10
  10  12  -2   29.20    4.80
  10  12  -2   22.30    3.80
  10 -12  -2   24.00    4.20
  10  12   2   14.30    3.60
  10  12   2   23.10    3.90
  10  12   2   41.40    5.40
   0 -13   2    6.00    1.90
   0 -13  -2    6.40    2.00
   0 -13   2    5.90    2.90
   0 -13  -2    5.80    2.70
   1 -13   2    7.20    2.90
  -1 -13  -2   16.80    2.40
  -1 -13  -2   10.10    3.20
  -1 -13   2   12.60    2.40
   1 -13  -2   11.60    2.20
   1 -13  -2   12.20    2.70
  -1 -13   2   16.70    3.80
  -2 -13  -2   93.09    5.60
  -2 -13  -2   97.99    7.60
   2 -13   2   94.39    6.50
  -2 -13   2  102.69    5.80
   2 -13  -2   87.39    5.40
  -2 -13   2   99.49    7.90
   3 -13   2   43.80    4.30
  -3 -13  -2   44.90    4.20
  -3 -13  -2   46.60    6.70
  -3 -13   2   49.80    6.90
  -3 -13   2   55.29    4.70
  -4 -13  -2  117.19    9.40
  -4 -13  -2  117.39    6.70
  -4 -13   2  122.69    9.70
   4 -13  -2  103.89   10.60
  -4 -13   2  119.49    7.00
  -5 -13  -2   11.60    2.80
  -5 -13  -2   13.60    4.50
   5 -13   2   17.00    4.90
   5 -13  -2   25.50    5.20
  -5 -13   2   17.30    3.10
  -6 -13  -2   20.90    3.10
   6  13  -2   13.80    5.20
   6  13  -2   17.80    4.40
   6 -13   2   19.20    4.80
  -6 -13   2   16.10    3.10
   6 -13  -2   23.00    5.10
   6  13   2   13.80    4.20
   7  13  -2   65.09    7.60
   7 -13   2   76.29    8.10
   7  13   2   62.59    9.00
   7  13   2   66.19    7.90
   7 -13  -2   87.79    8.00
  -7 -13   2   58.69    5.40
   8 -13   2   29.10    5.20
   8  13  -2   19.20    5.20
   8  13  -2   22.40    4.30
   8  13   2   14.90    5.20
   8  13   2   21.30    4.50
   8 -13  -2   21.10    4.80
   9 -13   2   29.00    4.60
   9  13  -2   36.60    6.10
   9  13  -2   21.40    4.80
   9  13  -2   22.00    4.30
   9  13   2   27.40    4.50
   9  13   2   38.20    6.40
   9 -13  -2   33.10    5.20
   9  13   2   28.60    4.70
  10  13  -2   -0.10    1.40
  10  13  -2    0.50    2.10
  10  13  -2    0.00    2.80
  10  13  -2    1.50    2.20
  10  13  -2    2.40    2.40
  10 -13   2    2.10    2.50
  10  13   2    0.10    2.10
  10 -13  -2    2.50    2.30
  10  13   2    4.40    2.60
  10  13   2    0.20    1.40
  10  13   2   -1.30    2.60
   0 -14  -2  135.49    6.90
   0 -14   2  127.19    8.70
   0 -14   2  128.09    6.80
   0 -14  -2  130.29    8.30
   1 -14   2  296.47   14.80
  -1 -14  -2  293.17   13.40
  -1 -14  -2  306.27   15.20
  -1 -14   2  300.57   13.50
   1 -14  -2  287.27   14.00
  -1 -14   2  292.37   15.20
   1 -14  -2  303.27   13.40
   2 -14   2   84.49    6.10
  -2 -14  -2   75.79    5.20
  -2 -14  -2   79.89    7.60
  -2 -14   2   88.29    8.30
  -2 -14   2   79.39    5.40
  -3 -14  -2    5.80    2.50
  -3 -14  -2    8.00    3.90
  -3 -14   2    5.00    4.10
  -3 -14   2   10.90    2.80
  -4 -14  -2   22.80    3.80
   4 -14   2   34.30    6.00
  -4 -14  -2   24.30    5.10
  -4 -14   2   26.50    4.30
   4 -14  -2   25.00    5.10
  -4 -14   2   28.80    5.70
  -5 -14  -2   20.70    5.40
   5  14  -2   13.90    4.20
   5 -14   2   18.90    5.10
  -5 -14  -2   20.00    3.20
   5 -14  -2   23.50    5.20
  -5 -14   2   21.90    3.40
   6 -14   2   22.00    5.20
  -6 -14  -2   26.30    4.10
   6  14  -2   30.30    4.80
  -6 -14   2   26.20    3.60
   6 -14  -2   24.00    5.10
   6  14   2   29.60    5.00
   7 -14   2   13.50    4.80
  -7 -14  -2   11.20    2.80
   7  14  -2   18.40    5.90
   7  14  -2   10.20    3.80
  -7 -14   2    6.20    2.60
   7  14   2   12.00    4.00
   7  14   2   -1.30    4.60
   7 -14  -2    4.80    4.10
   8  14  -2    0.40    2.40
   8  14  -2    8.80    3.70
   8 -14   2    6.20    3.90
   8 -14  -2   -2.70    3.50
   8  14   2    8.50    4.00
   9  14  -2   34.20    4.70
   9  14  -2   40.20    5.90
   9 -14   2   31.30    5.00
   9 -14  -2   24.70    4.60
   9  14   2   28.00    5.10
   9  14   2   32.70    6.30
   0 -15   2   26.40    4.20
   0 -15  -2   26.20    3.70
   0 -15  -2   24.20    3.70
   0 -15   2   25.70    3.50
  -1 -15  -2   54.29    6.10
   1 -15   2   41.10    5.60
  -1 -15  -2   48.90    4.30
   1 -15  -2   39.00    4.80
  -1 -15   2   49.70    6.80
   1 -15  -2   47.50    3.90
  -1 -15   2   49.99    4.40
  -2 -15  -2    3.20    3.90
   2 -15   2    3.10    2.50
  -2 -15  -2   -1.20    2.40
  -2 -15   2    0.00    2.40
  -2 -15   2    1.60    3.60
   3 -15   2    6.10    7.60
  -3 -15  -2   15.50    4.80
  -3 -15  -2   26.40    4.10
   3 -15   2   24.40    5.30
   3 -15   2   22.80    3.60
  -3 -15   2   23.00    3.40
  -3 -15   2   24.70    5.30
   3 -15  -2   23.10    6.50
   3 -15  -2   29.60    5.60
   3 -15  -2    9.10    6.50
  -4 -15  -2    8.80    2.80
  -4 -15  -2   13.00    4.90
   4 -15   2    8.00    1.50
   4 -15   2   11.10    4.20
  -4 -15   2    3.50    4.70
   4 -15  -2    3.40    4.20
  -4 -15   2    5.90    2.80
   5  15  -2   -0.50    3.60
  -5 -15  -2   -1.70    2.40
  -5 -15  -2   -1.90    4.20
   5 -15   2    2.30    4.00
  -5 -15   2   -2.00    5.70
   5 -15  -2    2.00    4.10
  -5 -15   2    0.30    2.60
   6  15  -2   15.40    4.30
  -6 -15  -2   19.80    3.10
   6 -15   2   12.80    4.70
   6 -15  -2   20.90    5.20
   6  15   2   19.30    4.60
  -6 -15   2   21.30    3.30
   7  15  -2   36.20    7.10
   7 -15   2   28.70    5.20
   7 -15  -2   22.70    4.90
   7  15   2   39.50    7.00
   8  15  -2    0.10    1.50
   8 -15   2    2.50    3.50
   8  15  -2    6.10    3.70
   8  15   2    4.50    3.80
   8 -15  -2    2.70    3.30
   9  15  -2    8.00    2.30
   9  15  -2   11.10    2.70
   9  15  -2   24.60    5.00
   9 -15   2   11.10    3.00
   9  15   2   16.20    3.70
   9  15   2    9.10    2.90
   9 -15  -2   10.90    2.80
   0 -16  -2    2.80    3.90
   0 -16  -2   -2.10    2.30
   0 -16  -2    2.00    3.30
   0 -16   2    0.20    3.50
   0 -16   2    0.40    3.20
   0 -16   2    0.00    3.10
   0 -16  -2    3.00    2.90
   0 -16  -2   -1.50    2.70
   0 -16   2    1.10    3.00
   0 -16  -2   -2.40    7.10
   1 -16   2   21.50    6.20
  -1 -16  -2   37.00    6.40
   1 -16   2   32.00    4.70
   1 -16   2   33.60    6.10
   1 -16   2   30.00    5.20
  -1 -16  -2   26.70    5.00
  -1 -16  -2   35.20    4.00
  -1 -16  -2   31.60    4.60
   1 -16  -2   32.00    4.30
  -1 -16   2   37.10    4.10
   1 -16  -2   41.20    6.90
   1 -16  -2   32.50    5.50
  -1 -16   2   32.60    4.90
   1 -16  -2   30.20    4.20
  -1 -16   2   31.10    5.30
  -2 -16  -2   16.70    3.10
   2 -16   2   14.50    2.80
  -2 -16  -2   12.40    4.50
   2 -16   2    8.10    4.90
  -2 -16  -2   13.90    4.30
   2 -16   2   17.90    3.10
   2 -16   2   12.40    4.20
  -2 -16  -2   16.30    3.90
  -2 -16  -2    7.90    7.00
   2 -16  -2   12.30    5.70
   2 -16  -2   19.10    4.80
   2 -16  -2   14.10    2.30
  -2 -16   2   -3.80    6.50
  -2 -16   2   14.60    2.90
  -2 -16   2   18.60    4.60
   2 -16  -2    3.10    3.90
   3 -16   2    9.00    2.00
   3 -16   2    5.90    4.10
  -3 -16  -2    7.10    2.80
   3 -16   2   -1.60    7.40
   3 -16  -2    6.60    5.40
   3 -16  -2    6.90    5.80
   3 -16  -2    5.80    4.20
  -3 -16   2    9.70    4.60
  -3 -16   2   11.90    2.90
  -4 -16  -2    2.50    2.60
   4 -16   2    6.10    9.80
   4 -16   2    5.00    3.90
  -4 -16  -2    2.40    4.50
   4 -16  -2   10.50    7.60
  -4 -16   2    1.40    2.50
  -4 -16   2    3.60    4.60
   4 -16  -2    5.50    4.10
  -5 -16  -2    3.40    2.60
  -5 -16  -2    4.50    4.60
   5 -16   2    5.30    4.00
   5  16  -2    7.60    4.20
   5 -16  -2    6.10    4.50
  -5 -16   2    7.00    5.10
  -5 -16   2    5.60    2.70
  -6 -16  -2    7.00    2.60
   6 -16   2    8.30    4.20
   6  16  -2    8.90    4.30
   6 -16  -2    5.50    4.20
   6  16   2    5.40    4.20
  -6 -16   2   10.20    2.70
   7  16  -2   10.90    4.20
   7 -16   2    4.70    4.10
   7 -16  -2    7.60    4.00
   7  16   2   11.20    4.30
   8 -16   2    4.70    3.20
   8  16  -2    9.90    3.90
   8  16   2    7.90    3.70
   8 -16  -2    3.80    3.00
   0 -17   2   -0.60    3.50
   0 -17  -2    1.10    3.30
   0 -17  -2    0.10    2.40
   0 -17   2    2.40    3.10
   0 -17  -2    5.60    3.80
   0 -17   2    4.80    3.40
   0 -17  -2    3.00    4.50
   0 -17  -2    2.00    2.80
   0 -17  -2    1.70    2.80
  -1 -17  -2   12.10    3.60
   1 -17   2   15.40    4.40
   1 -17   2   13.70    3.20
  -1 -17  -2   10.00    4.10
   1 -17   2   11.50    5.00
   1 -17   2    8.00    3.00
  -1 -17  -2   11.30    3.40
  -1 -17  -2   -0.10    4.80
  -1 -17  -2   14.70    3.00
  -1 -17   2   -2.00    4.80
   1 -17  -2   16.50    5.20
  -1 -17   2   13.40    2.80
  -1 -17   2    9.50    3.70
   1 -17  -2   10.70    4.40
  -1 -17   2   15.90    4.20
   1 -17  -2    7.60    2.60
  -2 -17  -2    2.00    4.80
  -2 -17  -2   -1.90    3.40
  -2 -17  -2    3.70    6.00
  -2 -17  -2    5.80    2.70
   2 -17   2   -0.20    2.10
   2 -17   2    7.40    4.20
  -2 -17  -2    3.60    3.80
   2 -17   2   -1.50    4.80
   2 -17  -2    1.50    4.20
  -2 -17   2    6.90    2.70
  -2 -17   2   -1.50    5.90
   2 -17  -2    0.90    5.10
  -2 -17   2    3.30    4.10
   2 -17  -2   -4.00    3.70
   2 -17  -2    4.60    1.60
  -2 -17   2    7.20    3.60
   3 -17   2   10.30    4.00
  -3 -17  -2   11.40    4.20
  -3 -17  -2   14.40    2.90
   3 -17   2   10.40    1.80
  -3 -17  -2   11.70    4.70
   3 -17   2   -4.80    6.30
   3 -17  -2    1.30    6.20
   3 -17  -2   17.30    5.50
   3 -17  -2    9.70    4.50
  -3 -17   2    8.50    2.80
  -3 -17   2   21.50    5.40
  -4 -17  -2    0.70    2.30
   4 -17   2   -1.20    3.60
  -4 -17  -2   -8.50    4.00
   4 -17   2   -0.30    7.20
  -4 -17   2   -1.90    4.00
   4 -17  -2    3.60    3.90
  -4 -17   2    0.80    2.50
   4 -17  -2   -4.50    7.20
  -5 -17  -2    1.30    2.30
   5 -17   2    1.80    3.80
   5 -17  -2    3.10    4.10
  -5 -17   2    3.60    2.50
   6  17  -2    0.90    4.00
   6 -17   2    1.10    3.60
   6 -17  -2    5.80    3.80
   7  17  -2   -0.20    4.10
   7 -17   2   -4.60    3.20
   7  17   2    5.10    4.10
   7 -17  -2    0.50    3.30
   8  17  -2    9.20    3.60
   8 -17   2    3.60    2.70
   8  17   2    2.50    3.20
   8 -17  -2    1.80    2.50
   0 -18  -2   33.90    6.20
   0 -18  -2   35.00    4.20
   0 -18  -2   27.60    4.50
   0 -18  -2   25.30    4.90
   0 -18  -2   34.90    4.80
   0 -18   2   34.40    5.00
   0 -18   2   36.80    5.60
  -1 -18  -2   -2.00    2.80
  -1 -18  -2    2.30    3.60
  -1 -18  -2   -3.20    4.30
   1 -18   2   -1.10    3.40
  -1 -18  -2    3.10    3.10
   1 -18   2    3.20    4.40
  -1 -18  -2    2.60    2.50
   1 -18   2    2.10    2.60
   1 -18   2   -2.70    3.30
   1 -18  -2    1.60    4.00
  -1 -18   2    0.30    2.50
   1 -18  -2   -1.60    4.40
   1 -18  -2    0.10    2.10
  -1 -18   2    0.70    3.10
  -1 -18   2   -0.50    4.70
  -1 -18   2    1.10    3.40
   1 -18  -2   -2.50    3.10
  -2 -18  -2    8.80    3.40
  -2 -18  -2    3.90    3.50
   2 -18   2   -1.70    5.00
  -2 -18  -2    4.10    4.80
  -2 -18  -2    7.10    2.70
   2 -18   2    7.70    2.10
   2 -18   2    9.00    4.00
  -2 -18   2   -2.10    5.00
  -2 -18   2    7.30    3.90
   2 -18  -2    2.40    4.60
  -2 -18   2    7.00    2.70
  -2 -18   2    2.90    4.00
   2 -18  -2    3.90    4.00
   2 -18  -2   -0.10    4.50
  -3 -18  -2    2.60    4.10
   3 -18   2    1.70    3.60
  -3 -18  -2   -0.30    3.80
  -3 -18  -2   -1.40    2.30
   3 -18   2   -0.30    6.60
  -3 -18   2    2.80    2.50
  -3 -18   2    5.80    4.40
   3 -18  -2   -7.80    5.70
   3 -18  -2   -0.20    3.70
  -4 -18  -2   10.70    6.00
   4 -18   2    3.00    3.70
  -4 -18  -2    4.50    2.50
   4 -18   2    0.70    7.20
   4 -18  -2   -8.10    6.70
   4 -18  -2    8.10    4.20
  -4 -18   2    9.50    2.90
   5 -18   2   12.10    4.10
   5 -18  -2   12.00    4.30
   6  18  -2    9.90    5.20
   6 -18   2    2.50    3.50
   6 -18  -2    3.40    3.40
   7 -18   2    8.10    3.10
   7  18  -2   10.50    4.00
   7 -18  -2    1.60    3.00
   7  18   2    7.40    3.70
   0 -19  -2   56.79    5.00
   0 -19  -2   51.29    6.30
   0 -19  -2   52.69    8.50
   0 -19   2   53.99    5.30
   1 -19   2   -2.90    3.40
  -1 -19  -2    0.40    3.90
   1 -19   2    0.40    2.30
  -1 -19  -2    0.80    2.90
   1 -19   2   -1.40    3.90
  -1 -19  -2    4.70    2.50
  -1 -19  -2   -3.30    3.20
   1 -19  -2   -4.90    3.30
   1 -19  -2    0.70    1.60
   1 -19  -2    2.50    3.60
   1 -19  -2    2.20    4.40
  -1 -19   2    1.00    3.10
  -1 -19   2   -1.70    4.00
   2 -19   2   -1.50    4.40
  -2 -19  -2    1.60    2.60
  -2 -19  -2   -1.10    3.60
   2 -19   2   -1.30    1.30
  -2 -19  -2    2.30    3.30
   2 -19   2    4.50    3.40
   2 -19  -2   -5.00    4.10
  -2 -19   2    1.30    3.50
  -2 -19   2    0.40    3.70
  -2 -19   2    6.80    3.90
   2 -19  -2    0.30    3.60
  -3 -19  -2   45.50    6.10
   3 -19   2   34.10    5.80
   3 -19  -2   32.20    6.00
  -3 -19   2   40.10    6.40
  -4 -19  -2    7.20    3.90
   4 -19   2    2.30    3.30
   4 -19   2    2.10    6.40
   4 -19  -2    4.40    3.70
   4 -19  -2   -5.00    6.70
   5 -19   2    7.10    3.30
  -5 -19  -2    7.40    4.30
   5 -19  -2    5.30    3.60
   6  19  -2    7.30    4.10
   6 -19  -2    7.80    3.30
   0 -20  -2   -0.70    3.80
   0 -20  -2    6.10    4.40
   0 -20   2    8.50    2.60
   0 -20  -2    8.60    3.40
   0 -20  -2    5.60    2.10
   2 -20   2   35.90    5.40
  -2 -20  -2   36.60    5.00
  -2 -20   2   39.00    5.40
   2 -20  -2   37.90    5.60
  -3 -20  -2   47.10    5.50
   3 -20   2   38.40    5.40
   3 -20  -2   44.50    5.80
  -3 -20   2   44.40    5.40
  -4 -20  -2    8.40    3.20
   4 -20   2    1.60    6.40
   4 -20   2   11.00    3.20
   4 -20  -2   -4.60    6.40
  -4 -20   2   11.90    3.40
   4 -20  -2   10.40    3.40
  -5 -20  -2   30.10    4.60
   5 -20   2   23.70    4.10
   5 -20  -2   32.00    4.60
   6 -20   2    8.00    2.50
  -6 -20  -2    7.40    2.40
   6 -20  -2   10.60    2.80
   0 -21  -2   -1.50    3.50
   0 -21   2    1.10    1.80
   0 -21   2   -2.60    3.30
   0 -21  -2   -1.00    1.60
  -1 -21  -2   -3.80    3.70
   1 -21   2    0.60    3.30
  -1 -21   2    0.60    3.60
  -1 -21   2   11.40    2.60
   1 -21  -2   -1.40    3.40
   1 -21  -2    8.10    2.60
   2 -21   2   36.20    5.00
  -2 -21   2   39.70    4.60
   3 -21   2    2.80    2.40
   3 -21   2   -0.70    4.90
  -3 -21  -2    2.70    2.70
   3 -21  -2    1.70    2.40
   3 -21  -2   -2.50    5.20
  -3 -21   2   -0.80    2.50
  -4 -21  -2   27.10    3.90
   4 -21   2   -1.70    6.00
   4 -21  -2    5.90    5.30
  -4 -21   2   24.80    3.90
  -1 -22  -2   -1.10    2.90
   1 -22   2    2.30    3.40
   1 -22  -2   -0.20    1.80
   1 -22  -2   -2.40    3.10
  -1 -22   2    1.30    1.60
  -1 -22   2   -3.10    3.40
   2 -22   2    1.90    4.00
  -2 -22  -2    3.20    3.60
  -2 -22   2   12.30    2.20
   2 -22  -2    5.50    2.00
  -2 -22   2    0.30    3.40
   2 -22  -2   -0.10    3.70
   3 -22   2   -1.70    5.00
  -3 -22  -2    3.20    1.90
   3 -22  -2    1.30    4.20
  -3 -22   2    0.20    2.00
   3 -22  -2    1.60    1.90
   0   0   3   -1.50    0.70
   0   0  -3   -0.30    0.70
  -1   0  -3   11.60    1.70
   1   0  -3   13.00    1.30
   1   0   3   12.80    2.10
   2   0  -3    1.00    0.90
  -2   0  -3    1.10    1.60
   2   0   3   -0.10    1.50
   2   0   3   -0.30    1.60
   3   0   3   41.70    4.10
   3   0  -3   36.00    2.60
   3   0   3   42.20    3.70
   3   0  -3   36.30    2.80
  -3   0  -3   38.50    3.50
  -3   0   3   45.90    3.90
   4   0   3  202.58    9.70
   4   0   3  203.08    9.10
   4   0  -3  209.28    9.20
   4   0  -3  191.78    9.20
   5   0   3   38.40    4.40
   5   0   3   36.10    3.20
   5   0  -3   33.70    3.50
   5   0  -3   43.20    3.50
   5   0  -3   43.10    3.40
   5   0   3   35.60    4.40
   6   0  -3  114.79    6.60
   6   0   3  113.79    7.90
   6   0   3  120.09    6.50
   6   0  -3  117.59    6.50
   6   0   3  116.89    7.30
   6   0  -3  129.89    6.20
   7   0   3   29.10    4.70
   7   0   3   32.60    3.80
   7   0  -3   28.90    4.10
   8   0  -3  271.07   13.00
   8   0   3  253.57   12.60
   8   0   3  255.27   12.70
  10   0  -3    3.00    5.30
  10   0   3    4.30    1.60
  10   0   3   -3.40    3.70
  11   0   3   -1.10    3.20
  11   0  -3    1.20    3.30
  12   0   3   -1.70    2.20
   0  -1   3  247.48   11.00
   0  -1  -3  261.37   10.90
   0   1  -3  266.27   11.10
   0  -1  -3  274.47   10.90
   1   1  -3  256.77   11.10
  -1  -1  -3  266.97   11.30
   1  -1   3  269.77   11.30
   1   1  -3  253.37   11.20
   1   1   3  270.77   11.30
  -1  -1   3  270.87   11.20
  -1  -1   3  264.27   12.00
   1  -1  -3  256.47   10.80
   1  -1  -3  252.17   10.80
  -1   1  -3  281.37   11.30
  -2  -1  -3   67.29    4.20
   2   1  -3   71.89    4.00
   2  -1   3   72.29    4.30
  -2   1   3   71.19    3.70
   2   1  -3   64.89    3.80
   2  -1  -3   75.89    3.40
  -2   1  -3   66.69    3.90
   2   1   3   73.29    4.70
   2  -1  -3   71.49    3.20
   2   1   3   73.59    4.40
   3   1  -3  416.36   18.40
   3  -1   3  431.96   18.30
   3  -1   3  411.46   19.00
   3  -1   3  460.05   18.80
   3   1  -3  423.36   18.40
   3   1  -3  475.85   18.70
  -3  -1  -3  426.76   18.80
   3   1   3  444.56   18.90
   3  -1  -3  472.25   18.20
   3   1   3  410.66   19.10
   3  -1  -3  432.76   18.40
  -3  -1   3  454.45   19.40
   4   1  -3   80.39    4.90
   4   1  -3   74.39    4.60
   4  -1   3   78.79    4.40
   4  -1   3   81.29    5.10
   4   1   3   80.99    4.30
   4  -1  -3   82.39    4.60
   4   1   3   77.79    5.50
   4  -1  -3   83.59    4.40
   4   1   3   64.79    6.80
   5   1  -3   24.80    2.90
   5   1  -3   24.40    3.60
   5  -1   3   27.00    3.30
   5   1  -3   25.40    3.40
   5  -1   3   24.40    3.70
   5  -1   3   27.00    2.90
   5   1   3   28.20    3.70
   5  -1  -3   21.30    2.90
   5  -1  -3   26.90    3.00
   5   1   3   21.20    2.60
   5   1   3   22.60    3.20
   6   1  -3  102.49    6.30
   6  -1   3  101.99    6.10
   6   1  -3  121.19    6.50
   6   1  -3  117.19    6.60
   6  -1   3  120.29    7.30
   6  -1   3  116.69    6.90
   6  -1  -3  122.99    6.70
   6  -1  -3  113.49    6.00
   6   1   3  107.79    6.20
   6   1   3  116.79    7.30
   6   1   3  114.59    7.70
   7   1  -3  107.09    6.70
   7  -1   3  108.79    6.60
   7   1  -3  112.39    6.20
   7  -1   3  107.99    7.00
   7  -1  -3  108.19    6.80
   7   1   3  117.09    7.50
   7   1   3  111.79    6.50
   8   1  -3   27.30    4.30
   8  -1   3   34.50    4.40
   8  -1   3   28.30    4.10
   8  -1  -3   32.40    4.50
   8   1   3   33.10    4.10
   8   1   3   43.30    5.30
   9  -1   3   51.59    5.90
   9   1  -3   61.59    3.60
   9   1  -3   71.49    7.80
   9   1  -3   51.59    5.30
   9  -1   3   46.70    4.20
   9  -1   3   48.60    5.00
   9  -1  -3   56.39    5.40
   9  -1  -3   38.30   11.10
   9   1   3   59.39    4.80
   9   1   3   51.69    5.20
  10  -1   3    1.50    4.30
  10   1  -3   -1.80    4.90
  10   1   3   -2.70    3.00
  10  -1  -3    9.40    5.80
  11   1  -3    2.10    3.20
  11  -1   3   -2.40    3.10
  11   1   3   -1.80    2.80
  12  -1   3    0.40    2.50
  12   1  -3    2.80    2.60
  12   1   3    0.20    2.40
   0  -2   3    2.40    1.30
   0   2  -3    3.70    1.30
   0  -2  -3    1.60    1.00
   0  -2  -3    4.10    1.00
   1   2  -3  379.26   15.80
   1  -2   3  391.16   15.70
  -1  -2  -3  379.86   15.60
   1  -2  -3  349.37   15.10
  -1   2  -3  381.16   15.60
   1  -2  -3  356.16   15.10
  -1  -2   3  375.76   15.70
   1   2   3  395.56   15.80
  -1  -2   3  346.17   16.20
   2  -2   3  205.48    9.50
   2  -2   3  215.38    9.50
  -2  -2  -3  222.48    9.70
   2   2  -3  209.68    9.70
   2   2   3  222.08    9.90
  -2   2  -3  206.58    9.50
  -2  -2   3  207.48    9.60
  -2  -2   3  218.78   10.30
   3   2  -3   26.30    3.40
   3  -2   3   30.20    2.60
   3  -2   3   25.50    3.20
  -3  -2  -3   25.70    3.30
   3  -2   3   24.40    4.20
   3   2  -3   23.60    2.70
  -3  -2   3   31.80    4.40
   3  -2  -3   26.30    1.90
   3  -2  -3   26.70    2.50
   3   2   3   29.40    3.40
   3  -2  -3   26.40    1.80
   4   2  -3  133.69    6.40
   4  -2   3  129.89    6.90
   4   2  -3  140.39    7.10
   4  -2   3  132.19    6.40
   4  -2  -3  135.69    6.00
   4   2   3  131.69    7.70
   4  -2  -3  137.49    6.50
  -4  -2   3  136.19    8.40
   4   2   3  117.89    7.40
   4  -2  -3  121.79    5.90
   4   2   3  121.79    6.20
   5   2  -3  278.77   12.70
   5  -2   3  271.97   12.50
   5   2  -3  267.27   12.20
   5   2  -3  262.97   12.50
   5  -2   3  263.37   12.50
   5  -2   3  262.77   12.10
   5  -2  -3  268.67   11.60
   5   2   3  265.17   13.50
   5   2   3  256.17   13.00
   5   2   3  260.57   11.90
   5  -2  -3  291.47   12.40
   6  -2   3  105.59    6.10
   6  -2   3   96.69    6.20
   6   2  -3   88.39    6.10
   6   2  -3   84.59    5.70
   6   2  -3  100.09    6.10
   6  -2   3   92.79    5.60
   6   2   3   87.89    5.30
   6  -2  -3   82.99    4.80
   6  -2  -3   97.99    5.70
   6   2   3   90.89    6.60
   7   2  -3  102.09    6.50
   7  -2   3  109.29    6.60
   7   2  -3  101.09    6.60
   7  -2   3  114.59    6.50
   7  -2  -3  101.39    6.40
   7   2   3  111.99    7.40
   7   2   3   98.19    6.20
   8   2  -3   58.59    5.00
   8  -2   3   54.99    5.00
   8   2  -3   54.69    5.20
   8  -2  -3   61.69    5.40
   8   2   3   53.09    6.00
   9   2  -3   10.10    2.10
   9  -2   3   12.50    2.20
   9   2  -3    6.90    5.10
   9   2  -3    9.80    4.30
   9  -2   3   15.90    3.30
   9  -2   3   26.90    5.90
   9   2  -3   15.20    3.30
   9  -2   3   14.10    3.90
   9   2   3    9.70    3.70
   9  -2  -3    8.50    3.20
   9   2   3   13.10    3.20
   9   2   3   15.20    2.90
  10  -2   3   46.80    6.10
  10   2  -3   70.49    8.40
  10   2   3   64.29    8.20
  10   2   3   59.09    4.60
  11   2  -3    8.10    5.40
  11  -2   3   -3.90    2.90
  11   2  -3   -2.40    3.00
  11   2   3   -1.60    3.20
  12  -2   3    0.40    2.50
  12   2  -3    0.90    2.60
  12   2   3   -0.20    2.10
   0   3  -3 1727.13   72.99
   0  -3  -3 1727.63   72.79
   0  -3   3 1795.22   72.99
   0  -3  -3 1871.11   72.69
   0  -3   3 1854.41   73.49
   1  -3   3  920.21   36.00
  -1  -3  -3  921.81   36.00
   1   3  -3  865.11   36.20
  -1  -3   3  846.12   36.70
  -1   3  -3  926.31   36.10
   1  -3  -3  825.22   35.50
   1   3   3  880.41   36.10
   1  -3  -3  818.92   35.50
  -1  -3   3  889.41   36.20
   2  -3   3  329.37   14.00
   2  -3   3  309.37   14.00
  -2  -3  -3  336.47   14.20
   2   3  -3  323.57   14.30
  -2  -3   3  324.17   15.00
  -2  -3   3  307.67   14.20
   2   3   3  342.97   14.50
  -3  -3  -3  102.19    6.30
   3   3  -3  118.29    6.50
   3  -3   3  118.09    5.70
   3  -3   3  123.09    6.20
   3   3  -3  119.39    5.80
   3  -3  -3  109.79    5.70
   3   3   3  111.69    6.60
  -3  -3   3  123.09    8.00
   4   3  -3   85.29    4.90
   4   3  -3   89.29    5.90
   4  -3   3   94.09    5.00
   4  -3   3   92.29    5.40
   4   3   3   95.29    6.90
   4  -3  -3  101.79    5.30
   4  -3  -3   93.59    4.10
   4   3   3   82.49    4.60
  -4  -3   3   94.99    7.50
   5  -3   3   97.99    6.10
   5  -3   3  116.99    6.10
   5  -3   3  102.99    5.70
   5   3  -3  109.29    6.70
   5   3  -3  106.69    5.90
   5   3  -3  102.89    6.40
   5   3   3  105.39    7.10
   5   3   3   97.69    5.50
   5  -3  -3  103.79    4.80
   5  -3  -3  106.79    6.10
   6   3  -3   12.70    2.80
   6  -3   3   14.50    2.50
   6   3  -3   18.60    2.90
   6  -3   3   18.00    3.10
   6   3  -3   18.30    2.90
   6  -3   3   11.90    2.60
   6  -3  -3   12.80    2.50
   6   3   3   15.30    2.60
   6   3   3    8.10    2.90
   6   3   3   12.80    3.10
   7  -3   3   38.60    3.90
   7  -3   3   50.49    4.30
   7   3  -3   45.20    4.10
   7   3  -3   41.50    4.80
   7   3   3   51.69    5.80
   7  -3  -3   41.00    4.20
   8   3  -3   10.40    3.00
   8  -3   3    7.80    2.80
   8   3  -3   11.30    2.70
   8  -3  -3    9.00    2.80
   8   3   3    7.60    3.30
   9   3  -3   12.50    4.20
   9   3  -3   -1.20    4.80
   9   3  -3   11.60    3.10
   9  -3   3    6.50    2.80
   9  -3   3   15.20    4.20
   9   3  -3    5.90    2.20
   9  -3   3    6.30    1.50
   9   3   3    3.20    3.10
   9   3   3    9.00    3.30
   9  -3  -3    4.40    3.10
   9   3   3    8.20    3.50
   9   3   3   12.10    2.90
  10   3  -3   18.30    5.10
  10  -3   3    2.80    4.20
  10   3  -3    1.00    4.30
  10   3  -3   13.80    2.20
  10  -3   3   18.50    4.00
  10   3   3   15.20    2.70
  10   3   3   14.20    5.10
  11   3  -3    2.40    4.60
  11  -3   3    0.00    3.20
  11   3  -3    0.40    3.10
  11   3   3   -0.40    3.20
  11   3   3    9.60    4.70
  11   3   3    1.40    1.40
  12  -3   3   -0.10    2.50
  12   3  -3    0.20    2.30
  12   3   3   -1.00    2.20
   0  -4   3  104.99    6.40
   0   4  -3  109.19    5.80
   0  -4   3  110.69    5.80
   0  -4  -3  102.19    5.40
   0  -4  -3  111.69    5.30
  -1  -4  -3  280.47   11.70
  -1  -4  -3  247.08   12.50
   1   4  -3  257.37   11.80
   1  -4   3  282.17   11.70
   1  -4   3  280.77   12.40
  -1  -4   3  256.17   11.80
  -1   4  -3  273.37   11.70
   1  -4  -3  258.77   11.10
  -1  -4   3  243.78   12.60
   1  -4  -3  249.08   11.10
   2  -4   3    5.70    1.40
   2  -4   3    5.40    1.80
   2  -4   3    6.10    1.80
   2   4  -3    2.10    2.00
   2   4  -3    7.70    1.60
  -2  -4  -3    8.10    2.30
  -2  -4   3    3.60    1.90
   2   4   3    5.60    2.20
   2  -4  -3    3.50    0.60
   2  -4  -3    3.80    0.70
  -2  -4   3    3.00    2.10
   3   4  -3   65.39    5.00
   3   4  -3   70.49    4.10
  -3  -4  -3   69.49    5.10
   3  -4   3   72.59    4.50
   3  -4   3   67.99    3.90
   3  -4  -3   63.59    4.10
  -3  -4   3   87.49    8.60
   3   4   3   72.49    5.90
   4   4  -3   39.30    4.80
   4   4  -3   45.90    4.50
   4  -4   3   52.59    3.90
   4  -4   3   51.29    3.40
   4   4  -3   49.10    3.60
   4   4   3   44.00    3.00
   4  -4  -3   48.20    3.50
  -4  -4   3   41.80    6.90
   5  -4   3   50.09    3.90
   5   4  -3   43.60    3.70
   5   4  -3   37.00    4.40
   5  -4   3   44.30    3.50
   5  -4   3   41.10    3.80
   5   4  -3   45.30    4.60
   5   4   3   44.30    4.80
   5   4   3   47.20    5.40
   5  -4  -3   43.20    3.90
   6  -4   3   11.30    2.30
   6   4  -3    9.40    2.80
   6  -4   3   10.00    2.20
   6   4  -3   16.70    2.70
   6  -4   3    8.10    2.10
   6   4  -3    6.50    2.60
   6   4   3   13.90    3.10
   6  -4  -3   10.40    2.50
   6   4   3   10.10    2.90
   7   4  -3   21.30    3.40
   7  -4   3   34.00    3.90
   7   4  -3   22.80    3.40
   7  -4  -3   23.80    4.00
   7   4   3   32.40    5.50
   8   4  -3   36.10    4.40
   8  -4   3   38.00    4.70
   8   4  -3   31.10    5.10
   8  -4  -3   41.90    5.00
   8   4   3   63.39    6.40
   9   4  -3   15.90    2.80
   9  -4   3   34.50    6.30
   9   4  -3   16.30    4.80
   9  -4   3   18.30    4.50
   9   4   3   18.90    3.40
   9   4   3   15.00    3.90
   9   4   3   14.60    3.80
  10   4  -3    0.20    3.90
  10  -4   3    7.20    4.30
  10   4  -3   -0.20    1.70
  10  -4   3    4.10    3.30
  10   4  -3   -2.50    3.90
  10   4   3    8.90    4.80
  10   4   3    1.50    2.90
  10   4   3    4.80    2.40
  10   4   3    0.80    3.30
  11  -4   3    1.30    2.90
  11   4  -3   21.10    5.30
  11   4   3   14.80    1.90
  11   4   3    0.90    2.90
  11   4   3   19.20    5.00
  12   4  -3   10.20    4.20
  12   4   3    7.90    4.10
   0   5  -3   26.20    3.30
   0  -5   3   33.60    3.70
   0  -5  -3   35.00    3.20
   0  -5  -3   25.50    3.10
   0  -5   3   32.50    4.40
  -1  -5  -3   63.29    4.20
   1   5  -3   60.09    4.60
   1  -5   3   58.99    4.20
  -1  -5  -3   54.99    5.80
   1   5  -3   50.09    3.20
   1  -5   3   64.29    5.10
   1  -5  -3   54.09    3.40
   1   5   3   54.99    4.30
  -1   5  -3   51.89    4.00
  -1  -5   3   54.79    5.90
  -1   5  -3   55.19    4.10
  -1  -5   3   60.09    4.60
   1  -5  -3   50.09    3.40
   2   5  -3   22.30    3.50
   2  -5   3   20.70    3.10
  -2  -5  -3   28.10    3.80
   2  -5   3   21.90    2.30
   2   5  -3   18.90    2.40
   2  -5  -3   22.20    1.90
   2  -5  -3   21.90    2.30
   2   5   3   19.70    2.90
  -2  -5   3   23.80    3.40
   2  -5  -3   21.50    1.80
   3   5  -3   21.60    3.30
  -3  -5  -3   21.20    3.60
   3  -5   3   25.60    3.20
   3  -5   3   20.30    2.40
   3   5  -3   23.30    2.60
  -3  -5   3   19.70    5.10
   3  -5  -3   19.70    2.60
   3   5   3   22.20    3.60
   4   5  -3  176.68   10.00
   4  -5   3  199.58    9.20
   4  -5   3  184.98    9.10
   4   5  -3  183.88    8.90
   4   5  -3  209.98   10.30
   4  -5   3  192.58    9.00
  -4  -5   3  204.88   12.30
   4  -5  -3  205.68    9.10
   4   5   3  183.88   10.10
   4   5   3  179.48   10.80
   5   5  -3  143.59    8.40
   5  -5   3  144.89    7.30
   5  -5   3  144.99    7.30
   5   5  -3  136.29    8.30
   5   5  -3  137.29    7.10
   5  -5   3  141.69    7.20
   5   5   3  131.39    8.50
   5  -5  -3  147.99    7.30
   5   5   3  122.69    8.60
   6   5  -3   12.80    3.00
   6   5  -3   18.10    3.50
   6  -5   3   18.40    3.20
   6   5  -3   20.60    3.40
   6  -5   3   20.70    2.80
   6  -5   3   18.90    3.00
   6   5   3   23.10    4.00
   6   5   3   14.20    3.30
   6  -5  -3   21.90    3.30
   7   5  -3    7.00    2.90
   7   5  -3   12.30    2.70
   7  -5   3    6.60    2.40
   7   5   3    6.20    3.40
   7  -5  -3   11.40    2.90
   8   5  -3   33.30    5.30
   8   5  -3   27.00    4.00
   8  -5   3   28.10    3.90
   8   5  -3   16.90    3.20
   8  -5  -3   27.20    4.00
   8   5   3   27.20    4.40
   9  -5   3    9.80    4.50
   9   5  -3   23.60    3.60
   9  -5   3   24.20    4.80
   9   5  -3   24.10    4.90
   9   5  -3   19.30    3.90
   9   5  -3   25.10    3.50
   9   5   3   26.70    4.80
   9   5   3   23.80    4.10
   9   5   3   37.90    6.10
  10  -5   3   20.40    4.10
  10   5  -3   18.70    3.30
  10   5  -3   17.00    4.70
  10  -5   3    6.90    4.00
  10   5   3   18.50    3.90
  10   5   3   27.30    5.50
  10   5   3   18.60    3.10
  10   5   3   17.80    3.70
  11  -5   3    4.40    2.80
  11   5  -3    0.30    2.70
  11   5  -3   -0.90    4.30
  11   5   3   -2.90    2.40
  11   5   3    8.30    4.40
  11   5   3    2.40    1.80
  12   5  -3    8.70    3.80
  12   5  -3   -0.30    2.10
  12   5   3    0.70    3.80
  12   5   3    0.80    2.00
   0  -6   3  417.26   18.80
   0   6  -3  391.96   17.70
   0  -6  -3  345.67   19.30
   0  -6   3  427.26   17.70
   0  -6  -3  421.66   17.30
  -1  -6  -3  257.47   13.90
   1  -6   3  286.87   12.60
   1   6  -3  263.67   11.90
   1  -6   3  277.07   13.60
   1   6  -3  285.37   13.00
  -1  -6  -3  301.27   12.70
  -1  -6   3  298.27   12.90
   1  -6  -3  255.07   12.10
  -1  -6   3  267.87   13.90
   2   6  -3   40.90    4.60
  -2  -6  -3   46.90    4.50
   2   6  -3   44.90    3.10
  -2  -6  -3   43.10    5.90
   2  -6   3   48.50    3.90
   2  -6  -3   43.20    2.80
   2  -6  -3   41.00    3.00
   2  -6  -3   40.10    2.90
  -2  -6   3   41.90    4.40
   3   6  -3   17.40    3.00
   3  -6   3   12.70    2.20
  -3  -6  -3    9.40    2.60
   3  -6   3   16.10    2.20
   3   6  -3   13.60    2.10
   3  -6  -3   12.80    2.20
  -3  -6   3    3.60    6.00
   4   6  -3  133.29    8.10
   4  -6   3  152.18    7.00
   4  -6   3  144.99    7.10
   4   6  -3  132.19    6.90
   4  -6   3  127.89    6.90
   4   6  -3  121.69    8.20
   4   6   3  124.19    8.50
   4  -6  -3  134.99    6.90
  -4  -6   3  133.09   11.50
   5  -6   3    5.70    1.80
   5   6  -3    7.70    3.00
   5   6  -3    5.30    1.90
   5   6  -3    7.20    2.90
   5  -6   3    6.10    1.90
   5  -6   3    7.10    2.30
   5   6   3    9.30    3.20
  -5  -6   3    3.70    3.40
   5  -6  -3    2.90    1.90
   6   6  -3   35.70    5.20
   6  -6   3   20.80    3.70
   6   6  -3   28.00    3.60
   6  -6   3   26.40    3.70
   6   6   3   22.40    3.90
   6  -6  -3   23.10    3.30
   7  -6   3   44.60    4.50
   7   6  -3   31.30    4.10
   7   6  -3   37.20    4.60
   7  -6  -3   26.80    4.30
   7   6   3   30.20    5.10
   8  -6   3   32.40    5.40
   8  -6   3   34.70    4.60
   8   6  -3   29.60    4.30
   8   6  -3   27.30    5.20
   8  -6  -3   37.70    4.80
   8   6   3   25.70    4.80
   8   6   3   31.50    7.70
   9   6  -3   35.20    5.20
   9   6  -3   44.80    7.50
   9  -6   3   41.10    6.10
   9   6  -3   35.10    5.70
   9   6  -3   39.20    4.70
   9   6   3   44.70    6.40
   9   6   3   52.19    5.20
   9   6   3   41.10    6.50
  10  -6   3   33.00    5.70
  10   6  -3   27.90    3.80
  10   6  -3   30.40    5.30
  10   6   3   28.70    5.80
  10   6   3   32.00    5.90
  10   6   3   27.50    4.60
  11  -6   3   24.00    4.40
  11   6  -3   31.10    5.40
  11   6   3   28.60    3.40
  11   6   3   24.80    5.30
  12   6  -3   -1.60    1.70
  12   6  -3    0.70    3.40
  12   6   3    0.10    1.40
  12   6   3    0.80    3.50
   0  -7   3  242.58   11.40
   0  -7   3  228.88   12.60
   0  -7  -3  237.28   10.90
   1  -7   3   49.50    4.40
  -1  -7  -3   43.90    6.20
  -1  -7  -3   45.40    4.30
   1   7  -3   43.70    3.10
  -1  -7   3   50.89    4.70
  -1  -7   3   39.20    5.60
   1  -7  -3   52.39    3.40
  -2  -7  -3   25.90    4.00
   2  -7   3   28.70    3.50
   2   7  -3   27.90    4.40
   2   7  -3   27.00    2.60
  -2  -7  -3   22.40    4.10
  -2  -7   3   24.80    4.20
   2  -7  -3   26.00    2.50
   2  -7  -3   19.80    2.60
   3  -7   3   41.70    3.30
   3   7  -3   38.00    3.10
   3  -7   3   41.00    3.80
   3  -7   3   46.60    3.90
   3   7  -3   45.20    5.10
   3  -7  -3   40.30    2.40
   3  -7  -3   40.60    2.30
   3  -7  -3   38.50    3.20
  -3  -7   3   37.10    7.20
   4   7  -3   28.10    4.10
   4   7  -3   29.70    3.10
   4  -7   3   28.60    3.00
   4   7  -3   33.70    4.90
   4  -7   3   31.80    3.30
   4  -7   3   25.90    3.30
   4  -7  -3   24.70    3.10
   4   7   3   23.40    3.60
  -4  -7   3   18.70    5.60
   5  -7   3   25.80    3.10
   5   7  -3   30.20    4.30
   5  -7   3   25.80    3.30
   5  -7   3   26.20    3.20
   5   7  -3   24.10    3.20
   5   7  -3   23.10    4.00
   5  -7  -3   24.30    3.10
   5   7   3   20.00    3.60
  -5  -7   3   23.10    5.90
   6   7  -3   16.20    5.30
   6   7  -3   19.60    3.00
   6  -7   3   21.20    3.10
   6   7  -3   17.30    3.60
   6   7   3   15.20    3.80
   6  -7  -3   21.40    3.60
   7  -7   3   64.69    5.30
   7   7  -3   53.39    6.50
   7  -7  -3   48.30    4.70
   7   7   3   64.59    7.60
   8  -7   3   36.80    4.80
   8  -7   3   37.40    6.30
   8   7  -3   34.90    5.10
   8   7  -3   47.20    6.40
   8   7  -3   39.60    7.60
   8   7  -3   37.90    6.10
   8  -7  -3   45.00    5.00
   8   7   3   38.80    6.40
   8   7   3   47.80    7.20
   8   7   3   39.70    6.20
   9   7  -3   18.20    3.30
   9  -7   3   19.40    4.50
   9   7  -3   24.30    5.00
   9   7  -3   18.90    3.70
   9   7  -3   21.00    3.70
   9   7   3   21.10    3.60
   9   7   3   18.00    4.10
   9   7   3   18.40    4.40
  10  -7   3    4.20    3.50
  10   7  -3    2.10    3.10
  10   7  -3    0.20    3.00
  10   7  -3    5.10    2.30
  10   7  -3    8.20    4.30
  10   7   3   13.30    4.70
  10   7   3    2.70    2.60
  10   7   3   -0.80    2.40
  10   7   3    4.80    3.20
  11   7  -3    4.90    4.30
  11  -7   3    9.20    3.00
  11   7   3    7.90    2.10
  11   7   3    9.60    4.40
  11   7   3    7.60    2.90
   0  -8   3  226.28   13.10
   0  -8   3  246.08   11.60
   0  -8  -3  242.38   11.20
   1  -8   3  364.66   16.00
  -1  -8  -3  350.56   16.00
   1   8  -3  315.37   15.10
   1  -8   3  384.46   16.80
  -1  -8   3  329.97   17.30
   1  -8  -3  364.96   15.50
  -1  -8   3  372.06   16.30
  -2  -8  -3   -2.50    2.90
  -2  -8  -3    0.00    2.30
   2  -8   3    1.70    2.00
   2   8  -3    2.00    1.50
  -2  -8   3    1.10    3.00
   2  -8  -3    2.20    1.50
  -3  -8  -3   29.60    4.60
   3   8  -3   24.00    2.80
   3  -8   3   30.10    3.60
   3  -8   3   19.00    2.60
   3   8  -3   26.40    3.80
  -3  -8  -3   20.90    2.70
  -3  -8   3   15.40    7.10
   3  -8  -3   21.20    2.80
   3  -8  -3   20.20    2.00
   4  -8   3   21.20    3.10
  -4  -8  -3   18.50    2.80
   4   8  -3   21.40    2.90
   4  -8   3   18.90    3.10
  -4  -8  -3   14.50    3.00
   4   8  -3   17.30    3.60
   4  -8   3   18.00    2.80
  -4  -8   3   23.00    6.60
   4   8   3   12.70    3.40
   4  -8  -3   20.40    3.00
  -5  -8  -3   24.10    3.20
   5   8  -3   28.10    3.50
   5  -8   3   37.20    3.80
   5   8  -3   33.50    5.50
   5  -8   3   35.00    3.60
  -5  -8   3   42.10    7.70
   5   8   3   36.20    6.30
   5  -8  -3   37.50    3.50
   6  -8   3   11.00    2.60
   6   8  -3   11.90    3.60
   6   8   3    0.80    3.30
   6  -8  -3    3.60    2.30
   7  -8   3    2.40    2.60
   7   8  -3    2.10    3.30
   7  -8  -3   -1.90    2.50
   7  -8  -3   -5.70    4.90
   7   8   3    7.00    4.10
   8   8  -3   40.10    6.80
   8   8  -3   35.00    6.10
   8  -8   3   36.90    6.50
   8   8  -3   38.90    5.50
   8  -8   3   43.00    4.90
   8   8  -3   40.20    7.50
   8   8   3   38.40    6.40
   8   8   3   42.00    5.90
   8  -8  -3   36.00    6.40
   9   8  -3   81.59    8.40
   9   8  -3   73.79    6.60
   9   8  -3   73.09    5.90
   9   8  -3   74.79    6.90
   9  -8   3   66.89    7.30
   9   8   3   65.49    7.40
   9   8   3   64.69    7.40
   9   8   3   64.29    6.10
  10   8  -3   13.90    2.70
  10   8  -3   11.40    3.30
  10  -8   3   14.10    4.00
  10   8  -3   15.30    4.60
  10   8   3   12.00    3.60
  10   8   3   14.30    4.80
  10   8   3   15.60    3.00
  11   8  -3   -0.40    2.00
  11  -8   3    3.20    2.70
  11   8  -3    1.20    3.50
  11   8   3    2.30    1.90
  11   8   3   -1.70    2.50
  11   8   3    5.10    3.90
  11   8   3    0.60    1.50
   0  -9   3  270.47   13.10
   0  -9  -3  267.77   12.30
   0  -9   3  268.27   12.90
   0  -9  -3  271.37   12.00
   0  -9  -3  271.97   12.60
   1   9  -3   24.60    2.80
  -1  -9  -3   28.90    2.80
   1  -9   3   28.20    3.30
  -1  -9  -3   26.30    4.10
  -1  -9  -3   27.60    4.20
   1  -9   3   29.60    4.20
   1  -9  -3   22.30    3.40
   1  -9  -3   27.70    3.40
  -1  -9   3   27.70    4.40
  -1  -9   3   23.10    3.30
   2   9  -3  144.79    7.50
  -2  -9  -3  156.98    8.80
   2  -9   3  147.39    8.20
   2  -9   3  146.19    8.30
  -2  -9  -3  143.79    7.20
  -2  -9   3  166.38    9.00
  -2  -9   3  179.48    6.60
   2  -9  -3  156.48    7.60
   2  -9  -3  139.29    7.20
   3  -9   3   48.50    4.30
   3   9  -3   48.40    6.00
  -3  -9  -3   49.90    3.80
   3   9  -3   56.99    3.90
  -3  -9  -3   56.09    5.60
   3  -9   3   50.49    4.40
  -3  -9   3   70.29    9.70
   3  -9  -3   49.70    3.70
   3  -9  -3   52.59    3.10
  -3  -9   3   48.70    5.80
   4  -9   3   80.49    5.00
   4   9  -3   81.29    5.20
  -4  -9  -3   71.39    4.70
   4  -9   3   78.29    5.10
   4   9  -3   92.89    7.40
  -4  -9  -3   73.79    6.80
  -4  -9   3   98.79   12.30
   4  -9  -3   77.29    5.00
  -5  -9  -3   40.60    3.80
   5   9  -3   58.59    6.60
   5  -9   3   48.50    4.40
  -5  -9   3   56.89   10.40
   5   9   3   43.70    5.90
   5  -9  -3   51.99    4.40
  -6  -9  -3   13.70    3.20
   6  -9   3   13.10    2.80
   6   9  -3   15.50    3.90
   6   9   3    7.20    4.00
   6  -9  -3   18.40    3.10
   7   9  -3   24.90    5.10
   7  -9   3   26.60    5.10
   7   9  -3   27.00    5.00
   7  -9   3   28.40    3.90
   7  -9  -3   19.40    3.40
   7   9   3   24.70    5.50
   7  -9  -3   17.40    7.60
   7  -9  -3   15.40    6.50
   8   9  -3   45.00    7.10
   8   9  -3   35.80    5.50
   8   9  -3   42.70    6.20
   8  -9   3   22.80    5.10
   8   9  -3   33.70    5.60
   8  -9  -3   20.80    5.00
   8   9   3   26.60    4.60
   8   9   3   25.00    5.50
   9   9  -3    5.50    3.10
   9   9  -3    3.70    3.20
   9  -9   3    7.20    3.90
   9   9  -3    4.90    4.20
   9   9  -3   -0.60    2.50
   9   9  -3    9.80    3.00
   9   9  -3    4.70    3.20
   9   9   3    4.10    3.50
   9   9   3    2.10    4.60
   9  -9  -3    7.20    3.70
   9   9   3    4.50    3.00
   9   9   3    1.10    2.70
   9   9   3    5.90    4.00
  10  -9   3   11.20    3.70
  10   9  -3   24.60    5.00
  10   9  -3   12.80    2.70
  10   9  -3   15.30    3.20
  10   9   3   21.10    4.90
  10   9   3   13.60    3.00
  10   9   3   14.80    3.80
  11   9  -3    1.10    3.20
  11   9  -3    0.90    1.90
  11  -9   3    2.40    2.50
  11   9   3    0.00    1.80
  11   9   3    0.00    1.60
  11   9   3    2.70    3.50
  11   9   3    0.20    2.40
   0 -10   3    5.00    2.60
   0 -10  -3    1.80    2.10
   0 -10   3    5.20    2.40
   0 -10   3    5.50    1.70
   0 -10  -3    6.60    2.00
   0 -10  -3    4.80    1.70
  -1 -10  -3   60.49    5.50
   1 -10   3   62.29    5.30
   1  10  -3   61.69    4.10
  -1 -10  -3   61.19    5.20
  -1 -10  -3   67.09    4.10
   1 -10   3   61.69    5.10
   1 -10  -3   63.99    3.90
  -1 -10   3   64.49    5.90
   1 -10  -3   69.29    4.80
  -1 -10   3   67.89    5.80
   1 -10  -3   70.99    4.60
  -2 -10  -3   54.09    3.70
  -2 -10  -3   46.10    5.10
  -2 -10  -3   49.99    5.30
   2  10  -3   47.90    3.70
   2 -10   3   52.79    4.80
   2 -10   3   51.89    4.60
   2 -10  -3   44.50    3.20
   2 -10  -3   44.40    3.80
  -2 -10   3   50.69    5.60
   2 -10  -3   45.00    3.50
  -2 -10   3   43.10    7.90
  -3 -10  -3  125.69    6.50
   3 -10   3  114.49    6.90
  -3 -10  -3  129.69    8.40
   3  10  -3  121.89    6.60
   3 -10   3  126.29    7.30
   3 -10  -3  125.09    6.00
  -3 -10   3  122.29   12.30
  -3 -10   3  141.59    8.50
   4 -10   3   76.29    5.20
   4 -10   3   73.99    4.90
  -4 -10  -3   76.89    7.10
   4  10  -3   85.39    7.50
  -4 -10  -3   76.89    4.80
  -4 -10   3   71.99   12.20
   4 -10  -3   77.39    5.00
   5  10  -3  134.29    9.50
  -5 -10  -3  125.89    6.90
   5 -10  -3  128.79    7.20
   5  10   3  123.09    9.90
  -6 -10  -3   62.29    4.60
   6  10  -3   63.59    8.00
   6 -10  -3   55.69   12.70
   6  10   3   57.79    8.20
   6 -10  -3   61.99    5.10
   7 -10   3   55.99    7.00
   7  10  -3   46.00    7.30
   7  10  -3   52.39    6.70
   7  10  -3   48.50    6.40
   7 -10  -3   46.90    6.60
   7  10   3   56.39    8.60
   7 -10  -3   48.10    5.00
   7  10   3   44.10    6.70
   8  10  -3   13.30    3.70
   8 -10   3   21.80    4.90
   8  10  -3   12.90    4.50
   8  10  -3   16.90    4.70
   8  10  -3   13.20    3.60
   8  10   3   16.80    4.10
   8 -10  -3   12.70    4.50
   8  10   3   17.00    5.00
   9  10  -3   91.49    7.60
   9 -10   3  100.79    8.10
   9  10  -3   95.99    6.80
   9  10  -3   94.29    9.10
   9  10   3   79.99    8.70
   9 -10  -3   89.19    7.80
   9  10   3   99.49    7.20
   9  10   3  102.99    8.40
  10  10  -3    6.50    4.00
  10  10  -3    7.60    3.00
  10 -10   3    8.00    3.50
  10  10  -3    8.00    2.60
  10  10   3    7.60    2.80
  10  10   3   10.80    3.50
  10  10   3    8.10    4.10
  11 -10   3    1.30    2.30
  11  10  -3    0.80    1.60
  11  10  -3    3.80    3.20
  11  10   3    5.20    1.90
  11  10   3    0.60    1.50
  11  10   3    3.10    2.80
  11  10   3    5.10    2.50
   0 -11  -3  127.09    6.30
   0 -11  -3  122.89    7.60
   0 -11   3  132.59    6.30
   0 -11   3  123.09    8.00
   0 -11   3  122.69    7.90
   0 -11  -3  128.89    7.30
   1 -11   3  181.98    9.40
  -1 -11  -3  158.38    8.90
   1 -11   3  169.48    9.20
  -1 -11  -3  159.98    9.40
  -1 -11  -3  177.98    8.00
   1  11  -3  164.98    8.20
   1 -11  -3  166.48    8.50
   1 -11  -3  171.98    7.90
  -1 -11   3  166.38    8.00
  -1 -11   3  156.68    9.60
   1 -11  -3  160.18    8.80
  -1 -11   3  169.68    9.80
   2 -11   3   55.49    5.10
   2  11  -3   57.19    4.10
  -2 -11  -3   54.09    5.80
   2 -11   3   55.99    5.20
  -2 -11  -3   51.79    3.90
   2 -11  -3   57.09    3.70
  -2 -11   3   69.59    6.10
   2 -11  -3   61.79    4.30
   2 -11  -3   54.19    3.80
  -3 -11  -3   76.69    4.80
   3 -11   3   78.89    5.40
  -3 -11  -3   83.69    7.00
   3 -11   3   68.69    5.40
   3 -11  -3   67.89    4.10
  -3 -11   3   56.59   12.00
  -3 -11   3   88.29    7.30
   4 -11   3   18.50    2.90
   4  11  -3   17.50    4.10
  -4 -11  -3   25.50    4.50
  -4 -11  -3   18.40    2.70
  -4 -11   3   17.00    7.90
   5  11  -3   51.49    7.50
  -5 -11  -3   37.80    3.90
   6 -11   3   42.10    6.80
   6  11  -3   49.20    8.30
   6  11  -3   51.09    8.30
  -6 -11  -3   44.70    4.40
   6 -11  -3   49.80    5.00
   6  11   3   53.19    7.00
   6 -11  -3   75.99   11.90
   6 -11  -3   51.49    8.10
   7  11  -3   12.50    3.70
   7 -11   3   15.80    4.90
   7  11  -3   14.40    4.50
   7  11  -3   19.20    5.10
   7  11   3   14.10    5.30
   7  11   3   11.10    3.90
   7 -11  -3   10.60    4.40
   8  11  -3   25.20    5.40
   8  11  -3   29.80    5.70
   8  11  -3   24.60    4.50
   8  11  -3   40.80    7.60
   8 -11   3   32.90    5.70
   8  11   3   40.10    6.50
   8  11   3   33.10    6.60
   8 -11  -3   29.00    5.30
   9  11  -3    0.70    2.70
   9  11  -3    2.20    3.20
   9  11  -3    1.90    4.20
   9  11  -3    2.00    2.60
   9 -11   3    1.90    3.70
   9  11   3    1.10    2.90
   9 -11  -3    0.80    3.30
   9  11   3   -0.60    4.20
   9  11   3    2.50    3.60
   9  11   3   -0.30    2.40
  10  11  -3    0.20    3.80
  10 -11   3    0.50    2.90
  10  11  -3    3.00    2.40
  10  11  -3    4.90    2.80
  10  11  -3   -0.70    1.40
  10  11   3    3.40    3.70
  10  11   3    0.50    3.20
  10  11   3   -1.20    1.80
  10  11   3    2.20    2.40
   0 -12  -3   33.70    3.10
   0 -12  -3   32.20    4.50
   0 -12   3   34.80    3.10
   0 -12   3   29.10    4.00
   0 -12   3   25.20    3.90
   0 -12  -3   33.10    4.80
   1 -12   3   16.60    3.40
  -1 -12  -3   20.10    3.60
   1  12  -3   16.30    2.50
  -1 -12  -3   13.30    2.90
   1 -12   3   19.10    3.30
  -1 -12  -3   21.40    3.00
   1 -12  -3   15.50    2.80
  -1 -12   3   27.00    4.80
   1 -12  -3   27.80    3.80
  -1 -12   3   21.30    2.90
   1 -12  -3   19.30    2.70
  -1 -12   3   16.60    3.80
   2 -12   3  103.19    6.50
  -2 -12  -3   79.99    7.10
  -2 -12  -3  109.09    5.50
  -2 -12  -3   92.79    7.00
  -2 -12   3   88.99    5.40
   2 -12  -3   71.99    5.20
  -2 -12   3   92.49    7.60
  -3 -12  -3    9.90    3.60
   3 -12   3    9.40    2.40
  -3 -12  -3    9.70    2.50
  -3 -12   3   10.20    3.70
  -4 -12  -3   40.10    5.70
  -4 -12  -3   26.70    3.60
  -4 -12   3   35.70    8.60
  -5 -12  -3   39.20    4.10
   5  12  -3   48.40    8.30
  -5 -12  -3   53.49    7.60
   5 -12  -3   30.80    6.30
   6  12  -3   14.40    5.20
   6  12  -3   10.50    3.80
   6 -12   3    6.70    4.50
   6  12   3   12.60    4.10
   6 -12  -3   12.80    4.60
   6 -12  -3    8.50    5.30
   7 -12   3   23.20    5.10
   7  12  -3   24.70    4.50
   7  12  -3   13.00    5.00
   7  12  -3   22.80    4.90
  -7 -12   3   19.00    3.30
   7  12   3   21.40    4.60
   7 -12  -3   26.60    5.20
   7  12   3   29.10    6.00
   8 -12   3   31.30    5.50
   8  12  -3   27.10    5.20
   8  12  -3   18.00    4.10
   8  12  -3   25.70    5.60
   8  12  -3   27.00    5.50
   8  12   3   27.90    5.90
   8 -12  -3   15.10    4.60
   8  12   3   35.70    5.60
   8  12   3   22.40    4.30
   9 -12   3   -4.40    3.20
   9  12  -3   -2.00    4.20
   9  12  -3    0.20    2.00
   9  12  -3   -0.10    3.10
   9  12  -3    3.50    2.70
   9  12   3   -0.30    2.30
   9 -12  -3    0.20    3.10
   9  12   3   -2.20    3.60
   9  12   3    5.00    3.70
   9  12   3   -1.80    3.70
  10  12  -3   20.00    4.00
  10  12  -3   24.50    3.70
  10 -12   3   28.40    4.40
  10  12  -3   28.90    3.90
  10  12  -3   33.80    4.80
  10  12   3   30.80    5.20
  10  12   3   29.30    3.80
   0 -13  -3   45.80    3.70
   0 -13   3   45.50    5.50
   0 -13   3   48.50    3.60
   0  13  -3   34.80    5.50
   0 -13  -3   35.30    5.20
   1 -13   3  185.18   10.20
  -1 -13  -3  188.28   10.30
  -1 -13  -3  196.98    8.90
  -1 -13   3  178.18   10.70
   1 -13  -3  167.08    9.30
   1 -13  -3  182.58    8.70
  -1 -13   3  177.68    8.80
  -2 -13  -3   45.10    5.90
  -2 -13  -3   38.80    3.80
   2 -13   3   46.30    5.10
  -2 -13   3   37.60    3.90
  -2 -13   3   48.90    6.70
   3 -13   3   15.60    2.70
  -3 -13  -3   16.10    3.90
  -3 -13  -3   16.50    2.70
  -3 -13   3   18.50    2.90
  -3 -13   3   14.40    4.20
  -4 -13  -3   58.29    7.60
  -4 -13  -3   47.30    4.40
   4 -13  -3   54.39    7.80
  -4 -13   3   62.29    7.50
  -4 -13   3   55.69    5.00
  -5 -13  -3   59.49    8.20
  -5 -13  -3   37.00    4.30
   5 -13   3   40.90    6.70
   5  13  -3   37.00    6.20
   5  13  -3   35.70    7.30
  -5 -13   3   35.30    4.60
   5 -13  -3   54.79    6.80
   5 -13  -3   45.20    7.80
   6  13  -3   17.70    4.30
   6 -13   3   20.10    5.10
  -6 -13  -3   24.20    3.30
   6  13  -3   16.90    5.00
  -6 -13   3   23.30    3.50
   6  13   3   28.90    5.00
   6 -13  -3   28.50    5.30
   7  13  -3    2.40    3.40
   7 -13   3   12.30    4.60
   7  13  -3    1.20    3.10
   7  13  -3    5.20    4.00
   7  13   3   11.20    3.90
   7 -13  -3   -0.80    3.70
   7  13   3    3.90    4.70
  -7 -13   3    0.90    2.60
   8  13  -3    7.20    3.60
   8  13  -3    7.80    4.90
   8 -13   3    8.80    4.40
   8  13  -3    1.10    2.60
   8 -13  -3    4.70    4.00
   8  13   3    5.70    4.50
   8  13   3    9.60    3.90
   9  13  -3    2.00    2.60
   9  13  -3    2.40    3.30
   9  13  -3    0.10    1.40
   9 -13   3    4.20    3.30
   9  13  -3    0.10    3.90
   9 -13  -3    2.70    3.00
   9  13   3    5.30    3.40
   9  13   3   -0.20    1.80
   9  13   3    6.60    3.70
  10  13  -3    8.00    2.20
  10  13  -3   12.00    2.50
  10  13  -3    9.20    2.60
  10 -13   3    7.00    2.80
  10  13  -3    3.50    2.80
  10  13   3    2.80    3.00
  10  13   3   12.30    2.40
  10 -13  -3    6.50    2.60
  10  13   3   14.80    3.20
   0 -14  -3   87.29    5.20
   0 -14  -3   73.19    6.40
   0 -14   3   76.49    6.90
   0 -14   3   74.39    4.90
  -1 -14  -3   22.40    4.10
   1 -14   3   22.80    4.00
  -1 -14  -3   20.80    3.40
  -1 -14   3   21.10    3.30
   1 -14  -3   18.90    3.00
  -1 -14   3   21.70    4.20
   1 -14  -3   20.10    3.00
  -2 -14  -3   14.60    4.10
   2 -14   3   20.80    3.30
  -2 -14  -3   26.80    3.60
  -2 -14   3   17.40    2.80
  -2 -14   3   16.40    4.20
  -3 -14  -3   40.60    6.80
   3 -14   3   35.50    4.10
  -3 -14  -3   36.60    4.00
  -3 -14   3   42.30    6.20
   3 -14  -3   28.10    6.40
  -3 -14   3   38.40    4.20
  -4 -14  -3    8.40    2.70
  -4 -14  -3    6.60    4.30
   4 -14   3   10.60    4.60
   4 -14  -3   10.10    4.50
   4 -14  -3    9.00    5.40
  -4 -14   3   13.00    2.90
  -4 -14   3    6.80    4.60
   5  14  -3    5.20    3.70
  -5 -14  -3    2.60    2.50
  -5 -14  -3    0.30    4.10
   5  14  -3   -1.30    3.70
   5 -14   3    3.00    4.10
  -5 -14   3    4.80    2.80
   5 -14  -3    2.00    4.10
   6 -14   3    7.80    4.60
  -6 -14  -3   13.70    2.90
   6  14  -3    7.40    4.30
   6  14  -3   20.90    4.40
   6  14  -3    1.70    3.40
   6  14   3   15.90    4.40
   6 -14  -3   14.80    4.50
  -6 -14   3   11.60    3.00
   7  14  -3    2.00    5.00
   7  14  -3    2.10    3.00
   7  14  -3   -0.30    3.30
   7  14  -3   -3.40    5.70
   7 -14   3    4.80    4.30
  -7 -14   3   -1.90    2.40
   7  14   3    1.70    3.60
   7 -14  -3    3.30    3.80
   8 -14   3    7.90    4.00
   8  14  -3   18.40    4.10
   8 -14  -3    9.40    4.00
   8  14   3   13.30    4.20
   9  14  -3    8.70    3.20
   9 -14   3    7.60    3.20
   9  14  -3    0.50    2.40
   9  14   3    9.20    3.60
   9 -14  -3    1.80    2.80
   0 -15  -3   17.70    2.80
   0 -15   3   14.10    2.70
   0 -15  -3    9.70    3.00
   0 -15   3   14.30    3.70
  -1 -15  -3   74.09    5.10
  -1 -15  -3   64.39    6.80
   1 -15   3   69.09    6.60
   1 -15  -3   65.69    4.80
  -1 -15   3   67.99    5.00
  -1 -15   3   70.19    7.40
   1 -15  -3   61.59    5.20
   2 -15   3    9.50    3.00
  -2 -15  -3   16.60    2.90
  -2 -15  -3    9.90    4.00
   2 -15  -3   11.60    6.00
  -2 -15   3   17.70    4.40
  -2 -15   3   15.10    2.90
  -3 -15  -3    9.60    2.80
  -3 -15  -3    4.20    4.10
  -3 -15  -3    7.30    5.90
   3 -15   3   15.20    4.50
   3 -15   3    0.10    7.50
   3 -15   3    8.60    2.30
  -3 -15   3    9.10    2.80
   3 -15  -3    5.90    4.00
  -3 -15   3    5.30    4.30
   3 -15  -3   28.70    9.50
   3 -15  -3    9.60    5.10
   4 -15   3    6.80    4.10
  -4 -15  -3    7.60    2.70
  -4 -15  -3    7.60    4.50
   4 -15   3    9.20    1.80
   4 -15  -3   16.90    5.90
  -4 -15   3   11.40    4.90
  -4 -15   3    1.80    2.70
   4 -15  -3   32.50   10.20
   4 -15  -3    6.70    4.60
   5 -15   3   15.20    4.50
  -5 -15  -3   14.90    3.10
   5  15  -3   12.20    4.20
  -5 -15  -3   12.70    5.00
  -5 -15   3   17.30    3.30
   5 -15  -3   15.50    4.80
   6 -15   3    9.10    4.30
   6  15  -3    6.90    5.30
   6  15  -3    8.20    4.90
  -6 -15  -3   15.70    2.90
   6  15  -3   11.60    4.00
  -6 -15  -3    3.40    4.60
   6 -15  -3   10.30    4.50
   6  15   3   11.40    4.30
  -6 -15   3   13.90    3.10
   7 -15   3   48.30    7.20
   7  15  -3   50.69    7.00
   7 -15  -3   68.29    7.20
   7  15   3   50.09    7.90
   8 -15   3    3.30    3.70
   8  15  -3   12.00    3.90
   8  15   3   11.10    4.30
   8 -15  -3    7.00    3.40
   9 -15   3   13.30    3.10
   9  15  -3    8.60    2.20
   9  15  -3   29.50    4.90
   9  15  -3   13.90    2.70
   9 -15  -3   10.30    2.90
   9  15   3   20.10    3.80
   0 -16  -3   23.20    5.00
   0 -16   3   21.30    4.20
   0 -16  -3   20.00    3.40
   0 -16   3   25.20    4.90
   0 -16  -3   16.40    5.20
   0 -16  -3   21.40    3.60
   0 -16  -3   24.40    3.70
  -1 -16  -3   20.50    4.80
  -1 -16  -3   23.40    4.20
   1 -16   3   36.20    5.50
   1 -16   3   23.60    5.50
  -1 -16  -3   26.20    5.90
  -1 -16  -3   35.80    4.20
  -1 -16  -3   27.70    5.20
   1 -16   3   32.10    4.70
  -1 -16   3   38.50    4.10
   1 -16  -3   30.00    6.30
   1 -16  -3   41.50    6.20
   1 -16  -3   33.20    4.20
  -1 -16   3   30.60    4.90
   1 -16  -3   32.30    3.80
  -1 -16   3   33.80    5.50
  -2 -16  -3    6.70    6.40
  -2 -16  -3   13.70    4.60
   2 -16   3    9.00    2.70
  -2 -16  -3    7.30    3.60
  -2 -16  -3    7.50    2.70
   2 -16   3   11.30    4.40
  -2 -16  -3   13.30    4.30
   2 -16   3   -4.60    4.70
   2 -16   3    9.50    2.90
  -2 -16   3   10.90    2.80
   2 -16  -3    6.50    1.90
   2 -16  -3    2.00    3.80
  -2 -16   3    2.40    6.30
   2 -16  -3   11.00    5.50
  -2 -16   3   12.20    4.40
   2 -16  -3    6.90    3.40
  -3 -16  -3   27.90    4.30
   3 -16   3   28.20    3.40
  -3 -16  -3   22.30    5.50
   3 -16   3   28.20    5.10
  -3 -16   3   30.80    5.50
  -3 -16   3   22.50    3.40
   3 -16  -3   24.60    5.10
   3 -16  -3   33.40    6.80
   4 -16   3   32.50    5.50
  -4 -16  -3   23.10    5.60
  -4 -16  -3   30.10    4.30
   4 -16  -3   26.40    5.30
  -4 -16   3   29.60    4.40
   4 -16  -3   33.70   10.80
  -4 -16   3   37.70    6.40
  -5 -16  -3   -2.30    4.20
   5  16  -3    3.70    3.80
   5 -16   3    1.90    3.80
  -5 -16  -3    2.50    2.40
  -5 -16   3    2.20    4.70
   5 -16  -3    5.40    4.30
  -5 -16   3    4.30    2.60
   6 -16   3    7.10    4.10
   6  16  -3   13.70    4.20
  -6 -16   3   17.90    3.20
   6 -16  -3   10.40    4.40
   7 -16   3    5.00    4.00
   7  16  -3    0.30    3.20
   7  16  -3   15.10    4.20
   7 -16  -3   12.10    3.90
   7  16   3    5.30    4.20
   8  16  -3   15.80    4.10
   8 -16   3    5.90    3.30
   8  16   3    6.00    4.00
   8 -16  -3    8.60    3.10
   0 -17  -3   39.30    8.00
   0 -17  -3   47.20    4.80
   0 -17   3   45.80    6.30
   0 -17  -3   34.00    6.20
   0 -17   3   44.00    5.40
   0 -17  -3   36.40    4.30
   0 -17  -3   37.90    5.10
  -1 -17  -3   73.99    7.50
   1 -17   3   77.29    6.10
  -1 -17  -3   81.49   10.60
  -1 -17  -3   75.49    6.90
   1 -17   3   76.19    6.60
  -1 -17  -3   82.39    5.60
  -1 -17  -3   73.09    6.30
   1 -17  -3   78.39    7.80
   1 -17  -3   74.59    5.30
  -1 -17   3   80.39    5.50
  -1 -17   3   80.09    7.00
  -1 -17   3   77.29    8.00
   1 -17  -3   73.99    9.30
  -2 -17  -3   49.80    6.30
   2 -17   3   40.10    6.50
   2 -17   3   44.40    4.50
  -2 -17  -3   52.09    7.00
  -2 -17  -3   31.80    6.10
  -2 -17  -3   58.69    4.90
   2 -17  -3   41.70    6.60
  -2 -17   3   53.29    7.80
   2 -17  -3   43.40    8.80
   2 -17  -3   42.90    3.00
  -2 -17   3   41.20    4.30
  -3 -17  -3    8.90    2.80
  -3 -17  -3   17.00    4.80
   3 -17   3   -2.90    7.50
   3 -17   3   14.00    4.30
   3 -17   3   14.30    2.60
  -3 -17  -3   12.10    4.30
  -3 -17   3   15.80    4.90
   3 -17  -3    3.70    6.00
   3 -17  -3    1.60    3.90
  -3 -17   3   10.20    2.80
   3 -17  -3    6.20    5.00
  -4 -17  -3    1.00    4.50
   4 -17   3    4.90    3.80
   4 -17   3    4.40    7.50
  -4 -17  -3    1.60    2.40
  -4 -17   3    4.20    2.50
  -4 -17   3   -1.50    4.40
   4 -17  -3    6.20    7.00
   4 -17  -3    4.60    4.00
   5 -17   3   20.20    4.70
   5  17  -3   16.30    8.40
  -5 -17  -3   10.10    2.60
   5 -17  -3   11.30    4.30
  -5 -17   3   10.80    2.70
   6 -17   3    2.70    3.90
   6  17  -3    0.80    4.20
   6 -17  -3    5.00    3.80
   7 -17   3    2.70    3.40
   7  17  -3    6.00    4.30
   7 -17  -3    0.90    3.20
   7  17   3   -0.70    4.00
   8 -17   3    2.00    2.60
   8  17  -3    7.70    3.30
   8 -17  -3    2.60    2.50
   8  17   3    3.30    3.30
   0 -18   3   67.59    6.00
   0 -18  -3   59.89    9.10
   0 -18  -3   62.89    5.40
   0 -18   3   70.59    6.60
   0 -18  -3   64.49    7.20
   0 -18  -3   69.39    5.20
   1 -18   3    5.30    2.80
   1 -18   3    0.00    3.90
   1 -18   3    3.60    2.60
  -1 -18  -3    7.30    3.20
  -1 -18  -3    6.00    3.80
  -1 -18  -3    0.20    4.50
  -1 -18  -3    5.70    2.60
  -1 -18  -3    8.10    3.10
  -1 -18   3   10.10    3.70
  -1 -18   3    6.60    3.80
   1 -18  -3    3.50    3.00
  -1 -18   3    6.20    2.60
   1 -18  -3    7.20    5.00
   1 -18  -3   -0.90    3.40
  -1 -18   3    0.20    4.40
   1 -18  -3    8.20    2.20
   2 -18   3    2.40    3.70
  -2 -18  -3   12.30    3.60
  -2 -18  -3   -1.40    4.80
  -2 -18  -3    4.60    2.70
  -2 -18  -3   10.60    3.70
  -2 -18  -3    6.30    3.90
   2 -18   3   -3.00    4.70
   2 -18   3    6.60    2.20
  -2 -18   3    4.90    3.80
   2 -18  -3    8.20    4.00
  -2 -18   3    0.90    5.00
   2 -18  -3    0.30    4.20
  -2 -18   3    6.20    2.70
  -2 -18   3    6.60    4.30
   2 -18  -3    7.40    5.00
   3 -18   3   -0.10    1.30
  -3 -18  -3    4.80    2.50
  -3 -18  -3    3.00    3.80
  -3 -18  -3    2.20    3.80
   3 -18   3    4.40    3.60
   3 -18   3    2.30    6.40
  -3 -18   3    2.00    2.60
   3 -18  -3   -1.30    3.80
   3 -18  -3   -3.70    5.90
  -3 -18   3    5.00    4.20
   4 -18   3   16.70    4.20
  -4 -18  -3   28.70    5.00
   4 -18   3   -1.50    7.20
  -4 -18  -3   19.80    4.00
  -4 -18   3   30.40    4.50
   4 -18  -3   20.10    4.60
   5 -18   3   23.50    4.60
   5 -18  -3   14.90    4.50
   6  18  -3    9.80    5.20
   6 -18   3    8.90    3.70
   6 -18  -3   14.60    3.90
   7  18  -3    4.20    3.60
   7 -18   3    3.60    2.80
   7 -18  -3    0.40    2.80
   7  18   3    5.90    3.40
   0 -19  -3   -2.80    3.50
   0 -19  -3    2.40    3.50
   0 -19   3   -3.60    3.50
   0 -19  -3    5.60    3.70
   0 -19  -3    0.30    2.40
   0 -19   3    0.10    2.80
   0 -19  -3    0.60    4.30
  -1 -19  -3    5.90    3.00
  -1 -19  -3   -2.60    3.70
  -1 -19  -3    3.40    2.60
   1 -19   3   -2.40    3.70
  -1 -19  -3   -0.90    3.40
   1 -19   3    2.00    2.40
  -1 -19   3   -3.40    3.80
  -1 -19   3    6.20    3.30
   1 -19  -3   -4.50    3.20
   1 -19  -3    4.50    1.40
   1 -19  -3    2.90    4.30
   1 -19  -3    7.60    4.00
   2 -19   3   12.80    3.90
  -2 -19  -3   11.70    3.80
  -2 -19  -3    8.20    3.30
  -2 -19  -3    9.40    3.70
   2 -19   3   11.10    1.90
   2 -19  -3   10.80    4.20
  -2 -19   3   -0.70    3.70
  -2 -19   3    6.20    3.70
   2 -19  -3    8.10    5.00
   3 -19   3   16.70    4.10
  -3 -19  -3   27.90    5.20
  -3 -19   3   19.10    4.20
   3 -19  -3   17.30    4.60
   4 -19   3    9.70    6.90
  -4 -19  -3   29.70    5.90
   4 -19   3   29.70    5.40
   4 -19  -3   23.90    4.60
   5 -19   3   24.00    4.40
  -5 -19  -3   25.00    4.20
   5 -19  -3   21.80    4.20
   6  19  -3    9.30    4.20
   6 -19   3   14.60    3.20
   6 -19  -3   13.10    3.40
   0 -20  -3   10.20    1.90
   0 -20  -3   13.20    4.80
   0 -20  -3   -1.40    3.20
   0 -20  -3    3.00    3.10
   0 -20   3   -0.20    3.40
   0 -20   3   12.50    2.70
  -1 -20  -3    2.70    2.40
  -1 -20  -3   24.30    4.00
   1 -20   3   19.70    3.10
  -1 -20  -3   -2.00    3.50
   1 -20  -3   -1.30    3.20
  -1 -20   3   15.30    3.30
   1 -20  -3   17.10    3.70
  -1 -20   3   -1.60    3.20
   2 -20   3    2.90    3.70
  -2 -20  -3   -2.20    3.20
   2 -20   3    0.00    4.40
  -2 -20  -3    1.50    2.90
   2 -20  -3   -3.10    3.70
  -2 -20   3    6.90    3.20
   2 -20  -3   -1.50    3.20
  -2 -20   3    3.10    3.50
  -3 -20  -3    6.80    3.20
   3 -20   3    3.10    3.00
   3 -20   3    0.20    5.30
  -3 -20   3    0.90    3.10
   3 -20  -3   -5.00    5.00
   3 -20  -3    3.30    3.30
   4 -20   3    0.20    2.60
  -4 -20  -3    0.50    3.00
   4 -20   3    8.30    6.50
   4 -20  -3    3.80    3.10
   4 -20  -3    2.50    6.10
  -4 -20   3   -1.60    3.00
   5 -20   3    3.20    2.50
  -5 -20  -3    5.00    2.80
   5 -20  -3    6.90    3.10
   6 -20   3    2.20    2.10
  -6 -20  -3    2.00    2.40
   6 -20  -3   -0.60    2.30
   0 -21   3    3.90    2.00
   0 -21  -3    1.30    1.80
   0 -21   3   -0.90    3.50
   0 -21  -3   -2.00    3.30
  -1 -21  -3   -0.50    4.00
   1 -21   3   -1.60    3.30
  -1 -21  -3    3.20    2.50
  -1 -21  -3    3.20    1.80
   1 -21  -3   -3.50    3.30
  -1 -21   3    2.40    2.40
  -1 -21   3    2.60    3.50
   1 -21  -3    2.10    2.60
  -2 -21  -3    0.50    3.30
   2 -21   3    0.40    4.30
  -2 -21  -3   -0.50    2.30
   2 -21  -3   -0.60    3.80
   2 -21  -3    0.00    2.60
  -2 -21   3   -0.80    2.60
  -2 -21   3    1.00    3.80
   3 -21   3    8.90    5.60
   3 -21   3    3.60    2.40
  -3 -21  -3    8.30    2.80
   3 -21  -3    7.10    2.90
   3 -21  -3   -2.80    4.80
  -3 -21   3    7.80    2.80
   4 -21   3   -3.40    6.10
  -4 -21  -3    2.30    2.40
   4 -21   3    2.70    2.00
  -4 -21   3    2.20    2.30
   4 -21  -3    3.70    2.70
   4 -21  -3    3.70    5.20
  -1 -22  -3    0.40    2.70
   1 -22   3    0.30    3.50
   1 -22  -3    4.00    1.60
  -1 -22   3    5.00    1.80
   1 -22  -3   -5.20    3.20
  -1 -22   3    0.20    3.70
   2 -22   3   -0.10    3.80
  -2 -22  -3    6.30    1.50
  -2 -22  -3    4.70    3.50
  -2 -22   3    5.00    2.10
   2 -22  -3   -3.10    3.60
   2 -22  -3    3.10    1.90
   3 -22   3    2.60    5.00
  -3 -22  -3   12.80    2.50
   3 -22  -3    2.40    3.90
  -3 -22   3    9.60    2.30
   3 -22  -3    7.30    2.20
   0   0   4 9565.04  394.66
   0   0  -4 9999.00  394.86
   1   0   4  738.93   29.40
   1   0   4  682.23   29.50
  -1   0  -4  730.43   29.30
   1   0  -4  703.23   29.10
   2   0   4 5939.41  236.68
  -2   0  -4 5713.83  236.58
   2   0  -4 5842.62  236.28
  -2   0   4 6138.59  236.68
   2   0   4 5659.83  236.88
   3   0   4    0.80    1.80
  -3   0  -4   -2.80    1.70
   3   0   4   -0.90    1.90
   3   0  -4    0.50    1.30
   3   0  -4    1.80    1.40
   3   0  -4   -0.20    1.00
  -3   0   4    1.70    1.40
   4   0   4   32.00    2.70
   4   0   4   29.10    3.80
   4   0  -4   34.70    3.00
   4   0  -4   35.30    3.00
   5   0  -4   31.70    3.50
   5   0   4   33.70    4.30
   5   0   4   34.30    4.50
   5   0  -4   30.40    3.00
   5   0  -4   26.40    3.10
   5   0   4   31.30    2.90
   6   0   4  292.97   13.40
   6   0  -4  288.67   12.80
   6   0   4  292.17   14.00
   6   0  -4  283.77   13.30
   6   0  -4  314.07   13.80
   6   0   4  306.07   14.60
   7   0   4  143.69    7.80
   7   0   4  144.39    8.60
   7   0  -4  141.59    8.10
   8   0  -4   70.59    6.00
   8   0   4   72.99    5.60
   8   0   4   98.99    6.60
   9   0  -4   24.00    3.90
   9   0   4   27.50    4.00
   9   0  -4   27.80    8.20
   9   0   4   38.50    5.80
  10   0   4   -2.50    4.00
  10   0  -4    0.70    4.90
  10   0   4    6.00    1.80
  11   0   4   -3.20    2.80
  12   0   4    0.40    2.40
   0  -1  -4 1444.46   58.89
   0   1  -4 1454.55   58.99
   0  -1  -4 1487.05   58.89
   0  -1   4 1429.56   58.99
  -1  -1  -4   10.60    2.00
   1   1  -4   10.90    1.90
   1  -1   4   10.10    1.70
   1   1  -4    8.90    1.80
   1  -1   4   11.60    2.30
  -1  -1   4    7.90    1.50
   1   1   4    5.20    1.50
   1   1   4    6.00    1.40
   1  -1  -4    6.00    1.20
  -1  -1   4    7.70    2.10
  -1   1  -4    9.50    1.60
   2   1  -4  411.56   17.40
  -2  -1  -4  410.66   17.60
   2   1  -4  441.46   17.50
   2  -1   4  419.76   17.70
   2  -1   4  407.26   17.90
   2  -1  -4  397.56   17.00
   2   1   4  428.86   17.80
   2   1   4  405.46   18.00
   2  -1  -4  414.16   16.90
  -2  -1   4  429.86   18.10
  -2   1  -4  391.96   17.50
   3  -1   4  878.81   36.40
   3   1  -4  851.91   36.00
   3   1  -4  846.72   36.00
   3  -1   4  876.31   36.80
   3  -1   4  891.31   35.90
  -3  -1  -4  805.42   36.30
   3   1  -4  946.91   36.20
   3   1   4  818.22   36.70
   3  -1  -4  951.40   35.70
   3   1   4  889.51   36.50
   3  -1  -4  863.91   36.00
   3  -1  -4  867.21   35.60
  -3  -1   4  887.41   36.80
   4  -1   4  204.48    9.30
   4  -1   4  197.18    9.90
   4   1  -4  222.68    9.60
   4   1  -4  213.78    9.50
   4  -1  -4  190.48    8.90
   4   1   4  200.88    9.20
   4  -1  -4  209.48    9.50
   4   1   4  196.88   10.40
   4   1   4  215.78   10.20
   4  -1  -4  212.28    9.10
  -4  -1   4  201.88   10.70
   5  -1   4   52.59    3.90
   5  -1   4   61.09    5.00
   5  -1   4   62.39    5.00
   5   1  -4   55.39    4.30
   5   1  -4   61.29    4.40
   5   1  -4   61.59    4.40
   5   1   4   63.19    5.70
   5   1   4   64.39    5.70
   5  -1  -4   69.29    3.90
   5   1   4   60.19    3.90
   5  -1  -4   64.79    4.20
   6   1  -4  183.68    9.10
   6   1  -4  169.68    8.60
   6  -1   4  181.18    9.80
   6   1  -4  179.88    9.10
   6  -1   4  174.18    8.70
   6  -1   4  184.58    9.70
   6  -1  -4  177.98    8.50
   6   1   4  182.78    9.90
   6   1   4  176.28   10.20
   6  -1  -4  198.18    9.20
   6   1   4  181.38    8.80
   7  -1   4   94.89    6.70
   7   1  -4   88.39    6.10
   7   1  -4   86.19    5.40
   7  -1   4   95.79    5.90
   7  -1  -4   97.09    6.10
   7   1   4   96.19    5.90
   7   1   4   93.09    6.90
   8   1  -4   57.89    5.30
   8  -1   4   45.90    5.00
   8  -1   4   54.29    4.90
   8   1   4   57.19    5.80
   8  -1  -4   58.59    5.30
   9   1  -4  185.08   10.00
   9  -1   4  173.58    8.80
   9  -1   4  170.38   10.50
   9   1  -4  148.09   11.40
   9   1   4  176.48    9.60
   9   1   4  180.88    9.20
   9   1   4  172.08   10.20
   9   1   4  180.58   10.80
   9  -1  -4  178.78    9.90
  10   1  -4    2.70    5.00
  10  -1   4    4.20    3.40
  10  -1   4   -3.20    3.80
  10  -1   4    7.60    1.50
  10   1   4    7.30    2.10
  10   1   4   -1.10    3.60
  11   1  -4   -2.20    3.00
  11  -1   4   -3.00    3.10
  11   1   4    0.20    3.10
  12  -1   4   -1.90    2.20
  12   1   4    0.90    2.40
   0   2  -4 1104.19   45.60
   0   2  -4 1091.99   45.50
   0  -2  -4 1107.79   45.40
   0  -2   4 1099.29   45.50
   0  -2   4 1103.39   45.90
   0  -2  -4 1181.28   45.30
   1  -2   4  621.74   26.10
   1   2  -4  631.54   26.20
  -1  -2  -4  659.43   26.10
   1  -2   4  652.93   26.50
   1  -2  -4  618.04   25.60
  -1   2  -4  615.84   26.10
  -1  -2   4  617.84   26.60
  -1  -2   4  614.44   26.20
   1   2   4  651.23   26.20
   2   2  -4   95.89    5.10
   2   2  -4  105.09    5.50
   2  -2   4   97.29    5.40
  -2  -2  -4  105.99    5.50
   2  -2   4  105.99    5.90
  -2   2  -4   98.89    5.30
  -2  -2   4  100.39    6.40
   2   2   4   91.39    5.70
   2   2   4  101.49    5.50
  -2  -2   4   95.09    5.30
   3   2  -4  133.19    6.80
   3  -2   4  134.99    6.80
   3   2  -4  132.69    6.30
  -3  -2  -4  126.39    6.80
   3  -2   4  130.59    7.20
   3  -2   4  127.89    6.00
   3  -2  -4  125.29    6.20
   3   2   4  119.69    7.10
   3   2   4  125.19    7.10
   4  -2   4  273.27   12.60
   4   2  -4  270.07   12.60
   4   2  -4  264.07   12.10
   4  -2   4  269.17   12.00
   4  -2  -4  271.67   11.40
  -4  -2   4  271.67   13.70
   4  -2  -4  287.87   11.50
   4  -2  -4  284.07   12.20
   4   2   4  293.67   13.10
   4   2   4  262.97   11.80
   4   2   4  258.77   13.30
   5  -2   4  304.27   14.40
   5  -2   4  321.97   14.50
   5   2  -4  307.57   14.00
   5  -2   4  309.57   14.00
   5   2  -4  299.67   14.20
   5   2  -4  323.97   14.50
   5   2   4  313.87   13.80
   5  -2  -4  316.57   13.30
   5   2   4  304.27   15.20
   5   2   4  313.37   15.10
   5  -2  -4  355.86   14.20
   6   2  -4  206.28   10.50
   6  -2   4  219.98   10.10
   6   2  -4  198.38   10.10
   6   2  -4  218.68   10.30
   6  -2   4  220.48   10.80
   6  -2   4  205.48   10.60
   6  -2  -4  204.28    9.10
   6   2   4  187.98   11.50
   6  -2  -4  229.18   10.40
   6   2   4  211.58    9.90
   6   2   4  206.28   11.00
   7   2  -4    3.70    2.40
   7   2  -4    5.20    2.10
   7  -2   4    6.00    2.50
   7  -2   4    7.00    2.30
   7  -2  -4    3.30    2.20
   7   2   4   10.00    3.10
   8   2  -4   34.50    4.70
   8  -2   4   37.90    4.30
   8  -2   4   46.80    4.50
   8   2   4   43.80    5.70
   8  -2  -4   37.10    4.70
   9   2  -4   30.60    4.50
   9  -2   4   37.50    4.60
   9  -2   4   26.50    3.50
   9  -2   4   27.30    4.80
   9   2  -4   41.50    7.40
   9   2  -4   27.10    3.10
   9   2   4   25.00    4.40
   9  -2  -4   27.20    4.60
   9   2   4   26.00    4.40
   9   2   4   29.90    4.20
  10  -2   4   14.80    3.90
  10   2  -4   17.60    5.20
  10   2   4   23.10    5.50
  10   2   4   21.30    3.60
  11   2  -4    4.50    4.90
  11   2  -4    1.70    3.10
  11  -2   4   -1.70    2.90
  11   2   4   -2.40    2.90
  12  -2   4    0.50    2.50
  12   2  -4   -1.10    2.40
  12   2   4   -0.50    2.30
   0   3  -4  305.87   13.50
   0  -3  -4  293.27   13.20
   0  -3   4  321.57   14.20
   0  -3  -4  318.47   13.20
   0  -3   4  319.27   13.60
   1   3  -4   76.49    4.50
   1  -3   4   76.69    4.20
  -1  -3  -4   80.49    4.30
   1  -3   4   84.69    5.30
   1  -3  -4   67.59    3.30
  -1   3  -4   68.49    4.30
   1  -3  -4   67.19    3.30
  -1  -3   4   68.99    4.50
  -1  -3   4   67.89    5.10
   1   3   4   65.99    4.20
   2  -3   4  149.39    7.00
  -2  -3  -4  158.18    7.80
   2  -3   4  165.98    8.20
   2  -3   4  158.98    7.60
   2   3  -4  157.68    7.10
   2   3  -4  162.98    7.90
  -2   3  -4  151.38    7.50
  -2  -3   4  157.08    8.90
   2   3   4  151.88    7.80
  -2  -3   4  158.08    7.70
  -3  -3  -4   59.39    4.60
   3  -3   4   72.79    4.70
   3  -3   4   70.99    3.90
   3   3  -4   68.89    3.90
   3   3  -4   72.99    4.90
   3  -3  -4   63.39    3.90
   3   3   4   70.29    5.00
   4   3  -4   57.99    4.70
   4   3  -4   55.39    3.80
   4  -3   4   57.19    4.30
   4  -3   4   53.79    3.60
   4   3   4   51.29    5.80
   4  -3  -4   49.00    3.90
   4   3   4   41.60    4.70
   4   3   4   49.00    3.20
  -4  -3   4   54.99    6.60
   5   3  -4   56.89    5.00
   5  -3   4   67.49    4.90
   5   3  -4   62.39    4.20
   5  -3   4   57.49    4.20
   5   3  -4   64.09    5.10
   5  -3   4   64.59    4.80
   5  -3  -4   64.89    4.40
   5   3   4   53.69    6.40
   5   3   4   60.69    5.90
   6  -3   4   17.50    2.80
   6  -3   4   12.90    2.70
   6  -3   4   17.00    2.60
   6   3  -4   17.00    2.70
   6   3  -4   12.70    2.60
   6   3  -4   13.00    2.80
   6  -3  -4   12.90    2.60
   6   3   4   13.20    3.20
   7   3  -4   14.20    2.80
   7  -3   4   19.60    2.90
   7  -3   4   17.40    2.90
   7   3  -4   14.30    2.80
   7  -3  -4   13.10    2.80
   7   3   4   14.70    3.50
   8   3  -4   59.89    5.10
   8  -3   4   56.89    5.20
   8   3  -4   62.49    5.40
   8  -3  -4   57.79    5.40
   8   3   4   56.99    6.40
   9   3  -4   12.00    4.50
   9   3  -4    8.10    2.10
   9   3  -4   -1.30    4.80
   9  -3   4    7.70    1.80
   9  -3   4    7.80    2.80
   9  -3   4    7.60    3.20
   9   3  -4    5.90    3.10
   9  -3   4   14.00    4.20
   9   3   4    4.60    3.50
   9   3   4    4.90    3.20
   9   3   4    8.40    2.90
   9  -3  -4   10.10    3.30
   9   3   4   -0.10    2.60
  10   3  -4    2.20    4.40
  10  -3   4    5.70    3.30
  10   3  -4   -1.60    4.00
  10  -3   4    2.30    4.20
  10   3   4    3.20    2.30
  10   3   4   -1.10    3.00
  10   3   4    1.90    2.90
  11  -3   4   17.00    3.40
  11   3  -4   15.10    4.90
  11   3   4   21.40    5.10
  11   3   4   13.70    2.50
  12  -3   4    1.10    2.50
  12   3  -4    0.60    2.40
  12   3   4   -0.70    2.10
   0  -4  -4    9.70    1.60
   0   4  -4    8.10    1.90
   0  -4   4    6.40    2.10
   0  -4   4    8.00    2.00
   0  -4  -4    7.10    1.70
   1   4  -4    5.60    2.10
   1  -4   4    4.70    1.90
  -1  -4  -4    3.60    1.80
   1  -4   4    5.70    1.90
  -1  -4   4    7.30    2.10
  -1   4  -4    5.40    1.80
  -1  -4   4    5.60    2.20
   1  -4  -4    7.70    1.10
   1   4   4    4.60    1.80
   1  -4  -4    4.70    1.10
   2  -4   4   17.50    2.30
   2  -4   4   14.20    2.30
   2   4  -4   15.80    2.00
   2   4  -4   10.90    2.50
   2  -4   4   12.80    2.30
  -2  -4  -4   10.30    2.20
   2   4   4   14.40    2.60
  -2  -4   4   11.50    2.80
  -2  -4   4   10.30    2.20
   3   4  -4   10.00    1.80
   3  -4   4    9.20    2.20
   3  -4   4    8.80    1.60
   3   4  -4    8.10    2.60
  -3  -4  -4   10.00    2.60
   3   4   4   14.80    3.20
   3  -4  -4   10.30    1.70
   4  -4   4    4.90    1.80
   4   4  -4    4.20    2.30
   4  -4   4    5.00    2.00
   4  -4   4    4.70    2.00
   4   4  -4    2.60    1.50
   4   4  -4    4.80    2.20
   4  -4  -4    4.00    1.70
  -4  -4   4    1.80    2.70
   4   4   4    0.10    3.00
   5   4  -4   24.30    4.00
   5   4  -4   28.10    4.10
   5   4  -4   26.40    3.20
   5  -4   4   25.40    3.70
   5  -4   4   27.60    3.00
   5  -4   4   25.80    3.60
   5  -4  -4   27.40    3.50
   5   4   4   29.70    5.10
  -5  -4   4   20.50    3.90
   6   4  -4    0.00    2.20
   6   4  -4    1.80    1.80
   6  -4   4   -0.30    1.80
   6  -4   4   -0.60    1.90
   6  -4   4   -1.00    1.90
   6   4  -4   -1.10    2.30
   6  -4  -4   -0.80    2.00
   6   4   4    0.60    2.60
   6   4   4   -1.50    2.40
   7  -4   4    7.20    2.50
   7   4  -4    4.80    2.60
   7  -4   4    8.40    2.20
   7   4  -4    8.50    2.60
   7  -4  -4    6.30    2.70
   7   4   4    9.10    3.40
   8   4  -4    6.70    2.70
   8   4  -4   10.60    4.70
   8  -4   4    9.50    3.00
   8   4  -4   12.00    2.90
   8  -4  -4   10.90    3.00
   8   4   4   10.40    3.60
   9   4  -4   -1.70    4.50
   9  -4   4    3.70    3.70
   9  -4   4   -0.40    6.00
   9   4  -4    0.90    2.00
   9   4  -4    1.20    3.70
   9   4   4   -0.10    3.10
   9   4   4    0.50    3.40
   9   4   4    0.40    2.80
   9   4   4    1.10    2.70
  10   4  -4   -0.50    4.20
  10   4  -4    8.10    4.40
  10   4  -4    4.80    1.60
  10  -4   4    9.30    3.60
  10  -4   4    4.60    4.10
  10   4   4    4.20    3.00
  10   4   4    6.50    2.50
  10   4   4   -0.70    2.70
  10   4   4    7.50    2.90
  11   4  -4    5.40    4.60
  11  -4   4    1.10    3.30
  11   4  -4   -0.50    2.70
  11  -4   4    2.80    2.80
  11   4   4    0.10    2.70
  11   4   4    3.20    1.80
  11   4   4    3.50    4.40
  12   4  -4    0.70    2.30
  12   4  -4    1.50    3.70
  12  -4   4    2.90    2.70
  12   4   4    1.30    3.80
  12   4   4   -0.40    1.90
   0   5  -4    2.70    2.00
   0  -5   4    2.40    2.10
   0  -5  -4    3.00    1.80
   0  -5  -4    2.90    1.60
   0  -5   4    3.30    2.10
   1   5  -4    2.60    2.20
  -1  -5  -4    2.60    1.90
   1  -5   4    3.20    2.10
   1   5  -4    3.90    1.40
   1  -5   4    0.60    2.10
  -1  -5   4    5.90    2.60
   1  -5  -4    1.10    1.20
   1   5   4    3.30    1.80
  -1  -5   4    5.50    2.30
  -1   5  -4    2.20    2.00
   1  -5  -4    1.90    1.30
   2  -5   4    5.20    2.00
   2   5  -4    3.40    1.60
   2  -5   4    4.20    1.50
   2  -5   4    3.50    2.30
   2   5  -4    2.10    2.20
  -2  -5  -4    5.90    2.30
   2  -5  -4    2.50    0.80
   2  -5  -4    2.70    1.30
   2  -5  -4    4.10    0.80
  -2  -5   4    5.60    2.20
  -2  -5   4    1.40    2.30
   3   5  -4   15.80    2.20
  -3  -5  -4   11.60    2.80
   3  -5   4   13.60    2.40
   3  -5   4   13.20    2.20
   3   5  -4   10.70    2.70
   3  -5  -4   13.00    2.00
   4   5  -4    7.70    1.90
   4   5  -4   12.20    3.00
   4  -5   4   10.30    2.20
   4  -5   4   10.00    2.10
   4  -5   4   10.20    2.10
   4   5  -4    6.90    2.60
   4   5   4    8.60    3.00
  -4  -5   4    6.20    3.50
   4  -5  -4   10.90    2.10
   5  -5   4   23.30    3.20
   5   5  -4   24.20    4.40
   5   5  -4   18.80    3.10
   5   5  -4   21.40    3.10
   5  -5   4   34.50    3.70
   5  -5   4   29.40    3.50
   5   5   4   22.40    3.60
   5   5   4   19.80    3.50
   5   5   4   18.00    5.20
   5  -5  -4   29.40    3.50
  -5  -5   4   23.10    4.50
   6  -5   4   21.60    3.40
   6  -5   4   21.80    3.40
   6   5  -4   19.70    3.20
   6   5  -4   18.60    3.60
   6   5  -4   21.80    3.40
   6  -5   4   18.40    3.40
   6   5   4   16.90    3.70
   6   5   4   20.10    3.80
   6  -5  -4   29.50    3.50
   7  -5   4   -2.20    2.00
   7   5  -4    3.10    2.60
   7   5  -4    0.60    2.30
   7  -5  -4    0.70    2.30
   7   5   4    1.50    3.10
   8   5  -4    6.20    4.10
   8   5  -4    5.10    2.90
   8  -5   4    5.80    2.80
   8   5  -4    3.60    2.50
   8   5   4   -0.40    3.40
   8  -5  -4    3.20    2.80
   9  -5   4    1.80    3.70
   9  -5   4    2.10    7.10
   9   5  -4    7.70    4.20
   9   5  -4    2.70    4.10
   9   5  -4    5.60    2.30
   9   5   4    2.60    3.40
   9   5   4    8.40    3.20
   9   5   4    6.60    3.60
   9   5   4    0.20    2.90
  10  -5   4   19.20    5.80
  10   5  -4    3.10    4.10
  10   5  -4    1.00    1.90
  10  -5   4   -3.30    3.10
  10   5  -4   -1.30    3.90
  10   5   4   -0.50    2.30
  10   5   4    2.30    4.70
  10   5   4    1.90    3.10
  10   5   4    5.20    4.80
  10   5   4    0.10    3.00
  11  -5   4   20.70    3.60
  11   5  -4   16.60    4.90
  11   5   4   17.20    4.80
  11   5   4   15.00    2.30
  12   5  -4    0.00    2.00
  12   5  -4    3.10    3.50
  12   5   4   -3.70    3.50
  12   5   4   -1.50    1.40
   0  -6  -4  125.29    6.20
   0   6  -4  111.79    6.70
   0  -6   4  116.29    8.10
   0  -6   4  120.89    6.80
   1  -6   4  193.38   10.40
   1  -6   4  200.78    9.40
   1   6  -4  200.48    9.70
  -1  -6  -4  192.58    9.30
   1   6  -4  188.38    8.60
  -1  -6   4  202.08   11.10
  -1  -6   4  195.88    9.70
   1  -6  -4  166.48    8.60
   2   6  -4   52.89    4.90
   2   6  -4   52.29    3.40
  -2  -6  -4   52.99    4.30
   2  -6   4   49.40    4.10
   2  -6  -4   49.40    2.90
  -2  -6   4   51.79    6.50
   2  -6  -4   46.60    2.90
   2  -6  -4   49.30    3.20
  -2  -6   4   46.30    4.70
  -3  -6  -4   17.50    3.10
   3   6  -4   21.40    3.40
   3  -6   4   16.00    2.70
   3   6  -4   16.60    2.40
   3  -6   4   23.20    3.30
   3  -6  -4   16.10    2.50
   4  -6   4   17.60    2.60
   4  -6   4   18.20    2.50
   4   6  -4   13.90    3.10
   4  -6   4   18.90    3.30
   4   6  -4   10.60    2.20
   4   6  -4   12.10    2.90
   4   6   4   18.20    3.60
   4  -6  -4   10.60    2.10
  -4  -6   4   11.90    4.90
   5   6  -4   16.90    3.30
   5  -6   4   13.70    2.40
   5  -6   4   12.00    2.30
   5   6  -4   13.70    2.40
   5   6  -4   17.20    3.50
   5  -6   4   17.30    3.10
   5   6   4   10.00    3.20
   5  -6  -4   11.10    2.30
  -5  -6   4   12.10    4.60
   6   6  -4  105.39    6.40
   6  -6   4  100.79    5.80
   6   6  -4  101.69    7.70
   6  -6   4  105.39    6.30
   6   6  -4  106.69    7.40
   6  -6  -4  109.09    6.50
   6   6   4   89.69    7.80
   7   6  -4    1.10    2.40
   7   6  -4    2.20    2.70
   7  -6   4    2.90    2.60
   7  -6  -4    4.00    2.70
   7   6   4    4.50    3.50
   8  -6   4    8.50    3.10
   8   6  -4   13.90    3.10
   8   6  -4   20.10    5.00
   8  -6   4   10.80    4.20
   8   6  -4   14.70    5.20
   8   6   4   16.30    4.50
   8  -6  -4   11.10    3.10
   8   6   4   13.40    3.90
   9   6  -4    6.40    3.00
   9  -6   4    0.80    7.00
   9   6  -4   -2.00    3.40
   9   6  -4    7.90    2.90
   9   6  -4    5.90    2.50
   9   6  -4    7.40    4.30
   9   6  -4   11.10    3.00
   9  -6   4   -2.70    3.50
   9   6   4    7.90    3.30
   9   6   4   -0.20    3.00
   9   6   4    4.90    3.40
   9   6   4    5.60    3.70
  10   6  -4    0.90    2.00
  10   6  -4    2.30    4.00
  10   6  -4   -0.80    3.40
  10  -6   4   -1.10    3.20
  10   6   4    4.40    3.20
  10   6   4    0.20    2.50
  10   6   4    2.90    4.80
  10   6   4   -1.30    2.60
  11   6  -4   -0.20    2.60
  11   6  -4    5.30    4.40
  11  -6   4    5.00    2.80
  11   6   4    4.20    2.00
  11   6   4   -1.20    2.10
  11   6   4    8.30    4.40
  11   6   4    3.20    2.70
  12   6  -4    0.30    2.00
  12   6  -4    6.20    3.50
  12   6   4    2.70    3.60
  12   6   4    0.10    1.40
   0  -7   4   97.39    7.60
   0  -7   4   93.69    6.20
   0  -7  -4  100.39    5.60
   1   7  -4    1.20    1.50
  -1  -7  -4    0.10    2.20
   1  -7   4    4.30    3.10
   1  -7   4    1.20    2.10
   1  -7  -4    2.00    1.30
  -1  -7   4    3.40    2.50
  -1  -7   4    0.90    2.50
   2   7  -4  101.29    5.40
   2   7  -4  111.69    7.00
   2  -7   4  111.69    6.40
  -2  -7  -4  115.69    6.70
   2  -7  -4  105.59    5.20
   2  -7  -4  100.69    5.30
   3   7  -4  126.99    6.50
  -3  -7  -4  127.99    8.80
  -3  -7  -4  128.89    7.70
   3  -7   4  126.19    6.40
   3  -7   4  114.49    6.80
   3   7  -4  111.79    7.80
   3   7  -4  123.99    8.00
   3  -7   4  134.29    7.10
   3  -7  -4  128.29    6.30
  -4  -7  -4   48.10    5.70
   4   7  -4   53.59    4.00
   4   7  -4   51.39    5.50
   4   7  -4   54.79    5.70
  -4  -7  -4   50.09    3.60
   4  -7   4   54.19    4.30
   4  -7   4   53.69    4.30
   4  -7   4   56.09    3.90
   4  -7  -4   53.49    4.00
   4   7   4   48.00    6.00
  -4  -7   4   43.60    6.70
   5  -7   4  119.79    6.70
   5   7  -4  118.79    8.20
   5   7  -4  121.39    8.00
   5  -7   4  111.39    6.40
   5   7  -4  128.99    6.80
  -5  -7  -4  103.19    6.00
   5  -7   4  130.99    6.60
  -5  -7   4  115.89   12.40
   5  -7  -4  120.49    6.70
   5   7   4  111.39    8.30
   6  -7   4   61.39    5.10
   6   7  -4   78.49    5.40
   6   7  -4   71.99    6.60
   6   7   4   70.29    7.30
   6  -7  -4   73.69    5.10
   7   7  -4   58.99    6.50
   7  -7   4   51.99    5.00
   7   7  -4   51.29    5.10
   7  -7  -4   59.39    5.30
   7   7   4   59.99    7.70
   8  -7   4    5.90    2.80
   8   7  -4    0.50    3.00
   8  -7   4   12.80    4.30
   8   7  -4    0.30    3.40
   8   7  -4    5.50    3.20
   8   7  -4    4.30    3.80
   8   7  -4    1.10    2.70
   8   7   4    1.00    3.10
   8  -7  -4    6.60    2.90
   8   7   4    1.90    4.00
   8   7   4    3.60    3.50
   9   7  -4   13.10    4.50
   9  -7   4    7.80    4.00
   9   7  -4    7.50    3.20
   9   7  -4    8.60    2.80
   9   7  -4    6.00    3.00
   9   7  -4    9.80    3.20
   9   7   4   10.00    3.50
   9   7   4   14.40    4.30
   9   7   4   10.80    3.30
  10   7  -4    8.20    4.30
  10  -7   4   14.30    3.90
  10   7  -4    3.30    2.30
  10   7  -4    0.90    3.30
  10   7   4    6.00    3.40
  10   7   4    9.60    4.80
  10   7   4    6.40    2.70
  10   7   4   -0.10    2.40
  11  -7   4    0.80    2.70
  11   7  -4   -0.50    3.90
  11   7  -4   -0.60    2.30
  11   7   4   -0.80    1.60
  11   7   4   -1.50    2.70
  11   7   4    0.40    1.90
  11   7   4    2.30    3.80
   0  -8   4    3.60    2.50
   0  -8   4    1.60    2.60
   0  -8  -4    1.40    1.90
  -1  -8  -4    2.60    2.20
   1  -8   4    6.40    2.40
  -1  -8  -4    0.50    2.00
   1   8  -4    1.30    1.60
   1  -8   4   -0.10    2.20
  -1  -8   4    0.50    2.50
   1  -8  -4    2.10    1.50
  -1  -8   4    1.30    2.40
  -2  -8  -4  166.08    8.70
   2  -8   4  169.88    8.50
  -2  -8  -4  161.98    7.40
   2   8  -4  149.39    7.60
   2  -8   4  170.08    8.30
  -2  -8  -4  175.88    8.90
   2  -8  -4  141.99    7.30
   2  -8  -4  148.69    7.40
  -2  -8   4  158.28    6.70
   3  -8   4   45.00    4.20
   3   8  -4   38.90    3.20
  -3  -8  -4   40.50    3.20
  -3  -8  -4   37.10    5.00
   3   8  -4   38.90    5.50
   3  -8   4   37.40    4.10
   3  -8  -4   40.30    3.30
  -3  -8   4   42.90    7.60
   4   8  -4   56.69    6.10
   4  -8   4   54.29    4.00
   4  -8   4   50.09    4.30
   4  -8   4   50.59    4.30
  -4  -8  -4   49.70    3.70
   4   8  -4   54.69    4.10
  -4  -8   4   54.19    9.50
   4  -8  -4   55.39    4.00
  -5  -8  -4  202.68    9.90
   5   8  -4  235.68   10.70
   5   8  -4  210.38   11.90
   5  -8   4  220.38   10.50
   5  -8   4  203.18   10.40
   5  -8   4  208.28   10.10
   5  -8  -4  235.38   10.60
  -5  -8   4  208.48   16.40
   5   8   4  208.08   12.30
   6  -8   4   99.99    6.30
   6   8  -4   92.29    6.20
   6   8  -4   95.59    7.90
   6  -8  -4   94.39    6.20
   6   8   4   94.99    8.80
   7   8  -4   42.60    5.50
   7   8  -4   45.20    8.60
   7  -8   4   31.30    4.10
   7   8   4   30.50    5.60
   7  -8  -4   29.10    7.10
   7  -8  -4   31.20    4.50
   8   8  -4   12.50    4.80
   8  -8   4   20.90    4.80
   8   8  -4   11.70    3.30
   8  -8   4   13.90    3.40
   8   8  -4   16.30    3.90
   8   8  -4   11.50    3.40
   8   8   4   17.00    3.90
   8  -8  -4   14.20    3.80
   9   8  -4  112.79    7.60
   9   8  -4   94.79    9.30
   9   8  -4  103.59    7.80
   9   8  -4  112.29    7.80
   9   8  -4  101.49    7.00
   9  -8   4  115.79    8.60
   9   8   4  122.39    9.20
   9   8   4  114.59    8.80
   9   8   4  104.29    7.50
  10  -8   4   27.00    4.50
  10   8  -4   19.00    3.50
  10   8  -4   21.20    3.90
  10   8  -4   21.80    5.00
  10   8   4   32.00    4.70
  10   8   4   26.30    5.20
  10   8   4   34.10    6.00
  11   8  -4    8.80    3.90
  11  -8   4   10.50    3.10
  11   8   4   14.90    2.30
  11   8   4   16.90    4.40
  11   8   4   14.40    3.10
   0  -9  -4   44.30    4.00
   0  -9  -4   49.80    4.30
   0  -9   4   54.69    5.00
   0  -9   4   45.10    4.80
   0  -9  -4   47.40    3.20
   1  -9   4   15.50    2.90
   1  -9   4   15.90    2.80
   1   9  -4   12.70    2.20
  -1  -9  -4   12.90    2.50
  -1  -9  -4   23.90    3.90
  -1  -9  -4   12.10    1.90
  -1  -9   4   11.50    3.20
   1  -9  -4   11.30    2.20
   1  -9  -4   13.50    2.20
  -1  -9   4   10.50    2.80
   1  -9  -4   10.70    1.70
   2  -9   4   82.59    5.30
   2   9  -4   64.29    4.30
  -2  -9  -4   62.49    5.60
  -2  -9  -4   65.29    4.20
  -2  -9  -4   70.59    5.70
   2  -9   4   69.39    5.20
   2  -9  -4   66.19    3.80
  -2  -9   4   74.09    6.10
   2  -9  -4   62.49    3.70
   2  -9  -4   68.19    4.20
  -3  -9  -4  184.58   10.30
  -3  -9  -4  185.98    8.80
   3   9  -4  182.48    9.10
   3  -9   4  194.18    9.80
   3  -9   4  190.68    9.50
   3   9  -4  211.78   11.00
   3  -9  -4  175.98    8.80
  -3  -9   4  191.88   13.90
  -4  -9  -4   57.19    6.20
   4   9  -4   66.09    6.50
   4  -9   4   59.19    4.60
   4  -9   4   66.19    4.70
  -4  -9  -4   52.99    4.10
   4   9  -4   55.39    4.40
   4  -9  -4   62.69    4.40
  -4  -9   4   63.89    9.90
   5   9  -4   10.30    3.60
  -5  -9  -4   12.40    2.40
   5  -9   4   12.90    3.30
   5   9  -4    7.00    2.30
   5   9   4   10.00    4.00
   5  -9  -4   12.30    2.60
  -5  -9   4    7.70    6.90
   6   9  -4   44.90    6.80
   6  -9  -4   41.40    4.40
   6   9   4   40.80    5.90
   7  -9   4   13.10    4.50
   7   9  -4   11.70    4.30
   7   9  -4   13.40    4.20
   7   9   4    4.40    4.60
   7  -9  -4    4.00    5.60
   7  -9  -4   10.20    3.20
   7  -9  -4   12.30    4.70
   8   9  -4   60.59    6.10
   8  -9   4   71.69    7.50
   8   9  -4   56.99    8.00
   8   9  -4   78.39    7.80
   8   9  -4   70.19    7.20
   8   9   4   60.69    7.30
   8  -9  -4   62.89    7.40
   8   9   4   75.19    9.00
   9   9  -4   46.00    6.00
   9  -9   4   51.19    6.90
   9   9  -4   58.49    5.40
   9   9  -4   56.49    6.10
   9   9  -4   60.09    7.90
   9   9  -4   53.19    6.50
   9   9   4   59.39    7.30
   9   9   4   68.39    7.50
   9   9   4   50.99    5.90
  10   9  -4   27.90    5.10
  10   9  -4   32.30    5.40
  10  -9   4   33.60    5.60
  10   9  -4   33.80    4.30
  10   9   4   30.20    4.70
  10   9   4   34.20    6.10
  10   9   4   38.50    5.80
  11  -9   4   -1.30    2.40
  11   9  -4   -0.30    1.80
  11   9  -4    2.10    3.30
  11   9   4    8.70    4.00
  11   9   4    1.10    2.00
  11   9   4   -0.60    1.50
  11   9   4   -0.30    2.60
   0 -10   4  177.88    9.80
   0 -10   4  178.68    9.70
   0 -10  -4  176.98    8.90
   0 -10   4  177.28    8.20
   0 -10  -4  173.08    8.20
   0 -10  -4  187.38    9.40
  -1 -10  -4  243.28   10.40
   1 -10   4  235.68   11.50
   1 -10   4  238.78   11.70
  -1 -10  -4  215.68   11.50
   1  10  -4  223.68   10.50
  -1 -10  -4  222.18   11.20
  -1 -10   4  233.98   12.00
  -1 -10   4  236.58   12.00
   1 -10  -4  215.68   10.20
   1 -10  -4  232.08   10.70
   1 -10  -4  233.18   10.90
   2 -10   4  193.28    9.70
   2 -10   4  185.98    9.90
   2  10  -4  193.88    9.10
  -2 -10  -4  188.88    8.70
  -2 -10  -4  181.38   10.10
  -2 -10  -4  178.98   10.00
   2 -10  -4  179.58    8.80
   2 -10  -4  186.08    8.50
  -2 -10   4  193.48   10.50
   3 -10   4  163.78    8.60
  -3 -10  -4  159.98    7.70
   3  10  -4  161.38    8.10
  -3 -10  -4  168.28    9.50
   3 -10   4  160.78    8.80
   3 -10  -4  158.08    7.00
  -3 -10   4  165.78    9.90
  -3 -10   4  128.19   14.10
   4  10  -4   28.90    3.70
  -4 -10  -4   28.50    3.40
  -4 -10  -4   35.20    5.80
   4 -10   4   37.40    3.90
   4  10  -4   38.40    5.90
  -4 -10   4   35.00    9.10
   4 -10  -4   31.70    3.40
   5  10  -4  130.09    9.70
  -5 -10  -4  127.89    7.10
   5 -10  -4  142.19    7.60
  -5 -10   4  142.59   15.30
  -6 -10  -4    7.40    2.40
   6  10  -4   10.80    4.20
   6 -10  -4    4.70    4.90
   6 -10  -4   14.50    2.90
   6  10   4    3.00    3.90
   7  10  -4   31.50    5.50
   7  10  -4   22.40    4.10
   7 -10   4   30.10    5.60
   7  10  -4   26.50    5.00
   7 -10  -4   29.50    7.00
   7 -10  -4   29.40    4.40
   7  10   4   30.90    6.50
   7  10   4   42.80    6.60
   7 -10  -4   25.00    5.20
   8  10  -4   43.30    7.70
   8  10  -4   31.70    6.30
   8 -10   4   36.80    5.90
   8  10  -4   33.10    5.30
   8  10  -4   37.30    5.60
   8  10   4   33.20    6.20
   8  10   4   26.90    4.70
   8 -10  -4   33.10    5.60
   9  10  -4   21.10    3.90
   9  10  -4   18.40    3.20
   9  10  -4   18.90    5.10
   9 -10   4   21.10    4.50
   9  10   4   29.80    5.70
   9  10   4   17.80    3.80
   9  10   4   18.70    4.20
  10  10  -4    0.10    2.20
  10 -10   4   -1.00    3.10
  10  10  -4   -0.30    4.20
  10  10  -4    1.00    2.70
  10  10  -4   -0.20    2.50
  10  10   4    1.50    3.60
  10  10   4    2.40    2.50
  10  10   4    2.00    3.20
  10  10   4    0.10    1.80
  11  10  -4    4.30    3.40
  11 -10   4    6.60    2.50
  11  10   4    7.10    2.60
  11  10   4    6.00    3.10
  11  10   4   10.60    2.10
   0 -11   4   39.70    5.20
   0 -11  -4   42.20    4.60
   0 -11   4   37.60    5.30
   0 -11  -4   40.20    3.30
   0 -11   4   47.90    3.30
   0 -11  -4   36.30    4.30
  -1 -11  -4   38.70    4.90
  -1 -11  -4   37.50    3.10
   1 -11   4   44.10    4.90
   1 -11   4   39.40    4.70
   1  11  -4   37.50    3.40
  -1 -11  -4   36.50    4.30
   1 -11  -4   35.60    3.80
   1 -11  -4   32.20    3.10
  -1 -11   4   38.60    5.10
   1 -11  -4   35.60    3.90
  -1 -11   4   31.40    4.20
   2  11  -4   16.80    2.50
   2 -11   4   19.50    3.20
   2 -11   4   24.60    4.20
  -2 -11  -4   14.00    3.40
  -2 -11  -4   14.20    3.30
  -2 -11  -4   18.80    2.50
  -2 -11   4   19.10    3.90
   2 -11  -4   19.00    2.50
   2 -11  -4   18.90    2.90
   3 -11   4   20.40    4.00
  -3 -11  -4   29.60    3.30
   3 -11   4   27.20    4.10
  -3 -11  -4   28.40    4.20
   3  11  -4   25.80    3.20
   3 -11  -4   23.30    2.00
  -3 -11   4   13.90    8.40
  -3 -11   4   23.90    4.10
   4  11  -4   18.70    4.20
  -4 -11  -4   24.30    4.40
   4 -11   4   19.90    2.80
  -4 -11  -4   19.40    3.20
  -4 -11   4   16.50    8.30
  -5 -11  -4   25.20    3.10
   5  11  -4   33.80    5.60
  -5 -11  -4   27.90    4.90
  -5 -11   4   11.90    7.50
   6  11  -4    0.40    4.00
   6  11  -4    2.30    4.50
   6 -11   4    6.80    4.20
  -6 -11  -4    0.20    2.10
   6 -11  -4    6.30    4.50
   6 -11  -4    1.60    4.70
   6  11   4    3.20    4.30
   6 -11  -4    1.20    2.50
   7  11  -4   18.60    4.90
   7  11  -4   20.60    4.20
   7  11  -4   21.10    5.20
   7 -11   4   25.40    5.20
   7 -11  -4   16.50    4.70
   7  11   4   21.10    4.40
   7  11   4   16.70    5.40
   8  11  -4    9.30    3.50
   8  11  -4    1.80    4.00
   8  11  -4    1.80    3.10
   8 -11   4    6.50    4.30
   8  11  -4    7.40    4.20
   8  11  -4   -0.10    2.90
   8  11   4    1.90    3.40
   8 -11  -4    3.00    4.00
   8  11   4    2.60    4.40
   8  11   4    3.00    3.40
   9 -11   4    3.90    3.80
   9  11  -4    5.50    3.20
   9  11  -4    1.40    2.50
   9  11  -4    0.30    2.50
   9  11  -4   -2.40    4.20
   9  11   4    2.40    4.00
   9  11   4    3.80    3.60
   9  11   4    0.80    4.90
   9  11   4   -0.70    2.50
   9 -11  -4    0.10    3.10
  10  11  -4    4.70    2.70
  10  11  -4    2.60    2.30
  10  11  -4   -0.30    1.60
  10  11  -4    4.90    2.40
  10  11  -4   -0.20    3.70
  10 -11   4   -2.20    2.90
  10  11   4    5.80    3.30
  10  11   4    4.00    2.50
  10  11   4    4.80    3.50
  10  11   4    0.80    2.00
   0 -12   4   15.50    3.30
   0 -12   4   13.90    3.40
   0 -12  -4   14.70    2.30
   0 -12  -4   25.10    4.20
   0 -12  -4   13.10    3.00
   0 -12   4   19.10    2.90
  -1 -12  -4   11.60    2.90
  -1 -12  -4   16.40    3.00
   1  12  -4   18.60    2.90
   1 -12   4   14.90    3.40
   1 -12   4   16.50    3.30
  -1 -12  -4   20.30    2.90
  -1 -12   4   20.30    3.20
   1 -12  -4   16.10    2.80
   1 -12  -4   13.80    2.50
   1 -12  -4   13.90    2.20
  -1 -12   4   13.10    3.60
   2 -12   4    5.70    2.60
   2  12  -4    1.10    2.00
  -2 -12  -4    2.40    2.00
  -2 -12  -4    3.30    2.80
  -2 -12  -4    2.10    2.90
  -2 -12   4    2.00    3.40
   2 -12  -4    0.80    1.60
  -3 -12  -4    3.40    2.10
  -3 -12  -4    4.40    3.30
   3 -12   4    3.50    2.40
  -3 -12   4   -6.40    7.90
  -3 -12   4    1.20    3.30
  -4 -12  -4   21.10    3.30
   4 -12   4   22.80    3.80
  -4 -12  -4   21.70    4.40
  -4 -12   4   20.60    8.50
  -5 -12  -4    2.30    4.30
   5  12  -4    6.80    4.40
  -5 -12  -4    5.10    2.30
   5 -12  -4    5.40    4.70
  -6 -12  -4   16.40    2.80
   6  12  -4   12.60    4.00
   6  12  -4   18.70    5.00
   6 -12   4   22.50    5.00
   6 -12  -4   20.60    6.30
   6 -12  -4   17.60    5.00
   6  12   4   15.60    4.40
   7  12  -4    5.30    4.10
   7  12  -4    0.10    3.20
   7 -12   4    1.70    4.10
   7  12  -4   -2.30    3.80
   7  12  -4    0.70    2.90
   7  12   4    1.90    3.50
  -7 -12   4    0.50    2.50
   7 -12  -4    6.10    4.00
   7  12   4    8.50    5.10
   8  12  -4    4.50    3.20
   8  12  -4    3.70    4.60
   8  12  -4    3.60    3.80
   8 -12   4    3.90    4.20
   8  12  -4    0.90    3.30
   8  12  -4    5.20    4.20
   8  12  -4   -1.00    2.30
   8  12   4    7.60    4.70
   8  12   4    7.10    5.40
   8  12   4    4.10    3.60
   8 -12  -4    2.00    3.80
   9 -12   4   -2.80    3.20
   9  12  -4   -0.80    2.10
   9  12  -4    0.20    4.40
   9  12  -4    2.60    3.10
   9  12  -4    1.10    2.60
   9  12   4   -1.20    3.80
   9  12   4   -0.30    2.20
   9 -12  -4   -0.30    2.90
   9  12   4    2.50    3.50
  10  12  -4    6.90    2.70
  10  12  -4    6.60    2.20
  10  12  -4    7.40    2.40
  10  12  -4    5.40    3.30
  10 -12   4    4.20    2.90
  10  12   4    6.80    2.70
  10  12   4    8.90    3.20
  10  12   4    9.20    2.60
   0 -13  -4   -0.90    2.50
   0 -13  -4    1.40    1.90
   0 -13   4    1.60    1.90
   0  13  -4    2.20    1.90
   0 -13   4    1.50    3.00
   1 -13   4   36.50    5.50
  -1 -13  -4   43.20    3.70
  -1 -13  -4   41.60    5.50
   1 -13  -4   36.60    3.40
  -1 -13   4   35.50    3.60
   1 -13  -4   37.30    4.20
  -1 -13   4   39.50    5.90
  -2 -13  -4   27.90    4.40
  -2 -13  -4   28.80    3.60
   2 -13   4   23.20    3.60
   2 -13  -4   21.00    3.00
  -2 -13   4   21.50    4.40
  -2 -13   4   23.30    3.50
  -3 -13  -4    4.10    2.30
  -3 -13  -4   -4.90    3.00
   3 -13   4    1.20    2.30
  -3 -13   4    1.90    3.90
  -3 -13   4   -0.20    2.50
  -4 -13  -4    5.70    2.40
  -4 -13  -4    4.50    4.00
   4 -13  -4    8.70    5.00
  -4 -13   4   -5.90    7.50
   5  13  -4    0.20    4.50
  -5 -13  -4    5.10    2.40
   5 -13   4    5.80    2.60
  -5 -13  -4    1.90    4.20
   5  13  -4    5.50    3.70
   5 -13   4    3.20    4.10
   5 -13  -4    6.80    4.80
   5 -13  -4    9.20    4.20
   6  13  -4   -1.10    3.00
  -6 -13  -4    6.60    2.50
   6  13  -4    9.00    3.80
   6  13  -4    6.60    4.40
   6 -13   4    9.50    4.20
   6  13   4   20.30    4.60
  -6 -13   4   10.30    3.00
   6 -13  -4    9.40    4.30
   7  13  -4    1.00    2.90
   7 -13   4   10.90    4.60
   7  13  -4   10.00    4.90
   7  13  -4    7.70    3.60
  -7 -13   4    9.50    2.90
   7 -13  -4   11.20    4.40
   7  13   4   17.40    5.30
   7  13   4   12.40    4.10
   8 -13   4    6.80    4.40
   8  13  -4   10.50    3.70
   8  13  -4   13.80    3.80
   8  13  -4   15.60    4.90
   8 -13  -4   14.60    4.40
   8  13   4   11.20    4.10
   8  13   4   11.80    4.70
   9  13  -4   24.40    3.90
   9  13  -4   10.80    2.90
   9  13  -4   16.30    4.50
   9 -13   4   11.80    3.70
   9  13   4    8.40    3.30
   9 -13  -4   10.40    3.30
   9  13   4   19.10    4.20
  10  13  -4   19.30    4.00
  10  13  -4   10.50    2.90
  10 -13   4   12.70    2.90
  10  13  -4   14.30    2.30
  10  13   4   13.90    2.50
  10  13   4   17.60    3.30
  10  13   4   11.50    3.20
   0 -14   4   16.00    3.70
   0 -14  -4   14.00    2.50
   0 -14  -4    9.50    2.90
   0 -14   4   14.40    2.60
  -1 -14  -4   16.10    2.80
  -1 -14  -4   17.40    3.70
   1 -14   4   21.40    3.80
   1 -14  -4   13.10    2.50
  -1 -14   4   18.80    2.80
   1 -14  -4   15.10    2.70
  -1 -14   4   14.50    3.90
  -2 -14  -4   33.80    3.70
   2 -14   4   30.80    5.00
  -2 -14  -4   27.00    4.40
  -2 -14   4   23.50    3.70
  -2 -14   4   30.70    5.00
   3 -14   4   25.00    4.20
  -3 -14  -4   32.60    5.10
  -3 -14  -4   30.40    4.10
   3 -14  -4   20.80    5.80
  -3 -14   4   26.40    3.50
  -3 -14   4   28.70    5.20
   4 -14   4   14.10    4.40
  -4 -14  -4    8.70    4.30
  -4 -14  -4   19.20    3.10
  -4 -14   4   20.50    3.40
   4 -14  -4    9.60    5.10
  -4 -14   4   26.10    5.50
   4 -14  -4   16.20    4.70
  -5 -14  -4   29.60    5.50
  -5 -14  -4   27.00    4.10
   5 -14   4   22.90    5.20
   5  14  -4   18.20    4.50
  -5 -14   4   19.50    3.40
   5 -14  -4   27.20    6.50
   5 -14  -4   27.70    5.50
   6 -14   4    5.30    4.20
   6  14  -4   -2.20    4.30
   6  14  -4    4.60    3.60
  -6 -14  -4   -1.30    5.00
  -6 -14  -4    1.50    2.30
   6  14  -4    0.30    2.90
   6  14   4    2.50    3.80
   6 -14  -4    4.00    4.00
  -6 -14   4    5.80    2.80
   7 -14   4   11.10    4.60
   7  14  -4   11.60    7.00
   7  14  -4   12.50    3.80
   7 -14  -4   10.50    4.20
  -7 -14   4   17.00    3.10
   7  14   4   15.20    4.30
   8  14  -4   59.89    7.30
   8 -14   4   60.29    6.90
   8 -14  -4   57.79    6.70
   8  14   4   59.59    7.70
   9 -14   4    8.70    3.30
   9  14  -4   13.80    2.80
   9  14  -4   28.20    5.40
   9  14  -4   15.40    3.00
   9  14   4   21.70    4.10
   9 -14  -4   13.70    3.20
   0 -15   4    5.70    3.40
   0 -15  -4    1.00    2.60
   0 -15  -4    2.20    2.30
  -1 -15  -4   92.99    7.60
  -1 -15  -4  107.39    6.10
   1 -15   4  103.09    7.70
  -1 -15   4   92.29    5.70
   1 -15  -4   69.69    6.00
  -1 -15   4   84.69    8.10
   1 -15  -4   81.89    5.60
  -2 -15  -4    0.70    3.60
   2 -15   4    6.40    3.00
  -2 -15  -4    4.30    2.60
   2 -15  -4    5.40    4.10
  -2 -15   4    3.10    2.50
  -2 -15   4    7.80    4.00
  -3 -15  -4   89.09    7.70
   3 -15   4   96.99    5.80
   3 -15   4   81.19    7.70
  -3 -15  -4   96.69    8.60
  -3 -15  -4   92.99    5.90
   3 -15  -4  105.29   10.60
  -3 -15   4   95.59    6.30
  -3 -15   4   76.99    8.80
   3 -15  -4   96.69    8.40
   3 -15  -4   65.69    9.20
  -4 -15  -4   66.69    5.10
   4 -15   4   68.59    7.20
  -4 -15  -4   70.59    8.20
   4 -15   4   63.49    4.40
   4 -15  -4   67.09    9.60
  -4 -15   4   56.99    8.30
   4 -15  -4   85.19    7.90
   4 -15  -4   40.50   10.20
  -4 -15   4   64.89    5.50
  -5 -15  -4  132.09   10.40
  -5 -15  -4  120.09    7.10
   5 -15   4  110.39    9.30
   5  15  -4  112.49    9.20
   5 -15  -4  114.69    9.30
  -5 -15   4  111.99    7.20
   6  15  -4   18.40    5.00
   6 -15   4   21.30    4.70
  -6 -15  -4   16.20    5.00
   6  15  -4   24.40    4.60
  -6 -15  -4   25.60    3.30
   6  15  -4   17.90    4.90
   6  15   4   14.90    5.40
   6 -15  -4   33.10    5.50
  -6 -15   4   29.70    4.40
   7  15  -4   19.80    4.30
   7 -15   4   19.90    5.00
   7 -15  -4   19.10    4.50
   7  15   4   18.30    4.40
   8  15  -4   46.70    6.40
   8 -15   4   34.70    5.90
   8  15   4   47.50    6.90
   8 -15  -4   28.50    4.60
   9  15  -4    5.20    2.10
   9 -15   4    3.00    2.60
   9  15  -4    7.30    2.80
   9  15  -4    6.30    2.40
   9  15   4    8.20    3.60
   9 -15  -4    5.30    2.50
   0 -16   4   79.29    6.70
   0 -16  -4   74.99    5.70
   0 -16   4   79.49    7.70
   0 -16  -4   80.09    6.20
   0 -16  -4   93.39    5.70
   0 -16  -4   74.39    9.50
   0 -16  -4   78.19    7.80
   1 -16   4   83.29    6.80
  -1 -16  -4   95.49    7.60
   1 -16   4  105.69    7.70
  -1 -16  -4   94.09    6.90
  -1 -16  -4  103.89    6.20
  -1 -16  -4   78.79    9.50
  -1 -16  -4   85.39    7.90
   1 -16  -4   89.39    5.90
  -1 -16   4   97.29    8.60
   1 -16  -4   92.79   10.60
  -1 -16   4  102.99    7.60
   1 -16  -4   91.49    5.70
  -1 -16   4  104.99    6.00
   1 -16  -4  102.89    8.50
  -2 -16  -4   41.60   11.50
   2 -16   4   22.00    3.60
   2 -16   4   23.10    3.40
  -2 -16  -4   22.20    3.40
  -2 -16  -4   22.80    4.20
  -2 -16  -4   15.90    4.50
  -2 -16  -4   21.10    4.60
   2 -16   4   21.20    5.10
  -2 -16   4   13.60    3.00
   2 -16  -4   18.70    6.20
   2 -16  -4   19.70    5.10
  -2 -16   4   23.00    4.90
   2 -16  -4   21.20    2.60
   3 -16   4   23.40    3.60
  -3 -16  -4   22.10    4.50
  -3 -16  -4   27.20    4.20
  -3 -16  -4   26.80    5.40
   3 -16   4   15.50    4.40
  -3 -16  -4   26.20    5.00
  -3 -16   4   27.50    5.50
   3 -16  -4   29.20    5.50
  -3 -16   4   25.40    4.00
   3 -16  -4   19.50    6.10
   4 -16   4  273.97   11.80
  -4 -16  -4  300.07   15.90
   4 -16   4  263.17   15.00
  -4 -16  -4  280.77   13.00
  -4 -16   4  260.97   13.00
   4 -16  -4  289.27   17.10
   4 -16  -4  268.07   15.30
  -4 -16   4  258.37   15.60
   5  16  -4   27.40    4.90
  -5 -16  -4   24.90    3.40
  -5 -16  -4   27.50    5.40
   5 -16   4   17.00    4.60
   5 -16  -4   35.60    6.50
  -5 -16   4   25.80    4.00
   6  16  -4   51.29    7.60
   6 -16   4   48.90    7.00
   6 -16  -4   48.10    6.90
   7 -16   4   64.69    6.60
   7  16  -4   67.69    8.00
   7  16   4   53.59    7.70
   7 -16  -4   63.19    6.80
   8  16  -4    1.40    3.40
   8 -16   4    1.00    3.00
   8  16  -4    0.80    1.20
   8 -16  -4    1.50    2.70
   8  16   4   -0.40    3.80
   0 -17  -4  156.18   12.40
   0 -17  -4  152.08    8.50
   0 -17   4  160.98   10.20
   0 -17   4  156.88    9.40
   0 -17  -4  150.08    8.70
   0 -17  -4  145.99   10.50
   0 -17  -4  166.18    8.40
  -1 -17  -4   26.40    4.20
  -1 -17  -4   42.00    4.60
   1 -17   4   42.40    5.20
  -1 -17  -4   32.50    5.00
   1 -17   4   38.20    5.40
  -1 -17  -4   34.10    6.40
  -1 -17  -4   36.00    6.40
   1 -17  -4   36.10    5.00
  -1 -17   4   38.30    5.40
   1 -17  -4   38.80    8.30
   1 -17  -4   32.10    3.80
   1 -17  -4   26.10    5.20
  -1 -17   4   38.30    4.20
  -1 -17   4   36.80    5.90
  -2 -17  -4   22.00    4.40
   2 -17   4   28.60    4.20
   2 -17   4   21.00    4.60
  -2 -17  -4   33.20    6.20
  -2 -17  -4   29.90    5.20
   2 -17   4   26.90    5.40
  -2 -17  -4   26.50    4.10
  -2 -17   4   22.00    3.30
  -2 -17   4   25.90    5.30
   2 -17  -4   30.30    5.60
   2 -17  -4   26.40    6.40
  -3 -17  -4   -1.80    3.60
   3 -17   4    1.30    3.40
  -3 -17  -4    4.00    3.70
   3 -17   4   -0.50    6.80
   3 -17   4    2.40    1.50
  -3 -17  -4    4.30    4.40
  -3 -17  -4    4.50    2.60
   3 -17  -4    4.10    3.90
  -3 -17   4    8.50    4.90
   3 -17  -4    7.10    5.80
  -3 -17   4   -0.20    2.40
   3 -17  -4    4.40    5.10
   4 -17   4    1.90    3.70
  -4 -17  -4   -2.70    4.00
  -4 -17  -4    1.40    2.30
   4 -17   4   -4.70    8.90
   4 -17  -4    4.20    7.20
  -4 -17   4    0.10    2.40
  -4 -17   4    0.00    4.50
   4 -17  -4   -3.10    3.80
   5 -17   4   49.60    6.80
  -5 -17  -4   47.20    4.90
   5  17  -4   60.29    7.20
   5 -17  -4   47.80    7.20
   6  17  -4   18.50    5.30
   6 -17   4   10.90    4.20
   6 -17  -4    9.20    4.10
   7  17  -4    4.00    4.40
   7 -17   4    1.70    3.20
   7 -17  -4    4.30    3.30
   7  17   4   -0.30    4.10
   8 -17   4    1.70    2.60
   8  17  -4    7.70    3.10
   8  17   4    2.60    3.40
   8 -17  -4    4.10    2.40
   0 -18  -4   30.60    4.20
   0 -18  -4   25.10    5.90
   0 -18   4   36.70    5.20
   0 -18  -4   26.20    4.30
   0 -18   4   27.60    4.40
   0 -18  -4   38.80    6.40
  -1 -18  -4   46.20    4.60
  -1 -18  -4   35.50    5.40
  -1 -18  -4   36.90    4.90
  -1 -18  -4   34.30    6.30
   1 -18   4   36.80    4.70
  -1 -18  -4   34.40    7.70
   1 -18   4   35.40    5.20
   1 -18  -4   36.20    6.00
  -1 -18   4   45.10    6.00
   1 -18  -4   35.80    3.30
   1 -18  -4   42.50    8.70
  -1 -18   4   32.70    5.10
   2 -18   4    7.80    3.60
  -2 -18  -4    1.60    3.30
  -2 -18  -4    8.30    3.40
  -2 -18  -4    3.90    3.80
   2 -18   4    6.90    2.30
  -2 -18  -4   -1.00    4.50
  -2 -18  -4    3.40    2.60
   2 -18   4    0.00    5.20
  -2 -18   4    3.90    4.00
   2 -18  -4    4.80    4.80
  -2 -18   4    1.80    4.50
   2 -18  -4   -3.10    3.90
   2 -18  -4    4.10    4.00
  -2 -18   4    3.10    3.90
  -2 -18   4    5.60    2.60
   3 -18   4    7.50    1.70
  -3 -18  -4   10.20    4.10
   3 -18   4    7.30    3.80
  -3 -18  -4   11.20    2.90
  -3 -18  -4    8.00    4.10
   3 -18   4   -8.10    6.50
  -3 -18  -4    6.10    3.80
   3 -18  -4   19.20    4.70
  -3 -18   4   15.00    4.90
   3 -18  -4    9.40    5.10
   3 -18  -4   -4.50    5.40
  -3 -18   4    9.30    2.80
  -4 -18  -4   47.80    6.80
   4 -18   4   42.90    6.20
   4 -18  -4   35.80    6.60
   5 -18   4   -1.00    3.30
   5 -18  -4   -1.10    3.40
   6 -18   4    0.80    3.20
   6  18  -4    7.70    4.90
   6 -18  -4    4.30    3.40
   7  18  -4    2.00    3.40
   7 -18   4   -0.10    2.50
   7  18   4   -1.20    3.20
   7 -18  -4    2.30    2.80
   0 -19  -4   -2.30    3.80
   0 -19  -4    1.50    2.30
   0 -19  -4    2.20    3.70
   0 -19  -4    0.70    2.20
   0 -19   4    2.10    2.90
   0 -19   4   -3.50    3.50
   0 -19  -4   -1.40    4.40
  -1 -19  -4   -1.80    3.90
  -1 -19  -4    6.40    2.50
  -1 -19  -4    9.90    3.10
  -1 -19  -4    4.60    4.50
   1 -19   4    4.10    2.60
   1 -19   4   -5.40    3.70
  -1 -19  -4    0.90    3.50
   1 -19  -4    5.30    4.70
  -1 -19   4    1.00    3.80
   1 -19  -4   -2.00    3.30
   1 -19  -4   10.50    4.10
  -1 -19   4    7.50    3.30
  -2 -19  -4    1.90    3.40
  -2 -19  -4    2.00    3.80
   2 -19   4   -4.00    4.90
  -2 -19  -4    2.20    3.10
   2 -19   4    0.80    1.70
   2 -19  -4    0.60    4.60
  -2 -19   4   -0.40    3.70
   2 -19  -4    2.40    3.70
  -2 -19   4    2.20    3.50
   2 -19  -4   -3.20    4.10
   3 -19   4    3.60    5.80
   3 -19   4    4.70    3.40
  -3 -19  -4    1.10    3.30
   3 -19  -4   -2.60    5.00
  -3 -19   4    9.50    4.10
   3 -19  -4    5.30    4.00
   4 -19   4   16.60    4.00
   4 -19   4    6.10    6.90
  -4 -19  -4   21.50    4.20
   4 -19  -4   16.10    4.20
  -5 -19  -4   12.30    3.70
   5 -19   4    8.40    3.30
   5 -19  -4    9.60    3.60
  -6 -19  -4    8.20    3.00
   6 -19   4    4.90    2.60
   6  19  -4    2.20    4.00
   6 -19  -4    5.90    2.90
   0 -20   4   -0.40    3.50
   0 -20   4    0.10    2.40
   0 -20  -4    0.20    2.90
   0 -20  -4    1.90    4.10
   0 -20  -4   -0.60    1.40
   0 -20  -4   -2.80    3.30
  -1 -20  -4    0.10    2.60
   1 -20   4    4.10    2.10
  -1 -20  -4   -0.70    3.40
   1 -20   4    0.50    3.50
  -1 -20  -4    0.50    2.40
   1 -20  -4    3.00    2.90
   1 -20  -4    1.00    4.20
   1 -20  -4   -6.00    3.00
  -1 -20   4    6.50    2.90
  -1 -20   4   -1.70    3.30
  -2 -20  -4   -0.20    3.30
   2 -20   4   -0.40    4.40
  -2 -20  -4    3.20    2.90
  -2 -20  -4   -1.90    2.40
   2 -20  -4   -4.40    3.80
  -2 -20   4   -1.30    3.00
  -2 -20   4    0.20    3.50
   2 -20  -4    3.40    3.50
   3 -20   4    3.00    3.00
   3 -20   4   -1.40    5.70
  -3 -20  -4    5.60    3.10
  -3 -20   4    4.70    3.40
   3 -20  -4    2.00    3.30
   3 -20  -4   -3.30    4.80
  -4 -20  -4    1.80    2.90
   4 -20   4   -0.60    6.50
   4 -20   4    6.30    2.70
   4 -20  -4   -5.40    5.80
   4 -20  -4   10.50    3.50
  -4 -20   4    6.50    3.10
   5 -20   4    2.60    2.20
  -5 -20  -4    3.00    2.80
   5 -20  -4    0.60    2.90
   0 -21   4    2.90    2.10
   0 -21  -4    2.00    2.50
   0 -21  -4   -3.20    3.50
   0 -21   4    2.40    3.50
  -1 -21  -4   -0.50    2.40
   1 -21   4    0.20    1.20
  -1 -21  -4    0.40    4.00
   1 -21   4    0.70    3.30
  -1 -21  -4    2.80    1.50
  -1 -21   4   -4.00    3.30
   1 -21  -4    0.60    2.50
   1 -21  -4   -3.70    3.40
  -1 -21   4    2.00    2.40
  -2 -21  -4   -2.00    3.30
   2 -21   4    1.20    4.10
  -2 -21  -4    1.60    2.20
   2 -21  -4    2.00    2.40
  -2 -21   4   -1.10    3.70
   2 -21  -4   -4.80    3.80
  -2 -21   4    3.20    2.60
  -3 -21  -4    6.10    2.60
   3 -21   4   -1.00    5.50
   3 -21  -4   -0.90    4.40
  -3 -21   4    3.10    2.40
   3 -21  -4    6.90    2.90
  -4 -21  -4    3.40    2.50
   4 -21   4    1.30    2.00
   4 -21   4   -2.70    7.90
   4 -21  -4    3.00    2.70
   4 -21  -4   -3.30    5.70
  -4 -21   4   -0.10    2.20
   1 -22   4   -2.30    3.50
  -1 -22  -4    2.50    3.10
  -1 -22  -4    9.60    2.60
   1 -22  -4   -4.60    3.30
  -1 -22   4   13.80    2.50
   1 -22  -4    5.50    1.90
  -1 -22   4    1.00    3.50
   2 -22   4   -1.80    4.00
  -2 -22  -4    0.50    4.40
   2 -22  -4   -4.00    3.50
  -3 -22  -4    4.50    1.50
   3 -22   4   -2.10    4.30
   3 -22  -4    2.70    2.20
   3 -22  -4    0.20    4.20
  -3 -22   4    6.20    2.00
   0   0  -5    0.40    1.20
   0   0   5    0.10    1.20
   0   0   5   -0.20    1.10
   1   0  -5  119.19    5.60
  -1   0  -5  128.59    6.00
   1   0   5  120.99    6.10
  -1   0   5  121.49    6.00
   1   0  -5  125.29    5.60
   1   0   5  123.29    6.30
   2   0   5   19.90    3.50
  -2   0  -5   19.00    2.70
   2   0   5   19.60    3.20
   2   0  -5   18.20    1.80
  -2   0   5   18.60    3.00
  -3   0  -5    8.40    2.10
   3   0  -5    6.20    1.20
   3   0   5    3.70    1.90
  -3   0   5    3.40    1.40
   3   0  -5    7.00    1.50
   3   0   5    7.00    2.30
   3   0  -5    4.90    1.50
   4   0   5   34.60    3.90
   4   0   5   27.30    4.80
   4   0  -5   35.50    3.00
   4   0   5   30.00    2.60
   4   0  -5   32.20    3.00
   5   0  -5   13.40    2.10
   5   0  -5   14.90    2.30
   5   0   5   16.20    3.00
   5   0  -5   16.30    1.90
   5   0   5   14.10    2.40
   5   0   5   14.90    2.90
   6   0  -5  121.49    7.10
   6   0   5  139.79    8.40
   6   0   5  120.09    6.70
   6   0  -5  126.39    6.60
   6   0   5  132.69    8.00
   7   0   5    4.60    2.10
   7   0  -5    3.00    2.40
   7   0   5    8.30    2.90
   8   0  -5   28.00    4.50
   8   0   5   37.70    5.10
   9   0   5    3.30    3.00
   9   0   5    2.20    2.30
   9   0   5    4.00    2.40
   9   0   5    6.90    3.60
   9   0  -5   -0.60    2.50
  10   0   5   31.00    3.50
  10   0   5   28.90    5.20
  11   0   5   -3.70    2.80
  12   0   5   -1.10    2.20
   0  -1   5  194.18    8.90
   0  -1  -5  207.68    8.70
   0  -1  -5  191.98    8.70
   0   1   5  208.78    8.90
   0  -1   5  197.18    9.30
   0   1  -5  203.28    8.90
   1  -1   5  121.29    6.30
  -1   1   5  119.59    5.60
   1   1  -5  119.49    5.80
   1  -1   5  122.79    5.90
   1   1  -5  119.79    5.60
  -1  -1  -5  121.29    5.80
  -1  -1   5  119.39    6.30
   1   1   5  124.49    6.00
   1  -1  -5  113.69    5.30
   1   1   5  124.89    6.20
  -1   1  -5  120.79    6.00
   2   1  -5  180.78    8.10
  -2   1   5  177.78    8.00
  -2  -1  -5  171.68    8.40
   2  -1   5  180.88    8.70
   2  -1   5  182.08    8.50
   2   1  -5  170.28    7.90
   2   1   5  192.48    8.50
   2  -1  -5  176.98    7.50
  -2  -1   5  186.58    8.90
  -2   1  -5  174.08    8.30
   2   1   5  176.28    8.90
   2  -1  -5  161.98    7.40
   3   1  -5   18.30    2.40
  -3  -1  -5   21.00    3.40
   3   1  -5   16.00    2.50
  -3   1   5   13.20    2.50
   3  -1   5   18.20    1.90
   3  -1   5   11.90    2.30
   3  -1   5   14.40    2.50
   3   1   5   16.90    3.50
   3  -1  -5   17.90    2.60
   3  -1  -5   19.00    1.90
   3   1   5   19.30    2.70
   3  -1  -5   17.60    1.60
   4   1  -5   29.20    2.90
   4  -1   5   30.60    2.70
   4   1  -5   30.00    3.10
   4  -1   5   25.00    3.80
   4  -1  -5   35.10    3.30
   4   1   5   25.80    3.90
   4  -1  -5   32.80    2.50
  -4  -1   5   27.40    4.40
   4   1   5   29.40    4.10
   4  -1  -5   28.30    2.20
   4   1   5   26.10    2.40
   5   1  -5  226.58   10.00
   5   1  -5  216.48    9.90
   5  -1   5  199.88   10.30
   5  -1   5  198.28    9.60
   5  -1   5  203.38   10.60
   5   1  -5  195.58    9.70
   5  -1  -5  213.38    9.30
   5  -1  -5  228.28   10.00
   5   1   5  207.48    9.60
   5   1   5  207.08   10.90
   5   1   5  204.98   11.00
   6   1  -5   20.70    3.50
   6   1  -5   20.90    3.20
   6  -1   5   23.10    3.10
   6  -1   5   28.70    4.60
   6  -1   5   27.10    4.60
   6   1  -5   20.30    3.20
   6  -1  -5   19.00    2.30
   6   1   5   23.00    3.00
   6   1   5   34.70    4.70
   6   1   5   27.00    4.20
   6  -1  -5   23.60    3.30
   7  -1   5   41.60    4.00
   7  -1   5   47.90    5.30
   7   1  -5   31.80    4.30
   7  -1  -5   34.30    4.40
   7   1   5   52.69    5.60
   8   1  -5   79.39    5.80
   8  -1   5   71.69    6.00
   8  -1   5   76.79    5.80
   8  -1  -5   74.99    6.00
   8   1   5   82.29    6.70
   9   1  -5   25.80    5.20
   9   1  -5   31.50    4.80
   9  -1   5   48.90    6.00
   9  -1   5   45.90    4.30
   9   1   5   48.40    6.70
   9   1   5   44.50    5.80
   9   1   5   56.69    5.40
   9   1   5   41.50    4.70
   9  -1  -5   27.90    4.30
  10   1  -5    1.00    4.60
  10  -1   5   14.20    1.90
  10  -1   5   -3.40    3.70
  10  -1   5   16.30    3.80
  10   1   5   14.90    2.60
  10   1   5   16.70    3.70
  10   1   5   -2.90    3.40
  11  -1   5   -2.30    3.10
  11   1  -5    2.00    3.30
  11  -1   5   16.60    4.60
  11   1   5   -1.70    2.90
  12  -1   5   -1.10    2.20
  12   1   5   -0.20    2.40
   0  -2   5  166.58    8.60
   0  -2  -5  168.68    7.90
   0   2  -5  173.98    8.20
   0  -2  -5  178.08    7.80
   0   2   5  188.38    8.10
   0  -2   5  174.18    8.20
  -1  -2  -5   44.80    3.40
   1  -2   5   44.20    3.80
   1   2  -5   43.60    3.40
  -1   2   5   44.10    2.70
   1  -2   5   47.20    3.60
   1   2   5   36.50    3.40
  -1   2  -5   45.40    3.20
  -1  -2   5   48.30    3.40
   1  -2  -5   40.90    2.30
   1   2   5   48.00    3.30
   1  -2  -5   48.00    2.30
  -1  -2   5   45.10    4.20
   2  -2   5   45.30    4.00
   2   2  -5   42.50    3.60
  -2  -2  -5   42.70    3.50
   2   2  -5   43.00    2.80
   2  -2   5   43.60    3.70
   2   2  -5   37.50    3.10
  -2   2  -5   43.70    3.50
  -2  -2   5   35.70    3.50
  -2  -2   5   44.50    4.60
   2   2   5   40.60    4.20
   2   2   5   42.80    3.60
   3  -2   5   -1.20    1.90
   3   2  -5   -1.70    1.30
   3  -2   5    0.70    1.80
   3  -2   5    1.60    1.40
  -3  -2  -5    0.80    1.90
   3   2  -5    1.30    1.90
   3   2   5    0.00    1.70
   3   2   5    1.60    2.20
   3  -2  -5    1.10    1.60
   4   2  -5   32.50    2.90
   4   2  -5   35.40    3.80
   4  -2   5   31.10    2.80
   4  -2   5   32.60    3.70
   4  -2  -5   31.70    3.00
  -4  -2   5   17.70    3.20
   4   2   5   25.10    4.70
   4   2   5   26.80    2.40
   4   2   5   37.50    4.30
   5   2  -5   62.59    4.50
   5   2  -5   62.39    4.90
   5   2  -5   63.59    4.60
   5  -2   5   68.49    5.10
   5  -2   5   62.39    4.10
   5  -2  -5   69.99    4.70
   5   2   5   75.79    6.20
   5   2   5   51.79    3.80
   5   2   5   59.79    6.30
   5  -2  -5   61.79    3.50
   6  -2   5    5.40    1.90
   6   2  -5    5.30    2.10
   6   2  -5    5.00    2.10
   6  -2   5    4.30    2.50
   6   2   5    7.50    3.80
   6  -2  -5    3.30    2.40
   7   2  -5   28.20    3.70
   7   2  -5   26.20    4.10
   7  -2   5   35.70    4.80
   7  -2   5   30.60    3.70
   7   2   5   31.30    5.30
   7  -2  -5   32.10    4.20
   8   2  -5   22.10    3.60
   8  -2   5   25.00    4.20
   8  -2   5   25.30    4.00
   8   2   5   32.70    5.40
   8  -2  -5   30.00    4.10
   9  -2   5   23.20    3.60
   9   2  -5   24.80    4.80
   9   2  -5   21.40    2.70
   9  -2   5   28.70    5.30
   9   2   5   34.30    4.60
   9  -2  -5   28.10    4.70
   9   2   5   25.20    4.00
   9   2   5   26.20    4.40
   9   2   5   26.10    4.30
  10   2  -5   23.10    5.50
  10  -2   5   23.00    4.30
  10   2   5   23.20    5.80
  10   2   5   15.80    2.90
  11  -2   5   19.40    3.70
  11   2  -5   33.50    6.30
  11   2   5   29.30    2.50
  12   2  -5    0.00    2.40
  12  -2   5   -0.90    2.40
  12   2   5   -0.40    2.20
   0  -3   5   34.00    3.20
   0  -3  -5   37.70    2.80
   0  -3   5   38.30    4.50
   0  -3  -5   35.90    2.90
   0   3  -5   35.60    3.10
   0   3  -5   34.90    3.10
   1   3  -5   93.99    5.30
  -1   3   5  107.09    4.50
   1  -3   5   95.39    5.20
  -1  -3  -5   95.79    5.00
   1  -3   5  104.29    6.10
  -1   3  -5   84.49    5.00
  -1  -3   5   82.39    6.20
   1  -3  -5   85.69    4.10
  -1  -3   5   81.49    5.20
   1  -3  -5   81.99    4.10
   1   3   5   84.79    5.10
   2   3  -5  441.46   19.00
  -2  -3  -5  431.06   19.40
   2  -3   5  455.35   19.40
   2  -3   5  484.65   20.10
   2   3  -5  469.65   19.50
   2  -3   5  458.45   18.90
  -2  -3   5  479.15   20.50
  -2   3  -5  445.06   19.40
   2   3   5  440.86   19.60
  -2  -3   5  434.26   19.50
   3  -3   5   83.99    4.30
   3  -3   5   83.29    5.20
  -3  -3  -5   79.99    5.50
   3   3  -5   84.29    4.50
   3  -3   5   80.99    6.70
   3   3  -5   82.29    5.50
   3   3   5   84.39    5.80
   3  -3  -5   82.59    4.60
   3   3   5   74.39    5.60
   4   3  -5    0.70    1.50
   4   3  -5    1.20    2.20
   4  -3   5    0.00    1.90
   4  -3   5    0.20    1.70
   4   3  -5   -0.50    1.70
   4  -3   5   -0.60    1.50
   4   3   5    1.60    2.10
   4   3   5    1.70    2.60
   4  -3  -5   -0.40    1.80
  -4  -3   5   -1.50    2.60
   5  -3   5    8.00    2.00
   5   3  -5    9.60    2.30
   5  -3   5    6.30    2.30
   5  -3   5   11.30    2.50
   5   3  -5    6.00    2.50
   5   3  -5    9.40    2.30
   5  -3  -5    4.40    2.00
   5   3   5    6.30    3.50
   5   3   5    8.20    2.80
  -5  -3   5    7.60    3.10
   6  -3   5   30.10    3.60
   6  -3   5   35.60    4.40
   6   3  -5   38.40    4.00
   6   3  -5   33.80    4.30
   6  -3   5   34.90    4.40
   6   3  -5   35.80    4.20
   6   3   5   31.70    5.10
   6  -3  -5   29.50    3.90
   7   3  -5   71.89    5.30
   7   3  -5   72.09    5.60
   7  -3   5   70.89    5.20
   7  -3   5   78.39    5.70
   7   3   5   68.29    6.80
   7  -3  -5   76.29    5.70
   8  -3   5   23.40    3.40
   8   3  -5   20.50    3.50
   8  -3   5   27.20    4.40
   8   3   5   20.90    4.00
   8  -3  -5   20.80    3.80
   9  -3   5   15.80    7.40
   9   3  -5   13.60    4.40
   9  -3   5    2.30    3.60
   9  -3   5   12.00    2.10
   9  -3   5    9.90    3.90
   9   3  -5    7.00    1.90
   9   3  -5    0.40    5.50
   9   3   5    8.10    3.80
   9   3   5   13.10    3.50
   9   3   5   -1.20    2.70
   9   3   5    8.00    3.50
   9   3   5    6.90    3.00
  10  -3   5    5.00    3.40
  10   3  -5    2.80    4.50
  10   3  -5    0.60    4.60
  10  -3   5    2.20    3.90
  10   3   5   -1.80    2.90
  10   3   5    6.10    3.20
  10   3   5    8.40    2.60
  11   3  -5   17.80    5.30
  11  -3   5   13.60    3.30
  11   3   5   15.70    2.80
  11   3   5   22.10    5.00
  12   3  -5    1.00    2.40
  12  -3   5   -1.10    2.30
  12   3   5   -0.30    2.20
   0  -4  -5  603.94   27.00
   0  -4   5  685.13   27.40
   0   4  -5  647.04   27.30
   0   4  -5  652.13   27.40
   0  -4   5  620.44   28.00
   0  -4  -5  695.13   26.90
   1   4  -5  213.78    9.60
   1  -4   5  233.68   10.30
   1   4  -5  215.18   10.40
   1  -4   5  257.97   11.20
  -1  -4  -5  236.08   10.20
   1  -4  -5  221.38    9.40
  -1  -4   5  213.38   11.20
  -1  -4   5  207.68   10.30
   1  -4  -5  207.98    9.50
  -1   4  -5  224.18   10.30
   1   4   5  219.98   10.30
   2   4  -5   19.90    2.20
   2  -4   5   13.00    2.50
   2   4  -5   21.70    3.50
   2  -4   5   15.90    2.40
  -2  -4  -5   21.80    3.50
   2  -4   5   20.90    2.20
  -2  -4   5   17.40    3.20
  -2  -4   5   18.80    3.40
   2   4   5   15.90    2.70
   3   4  -5   52.59    3.70
   3  -4   5   56.79    3.50
   3  -4   5   58.59    4.30
   3   4  -5   54.49    4.80
  -3  -4  -5   50.89    4.70
   3  -4  -5   53.69    3.60
   3   4   5   54.79    5.20
   4   4  -5  104.99    5.60
   4  -4   5  104.09    5.50
   4  -4   5   92.09    6.00
   4   4  -5  103.69    6.60
   4  -4   5  107.09    6.20
   4   4  -5  103.89    6.30
   4  -4  -5  116.09    5.80
  -4  -4   5  104.89    9.90
   4   4   5   99.49    7.40
   4   4   5  108.99    7.80
   5  -4   5   39.70    4.30
   5   4  -5   35.20    4.60
   5   4  -5   40.30    4.20
   5  -4   5   39.20    3.30
   5   4  -5   38.90    3.70
   5  -4   5   39.00    4.30
   5   4   5   44.10    5.50
  -5  -4   5   35.60    7.50
   5   4   5   35.20    6.30
   5  -4  -5   42.80    3.70
   6   4  -5    7.20    2.80
   6  -4   5    8.00    2.40
   6   4  -5   11.10    2.60
   6   4  -5    7.20    2.20
   6  -4   5    7.70    2.40
   6  -4   5    7.00    2.00
   6   4   5   10.30    3.20
   6  -4  -5    6.80    2.30
   6   4   5   12.10    3.40
   7  -4   5    0.90    2.00
   7  -4   5    2.30    2.20
   7   4  -5    0.40    2.40
   7   4  -5    4.60    2.50
   7  -4  -5    3.60    2.50
   7   4   5    2.60    3.10
   8   4  -5   44.80    7.40
   8   4  -5   43.80    4.80
   8   4  -5   40.90    4.80
   8  -4   5   41.80    4.70
   8   4   5   39.10    6.20
   8  -4  -5   43.50    5.00
   9  -4   5    2.20    3.50
   9  -4   5    3.40    6.90
   9   4  -5   -1.60    1.90
   9   4  -5    2.30    4.00
   9   4  -5    0.40    4.70
   9  -4   5    2.70    1.60
   9   4   5    0.80    3.40
   9   4   5    0.20    2.80
   9   4   5    2.10    2.80
   9   4   5   -0.10    3.20
  10   4  -5    0.90    4.00
  10  -4   5   20.20    4.10
  10   4  -5    9.40    4.70
  10  -4   5    3.20    3.80
  10   4   5   10.10    2.70
  10   4   5   11.00    3.50
  10   4   5   13.20    3.20
  11   4  -5   -0.80    2.80
  11  -4   5   -0.50    2.80
  11  -4   5    5.50    2.80
  11   4  -5   -3.50    4.30
  11   4   5   14.50    4.70
  11   4   5    5.60    2.00
  11   4   5   -2.10    2.40
  12   4  -5   -9.20    3.40
  12   4  -5    1.10    2.30
  12  -4   5    0.00    2.40
  12   4   5   -5.00    3.50
  12   4   5    0.40    1.90
   0  -5  -5  394.16   15.80
   0  -5   5  357.16   17.10
   0  -5   5  388.16   16.40
   0  -5  -5  335.97   15.90
   0   5  -5  369.86   16.30
   1   5  -5   17.30    2.10
   1   5  -5   19.60    2.90
   1  -5   5   24.10    4.80
  -1  -5  -5   17.70    2.50
   1  -5   5   21.10    3.10
   1  -5  -5   16.40    2.10
  -1  -5   5   13.60    2.90
  -1   5  -5   14.40    2.40
  -1  -5   5   18.30    2.90
   2  -5   5   12.30    2.70
   2  -5   5   15.00    2.50
  -2  -5  -5   14.70    2.70
   2   5  -5   11.30    2.60
   2   5  -5   13.80    2.10
  -2  -5   5   11.60    3.10
   2  -5  -5   16.00    2.10
   2   5   5   15.70    3.00
  -2  -5   5   14.30    2.80
   3   5  -5    7.30    1.80
   3  -5   5    9.50    1.80
   3  -5   5    6.00    2.20
  -3  -5  -5    8.50    2.70
   3   5  -5    6.80    2.70
   3   5   5    8.80    3.50
   3  -5  -5    7.30    1.80
   4   5  -5  159.68    8.60
   4  -5   5  153.28    7.40
   4   5  -5  142.39    8.30
   4   5  -5  147.79    7.40
   4  -5   5  149.88    7.90
   4  -5   5  137.89    7.70
  -4  -5   5  143.69   11.10
   4   5   5  138.79    8.90
   4  -5  -5  156.78    7.50
   5   5  -5  106.59    7.30
   5   5  -5  103.59    6.90
   5  -5   5  113.09    6.80
   5  -5   5  113.59    6.60
   5  -5   5  116.79    6.20
   5   5  -5  112.49    6.30
   5   5   5  107.79    8.00
   5  -5  -5  124.29    6.50
  -5  -5   5  109.19   10.50
   5   5   5  105.99    7.80
   6  -5   5   30.90    4.10
   6   5  -5   35.40    4.80
   6   5  -5   33.80    3.70
   6   5  -5   42.10    5.10
   6  -5   5   26.40    3.80
   6  -5   5   34.80    3.90
   6  -5  -5   44.00    4.30
   6   5   5   34.10    5.70
   7  -5   5   49.40    4.70
   7  -5   5   48.00    4.60
   7   5  -5   46.90    5.70
   7   5  -5   54.79    4.90
   7  -5  -5   49.60    5.00
   7   5   5   49.50    6.50
   8   5  -5   22.80    4.90
   8   5  -5   32.70    5.00
   8   5  -5   27.30    4.50
   8  -5   5   34.00    4.50
   8  -5   5   31.60    5.20
   8   5   5   28.20    5.20
   8  -5  -5   30.60    4.70
   9  -5   5   30.30    5.30
   9  -5   5   21.80    8.90
   9   5  -5   26.20    3.80
   9   5  -5   38.60    7.60
   9   5   5   25.70    5.20
   9   5   5   22.60    4.50
   9   5   5   20.50    4.60
  10   5  -5   17.40    5.00
  10  -5   5   21.00    4.40
  10   5  -5   22.40    2.80
  10   5  -5   16.20    2.50
  10   5   5   22.00    4.30
  10   5   5   16.70    3.80
  11   5  -5   -1.20    2.70
  11   5  -5    1.90    4.10
  11  -5   5    6.00    3.00
  11  -5   5   -0.20    2.90
  11   5   5   10.40    4.50
  11   5   5    4.20    5.00
  11   5   5    6.40    2.10
  12   5  -5    9.30    3.70
  12   5  -5   -0.80    2.00
  12   5   5    2.90    3.60
  12   5   5   -0.80    1.40
   0   6  -5    0.30    2.10
   0  -6   5    1.70    2.40
   0  -6  -5    1.60    1.70
   0  -6   5    2.10    2.20
   1   6  -5   84.99    6.00
   1   6  -5   84.19    4.80
   1  -6   5   89.69    6.90
   1  -6   5   89.59    5.80
  -1  -6  -5   85.49    5.40
   1  -6  -5   95.69    4.70
  -1  -6   5   83.79    7.50
  -1  -6   5  101.89    6.20
   2   6  -5  101.79    5.30
   2   6  -5  105.09    6.70
   2  -6   5  105.29    6.10
  -2  -6  -5  113.59    6.50
   2  -6  -5  100.59    4.70
   2  -6  -5  100.89    4.60
   2  -6  -5   98.59    5.10
  -2  -6   5  116.49    8.10
   3  -6   5   25.00    2.70
  -3  -6  -5   29.70    4.00
   3  -6   5   22.20    3.40
   3  -6   5   24.10    3.70
   3   6  -5   24.80    3.00
   3   6  -5   31.30    4.50
   3  -6  -5   26.70    2.70
   4   6  -5   57.29    5.50
   4   6  -5   50.89    5.40
   4  -6   5   56.19    4.60
   4  -6   5   50.69    3.80
   4   6  -5   52.39    4.00
   4  -6   5   57.99    4.70
   4  -6  -5   57.89    3.80
  -4  -6   5   49.30    8.60
   4   6   5   50.59    6.00
   5  -6   5   20.30    3.60
   5  -6   5   25.30    3.70
   5   6  -5   24.80    3.30
   5  -6   5   30.20    3.10
   5   6  -5   14.30    3.10
   5   6  -5   28.40    4.70
   5   6   5   20.20    3.70
  -5  -6   5   21.20    5.80
   5  -6  -5   26.00    3.10
   5   6   5   23.30    4.00
   6   6  -5   34.80    5.90
   6   6  -5   36.10    5.20
   6  -6   5   39.20    4.10
   6  -6   5   36.90    4.00
   6   6  -5   40.10    4.30
   6   6   5   43.70    6.00
   6  -6  -5   34.50    3.90
   7   6  -5    8.60    2.70
   7   6  -5    6.20    3.00
   7  -6   5    5.60    2.80
   7  -6  -5    7.60    2.80
   7   6   5    1.40    3.50
   8  -6   5   46.40    6.50
   8  -6   5   51.89    5.00
   8   6  -5   46.70    6.40
   8   6  -5   48.80    5.20
   8   6  -5   53.09    5.80
   8   6  -5   42.50    7.60
   8   6  -5   41.20    5.00
   8   6   5   56.49    7.30
   8   6   5   55.49    7.80
   8  -6  -5   52.89    5.40
   9   6  -5   42.80    4.40
   9   6  -5   36.20    5.20
   9   6  -5   41.90    5.50
   9  -6   5   43.50   12.50
   9   6  -5   51.89    7.80
   9  -6   5   38.50    6.10
   9   6   5   60.69    7.10
   9   6   5   40.00    5.70
   9   6   5   39.30    6.80
  10   6  -5   -1.90    3.20
  10   6  -5    2.90    1.90
  10   6  -5    2.20    4.40
  10  -6   5    2.00    3.30
  10  -6   5   18.30    5.00
  10   6   5    3.60    3.20
  10   6   5   -1.20    2.50
  10   6   5    3.80    2.60
  11   6  -5    1.60    2.60
  11   6  -5    7.80    4.40
  11  -6   5    8.00    3.10
  11   6   5    9.50    4.40
  11   6   5    8.40    2.30
  11   6   5    8.20    3.00
  12   6  -5    7.60    3.50
  12   6  -5    0.80    2.00
  12   6   5    7.00    3.90
   0  -7   5   10.00    2.80
   0  -7   5    6.80    2.70
   0  -7  -5   10.10    2.10
  -1  -7  -5  146.89    8.00
   1  -7   5  159.28    8.50
   1   7  -5  164.18    7.50
   1  -7   5  159.48    9.40
  -1  -7   5  147.89    9.80
  -1  -7   5  152.58    8.40
   1  -7  -5  161.38    7.40
   2   7  -5   68.49    4.10
   2  -7   5   77.19    5.00
   2   7  -5   64.09    5.40
   2  -7   5   72.19    4.80
  -2  -7  -5   67.39    5.20
   2  -7  -5   55.49    3.50
  -2  -7   5   65.89    7.40
   2  -7  -5   63.79    3.50
   2  -7  -5   62.59    3.70
   3  -7   5   62.19    5.10
  -3  -7  -5   71.69    5.90
   3   7  -5   69.59    4.60
   3   7  -5   75.29    6.10
   3  -7   5   71.19    5.20
   3   7  -5   71.29    6.10
  -3  -7   5   82.49    3.40
   3  -7  -5   67.79    4.30
   4  -7   5   27.00    3.80
   4   7  -5   19.70    3.50
   4   7  -5   27.30    3.20
   4  -7   5   25.20    3.20
   4  -7   5   22.70    2.90
   4   7  -5   26.60    3.80
  -4  -7  -5   19.30    2.80
  -4  -7  -5   20.90    3.50
   4   7   5   22.50    4.00
   4  -7  -5   20.10    3.00
  -4  -7   5   24.00    6.80
   5  -7   5   16.50    2.70
   5   7  -5   22.10    2.90
   5   7  -5   12.10    3.20
   5  -7   5   15.90    2.70
   5  -7   5   17.80    2.70
   5   7  -5   20.90    3.60
   5   7   5   28.80    4.50
   5  -7  -5   19.20    2.80
   5   7   5   14.70    3.30
  -5  -7   5   18.50    6.10
   6   7  -5   24.90    4.00
   6  -7   5   18.80    2.60
   6  -7   5   17.00    2.90
   6   7  -5   20.90    3.20
   6   7   5   18.60    4.20
   6  -7  -5   18.50    3.20
   7   7  -5    1.20    2.50
   7   7  -5    2.70    3.00
   7  -7   5    4.30    2.30
   7  -7  -5    1.30    2.50
   7   7   5    2.40    3.80
   8  -7   5   24.30    3.70
   8   7  -5   16.20    3.60
   8   7  -5   19.00    4.70
   8   7  -5   25.60    4.20
   8  -7   5   16.40    9.50
   8  -7   5   19.90    4.70
   8   7  -5   20.90    3.60
   8   7   5   22.50    5.00
   8   7   5   17.50    4.30
   8  -7  -5   15.30    3.20
   9  -7   5   11.10   12.00
   9   7  -5   11.20    2.70
   9   7  -5   10.00    3.10
   9   7  -5   15.40    4.50
   9   7  -5   10.20    2.90
   9  -7   5    9.90    4.30
   9   7   5   15.10    4.60
   9   7   5   16.00    4.00
   9   7   5   16.00    3.60
  10  -7   5   -0.30    3.40
  10   7  -5    1.00    3.10
  10   7  -5    3.70    4.30
  10   7  -5    5.10    2.20
  10   7   5    1.90    3.30
  10   7   5   13.20    5.00
  10   7   5    5.10    2.80
  10   7   5   -1.80    2.50
  11  -7   5    1.90    2.70
  11   7  -5   -2.10    2.10
  11   7  -5    0.00    3.80
  11   7   5    3.60    4.00
  11   7   5   -0.20    1.30
  11   7   5    3.70    2.10
  11   7   5    1.70    2.80
   0  -8  -5    1.50    1.70
   0  -8   5   -0.20    2.30
   0  -8   5   -2.30    2.50
   0  -8  -5    1.80    1.80
   1   8  -5  307.17   13.70
  -1  -8  -5  301.87   14.10
   1  -8   5  325.37   14.70
   1  -8   5  296.97   14.40
  -1  -8  -5  302.77   14.40
   1  -8  -5  323.77   13.80
  -1  -8   5  325.47   14.90
  -1  -8   5  320.27   16.70
  -2  -8  -5   13.90    1.90
   2  -8   5   12.60    2.60
   2   8  -5   12.20    2.00
   2  -8   5   18.00    2.70
  -2  -8  -5   12.10    2.90
  -2  -8  -5   10.30    2.60
   2  -8  -5   18.00    2.20
  -3  -8  -5   96.49    8.20
  -3  -8  -5  125.89    7.80
  -3  -8  -5  131.09    6.20
   3  -8   5  135.89    7.30
   3   8  -5  123.19    8.00
   3  -8   5  128.79    7.10
   3   8  -5  118.29    6.40
   3  -8  -5  116.09    6.20
  -4  -8  -5   18.80    2.80
   4   8  -5   16.10    3.40
   4  -8   5   22.90    3.60
   4   8  -5   19.60    3.10
  -4  -8  -5   23.20    3.90
   4  -8   5   15.60    2.80
   4  -8  -5   21.00    3.00
  -4  -8   5   13.30    6.30
  -5  -8  -5   19.90    3.10
   5  -8   5   24.50    3.60
   5  -8   5   31.20    3.80
   5   8  -5   25.90    4.30
   5   8  -5   25.70    3.40
   5  -8   5   24.70    3.80
  -5  -8   5   21.90    7.50
   5  -8  -5   19.00    3.30
   5   8   5   26.10    4.80
   6   8  -5    4.90    2.40
   6  -8   5    6.60    2.30
   6   8  -5    6.30    3.20
   6  -8  -5    6.10    2.40
   6   8   5    7.50    3.70
   7   8  -5   41.50    5.80
   7  -8   5   44.90    4.90
   7   8  -5   47.40    6.70
   7   8  -5   35.40    7.10
   7  -8  -5   50.59    4.90
   7  -8  -5   49.40    9.10
   7   8   5   48.20    7.90
   8   8  -5   24.20    4.10
   8  -8   5   28.30    5.10
   8   8  -5   24.30    5.10
   8   8  -5   23.40    3.80
   8   8  -5   30.90    4.50
   8   8   5   20.70    4.40
   8   8   5   36.60    6.10
   9  -8   5    5.60    3.90
   9   8  -5    8.60    3.10
   9   8  -5   -0.60    3.10
   9   8  -5    5.70    2.50
   9   8  -5    8.40    4.10
   9   8  -5    4.90    2.80
   9   8   5    0.60    2.80
   9   8   5   18.50    4.70
   9   8   5    9.50    3.30
   9   8   5    9.30    3.60
  10   8  -5    4.10    4.40
  10  -8   5    9.70    3.70
  10   8  -5   -0.90    2.50
  10   8  -5    6.30    2.30
  10   8   5    4.30    3.40
  10   8   5    3.60    2.70
  10   8   5   -0.40    2.30
  10   8   5    8.90    4.70
  11   8  -5    9.60    3.70
  11   8  -5    0.30    2.30
  11  -8   5    5.30    2.70
  11   8   5    4.30    2.80
  11   8   5    5.90    2.10
  11   8   5    4.60    3.80
   0  -9  -5    6.20    1.60
   0  -9   5    2.40    2.30
   0  -9   5    3.40    2.70
   0  -9  -5    6.30    2.30
   0  -9  -5    3.50    1.80
  -1  -9  -5   99.59    6.40
   1   9  -5   94.79    5.50
   1  -9   5   98.29    6.70
  -1  -9  -5  108.79    5.30
   1  -9   5  102.99    6.70
  -1  -9  -5   96.09    6.20
   1  -9  -5   95.89    5.10
   1  -9  -5   97.29    5.60
  -1  -9   5  109.29    7.40
   1  -9  -5  116.59    5.80
  -1  -9   5   97.99    7.00
  -1  -9   5  104.19    9.00
  -2  -9  -5   58.19    5.40
  -2  -9  -5   64.79    5.60
  -2  -9  -5   63.39    4.00
   2   9  -5   55.49    4.10
   2  -9   5   61.29    5.00
   2  -9   5   64.79    5.20
  -2  -9   5   65.09    6.00
   2  -9  -5   61.99    3.70
   2  -9  -5   57.99    3.80
   3  -9   5    3.50    2.10
  -3  -9  -5    1.20    1.80
  -3  -9  -5   -1.50    2.50
   3   9  -5    2.80    3.00
   3   9  -5    3.00    1.80
   3  -9   5   -0.20    2.20
   3  -9  -5    3.30    1.80
   4  -9   5   59.59    4.80
   4   9  -5   64.19    4.70
   4   9  -5   62.39    6.40
   4  -9   5   62.69    5.00
  -4  -9  -5   57.99    4.30
  -4  -9  -5   74.89    6.50
   4  -9  -5   55.59    4.30
  -4  -9   5   76.09   10.90
   5  -9   5    2.80    2.10
   5   9  -5    4.90    2.20
  -5  -9  -5    1.40    1.90
   5   9  -5    4.50    3.00
   5   9   5   -1.30    3.70
   5  -9  -5    3.30    2.20
  -5  -9   5   -1.80    7.10
   6   9  -5   10.60    4.00
   6   9  -5   11.10    2.80
   6  -9  -5   11.20    2.70
   6   9   5   14.70    4.60
   7   9  -5   28.60    6.00
   7  -9   5   34.20    5.70
   7   9  -5   38.10    5.40
   7   9  -5   38.30    5.80
   7  -9  -5   37.00    7.40
   7  -9  -5   36.60    5.80
   7   9   5   23.00    5.50
   7  -9  -5   44.80    4.70
   7   9   5   31.60    5.50
   8   9  -5    0.00    2.80
   8  -9   5    9.00    4.40
   8   9  -5    6.10    4.30
   8   9  -5    9.40    3.30
   8   9  -5    7.60    3.80
   8   9  -5   11.10    3.60
   8   9   5    5.00    4.40
   8   9   5    0.60    3.00
   8   9   5   10.30    3.60
   9   9  -5   25.80    3.90
   9   9  -5   31.10    5.60
   9  -9   5   42.00    6.40
   9   9  -5   33.40    4.60
   9   9  -5   31.10    5.70
   9   9   5   28.50    5.20
   9   9   5   26.00    4.90
   9   9   5   43.20    6.80
  10   9  -5    6.70    2.20
  10   9  -5    3.60    2.60
  10   9  -5    3.20    4.20
  10   9  -5   -0.10    2.70
  10  -9   5   10.90    3.70
  10   9  -5    6.10    2.30
  10   9   5    7.40    4.30
  10   9   5    6.00    2.60
  10   9   5    8.90    3.40
  11   9  -5   10.90    3.80
  11  -9   5    5.80    2.70
  11   9   5   11.80    2.90
  11   9   5    4.70    3.50
  11   9   5    8.10    2.20
   0 -10   5  374.16   17.40
   0 -10  -5  362.36   16.60
   0 -10  -5  353.46   16.20
   0 -10  -5  366.16   15.70
   0 -10   5  381.86   17.20
   1  10  -5   53.19    3.80
  -1 -10  -5   43.90    4.70
  -1 -10  -5   51.09    3.60
   1 -10   5   51.09    5.20
   1 -10   5   44.00    5.00
  -1 -10  -5   48.50    4.60
  -1 -10   5   52.69    5.50
   1 -10  -5   45.10    3.90
   1 -10  -5   46.20    3.40
  -1 -10   5   44.50    5.80
   1 -10  -5   54.19    4.10
  -2 -10  -5  289.57   13.30
   2  10  -5  310.07   13.70
   2 -10   5  326.67   14.70
   2 -10   5  318.37   14.40
  -2 -10  -5  303.47   14.60
  -2 -10  -5  291.17   14.80
   2 -10  -5  306.97   13.20
  -2 -10   5  277.17   12.50
  -2 -10   5  331.77   15.10
   2 -10  -5  299.67   13.30
   3  10  -5   18.50    3.70
   3  10  -5   17.20    3.00
  -3 -10  -5   21.10    2.90
  -3 -10  -5   15.20    3.20
   3 -10   5   15.00    3.00
   3 -10   5   13.50    2.90
  -3 -10   5   14.00    8.60
  -4 -10  -5   67.79    6.80
   4 -10   5   63.19    5.10
  -4 -10  -5   55.29    4.30
   4  10  -5   70.59    4.90
   4  10  -5   72.39    7.20
  -4 -10   5   72.69   11.20
   4 -10  -5   63.79    5.80
   5  10  -5   56.69    4.70
   5  10  -5   56.29    7.20
  -5 -10  -5   47.00    7.80
  -5 -10  -5   49.80    4.00
   5 -10   5   58.99    4.70
  -5 -10   5   50.69   11.20
   5 -10  -5   50.79    4.50
   6  10  -5   85.79    8.40
   6 -10  -5   82.29    9.50
   6 -10  -5   72.09    5.60
   6  10   5   72.19    9.30
   7  10  -5   12.10    4.60
   7 -10   5   17.10    5.00
   7  10  -5   13.70    4.50
   7  10  -5   10.30    3.60
   7 -10  -5   12.80    3.10
   7 -10  -5   14.50    4.40
   7  10   5    5.90    4.80
   7  10   5    8.50    3.60
   7 -10  -5    1.10    5.20
   8  10  -5   12.80    3.30
   8  10  -5   10.00    4.10
   8 -10   5   14.20    4.70
   8  10  -5   18.10    4.90
   8  10  -5   13.90    3.60
   8  10  -5   19.00    4.50
   8 -10  -5   16.90    4.80
   8  10   5   11.50    3.90
   8  10   5   20.30    5.50
   9 -10   5   -0.60    3.60
   9  10  -5    1.90    2.50
   9  10  -5    3.20    3.00
   9  10  -5    0.70    2.70
   9  10  -5   -1.50    4.30
   9  10   5    1.00    2.70
   9  10   5    1.20    3.50
   9  10   5    3.50    5.20
  10  10  -5   -0.10    2.30
  10  10  -5    2.10    3.90
  10  10  -5    4.40    2.80
  10  10  -5    6.10    2.30
  10  10  -5    7.30    2.30
  10 -10   5    8.20    3.50
  10  10   5    4.40    2.60
  10  10   5    6.00    3.80
  10  10   5    4.90    3.40
  11  10  -5    0.30    1.80
  11 -10   5    2.50    2.30
  11  10  -5    5.20    3.20
  11  10   5    2.60    2.50
  11  10   5    0.40    1.50
  11  10   5    0.70    1.90
  11  10   5    1.30    2.50
   0 -11   5   23.80    3.90
   0 -11  -5   21.30    3.00
   0 -11   5   28.80    3.00
   0 -11  -5   19.00    3.10
   0 -11  -5   25.40    2.90
   0 -11   5   26.10    3.90
  -1 -11  -5   73.89    5.40
  -1 -11  -5   77.69    4.50
   1  11  -5   74.89    4.70
   1 -11   5   82.09    6.40
   1 -11   5   80.79    6.10
  -1 -11  -5   64.79    6.00
   1 -11  -5   65.19    4.30
   1 -11  -5   67.99    4.90
  -1 -11   5   79.39    6.70
   1 -11  -5   65.69    4.80
   3  11  -5    0.40    1.80
   3 -11   5   -2.20    2.20
  -3 -11  -5    0.40    1.90
  -3 -11  -5    4.90    3.20
  -3 -11   5  -18.20    7.80
  -3 -11   5    7.40    3.60
  -4 -11  -5    7.40    3.50
   4  11  -5    5.50    3.80
   4  11  -5    8.30    2.50
   4 -11   5    6.70    2.40
  -4 -11  -5    5.20    2.10
  -4 -11   5    4.90    7.20
   5  11  -5    8.30    4.00
  -5 -11  -5    3.70    3.70
  -5 -11  -5   10.40    2.30
  -5 -11   5   -1.90    7.60
   6 -11   5   22.90    5.00
   6  11  -5   12.20    4.80
  -6 -11  -5   11.40    2.60
   6  11  -5   14.70    4.90
   6 -11  -5   18.60    6.10
   6 -11  -5   14.00    3.00
   6 -11  -5   13.80    4.70
   7  11  -5   16.00    4.60
   7 -11   5    3.80    4.40
   7  11  -5   -0.40    3.10
   7  11  -5    9.30    3.50
   7  11   5    6.50    3.70
   7 -11  -5    3.50    4.00
   7  11   5    8.70    5.20
   7 -11  -5    8.60    5.80
   8 -11   5   15.40    4.90
   8  11  -5   17.10    5.10
   8  11  -5   25.00    4.90
   8  11  -5   19.90    4.40
   8  11  -5   19.00    3.80
   8  11  -5   23.10    4.70
   8  11   5    9.30    4.90
   8 -11  -5   18.50    4.70
   8  11   5   17.40    4.20
   9  11  -5   19.50    3.80
   9  11  -5   14.00    4.90
   9 -11   5   12.60    4.10
   9  11  -5   15.80    3.10
   9  11   5   19.80    4.80
   9  11   5   11.80    4.00
  10  11  -5   12.40    4.20
  10  11  -5   18.10    3.20
  10 -11   5   12.50    3.40
  10  11  -5   15.30    2.70
  10  11  -5   17.40    2.60
  10  11   5    5.10    3.00
  10  11   5   12.20    2.90
  10  11   5   16.60    3.70
   0 -12  -5   34.60    3.30
   0 -12   5   38.50    3.20
   0 -12   5   33.30    5.10
   0 -12  -5   30.70    4.40
   0 -12   5   31.20    5.20
   0 -12  -5   29.50    4.40
  -1 -12  -5    5.00    2.50
   1  12  -5    5.50    2.00
  -1 -12  -5    9.00    2.20
   1 -12   5    7.00    3.00
  -1 -12  -5    9.50    2.90
   1 -12   5    3.70    2.80
  -1 -12   5    1.60    3.00
   1 -12  -5    6.30    1.90
   1 -12  -5    2.10    1.90
  -1 -12   5    7.10    2.10
  -2 -12  -5   81.09    7.20
   2  12  -5   81.89    5.50
  -2 -12  -5   72.79    6.90
  -2 -12  -5   91.19    5.30
   2 -12   5  101.69    6.80
   2 -12  -5   85.89    5.10
  -2 -12   5  100.19    8.10
  -3 -12  -5    8.50    3.40
  -3 -12  -5    7.90    2.40
   3 -12   5    2.70    2.60
  -3 -12   5    0.90    7.70
  -3 -12   5    5.30    3.90
  -4 -12  -5   29.00    3.80
   4 -12   5   24.00    4.20
   4  12  -5   29.80    5.10
  -4 -12  -5   26.20    4.70
  -4 -12   5   33.40    9.80
   5  12  -5    8.30    4.40
  -5 -12  -5    3.30    2.20
  -5 -12  -5    3.90    4.60
   5 -12  -5   10.50    5.40
  -6 -12  -5    5.60    2.40
   6 -12   5    3.50    4.10
   6  12  -5    0.00    4.20
   6  12  -5   -0.30    3.00
   6  12  -5    7.30    3.50
   6 -12  -5   10.60    4.50
   6 -12  -5    7.50    5.00
   6  12   5    0.80    3.70
   7  12  -5   -0.80    2.60
   7  12  -5    6.40    3.40
   7 -12   5    3.30    4.40
   7  12  -5    1.70    4.20
   7  12  -5    4.70    4.40
   7 -12  -5    6.20    4.20
   7  12   5    0.80    4.90
   7  12   5    5.60    3.80
   8  12  -5    0.20    2.60
   8  12  -5   10.00    3.10
   8  12  -5    9.10    6.40
   8 -12   5    7.50    4.40
   8  12  -5    8.60    3.30
   8  12  -5    3.20    5.00
   8  12  -5    3.70    4.40
  -8 -12   5    8.20    2.70
   8  12   5    7.70    3.80
   8 -12  -5    6.00    4.00
   9  12  -5    1.90    2.70
   9 -12   5    2.80    3.40
   9  12  -5    2.30    2.80
   9  12  -5    6.40    3.10
   9  12  -5    1.50    4.10
   9  12   5   -1.00    3.50
   9  12   5    0.10    3.80
   9 -12  -5   -1.00    3.00
  10 -12   5    0.60    2.70
  10  12  -5    0.90    3.10
  10  12  -5    6.90    2.60
  10  12  -5    4.90    2.00
  10  12   5    6.00    3.30
  10  12   5    4.90    2.40
  10  12   5    6.90    3.30
   0  13  -5    2.00    2.00
   0 -13  -5    3.10    1.90
   0 -13   5    2.30    2.50
   0 -13  -5    0.80    2.50
   0 -13   5   -2.40    2.90
   1  13  -5   24.10    3.40
   1 -13   5   29.10    4.30
  -1 -13  -5   34.40    3.60
  -1 -13  -5   31.20    5.10
   1 -13  -5   29.50    3.80
  -1 -13   5   30.80    3.60
   1 -13  -5   28.70    3.20
  -1 -13   5   26.60    4.40
   2 -13   5   15.60    3.40
  -2 -13  -5   14.30    2.70
  -2 -13  -5   13.10    3.50
   2 -13  -5   15.30    2.30
  -2 -13   5   14.30    2.60
  -2 -13   5   12.70    4.00
  -3 -13  -5   15.80    2.90
  -3 -13  -5   21.40    4.30
   3 -13   5   17.00    3.30
  -3 -13   5   18.50    5.00
  -4 -13  -5   80.39    8.70
  -4 -13  -5   69.79    5.10
   4 -13  -5   62.49    8.60
   5  13  -5   34.60    6.70
  -5 -13  -5   41.00    6.70
   5 -13   5   33.40    3.50
   5  13  -5   52.49    6.90
   5 -13   5   37.60    6.80
  -5 -13  -5   34.10    4.30
   5 -13  -5   46.70    6.70
   5 -13  -5   37.50    7.50
  -6 -13  -5   17.70    3.00
   6  13  -5   20.10    5.20
   6  13  -5   14.90    4.00
   6 -13   5   20.40    4.90
   6 -13  -5   20.70    6.20
   6 -13  -5   21.30    5.00
   6  13   5   20.50    4.70
   7  13  -5    4.70    3.40
   7 -13   5   -1.20    4.00
   7  13  -5   -0.50    2.80
   7  13  -5    1.80    4.00
   7  13  -5    0.20    4.20
   7 -13  -5    2.00    3.90
  -7 -13   5    2.80    2.70
   7  13   5    0.20    3.60
   8  13  -5    8.00    3.30
   8 -13   5   12.80    4.40
   8  13  -5    8.10    3.70
   8  13  -5    5.60    4.30
   8 -13  -5    6.70    3.90
   8  13   5    8.10    3.90
   8  13   5    8.60    4.40
   9  13  -5   -4.10    3.50
   9  13  -5    0.50    2.40
   9  13  -5   -0.50    1.40
   9  13  -5    0.60    2.60
   9 -13   5   -1.20    3.00
   9  13  -5    1.90    3.10
   9  13   5    1.20    3.40
   9  13   5    4.80    3.70
   9 -13  -5    1.90    2.90
  10 -13   5    8.30    2.70
  10  13  -5    1.70    2.00
  10  13  -5   17.00    2.80
  10  13  -5   23.30    3.90
  10  13   5    7.00    3.00
  10  13   5   16.90    3.30
  10  13   5   18.90    3.30
   0  14  -5   47.60    4.40
   0 -14  -5   52.89    4.30
   0 -14  -5   60.49    5.30
   0 -14   5   54.79    6.60
   1 -14   5  140.09    8.90
  -1 -14  -5  140.19    7.30
  -1 -14  -5  143.19    8.80
   1 -14  -5  128.59    7.10
   1 -14  -5  122.89    7.10
  -1 -14   5  131.59    7.10
  -1 -14   5  136.39    9.60
   2 -14   5   36.60    5.20
  -2 -14  -5   19.70    4.20
  -2 -14  -5   25.40    3.60
  -2 -14   5   20.40    4.30
   2 -14  -5   21.50    3.30
  -2 -14   5   20.90    3.10
   3 -14   5   46.40    5.10
  -3 -14  -5   51.29    4.60
  -3 -14  -5   51.99    6.90
  -3 -14   5   46.60    4.60
  -3 -14   5   47.80    7.50
   3 -14  -5   31.10    6.40
   4 -14   5   25.60    3.70
  -4 -14  -5   26.90    4.10
   4 -14   5   29.00    5.30
   4  14  -5   24.30    4.70
  -4 -14  -5   29.40    5.40
   4 -14  -5   28.80    6.30
   4 -14  -5   24.50    5.00
   4 -14  -5   28.20    6.70
  -4 -14   5   27.20    4.30
   5  14  -5    6.60    5.80
   5  14  -5   -0.30    3.40
   5  14  -5    4.80    3.70
   5 -14   5    0.90    3.90
   5  14  -5    3.20    4.40
   5 -14   5    7.80    1.60
  -5 -14  -5    7.70    4.60
  -5 -14  -5    6.70    2.60
   5 -14  -5   17.50    4.90
  -5 -14   5    8.40    3.00
   5 -14  -5   11.10    5.10
   6  14  -5   -0.90    4.40
   6  14  -5    5.00    4.30
  -6 -14  -5   -2.40    4.40
   6 -14   5    5.50    4.20
   6  14  -5    1.40    3.30
  -6 -14  -5    2.50    2.40
   6  14  -5   -0.80    3.10
   6 -14  -5   -0.70    3.80
   6  14   5   -0.50    3.70
  -6 -14   5    3.70    2.70
   7 -14   5    5.00    4.30
   7  14  -5    9.80    3.80
   7 -14  -5    3.60    3.80
   7  14   5    8.90    4.00
  -7 -14   5   14.70    3.00
   8  14  -5   20.80    4.20
   8 -14   5   17.50    4.40
   8  14  -5   13.90    3.40
   8 -14  -5   12.30    3.90
   8  14   5   14.40    4.30
   9  14  -5    0.30    1.60
   9  14  -5    2.00    2.30
   9 -14   5    4.00    3.00
   9  14  -5    0.90    2.40
   9  14  -5    9.00    3.00
   9 -14  -5    3.10    2.60
   0 -15  -5    6.00    2.70
   0 -15  -5    4.60    2.30
   0 -15   5   -0.30    3.20
   1 -15   5    8.00    3.40
  -1 -15  -5    6.70    3.40
  -1 -15  -5    7.90    2.60
  -1 -15   5    7.00    3.80
  -1 -15   5    7.90    2.50
   1 -15  -5   10.80    2.50
  -2 -15  -5   33.20    4.00
  -2 -15  -5   26.30    4.60
   2 -15   5   30.30    5.20
  -2 -15  -5   21.30    4.70
  -2 -15   5   26.70    4.20
  -2 -15   5   24.20    5.10
   2 -15  -5   17.70    4.40
   3 -15   5   36.90    5.80
  -3 -15  -5   29.80    5.10
  -3 -15  -5   26.60    5.00
  -3 -15  -5   32.70    4.10
   3 -15   5   31.70    4.40
   3 -15   5   28.50    4.10
  -3 -15   5   30.60    4.40
   3 -15  -5   43.90    6.70
   3 -15  -5   33.20    8.50
   3 -15  -5   35.50    6.90
   3 -15  -5   36.90    6.90
  -3 -15   5   36.30    5.80
  -4 -15  -5   18.10    4.50
  -4 -15  -5   15.80    4.80
   4 -15   5   19.20    3.40
  -4 -15  -5   18.60    3.10
   4 -15   5   15.90    4.40
   4 -15  -5   23.90    6.30
   4 -15  -5   15.60    5.90
   4 -15  -5   14.80    4.80
  -4 -15   5   10.90    3.00
  -4 -15   5   15.10    5.10
   4 -15  -5   44.70   10.80
  -5 -15  -5   59.69    8.20
  -5 -15  -5   66.19    5.10
   5  15  -5   55.79    7.50
   5 -15   5   58.89    7.10
  -5 -15   5   60.99    5.30
   5 -15  -5   68.69    7.50
  -6 -15  -5   22.90    3.20
   6  15  -5   21.30    5.20
   6  15  -5   18.00    4.20
   6 -15   5   18.80    4.80
   6  15  -5   14.40    4.70
  -6 -15  -5   19.70    5.30
  -6 -15   5   23.40    3.40
   6 -15  -5   16.90    4.50
   7  15  -5   44.70    7.20
   7 -15   5   41.20    6.40
   7  15   5   37.30    7.10
   7 -15  -5   42.80    6.30
   8  15  -5    2.50    2.80
   8 -15   5    6.50    3.40
   8  15  -5   10.50    3.90
   8  15  -5    2.90    2.90
   8  15  -5   -0.50    1.20
   8 -15  -5    0.30    3.00
   8  15   5   10.90    3.90
   9  15  -5   18.50    3.20
   9  15  -5   31.50    4.30
   9 -15   5   23.80    4.20
   9 -15  -5   26.30    3.70
   9  15   5   23.30    4.10
   0 -16  -5   -2.90    2.20
   0 -16  -5    1.20    3.00
   0 -16   5    0.10    3.70
   0 -16   5    0.00    3.50
   0 -16  -5    0.50    4.60
   0 -16  -5   -1.30    3.70
   0 -16  -5   -0.20    2.40
   0 -16  -5    0.60    2.50
   0 -16   5    0.30    3.10
   1 -16   5    4.70    3.30
  -1 -16  -5   11.60    4.80
  -1 -16  -5    0.50    2.90
  -1 -16  -5    8.40    4.20
   1 -16   5    4.30    3.10
   1 -16   5   -2.30    3.80
  -1 -16  -5    4.90    3.10
  -1 -16  -5    5.20    2.70
  -1 -16  -5   10.40    5.30
  -1 -16   5    2.50    4.70
   1 -16  -5    6.20    5.00
   1 -16  -5    2.00    3.00
   1 -16  -5    2.40    4.10
   1 -16  -5   10.50    2.40
  -1 -16   5    5.70    4.00
  -1 -16   5    8.60    2.50
   1 -16  -5    7.10    2.40
  -2 -16  -5   77.09    5.50
   2 -16   5   61.29    6.00
  -2 -16  -5   60.59    6.20
  -2 -16  -5   62.59    7.00
  -2 -16  -5   86.39    7.70
   2 -16   5   64.49    5.50
  -2 -16  -5   47.70   10.60
  -2 -16   5   69.99    8.40
   2 -16  -5   66.29    9.60
  -2 -16   5   53.59    4.80
   2 -16  -5   73.59    7.60
  -3 -16  -5   53.59    6.90
  -3 -16  -5   48.60    6.40
   3 -16   5   44.60    6.50
  -3 -16  -5   62.99    8.00
   3 -16   5   54.09    4.60
  -3 -16  -5   67.59    4.90
   3 -16  -5   58.39    9.00
  -3 -16   5   58.49    8.70
   3 -16  -5   59.39    7.20
  -3 -16   5   45.70    4.80
  -4 -16  -5   36.10    4.10
   4 -16   5   30.20    3.10
   4 -16   5   32.00    5.90
  -4 -16  -5   37.30    5.90
  -4 -16  -5   33.00    5.60
  -4 -16   5   17.70    5.30
   4 -16  -5   22.00    5.00
   4 -16  -5   11.40    7.60
   4 -16  -5   26.70    6.20
  -4 -16   5   27.00    3.70
   5  16  -5   17.80    4.40
  -5 -16  -5   21.30    3.10
   5 -16   5   26.50    5.10
  -5 -16  -5   19.50    5.10
  -5 -16   5   13.30    3.10
   5 -16  -5   18.80    5.00
   6  16  -5   14.00    4.20
   6 -16   5   11.80    4.30
   6 -16  -5   15.10    4.40
   7  16  -5   29.60    5.20
   7 -16   5   24.50    4.70
   7 -16  -5   18.40    4.20
   7  16   5   24.80    4.80
   8  16  -5    7.60    3.50
   8  16  -5   -0.20    2.50
   8  16  -5   -2.40    2.40
   8 -16   5    0.40    2.80
   8  16  -5    1.20    1.90
   8  16   5   -1.50    3.70
   8 -16  -5    1.00    2.50
   0 -17   5   31.50    5.60
   0 -17  -5   28.10    4.20
   0 -17   5   36.50    5.20
   0 -17  -5   38.10    4.40
   0 -17  -5   29.80    6.40
   0 -17  -5   38.50    6.30
  -1 -17  -5   73.79    9.50
  -1 -17  -5   96.19    6.10
  -1 -17  -5   88.69    7.90
   1 -17   5   87.49    7.20
  -1 -17  -5   76.39    6.70
  -1 -17  -5   86.99    6.50
   1 -17   5   81.69    6.60
   1 -17  -5   72.79    9.70
   1 -17  -5   78.29    5.50
   1 -17  -5   81.79    8.00
   1 -17  -5   79.09    5.20
  -1 -17   5  110.29    8.50
  -1 -17   5  100.99    8.80
  -1 -17   5   83.89    7.30
   2 -17   5   36.40    4.60
  -2 -17  -5   41.20    4.70
  -2 -17  -5   39.50    6.20
   2 -17   5   41.40    5.10
  -2 -17  -5   39.90    6.20
  -2 -17  -5   31.00    5.40
  -2 -17   5   32.60    4.30
   2 -17  -5   44.20    8.60
   2 -17  -5   36.00    6.10
  -2 -17   5   35.70    5.80
   3 -17   5   13.30    4.20
   3 -17   5   -1.80    7.30
  -3 -17  -5   15.10    4.40
  -3 -17  -5   15.80    4.10
  -3 -17  -5   12.70    2.90
  -3 -17  -5   14.50    4.70
   3 -17  -5    0.60    5.60
  -3 -17   5   17.10    3.10
   3 -17  -5   10.30    5.50
  -3 -17   5    6.20    4.90
   3 -17  -5   15.50    4.60
  -4 -17  -5    0.80    3.40
  -4 -17  -5    5.60    4.60
  -4 -17  -5    0.40    4.00
  -4 -17  -5    3.30    2.50
   4 -17   5    6.50    3.90
  -4 -17   5    2.80    4.70
   4 -17  -5    1.30    4.00
   4 -17  -5   10.80    6.90
  -4 -17   5    3.40    2.50
   5 -17   5    8.50    3.80
  -5 -17  -5    8.20    3.60
   5  17  -5    0.60    4.70
  -5 -17   5    5.70    3.30
   5 -17  -5    2.90    4.10
   6  17  -5   14.90    5.30
   6 -17   5   13.40    4.10
   6 -17  -5   11.20    4.00
   7  17  -5    3.50    4.20
   7 -17   5    6.90    3.20
   7  17  -5   -1.60    3.50
   7 -17  -5    0.70    3.00
   7  17   5    3.20    4.30
   8  17  -5    3.10    1.90
   8  17  -5   -3.20    3.30
   8 -17   5    3.50    2.50
   8  17  -5   21.60    4.50
   8  17   5    0.40    3.20
   8 -17  -5    1.00    2.20
   0 -18   5   47.00    6.20
   0 -18  -5   48.50    8.80
   0 -18  -5   45.40    6.50
   0 -18   5   45.90    5.80
   0 -18  -5   44.10    4.60
   0 -18  -5   43.80    4.50
  -1 -18  -5   35.30    5.20
  -1 -18  -5   29.30    4.60
  -1 -18  -5   39.50    6.50
  -1 -18  -5   31.00    6.40
   1 -18   5   38.50    5.40
  -1 -18  -5   47.70    4.40
   1 -18   5   44.60    5.00
   1 -18  -5   43.20    6.90
  -1 -18   5   43.00    7.00
   1 -18  -5   38.70    3.00
   1 -18  -5   36.60    8.30
  -1 -18   5   36.90    6.00
   2 -18   5    9.60    2.50
  -2 -18  -5    7.60    4.00
  -2 -18  -5   10.90    3.50
  -2 -18  -5   10.90    2.80
  -2 -18  -5    0.40    4.50
   2 -18   5   -4.40    5.30
  -2 -18  -5    6.80    3.30
   2 -18  -5   10.00    4.40
   2 -18  -5   13.50    5.30
   2 -18  -5   -1.20    3.90
  -2 -18   5   15.30    5.20
  -2 -18   5    9.30    2.80
  -2 -18   5   17.50    4.70
  -2 -18   5    1.40    4.70
  -3 -18  -5   13.20    4.40
  -3 -18  -5   14.80    3.00
   3 -18   5   17.40    3.00
  -3 -18  -5   15.60    4.20
   3 -18   5   16.50    4.20
  -3 -18  -5   23.20    4.30
   3 -18   5   -0.70    6.20
  -3 -18   5   15.30    6.40
  -3 -18   5   16.90    3.10
   3 -18  -5   16.80    4.70
   3 -18  -5   17.30    5.80
  -4 -18  -5   14.00    4.30
   4 -18   5   13.20    4.10
   4 -18   5    8.10    7.70
   4 -18  -5    0.60    6.70
   4 -18  -5   16.70    4.30
   5 -18   5    0.80    3.20
  -5 -18  -5    1.70    4.00
   5  18  -5   -6.40    5.40
   5 -18  -5    3.40    3.60
   6  18  -5    1.40    4.80
   6 -18   5    1.30    3.00
   6 -18  -5    3.60    3.30
   7 -18   5    0.70    2.40
   7  18  -5    7.20    3.70
   7 -18  -5    2.50    2.60
   0 -19  -5   -2.00    4.40
   0 -19   5    0.90    2.80
   0 -19  -5   -0.60    1.90
   0 -19   5   -0.50    3.50
   0 -19  -5    0.00    2.30
   0 -19  -5   -1.70    3.50
   0 -19  -5    1.10    3.60
   1 -19   5   23.00    4.20
  -1 -19  -5   16.10    3.10
  -1 -19  -5   24.50    4.40
  -1 -19  -5   23.10    5.50
  -1 -19  -5   22.30    4.60
   1 -19  -5   24.80    5.80
   1 -19  -5   15.40    4.50
  -1 -19   5   18.60    3.70
   2 -19   5    2.00    1.90
  -2 -19  -5    5.70    3.60
  -2 -19  -5    3.00    3.10
   2 -19   5    0.50    4.80
  -2 -19  -5    0.40    3.60
   2 -19  -5    5.60    4.60
   2 -19  -5   -1.20    4.10
  -2 -19   5    2.60    3.60
   2 -19  -5    8.00    3.90
  -2 -19   5    6.30    3.60
  -3 -19  -5   29.60    5.00
   3 -19   5   22.20    4.30
  -3 -19  -5   28.90    5.20
   3 -19  -5   26.00    5.00
   4 -19   5   13.40    6.70
  -4 -19  -5    4.70    3.60
   4 -19   5    1.30    3.10
   4 -19  -5    7.00    3.70
   4 -19  -5  -10.10    5.90
  -5 -19  -5   20.90    3.90
   5 -19   5   14.30    3.40
   5 -19  -5   25.80    4.20
   6 -19   5    1.50    2.40
  -6 -19  -5   -1.00    2.80
   6  19  -5   -2.90    4.50
   6 -19  -5    0.40    2.60
   0 -20  -5   13.50    3.50
   0 -20  -5   18.40    5.10
   0 -20   5   22.90    4.00
  -1 -20  -5    6.60    4.30
   1 -20   5   -1.00    3.50
  -1 -20  -5    9.10    3.30
  -1 -20  -5    7.30    2.30
  -1 -20  -5   -0.30    3.30
   1 -20   5    9.20    2.30
   1 -20  -5    7.70    3.30
  -1 -20   5    2.00    3.50
   1 -20  -5    5.40    4.50
  -1 -20   5    5.10    3.10
   2 -20   5    1.10    1.40
  -2 -20  -5    0.00    2.30
  -2 -20  -5    1.80    2.70
   2 -20   5   -1.50    4.10
  -2 -20  -5   -0.80    3.50
  -2 -20   5    0.40    3.70
   2 -20  -5   -5.50    3.60
   2 -20  -5    0.50    3.20
  -2 -20   5   -1.20    2.90
  -3 -20  -5    0.00    2.90
   3 -20   5    8.60    5.70
   3 -20  -5   -3.30    4.70
   3 -20  -5    3.40    3.40
  -3 -20   5    2.40    3.10
   4 -20   5   -5.90    6.90
  -4 -20  -5   13.20    3.30
   4 -20   5    8.70    2.80
   4 -20  -5   -6.30    6.10
   4 -20  -5   17.10    3.80
   5 -20   5   -1.70    2.00
  -5 -20  -5    0.50    2.70
   5 -20  -5    1.60    2.90
   0 -21   5    6.90    2.20
   0 -21   5   -0.80    3.30
   0 -21  -5    4.40    2.70
   0 -21  -5    6.80    4.10
  -1 -21  -5   -1.90    3.60
   1 -21   5    1.80    1.30
   1 -21   5    3.00    3.60
  -1 -21  -5    4.60    2.50
   1 -21  -5   -2.10    3.30
  -1 -21   5   -0.30    3.30
  -1 -21   5    3.30    2.40
   1 -21  -5    0.80    2.10
  -2 -21  -5   13.90    2.30
   2 -21   5   -2.30    4.20
  -2 -21  -5   -5.30    4.10
  -2 -21  -5   10.20    2.60
  -2 -21   5   12.30    2.90
   2 -21  -5   -6.10    3.90
   2 -21  -5    8.60    2.80
  -2 -21   5   -0.10    3.70
   3 -21   5   -4.40    5.30
  -3 -21  -5    5.50    2.40
   3 -21  -5   -1.20    5.00
  -3 -21   5    0.10    2.50
   3 -21  -5    5.30    3.00
  -4 -21  -5   10.40    2.50
   4 -21  -5    6.10    2.90
  -4 -21   5    6.90    2.50
   4 -21  -5   -3.20    5.80
   0 -22  -5   -0.80    1.50
   0 -22  -5   -3.10    3.50
   0 -22   5   -0.80    3.30
   0 -22   5   -1.10    1.10
  -1 -22  -5    8.00    2.10
   1 -22   5   -1.70    3.30
  -1 -22  -5   -2.40    3.10
  -1 -22   5   16.20    2.70
  -1 -22   5   -1.20    3.10
   1 -22  -5    4.20    1.90
   1 -22  -5   -2.10    3.20
   2 -22   5    3.10    4.30
   2 -22  -5   -1.50    3.70
  -2 -22   5   15.40    2.90
   2 -22  -5    8.10    2.40
   3 -22  -5   -0.30    4.80
   0   0   6    0.60    1.40
   0   0   6   -1.80    1.30
   0   0  -6   -0.20    1.40
   1   0  -6   -1.30    1.20
   1   0   6    1.80    1.70
   1   0  -6   -1.20    1.00
  -1   0  -6   -0.50    1.50
   1   0   6   -1.50    1.60
  -1   0   6   -1.80    1.40
   2   0  -6    0.80    1.00
  -2   0   6    4.00    1.40
  -2   0  -6    1.20    1.60
   2   0   6    1.80    1.60
   2   0   6    1.10    1.90
   3   0   6   24.90    3.60
  -3   0  -6   20.60    3.50
   3   0  -6   28.00    2.50
   3   0  -6   20.00    2.60
   3   0   6   28.10    3.70
   4   0   6   20.60    3.10
   4   0   6   15.80    2.10
   4   0  -6   17.10    2.40
  -4   0   6   12.30    2.20
   4   0   6   10.60    2.50
   4   0  -6   16.40    2.60
   5   0  -6   58.99    3.70
   5   0   6   48.90    5.30
   5   0   6   49.99    4.90
   5   0   6   51.69    3.60
   5   0  -6   59.99    4.10
   5   0  -6   45.70    3.00
   6   0  -6    2.40    1.50
   6   0   6   -1.20    2.60
   6   0  -6    1.30    2.20
   6   0   6    7.90    2.70
   6   0   6    4.30    1.80
   7   0  -6   12.40    2.70
   7   0   6   12.70    3.30
   8   0   6    1.50    2.70
   8   0  -6    0.90    2.60
   9   0  -6   23.90    3.90
   9   0   6   16.60    4.30
   9   0   6   17.60    3.60
   9   0   6   15.40    3.00
   9   0   6   15.50    3.90
  10   0   6   -3.70    3.20
  10   0   6    4.50    3.20
  10   0   6    2.70    2.20
  11   0   6   21.90    4.00
  12   0   6   -0.30    2.10
   0   1  -6    1.60    1.60
   0   1   6   -0.70    1.20
   0  -1   6   -0.20    1.60
   0  -1  -6    0.10    1.30
   0  -1   6    0.70    1.40
   0  -1  -6    1.10    1.40
  -1   1   6   15.10    2.50
   1   1  -6   14.80    2.20
   1  -1   6   14.50    2.10
   1   1  -6   14.40    2.50
   1  -1   6   20.80    3.10
  -1  -1  -6   16.30    2.50
  -1  -1   6   14.80    3.10
   1   1   6   12.80    2.00
   1   1   6   17.90    2.90
  -1   1  -6   13.60    2.50
   1  -1  -6   15.90    1.90
   2   1  -6   40.50    2.80
  -2  -1  -6   40.80    3.80
   2  -1   6   44.60    3.90
  -2   1   6   39.30    3.00
   2   1  -6   40.50    3.20
   2   1  -6   41.10    2.90
   2  -1   6   40.80    4.00
   2  -1  -6   41.30    2.40
  -2  -1   6   39.40    4.00
   2   1   6   41.70    4.00
  -2   1  -6   43.00    3.30
   2   1   6   43.10    3.90
   3   1  -6    1.50    1.30
   3  -1   6    2.20    2.00
   3  -1   6    1.00    1.70
   3   1  -6    3.50    1.50
  -3  -1  -6    4.00    2.20
  -3   1   6   -0.50    1.10
   3  -1   6    2.80    1.30
   3  -1  -6    1.50    1.60
   3   1   6    2.40    2.10
   3  -1  -6    1.50    1.10
   3   1   6    2.10    2.10
   3  -1  -6    1.30    0.80
   4   1  -6  164.58    7.60
   4  -1   6  148.89    7.10
   4   1  -6  134.19    7.30
   4  -1   6  162.08    8.30
   4  -1  -6  145.29    6.70
   4   1   6  151.48    7.10
   4   1   6  161.58    9.00
   4   1   6  157.48    8.30
  -4  -1   6  150.38    8.70
   4  -1  -6  157.48    6.80
   4  -1  -6  156.18    7.50
   5   1  -6   53.69    3.80
   5   1  -6   47.40    4.00
   5   1  -6   56.79    4.00
   5  -1   6   57.29    5.10
   5  -1   6   51.79    4.80
   5  -1   6   53.69    3.70
   5  -1  -6   55.79    3.20
   5   1   6   58.19    5.70
   5   1   6   49.30    5.30
   5  -1  -6   56.09    4.30
   5   1   6   52.29    3.50
   6   1  -6   61.59    4.00
   6   1  -6   53.49    4.70
   6   1  -6   57.79    4.30
   6  -1   6   50.59    5.30
   6  -1   6   62.89    4.20
   6  -1   6   55.09    5.70
   6   1   6   54.89    6.20
   6   1   6   61.59    6.10
   6  -1  -6   61.89    4.60
   6  -1  -6   57.99    3.30
   7  -1   6   36.80    5.20
   7  -1   6   32.80    3.80
   7   1  -6   29.90    4.10
   7  -1  -6   31.70    4.30
   7   1   6   30.10    5.20
   8   1  -6   23.50    3.80
   8  -1   6   18.30    3.40
   8  -1  -6   21.10    3.60
   8   1   6   21.20    3.90
   9  -1   6   13.60    3.80
   9   1  -6   12.90    4.50
   9  -1   6    1.10    2.80
   9  -1   6    7.90    2.50
   9  -1   6    9.40    3.80
   9   1  -6    7.00    6.90
   9   1  -6    8.90    3.50
   9   1   6    2.70    2.80
   9   1   6   11.20    3.50
   9   1   6   10.10    3.70
   9  -1  -6    5.90    3.40
   9   1   6   10.70    2.80
   9   1   6   13.90    3.80
  10   1  -6   -0.20    4.30
  10  -1   6   -1.70    3.20
  10  -1   6    3.90    2.00
  10  -1   6    2.20    3.30
  10   1   6    0.50    2.80
  10   1   6    4.70    2.40
  10   1   6   -1.70    3.30
  11  -1   6   -2.90    2.70
  11  -1   6    1.00    2.50
  11   1   6   -1.90    2.90
  12  -1   6   -2.70    1.90
  12   1   6   -0.60    2.40
   0  -2   6  148.09    7.40
   0   2   6  169.68    7.50
   0   2  -6  152.78    7.40
   0  -2  -6  167.58    7.20
   0  -2  -6  147.59    7.20
   0  -2   6  151.18    8.00
  -1   2   6  120.29    5.60
   1   2  -6  107.29    6.00
  -1  -2  -6  122.39    6.00
   1  -2   6  129.69    6.90
   1  -2   6  113.09    6.20
  -1  -2   6  119.19    6.70
   1  -2  -6  105.19    5.20
   1   2   6  118.99    6.20
  -1  -2   6  110.19    6.00
  -1   2  -6  116.79    6.10
   1  -2  -6  122.19    5.20
   1   2   6  128.89    6.50
   2   2  -6  321.17   13.70
   2   2  -6  296.87   13.50
   2   2  -6  312.77   13.30
  -2   2   6  290.87   12.90
   2  -2   6  327.47   13.90
  -2  -2  -6  314.07   13.70
   2  -2   6  326.97   14.30
   2   2   6  300.77   14.10
   2   2   6  305.87   13.90
  -2  -2   6  323.47   14.60
  -2   2  -6  297.57   13.60
   3   2  -6   22.70    3.30
   3  -2   6   24.70    3.50
   3  -2   6   23.90    2.40
  -3  -2  -6   21.00    3.60
   3  -2   6   21.90    4.30
   3   2  -6   27.60    2.60
   3  -2  -6   22.20    2.70
   3   2   6   24.70    3.90
   3   2   6   24.20    4.00
   4  -2   6  446.16   19.80
   4   2  -6  470.95   19.60
   4   2  -6  447.56   19.20
   4  -2   6  433.36   19.00
   4   2   6  461.75   20.10
   4  -2  -6  461.05   19.30
  -4  -2   6  438.86   20.90
   4   2   6  435.66   20.60
   5  -2   6  174.88    9.40
   5   2  -6  195.38    9.10
   5   2  -6  175.38    8.70
   5  -2   6  176.28    8.50
   5  -2   6  169.48    9.30
   5   2  -6  169.88    8.00
   5   2  -6  177.28    8.70
   5   2   6  177.98   10.00
   5  -2  -6  190.18    9.00
   5   2   6  166.58   10.00
  -5  -2   6  182.48   11.10
   6   2  -6   84.39    5.30
   6   2  -6   81.09    5.40
   6   2  -6   79.29    5.50
   6  -2   6   87.79    6.40
   6  -2   6   83.29    5.20
   6  -2   6   81.89    6.40
   6  -2  -6   90.09    5.50
   6   2   6   76.99    6.80
   6   2   6   87.29    7.70
   7   2  -6   40.00    4.50
   7  -2   6   43.20    4.30
   7   2  -6   47.60    3.90
   7  -2   6   54.89    5.50
   7  -2  -6   41.90    4.70
   7   2   6   41.00    5.80
   8   2  -6   70.99    5.90
   8  -2   6   69.39    5.70
   8  -2   6   79.49    6.10
   8   2   6   78.89    7.10
   8  -2  -6   74.69    6.10
   9   2  -6    6.10    6.80
   9   2  -6    3.10    4.00
   9  -2   6    7.90    3.80
   9  -2   6    2.40    3.70
   9  -2   6    6.30    2.30
   9   2   6    4.60    3.60
   9   2   6    2.40    2.70
   9   2   6    0.80    3.00
   9   2   6   -0.60    3.20
   9   2   6    2.10    3.00
  10  -2   6   21.30    4.30
  10  -2   6   19.60    2.50
  10   2  -6   14.30    5.10
  10   2   6   23.10    4.10
  10   2   6   12.80    3.70
  10   2   6   22.60    3.80
  11   2  -6   -2.10    4.70
  11  -2   6    0.00    2.60
  11  -2   6   -3.70    3.00
  11   2  -6    3.10    3.20
  11   2   6    1.80    1.60
  11   2   6    0.40    2.80
  12  -2   6   -0.70    2.40
  12   2   6   -0.30    2.30
   0  -3  -6  155.48    7.50
   0  -3  -6  165.18    7.40
   0  -3   6  155.28    7.90
   0   3  -6  157.48    8.00
   0  -3   6  165.78    8.80
   0   3   6  175.88    7.80
  -1   3   6  207.28    8.60
   1  -3   6  201.78    9.30
  -1  -3  -6  183.08    9.00
   1  -3   6  212.58   10.10
   1   3  -6  183.98    9.20
  -1  -3   6  184.88   10.10
   1  -3  -6  195.38    8.30
  -1  -3   6  190.68    9.30
   1   3   6  199.78    9.40
   1  -3  -6  182.88    8.30
   1   3   6  191.08    9.20
  -1   3  -6  200.98    9.20
   2  -3   6  540.35   21.80
   2   3  -6  521.45   21.90
   2  -3   6  519.95   22.40
   2   3  -6  531.65   22.40
  -2  -3  -6  537.65   22.40
   2  -3   6  521.95   22.90
   2   3   6  520.15   22.60
  -2  -3   6  493.55   22.40
  -2  -3   6  559.94   23.40
  -2   3  -6  511.85   22.30
   2   3   6  515.95   22.80
   3  -3   6   93.49    5.80
   3  -3   6   92.99    6.50
   3  -3   6   96.49    4.80
   3   3  -6   98.49    5.70
   3   3  -6   94.39    5.10
  -3  -3  -6   87.19    5.90
   3  -3  -6   89.29    5.00
   3   3   6   93.09    6.20
   3   3   6   92.09    6.60
  -3  -3   6   86.69    6.40
   4   3  -6   89.29    5.80
   4   3  -6   81.49    5.50
   4  -3   6   85.39    5.50
   4   3  -6   90.29    5.10
   4  -3   6   90.89    5.80
   4  -3   6   90.49    4.90
   4   3   6   86.89    6.80
   4  -3  -6   89.59    5.00
   4   3   6   92.59    6.40
  -4  -3   6   70.89    8.80
   5  -3   6   58.89    5.00
   5   3  -6   50.79    3.50
   5   3  -6   60.49    4.20
   5   3  -6   53.69    4.60
   5  -3   6   49.20    4.70
   5  -3   6   59.19    4.00
   5   3  -6   55.79    4.90
   5  -3  -6   56.39    4.20
   5   3   6   47.00    6.20
   5   3   6   44.30    5.90
  -5  -3   6   50.89    7.60
   6   3  -6   21.10    3.30
   6   3  -6   24.80    4.00
   6   3  -6   24.00    4.00
   6  -3   6   25.10    3.50
   6  -3   6   19.80    3.20
   6  -3   6   21.50    3.30
   6   3   6   14.90    3.40
   6   3   6   25.90    5.30
   6  -3  -6   27.10    3.50
   7   3  -6    4.00    2.50
   7   3  -6    7.10    2.40
   7  -3   6   11.00    2.90
   7  -3   6    9.40    2.50
   7   3   6    6.10    3.30
   7  -3  -6    3.80    2.50
   8   3  -6   19.10    3.50
   8   3  -6   22.60    6.00
   8  -3   6   23.70    4.00
   8  -3   6   20.10    3.20
   8   3   6   27.40    4.40
   8  -3  -6   19.50    3.60
   9  -3   6   31.50    3.70
   9   3  -6   25.00    3.10
   9   3  -6   40.30    5.80
   9  -3   6   32.40    5.50
   9  -3   6   28.00    8.90
   9   3   6   29.30    4.70
   9   3   6   34.40    4.80
   9   3   6   27.50    4.80
   9   3   6   32.00    4.90
  10  -3   6   62.09    6.50
  10   3  -6   63.99    8.70
  10   3   6   52.69    5.70
  10   3   6   56.29    5.40
  10   3   6   58.99    6.90
  11   3  -6    4.00    4.40
  11   3  -6    0.40    3.00
  11  -3   6   -2.90    2.80
  11  -3   6    5.30    2.90
  11   3   6    2.20    1.80
  11   3   6    5.40    4.30
  11   3   6   -2.30    2.60
  12   3  -6   -0.60    2.30
  12  -3   6   -0.20    2.30
  12   3   6   -1.10    1.80
   0  -4  -6  808.62   35.10
   0   4  -6  867.11   35.50
   0  -4   6  893.81   35.60
   0  -4   6  811.62   36.20
   0   4  -6  866.31   35.60
   0  -4  -6  863.91   35.00
  -1  -4  -6  116.29    6.40
   1  -4   6  121.59    6.60
   1  -4   6  133.29    7.50
  -1   4   6  130.29    6.00
   1   4  -6  116.79    6.70
   1   4  -6  119.89    5.90
  -1  -4   6  123.39    6.80
  -1  -4   6  129.89    8.10
   1   4   6  120.39    6.60
   1  -4  -6  127.49    5.60
  -1   4  -6  120.39    6.70
  -2  -4  -6   29.90    3.80
   2  -4   6   31.90    4.20
   2   4  -6   30.40    2.80
   2  -4   6   32.60    3.70
   2   4  -6   29.00    3.90
  -2  -4   6   35.00    5.40
   2  -4  -6   26.70    2.50
   2   4   6   27.20    3.90
  -3  -4  -6   61.59    5.10
   3  -4   6   61.99    4.70
   3   4  -6   59.39    5.00
   3   4  -6   62.29    3.90
   3  -4   6   62.89    3.70
   3  -4  -6   63.59    3.80
   3   4   6   63.69    5.50
   3   4   6   61.39    5.40
   4  -4   6   47.20    4.20
   4  -4   6   49.99    4.40
   4   4  -6   51.29    3.90
   4  -4   6   49.10    3.60
   4   4  -6   58.09    4.90
   4   4  -6   51.19    4.40
  -4  -4   6   66.59    7.80
   4   4   6   50.79    5.40
   4   4   6   54.79    5.70
   4  -4  -6   53.29    3.70
   5  -4   6   41.30    4.50
   5   4  -6   42.30    4.40
   5  -4   6   40.60    3.50
   5   4  -6   47.40    4.90
   5   4  -6   51.19    4.00
   5  -4   6   50.79    4.70
   5   4   6   43.10    5.80
   5   4   6   45.30    5.80
   5   4   6   39.80    6.70
  -5  -4   6   40.60    8.20
   5  -4  -6   49.00    3.90
   6  -4   6   58.09    5.10
   6  -4   6   56.29    5.20
   6   4  -6   57.59    5.40
   6   4  -6   64.69    5.40
   6   4  -6   58.59    4.80
   6  -4   6   59.89    4.50
   6  -4  -6   55.99    4.90
   6   4   6   59.69    6.30
   7  -4   6   12.40    2.90
   7   4  -6   11.80    2.80
   7   4  -6   13.70    2.90
   7  -4   6    9.20    2.70
   7   4   6    9.30    3.60
   7  -4  -6    7.60    2.90
   8   4  -6   56.49    8.10
   8  -4   6   46.80    5.00
   8   4  -6   51.39    5.30
   8   4  -6   60.59    4.90
   8  -4  -6   56.99    5.10
   8   4   6   59.29    7.20
   9   4  -6   11.90    2.30
   9   4  -6    8.40    4.20
   9  -4   6    6.30    7.10
   9  -4   6   11.40    2.10
   9   4  -6    1.20    5.40
   9  -4   6    9.90    4.00
   9   4   6    7.40    3.20
   9   4   6   11.80    3.40
   9   4   6    6.40    3.80
   9   4   6   13.90    4.00
  10  -4   6   21.40    4.30
  10   4  -6   17.00    5.20
  10   4   6   20.30    4.00
  10   4   6   16.90    3.60
  10   4   6   16.60    3.20
  11   4  -6    0.50    2.70
  11   4  -6   -0.80    4.20
  11  -4   6    0.90    2.70
  11  -4   6   -1.60    2.80
  11   4   6    3.90    2.00
  11   4   6    9.40    4.70
  11   4   6   -2.80    2.30
  12   4  -6   15.00    4.00
  12  -4   6   18.30    3.00
  12   4   6   20.10    4.10
   0   5  -6  694.73   30.60
   0  -5   6  689.53   31.30
   0  -5   6  759.92   30.60
   0   5  -6  705.63   30.60
   0  -5  -6  767.72   30.10
  -1  -5  -6  279.47   12.60
   1  -5   6  300.27   13.80
   1  -5   6  283.77   12.80
   1   5  -6  277.27   12.10
   1   5  -6  284.27   13.10
  -1  -5   6  278.67   14.10
  -1  -5   6  278.77   13.00
   1  -5  -6  288.17   12.00
  -1   5  -6  257.67   12.80
   2   5  -6  410.56   17.50
   2   5  -6  420.56   18.40
   2  -5   6  418.36   18.20
  -2  -5  -6  416.66   18.20
   2  -5   6  400.06   18.80
  -2  -5   6  450.05   19.70
   2  -5  -6  374.06   17.20
   3   5  -6   60.49    4.00
   3   5  -6   65.99    5.30
  -3  -5  -6   62.49    5.30
   3  -5   6   63.39    3.90
   3  -5   6   66.39    5.00
   3  -5  -6   61.89    3.90
   4  -5   6  151.28    7.90
   4  -5   6  147.19    7.20
   4   5  -6  128.09    8.00
   4   5  -6  148.99    7.50
   4   5  -6  145.79    8.40
   4   5   6  146.29    9.30
   4   5   6  137.09    8.90
  -4  -5   6  138.29   11.80
   4  -5  -6  149.99    7.20
   5   5  -6   15.50    2.40
   5   5  -6   25.70    4.30
   5   5  -6   16.60    2.80
   5  -5   6   16.20    2.70
   5  -5   6   15.60    2.80
   5  -5   6   25.70    3.90
  -5  -5   6    9.20    4.60
   5   5   6   11.40    3.10
   5  -5  -6   16.50    2.60
   5   5   6   10.50    3.10
   6   5  -6   52.89    4.70
   6  -5   6   52.39    4.50
   6   5  -6   53.89    5.50
   6  -5   6   50.59    4.70
   6   5  -6   56.79    5.60
   6   5   6   46.60    6.10
   6  -5  -6   59.99    4.80
   7   5  -6   14.20    3.20
   7  -5   6   19.80    3.20
   7   5  -6   13.70    3.20
   7  -5   6   18.20    2.90
   7  -5  -6   12.50    2.80
   7   5   6   18.70    4.20
   8  -5   6   28.30    4.40
   8   5  -6   36.40    5.80
   8   5  -6   34.70    4.90
   8  -5   6   36.80    5.90
   8   5  -6   30.90    4.70
   8   5  -6   44.10    5.20
   8   5   6   35.80    5.50
   8   5   6   30.40    4.60
   8  -5  -6   39.50    4.80
   9   5  -6   13.20    4.50
   9   5  -6   21.30    3.50
   9  -5   6   22.50    2.40
   9  -5   6   27.50    9.00
   9  -5   6   22.40    4.80
   9   5   6   16.20    4.30
   9   5   6   26.90    5.20
   9   5   6   31.60    5.10
  10   5  -6   13.70    4.90
  10  -5   6   17.30    4.10
  10   5  -6   12.10    2.00
  10   5   6   13.80    3.00
  10   5   6   14.30    3.70
  11   5  -6    0.40    2.60
  11  -5   6   -1.10    2.60
  11   5  -6    4.90    4.40
  11  -5   6    7.30    3.00
  11   5   6    6.50    2.20
  11   5   6   13.60    4.60
  11   5   6    6.70    2.90
  11   5   6   -0.50    2.20
  12  -5   6    5.30    2.00
  12   5  -6   -1.00    3.40
  12  -5   6    2.20    2.30
  12   5  -6    1.50    2.20
  12   5   6    0.30    1.50
  12   5   6    5.80    3.60
   0  -6   6   39.20    4.40
   0  -6   6   35.30    5.20
   0   6  -6   38.10    4.00
   0   6  -6   38.70    4.20
   0  -6  -6   34.80    3.40
   1  -6   6   74.39    5.50
  -1  -6  -6   79.09    5.40
   1   6  -6   80.19    4.50
   1  -6   6   77.19    6.80
   1   6  -6   80.89    5.80
  -1  -6   6   85.19    7.50
   1  -6  -6   89.59    4.40
  -1  -6   6   86.49    5.90
   2   6  -6    7.30    2.50
   2  -6   6    3.50    2.20
  -2  -6  -6    6.80    2.40
   2   6  -6    4.10    1.60
   2  -6  -6    4.90    1.40
  -2  -6   6    3.20    2.60
   2  -6  -6    6.40    1.10
   3   6  -6  189.88    8.70
   3  -6   6  185.18    9.30
   3   6  -6  184.28    9.70
  -3  -6  -6  188.28    9.70
   3  -6   6  179.78    9.10
   3   6  -6  179.88    9.80
   3  -6  -6  169.38    8.40
   4   6  -6   17.40    3.10
   4  -6   6   18.70    2.90
   4  -6   6   18.20    3.00
   4   6  -6   14.60    3.20
   4   6  -6   17.50    3.00
  -4  -6  -6   17.50    3.50
   4  -6   6   19.70    2.70
  -4  -6   6   12.10    7.10
   4   6   6   16.40    3.80
   4  -6  -6   19.30    2.60
   5   6  -6   36.80    5.10
   5   6  -6   36.60    4.90
   5  -6   6   34.40    4.40
   5   6  -6   38.20    3.80
   5  -6   6   39.90    3.80
   5  -6   6   39.50    4.40
  -5  -6   6   38.60    7.10
   5   6   6   43.70    5.80
   5   6   6   36.10    5.70
   5  -6  -6   43.10    3.90
   6   6  -6   16.60    3.00
   6   6  -6   24.60    3.80
   6  -6   6   25.80    3.60
   6  -6   6   24.40    3.80
   6   6   6   26.70    4.40
   6  -6  -6   21.40    3.30
   7  -6   6   26.10    4.10
   7   6  -6   31.90    4.40
   7   6  -6   33.40    5.30
   7  -6  -6   28.70    4.30
   7   6   6   28.40    5.00
   8   6  -6   35.20    5.30
   8  -6   6   24.30    9.40
   8   6  -6   30.40    4.50
   8   6  -6   29.20    5.30
   8  -6   6   26.10    4.80
   8  -6   6   21.70    3.20
   8   6  -6   26.70    3.90
   8  -6   6   28.20    4.30
   8   6  -6   26.00    4.40
   8   6  -6   20.00    3.80
   8   6   6   25.10    5.10
   8  -6  -6   23.40    3.90
   8   6   6   36.60    6.60
   9   6  -6   29.40    4.10
   9  -6   6   33.00    6.10
   9   6  -6   38.20    7.60
   9  -6   6   44.70   10.40
   9   6   6   41.60    5.50
   9   6   6   43.40    7.00
   9   6   6   42.80    7.20
  10  -6   6    8.00    3.50
  10   6  -6   -2.40    4.20
  10   6  -6   -1.40    3.20
  10  -6   6    0.70    3.30
  10   6  -6    2.80    1.60
  10   6   6    7.20    3.40
  10   6   6    0.60    2.90
  10   6   6    5.40    2.60
  11  -6   6   13.40    3.30
  11   6  -6   17.00    4.70
  11   6   6   13.30    3.20
  11   6   6   26.60    4.90
  11   6   6   17.80    3.60
   0  -7   6   51.99    6.00
   0  -7  -6   51.69    4.10
   0  -7   6   57.59    5.00
  -1  -7  -6   41.60    4.10
   1   7  -6   38.40    3.30
   1  -7   6   44.50    6.00
   1  -7   6   45.20    4.50
  -1  -7   6   46.70    4.80
   1  -7  -6   41.20    3.20
  -1  -7   6   50.09    6.10
  -2  -7  -6   39.70    4.60
   2  -7   6   39.10    4.30
   2   7  -6   40.00    3.30
   2  -7   6   34.60    4.20
  -2  -7  -6   41.20    4.50
   2   7  -6   43.10    4.80
   2  -7  -6   28.90    2.30
   2  -7  -6   33.70    2.30
  -2  -7   6   41.90    6.70
  -3  -7  -6   86.39    6.30
  -3  -7  -6   76.09    4.70
   3  -7   6   88.99    5.70
  -3  -7  -6   76.19    6.10
   3   7  -6   80.59    6.40
   3   7  -6   87.09    5.00
   3  -7   6   82.69    5.50
   3   7  -6   87.09    6.40
   3  -7  -6   79.79    4.60
   4   7  -6    2.20    2.60
   4  -7   6    5.70    2.40
   4   7  -6    3.20    2.30
   4   7  -6    2.80    1.80
  -4  -7  -6    2.10    1.60
  -4  -7  -6    6.60    2.70
   4  -7   6    2.90    2.20
   4  -7  -6    5.50    1.90
  -4  -7   6   -6.00    6.70
   5   7  -6   16.80    2.90
   5  -7   6   22.30    3.70
   5  -7   6   18.60    2.80
   5   7  -6   21.80    3.90
   5  -7   6   15.40    2.80
   5   7  -6   16.00    3.50
   5  -7  -6   17.20    2.90
   5   7   6    7.60    3.20
  -5  -7   6   18.90    6.80
   5   7   6   12.40    3.90
   6   7  -6    0.10    2.70
   6  -7   6    3.00    2.30
   6  -7   6   -2.30    1.80
   6   7  -6    3.90    2.30
   6  -7  -6    2.80    2.30
   6   7   6    1.50    3.10
   7   7  -6    8.30    2.90
   7   7  -6   16.50    3.60
   7  -7   6    9.80    2.60
   7  -7  -6   13.70    3.00
   7   7   6   14.90    4.60
   8   7  -6   28.70    5.60
   8  -7   6   34.70    6.10
   8  -7   6   17.30    3.50
   8   7  -6   25.90    4.20
   8   7  -6   22.10    3.90
   8   7  -6   26.30    4.10
   8  -7   6   26.20    2.70
   8  -7   6   26.00    8.60
   8   7  -6   23.30    4.60
   8   7  -6   29.60    4.30
   8   7   6   26.70    5.30
   8   7   6   26.10    4.80
   8  -7  -6   18.80    3.50
   9   7  -6    1.40    2.20
   9   7  -6   -1.20    2.70
   9  -7   6   -1.90    3.50
   9   7  -6   -0.10    2.30
   9  -7   6   -4.70    6.30
   9   7  -6    0.10    3.90
   9   7  -6   -2.40    3.50
   9   7   6    0.40    3.00
   9   7   6   -1.40    2.60
   9   7   6    3.20    3.90
   9   7   6    0.20    3.30
  10  -7   6    4.10    3.00
  10   7  -6    0.70    4.50
  10  -7   6    3.30    3.40
  10   7  -6    2.00    1.80
  10   7  -6   -1.70    2.70
  10   7   6    5.50    3.40
  10   7   6    0.10    2.50
  10   7   6    3.40    2.60
  11  -7   6    2.30    2.80
  11   7  -6    0.20    2.50
  11   7  -6    6.00    3.90
  11   7   6    4.40    2.20
  11   7   6    5.40    2.90
  11   7   6    5.00    4.00
   0  -8   6   -0.50    2.80
   0  -8  -6   -0.10    1.80
   0  -8   6    1.70    2.40
   0  -8  -6    0.70    1.70
   0  -8   6    3.30    2.60
   1  -8   6    7.80    2.80
  -1  -8  -6    7.70    2.40
  -1  -8  -6    6.90    2.30
   1   8  -6    8.50    1.90
   1  -8   6    8.40    2.50
  -1  -8  -6    4.10    1.90
   1  -8  -6    9.10    1.80
  -1  -8   6   13.30    3.10
  -1  -8   6    4.70    2.90
   2  -8   6    1.50    2.00
   2   8  -6    1.30    1.50
   2  -8   6   -0.40    2.10
  -2  -8  -6   -1.40    2.20
  -2  -8  -6    1.50    2.40
   2   8  -6    2.10    2.80
  -2  -8  -6    1.80    1.70
   2  -8  -6   -1.30    2.40
   2  -8  -6    2.20    1.20
  -2  -8   6    0.50    3.00
  -3  -8  -6    3.00    2.80
  -4  -8  -6   16.40    3.40
   4  -8   6   24.70    3.90
  -4  -8  -6   19.00    2.70
   4  -8   6   21.90    3.80
   4   8  -6   27.80    4.20
   4   8  -6   22.30    3.30
  -4  -8   6   17.80    7.10
   4  -8  -6   24.70    3.00
   5  -8   6   12.20    2.70
   5   8  -6    9.70    2.60
   5   8  -6   10.60    3.70
   5   8  -6   10.80    3.30
  -5  -8   6    7.70    6.80
   5   8   6   11.30    3.80
   5  -8  -6   12.80    2.60
   5   8   6    9.50    3.50
   6   8  -6    6.30    3.30
   6  -8   6    5.00    2.00
   6   8  -6    6.50    2.60
   6  -8  -6    1.40    2.10
   6   8   6    5.90    4.10
   7   8  -6    5.90    4.30
   7   8  -6   -0.30    2.50
   7   8  -6   -0.30    3.10
   7   8   6    1.90    4.00
   7  -8  -6   -4.00    5.30
   7  -8  -6   -0.20    2.40
   8   8  -6   11.90    3.70
   8   8  -6   10.70    3.20
   8  -8   6    9.80    4.40
   8   8  -6   14.40    3.60
   8   8  -6   11.30    3.60
   8   8  -6   14.60    4.60
   8   8   6   14.40    4.10
   8   8   6   18.20    4.80
   9   8  -6   -3.10    2.80
   9   8  -6    5.70    2.40
   9   8  -6    1.20    2.50
   9   8  -6    0.70    4.20
   9   8  -6    3.00    2.80
   9  -8   6    4.90    3.90
   9   8   6    2.00    3.40
   9   8   6    0.20    2.70
   9   8   6    3.10    3.20
   9   8   6    7.70    4.30
  10   8  -6    3.30    2.10
  10   8  -6    4.70    2.00
  10   8  -6   -0.20    2.80
  10  -8   6    2.20    3.30
  10   8  -6   -1.90    4.10
  10   8   6    4.20    2.70
  10   8   6    4.30    4.70
  10   8   6   -0.30    2.20
  10   8   6    2.80    3.40
  11   8  -6   14.10    4.00
  11  -8   6    9.30    2.90
  11   8   6   10.40    3.10
  11   8   6   13.30    4.10
  11   8   6   14.60    2.50
   0  -9   6  106.19    8.30
   0  -9  -6   93.29    5.10
   0  -9  -6  101.09    6.00
   0  -9   6   94.29    6.80
   0  -9   6  102.49    6.80
   0  -9  -6   94.29    5.70
  -1  -9  -6    7.20    2.20
  -1  -9  -6    3.50    1.40
   1   9  -6    6.50    2.00
  -1  -9  -6    6.20    2.40
   1  -9   6    4.80    2.40
   1  -9   6    5.60    2.60
  -1  -9   6    5.50    2.80
   1  -9  -6    5.40    1.80
   1  -9  -6    4.00    1.60
   1  -9  -6    8.20    1.80
  -1  -9   6    1.70    2.70
  -2  -9   6    7.60    3.10
   4   9  -6   22.20    4.10
  -4  -9  -6   17.70    2.70
  -4  -9  -6   18.80    3.90
   4  -9   6   20.90    3.10
   4   9  -6   16.50    2.70
   4  -9   6   18.40    3.20
  -4  -9   6   16.20    7.30
   4  -9  -6   21.50    3.00
   5   9  -6   15.80    3.90
   5   9  -6   22.80    3.60
  -5  -9  -6   18.80    2.50
   5  -9   6   16.60    2.90
   5   9   6   15.40    4.10
   5  -9  -6   21.60    3.40
  -5  -9   6   17.80    8.40
   6   9  -6   10.40    2.70
   6   9  -6   16.50    4.10
   6   9   6   15.50    4.60
   6  -9  -6    7.00    2.60
   7  -9   6   -0.20    3.80
   7   9  -6   -0.60    3.30
   7   9  -6   -0.60    3.70
   7   9  -6    1.20    3.00
   7   9  -6    4.60    4.10
   7   9   6   -1.90    4.20
   7  -9  -6   -3.20    2.50
   7  -9  -6   -5.40    5.00
   7   9   6   -2.10    3.40
   8   9  -6   -0.40    2.90
   8   9  -6   -0.70    3.00
   8  -9   6   -2.40    3.80
   8   9  -6   -0.70    2.90
   8   9  -6    3.70    3.40
   8   9  -6   -1.10    2.70
   8   9  -6    2.70    4.10
   8   9   6    2.10    3.40
   8   9   6    1.00    3.50
   8   9   6    1.90    4.30
   8  -9  -6   -0.90    5.10
   9   9  -6    7.10    3.00
   9   9  -6    5.30    2.60
   9  -9   6   10.20    4.10
   9   9  -6    8.30    4.50
   9   9  -6    1.10    3.20
   9   9  -6    8.80    4.50
   9   9   6    8.70    3.60
   9   9   6    9.70    4.70
   9   9   6    7.20    3.70
   9   9   6    0.50    3.00
  10   9  -6    2.10    3.00
  10   9  -6    5.30    4.20
  10  -9   6    9.30    3.60
  10   9  -6   11.80    2.30
  10   9   6    4.00    2.80
  10   9   6    0.20    2.00
  10   9   6    7.50    4.60
  10   9   6    6.80    3.50
  11  -9   6    4.60    2.60
  11   9  -6   -1.20    1.90
  11   9  -6    2.30    3.20
  11   9   6    5.90    2.80
  11   9   6    3.60    3.30
  11   9   6    0.70    1.60
  11   9   6    5.00    2.10
   0 -10   6  204.18   11.00
   0 -10   6  199.58   10.80
   0 -10  -6  209.68   10.20
   0 -10  -6  201.58    9.70
   0 -10  -6  194.28    9.20
  -1 -10  -6   11.10    2.50
  -1 -10  -6    8.40    2.70
   1 -10   6   10.90    2.80
   1 -10   6   13.10    3.10
   1  10  -6   10.00    2.10
  -1 -10  -6    9.80    2.00
   1 -10  -6   11.20    1.80
  -1 -10   6    9.00    3.40
   1 -10  -6   12.00    2.10
  -1 -10   6   13.90    3.40
   1 -10  -6   13.90    2.20
  -2 -10  -6   57.99    3.80
  -2 -10  -6   50.09    5.50
  -2 -10  -6   53.99    5.50
   2 -10   6   63.49    5.30
   2 -10   6   60.39    5.50
   2  10  -6   64.19    4.40
   2 -10  -6   59.59    3.80
  -2 -10   6   70.29    6.70
   2 -10  -6   62.19    3.80
  -3 -10  -6   78.29    6.70
   3 -10   6   87.79    6.40
   3  10  -6   80.49    5.30
   3  10  -6   80.89    7.10
  -3 -10  -6   81.39    4.90
   3 -10   6   77.39    6.20
   3 -10  -6   86.79    4.80
   4  10  -6    2.20    2.10
   4 -10   6    0.20    2.20
  -4 -10  -6   -3.30    2.90
  -4 -10  -6    0.10    1.80
   4  10  -6    2.20    3.00
  -4 -10   6  -19.30    6.40
  -5 -10  -6   47.50    3.90
  -5 -10  -6   55.59    7.30
   5  10  -6   57.89    4.80
   5  10  -6   45.60    6.90
   5 -10   6   53.49    4.80
  -5 -10   6   67.89   11.30
   5  10   6   52.29    7.30
   5 -10  -6   47.10    5.20
   6  10  -6    4.70    3.90
   6 -10  -6    5.30    2.60
   6 -10  -6    2.00    3.00
   6  10   6    5.90    4.50
   7  10  -6   12.60    4.30
   7 -10   6    8.40    4.40
   7  10  -6    2.90    3.70
   7  10  -6   11.60    4.10
   7  10  -6    5.60    4.10
   7  10  -6    7.70    3.30
   7 -10  -6    7.40    5.70
   7 -10  -6    2.80    2.60
   7  10   6    6.20    4.60
   7 -10  -6    8.70    4.20
   7  10   6    4.00    3.60
   8  10  -6   15.60    4.10
   8  10  -6   11.70    4.70
   8  10  -6    9.50    3.70
   8  10  -6   10.00    3.50
   8  10  -6   10.40    3.20
   8 -10   6   11.70    4.50
   8  10   6   13.00    5.30
   8  10   6    2.70    3.50
   8  10   6   12.50    3.90
   9  10  -6   10.70    3.20
   9 -10   6    4.60    3.80
   9  10  -6    1.70    4.40
   9  10  -6   -0.10    2.50
   9  10  -6    3.80    2.70
   9  10   6    1.00    3.00
   9  10   6    5.40    3.80
  10  10  -6   17.00    3.30
  10 -10   6   15.60    3.70
  10  10  -6   17.60    3.40
  10  10  -6   21.20    4.90
  10  10   6   21.10    4.00
  10  10   6   26.60    4.50
  10  10   6   20.20    4.50
  11  10  -6   12.70    3.30
  11 -10   6    6.00    2.50
  11  10   6   12.20    2.80
  11  10   6    8.00    3.00
  11  10   6   12.80    2.20
   0 -11   6   23.70    4.00
   0 -11  -6   22.30    2.90
   0 -11  -6   25.20    4.00
   0 -11   6   24.10    2.80
   0 -11  -6   18.50    2.80
   0 -11   6   23.10    3.80
  -1 -11  -6   26.10    4.40
   1 -11   6   19.10    3.50
  -1 -11  -6   25.60    3.00
  -1 -11  -6   25.20    4.10
   1  11  -6   27.90    3.20
   1 -11   6   24.30    3.80
   1 -11  -6   26.30    3.30
   1 -11  -6   23.60    2.80
  -1 -11   6   29.60    4.10
   1 -11  -6   24.70    3.30
  -3 -11  -6   24.10    4.30
   3 -11   6   27.00    4.70
   3  11  -6   31.40    3.60
  -3 -11  -6   23.20    3.30
  -3 -11   6   12.10    8.20
   4  11  -6  100.79    6.20
   4  11  -6  101.69    8.40
  -4 -11  -6   80.99    8.10
   4 -11   6   88.99    6.40
  -4 -11  -6   92.69    5.50
  -4 -11   6   72.09   13.60
  -5 -11  -6   60.09    8.00
   5  11  -6   71.39    8.10
  -5 -11  -6   64.99    4.60
  -5 -11   6   73.49   12.60
   5  11   6   62.89    8.20
   6 -11   6   25.80    5.10
   6  11  -6   35.30    5.70
   6  11  -6   29.30    5.40
   6  11  -6   26.30    4.50
   6 -11  -6   29.90    6.70
   6 -11  -6   30.50    5.30
   6  11   6   33.00    7.10
   7  11  -6   49.80    7.50
   7  11  -6   40.10    6.50
   7  11  -6   40.80    7.90
   7 -11   6   35.40    6.70
   7  11  -6   53.49    7.70
   7  11   6   43.30    7.10
   7  11   6   56.49    9.10
   7 -11  -6   38.70    6.80
   7 -11  -6   49.10    8.50
   8 -11   6   35.70    6.60
   8  11  -6   27.60    4.70
   8  11  -6   40.90    5.30
   8  11  -6   42.70    6.30
   8  11  -6   38.30    6.10
   8  11   6   33.00    6.80
   8 -11  -6   43.00    6.90
   8  11   6   41.60    6.50
   9  11  -6    1.00    2.90
   9  11  -6    1.90    4.20
   9 -11   6    2.10    3.70
   9  11  -6    0.40    2.70
   9  11  -6   -2.30    2.50
   9  11   6    2.30    3.60
   9  11   6   -1.00    2.60
   9  11   6   -0.30    3.90
  10  11  -6    4.30    3.80
  10  11  -6    8.40    2.80
  10  11  -6   11.10    2.20
  10 -11   6    5.70    3.10
  10  11   6    6.70    2.70
  10  11   6    7.00    3.50
 -10  11  -6    9.90    2.40
  10  11   6   13.70    3.70
   0 -12   6   -1.30    2.50
   0 -12  -6    1.60    3.10
   0 -12  -6   -0.20    1.80
   0 -12   6    6.50    3.10
   0 -12  -6    1.20    2.20
  -1 -12  -6    9.60    2.20
  -1 -12  -6    8.80    2.90
   1 -12   6   14.00    3.40
  -1 -12  -6    9.60    2.70
   1 -12   6    6.60    2.90
   1  12  -6    6.20    2.10
   1 -12  -6   16.50    2.30
  -1 -12   6   12.90    3.70
   1 -12  -6   14.00    2.20
   2 -12   6  169.78    9.50
   2  12  -6  154.08    8.30
  -2 -12  -6  147.29    9.50
  -2 -12  -6  167.48    8.00
  -2 -12   6  154.38   10.40
   2 -12  -6  150.08    7.70
  -3 -12  -6   36.90    3.90
   3  12  -6   26.90    3.70
   3 -12   6   27.90    4.00
  -3 -12  -6   28.30    4.40
  -3 -12   6   38.30    6.50
  -3 -12   6   25.00    9.80
   4 -12   6  124.49    7.40
  -4 -12  -6  119.39    9.40
  -4 -12  -6  106.89    6.50
   4  12  -6  129.99    9.60
  -4 -12   6  114.19   15.30
   5  12  -6   76.49    8.60
  -5 -12  -6   64.59    5.00
  -5 -12  -6   60.69    8.60
   5 -12  -6   70.09    8.60
   6  12  -6  101.89    9.50
   6 -12   6   94.39    4.90
   6 -12   6   97.39    8.40
   6  12  -6   92.49    8.10
  -6 -12  -6   84.39    6.30
   6  12   6   96.89    8.80
   6 -12  -6   90.39    8.60
   6 -12  -6  121.19   10.60
   7  12  -6    2.00    3.80
   7 -12   6   -1.40    4.10
   7  12  -6    0.00    3.10
   7  12  -6    1.40    4.30
   7  12  -6    1.00    4.10
   7  12  -6   -1.00    2.40
   7 -12  -6    3.30    3.90
   7  12   6    2.10    5.00
   7  12   6    2.60    3.70
   7 -12  -6   11.30    5.90
   8 -12   6   45.80    6.70
   8  12  -6   60.89    6.10
   8  12  -6   60.49    8.50
   8  12  -6   67.99    7.40
  -8 -12   6   53.59    4.90
   8  12   6   52.59    7.50
   8 -12  -6   49.00    6.70
   9  12  -6    8.50    2.80
   9  12  -6    5.70    4.30
   9  12  -6   10.70    3.40
   9  12  -6   10.70    2.90
   9 -12   6    8.90    3.70
   9  12   6    6.50    3.80
   9  12   6    8.00    3.90
  10  12  -6   54.89    5.10
  10  12  -6   53.89    4.00
  10  12  -6   55.59    6.10
  10 -12   6   53.39    5.00
  10  12   6   56.49    4.90
  10  12   6   41.90    5.20
  10  12   6   52.59    6.10
   0  13  -6   34.00    4.00
   0 -13  -6   37.40    4.80
   0 -13  -6   36.20    3.80
   0 -13   6   40.00    6.00
  -1 -13  -6    6.20    2.30
   1 -13   6    3.50    3.00
  -1 -13  -6    7.80    3.00
   1  13  -6    6.40    2.20
   1 -13  -6    5.40    2.10
   1 -13  -6    6.10    2.10
  -1 -13   6    9.70    3.50
  -1 -13   6    5.50    2.20
  -2 -13  -6  135.69    8.90
   2 -13   6  160.88    9.20
  -2 -13  -6  138.79    7.50
   2  13  -6  134.89    7.80
  -2 -13   6  156.78    9.90
   2 -13  -6  138.19    7.20
  -3 -13  -6   25.60    4.70
  -3 -13  -6   20.80    3.00
   3 -13   6   29.40    4.90
  -3 -13   6   25.80    5.20
  -4 -13  -6  229.78   10.90
   4 -13   6  214.88   11.10
  -4 -13  -6  233.18   13.60
   4 -13  -6  219.88   14.80
  -5 -13  -6   28.70    5.80
   5  13  -6   36.60    5.90
   5  13  -6   33.70    4.90
   5  13  -6   29.20    5.40
   5 -13   6   27.80    3.60
   5 -13   6   37.10    5.90
  -5 -13  -6   27.50    3.80
   5 -13  -6   34.60    7.40
   5 -13  -6   31.80    5.70
   5 -13  -6   30.40    6.30
   6  13  -6   23.80    5.20
   6  13  -6   29.50    5.60
  -6 -13  -6   28.70    6.10
  -6 -13  -6   29.60    4.00
   6  13  -6   38.00    6.50
   6 -13   6   28.60    5.30
   6 -13  -6   33.10    5.60
   6 -13  -6   29.70    7.00
   6  13   6   22.70    4.90
   7  13  -6   23.20    4.90
   7 -13   6   23.00    5.30
   7  13  -6   22.80    4.20
   7  13  -6   22.00    5.00
  -7 -13   6   22.00    3.50
   7  13   6   21.60    4.60
   7 -13  -6   17.50    4.80
   8  13  -6   28.30    4.20
   8  13  -6   22.00    5.10
   8 -13   6   18.40    4.70
   8  13  -6   37.80    6.60
   8 -13  -6   19.50    4.50
   8  13   6   24.60    5.10
   8  13   6   26.40    4.80
   9  13  -6   11.00    3.30
   9  13  -6    3.70    3.70
   9  13  -6    5.30    2.60
   9  13  -6    0.30    1.80
   9  13  -6    1.40    2.60
   9 -13   6    2.70    3.10
   9  13   6   11.30    3.90
   9  13   6    4.40    3.30
  10 -13   6    0.80    2.40
  10  13  -6   -0.60    2.30
  10  13  -6    5.10    1.70
  10  13  -6    2.80    2.80
  10  13   6    5.20    2.70
  10  13   6    3.80    2.20
  10  13   6    3.80    2.90
   0 -14  -6   11.00    2.80
   0 -14   6   12.30    3.80
   0 -14  -6   14.00    2.70
   0  14  -6   11.10    2.60
  -1 -14  -6   95.99    7.10
   1 -14   6   94.49    7.70
   1  14  -6   74.59    5.60
  -1 -14  -6   93.79    5.60
   1 -14  -6   84.49    5.30
  -1 -14   6   82.99    5.30
  -1 -14   6   73.69    7.70
   2 -14   6   90.59    7.10
  -2 -14  -6   88.09    5.70
  -2 -14  -6   87.29    7.30
   2 -14  -6   77.99    5.20
  -2 -14   6   83.29    8.10
  -2 -14   6   75.19    5.40
   3 -14   6  126.99    8.00
  -3 -14  -6  133.09    9.40
  -3 -14  -6  123.49    7.00
   3 -14  -6  112.29   10.50
  -3 -14   6  140.19    9.90
  -3 -14   6  108.89    7.10
   4 -14   6   30.60    4.00
   4 -14   6   27.90    5.10
  -4 -14  -6   25.30    5.00
  -4 -14  -6   29.50    4.10
   4  14  -6   22.20    4.70
   4 -14  -6   50.59    9.00
   4 -14  -6   28.40    5.20
   4 -14  -6   23.20    5.80
   4 -14  -6   29.10    6.30
  -4 -14   6   21.90    3.50
   5  14  -6   27.70    5.90
  -5 -14  -6   25.50    4.00
   5 -14   6   22.50    3.10
   5  14  -6   23.00    4.40
   5  14  -6   23.80    5.60
   5 -14   6   24.90    5.40
  -5 -14  -6   19.80    5.10
   5 -14  -6   29.80    6.60
   5 -14  -6   34.00    5.50
  -5 -14   6   28.00    4.60
  -6 -14  -6   27.90    5.60
   6  14  -6   19.00    4.00
   6  14  -6   18.20    5.00
   6  14  -6   19.60    5.40
   6 -14   6   21.40    4.80
  -6 -14  -6   19.10    3.10
  -6 -14   6   26.50    4.30
   6 -14  -6   23.00    4.90
   7  14  -6   49.70    6.90
   7 -14   6   37.20    6.80
   7 -14  -6   46.60    6.30
   7  14   6   41.70    7.40
  -7 -14   6   34.70    4.50
   8  14  -6   -1.40    2.70
   8 -14   6    4.70    3.70
   8  14  -6    3.10    3.50
   8  14  -6    2.10    3.00
   8  14  -6   -0.70    2.00
   8  14   6    2.30    3.80
   8 -14  -6    0.10    3.20
   9 -14   6   13.00    3.40
   9  14  -6   12.90    2.80
   9  14  -6   15.60    3.20
   0 -15  -6   24.40    3.70
   0 -15   6   25.00    4.50
   0 -15  -6   22.90    3.30
  -1 -15  -6   22.30    5.90
  -1 -15  -6   17.50    3.80
  -1 -15  -6   25.90    3.80
   1 -15   6   23.60    4.20
  -1  15  -6   22.70    3.90
   1 -15  -6   14.90    4.90
  -1 -15   6   19.80    4.50
   1 -15  -6   20.90    3.00
  -1 -15   6   25.20    3.20
  -2 -15  -6   -0.80    2.40
   2 -15   6    6.40    3.20
  -2 -15  -6    6.80    3.80
   2 -15   6   -2.40    8.10
  -2 -15  -6    7.50    3.70
   2 -15  -6    0.40    2.80
  -2 -15   6    2.70   10.50
  -2 -15   6    4.90    2.50
   2 -15  -6    3.00    3.60
  -2 -15   6    2.10    4.00
   2 -15  -6    2.10    2.10
  -3 -15  -6   38.90    5.90
  -3 -15  -6   25.00    4.80
  -3 -15  -6   27.80    3.90
   3 -15   6   26.80    4.60
   3 -15   6   28.60    4.30
   3 -15   6   31.90    5.20
  -3 -15  -6   32.90    5.30
  -3 -15   6   32.00    4.20
  -3 -15   6   26.00    5.50
   3 -15  -6   36.50    6.60
   3 -15  -6   29.20    6.10
   3 -15  -6   19.80    5.80
   4 -15   6   -0.50    3.60
   4  15  -6    4.70    3.20
   4  15  -6    2.70    3.50
  -4 -15  -6    7.90    4.50
   4 -15   6    5.10    2.20
  -4 -15  -6    5.30    3.90
  -4 -15  -6    4.70    2.50
   4 -15  -6    8.50    5.30
   4 -15  -6    4.20    4.30
   4 -15  -6    5.00    4.90
  -4 -15   6   -1.60    2.60
  -4 -15   6    7.20    5.20
  -5 -15  -6   24.40    5.30
   5 -15   6   24.00    5.00
   5 -15   6   30.80    2.40
  -5 -15  -6   28.60    4.00
   5  15  -6   26.60    4.50
   5 -15  -6   37.70    6.40
  -5 -15   6   30.20    4.50
   5 -15  -6   32.70    7.10
  -6 -15  -6   10.60    4.90
   6  15  -6    8.00    3.60
   6 -15   6    9.90    4.30
   6  15  -6   11.80    4.80
  -6 -15  -6    6.60    2.50
  -6 -15   6    8.20    2.80
   6 -15  -6    9.30    4.20
   7  15  -6   18.00    4.30
   7 -15   6   14.80    4.60
   7  15   6   15.10    4.40
   7 -15  -6   11.40    3.80
   8  15  -6   42.30    6.50
   8 -15   6   23.50    4.30
   8  15  -6   20.30    3.40
   8  15  -6   20.00    3.50
   8 -15  -6   21.30    3.90
   8  15   6   19.60    4.20
   9 -15   6    2.90    2.60
   9  15  -6    4.80    2.20
   9  15  -6    9.90    2.70
   9  15  -6   -0.40    1.50
   9  15   6    8.70    3.50
   0 -16   6   -1.60    3.60
   0 -16  -6    0.60    2.40
   0 -16  -6    0.40    2.40
   0 -16   6    0.70    3.30
   0 -16  -6    0.00    4.70
   0 -16  -6   -0.40    2.40
   0 -16   6    1.10    3.20
   0 -16  -6    0.10    3.80
   0 -16  -6    3.00    3.30
  -1 -16  -6    9.50    2.80
  -1 -16  -6    5.10    3.10
   1 -16   6    6.90    3.30
  -1 -16  -6    6.30    4.80
  -1 -16  -6    8.90    4.20
   1 -16   6   -0.70    3.50
  -1 -16  -6   10.50    3.30
   1 -16   6    6.70    3.50
  -1 -16  -6    8.40    4.80
   1 -16  -6   12.60    2.30
   1 -16  -6    2.00    2.70
  -1 -16   6    5.50    2.40
  -1 -16   6   -1.70    4.60
   1 -16  -6   10.50    4.30
  -1 -16   6    8.90    4.30
   1 -16  -6   12.50    5.60
   1 -16  -6   10.10    2.60
   2 -16   6   -0.70    2.70
  -2 -16  -6    6.80    3.70
  -2 -16  -6    0.80    3.80
  -2 -16  -6    0.00    2.50
   2 -16   6   -2.50    2.70
  -2 -16  -6    4.30    4.50
  -2 -16  -6    3.50    3.40
   2 -16   6    0.70    5.40
  -2 -16   6   -3.70    3.90
   2 -16  -6    1.90    4.30
  -2 -16   6    5.40    2.60
   2 -16  -6   -1.20    4.50
   2 -16  -6    2.20    3.30
  -2 -16   6    6.00    6.40
   3 -16   6    6.30    2.40
  -3 -16  -6    7.10    4.00
  -3 -16  -6    5.50    2.70
  -3 -16  -6    6.00    3.80
  -3 -16  -6    4.70    4.30
   3 -16   6   -5.70    7.30
   3 -16   6    1.40    3.60
   3 -16  -6    4.30    4.20
   3 -16  -6    5.80    5.10
  -3 -16   6   11.90    4.90
   3 -16  -6    4.90    5.30
  -3 -16   6    2.90    2.60
  -4 -16  -6   -0.10    3.50
  -4 -16  -6   -0.90    4.00
   4 -16   6    2.90    1.90
  -4 -16  -6    1.50    2.40
   4 -16   6    0.50    3.70
   4 -16  -6   12.00    6.50
   4 -16  -6    7.90    4.20
  -4 -16   6    5.30    2.80
  -4 -16   6    0.10    4.80
   4 -16  -6    4.30    5.00
   5  16  -6    2.20    3.00
  -5 -16  -6    4.10    2.50
  -5 -16  -6    6.00    4.50
   5 -16   6    2.80    3.80
  -5 -16  -6    4.10    3.60
   5  16  -6    9.60    4.20
  -5 -16   6    7.20    2.80
   5 -16  -6    6.80    4.20
   6 -16   6    1.30    3.70
   6  16  -6    2.10    2.50
   6  16  -6    1.60    3.90
   6 -16  -6   -3.60    3.40
   7  16  -6    4.60    4.30
   7 -16   6    5.50    3.60
   7  16  -6   -0.90    1.90
   7 -16  -6    3.50    3.30
   7  16   6    5.30    4.10
   8  16  -6    3.30    2.50
   8  16  -6    1.20    2.60
   8 -16   6    4.40    2.90
   8  16  -6    6.70    3.20
   8 -16  -6    4.50    2.70
   8  16   6    2.50    3.80
   0 -17  -6    5.50    4.70
   0 -17   6   -2.00    3.50
   0 -17   6    3.40    3.70
   0 -17  -6   -1.20    3.60
   0 -17  -6   -2.80    3.80
   0 -17  -6    3.10    2.50
   0 -17  -6   -1.90    2.30
   0 -17   6    2.60    3.20
   1 -17   6   12.60    3.30
  -1 -17  -6    6.60    2.80
  -1 -17  -6    8.70    4.90
  -1 -17  -6    3.60    4.30
  -1 -17  -6    6.70    3.00
  -1 -17  -6   13.40    4.60
   1 -17   6   10.40    3.40
  -1 -17  -6   12.20    3.30
   1 -17  -6    6.70    1.90
   1 -17  -6   12.60    2.60
   1 -17  -6   10.90    5.20
  -1 -17   6   13.80    4.60
   1 -17  -6   13.90    4.60
  -1 -17   6    1.10    4.60
  -1 -17   6   11.90    3.90
  -2 -17  -6   11.90    2.90
   2 -17   6   -3.60    5.50
  -2 -17  -6   15.50    3.70
  -2 -17  -6   10.90    4.40
  -2 -17  -6    8.20    5.40
   2 -17   6    4.80    3.00
  -2 -17  -6   13.00    4.80
   2 -17   6   10.20    2.80
  -2 -17  -6    9.90    3.60
   2 -17  -6    7.30    5.20
  -2 -17   6   -0.10    5.90
   2 -17  -6    1.40    3.20
  -2 -17   6    4.10    4.50
   2 -17  -6   -0.40    3.80
  -2 -17   6   10.00    2.70
   3 -17   6    0.50    1.50
   3 -17   6    0.00    7.50
  -3 -17  -6    3.90    4.00
  -3 -17  -6    6.40    2.70
  -3 -17  -6    8.00    3.80
   3 -17   6    5.70    3.60
  -3 -17  -6    4.40    4.10
   3 -17  -6    4.80    3.90
  -3 -17   6    3.80    6.10
  -3 -17   6    2.10    4.60
   3 -17  -6   -2.70    5.40
  -3 -17   6    5.20    2.60
   3 -17  -6    5.50    5.30
  -4 -17  -6   14.30    4.10
  -4 -17  -6    8.20    2.70
  -4 -17  -6   16.70    4.90
   4 -17   6    7.10    1.60
  -4 -17  -6   14.80    4.30
   4 -17   6    4.90    3.90
   4 -17  -6   10.20    4.20
   4 -17  -6   10.00    6.70
  -4 -17   6   11.40    5.00
  -4 -17   6    5.60    2.70
   5  17  -6   -1.80    5.00
   5 -17   6   -2.60    3.20
   5 -17  -6    4.20    4.00
   6  17  -6    3.90    4.90
   6  17  -6   -3.30    5.30
   6 -17   6    2.80    3.60
   6 -17  -6    0.80    3.30
   7  17  -6    1.90    3.60
   7 -17   6   -0.30    2.80
   7  17  -6    4.80    4.10
   7  17   6    3.70    4.10
   7 -17  -6    3.10    2.90
   8 -17   6    0.30    2.20
   8  17  -6    0.30    1.80
   8  17  -6   -1.50    3.20
   8  17  -6    6.70    2.80
   8  17   6    3.70    3.20
   8 -17  -6    2.40    2.20
   0 -18   6    8.90    3.70
   0 -18   6   14.70    3.60
   0 -18  -6   15.90    2.70
   0 -18  -6   17.20    4.70
   0 -18  -6    9.80    5.10
   0 -18  -6   21.40    3.10
  -1 -18  -6    6.10    2.70
   1 -18   6   12.90    3.40
  -1 -18  -6    1.20    4.10
  -1 -18  -6   12.10    3.00
  -1 -18  -6    9.70    5.00
  -1 -18  -6   10.20    4.30
   1 -18   6   11.50    3.10
   1 -18   6    0.70    3.90
  -1 -18   6    0.20    4.20
   1 -18  -6    4.10    2.40
  -1 -18   6    8.10    4.20
  -1 -18   6    8.40    3.70
   1 -18  -6    5.60    4.00
   1 -18  -6   -1.20    3.20
   1 -18  -6    7.20    4.90
  -2 -18  -6    2.80    3.10
   2 -18   6    0.90    2.30
  -2 -18  -6    2.80    4.20
  -2 -18  -6    3.60    3.60
  -2 -18  -6    4.40    2.60
  -2 -18  -6    0.80    3.10
   2 -18   6    1.90    5.60
   2 -18  -6   -1.50    3.90
  -2 -18   6    4.70    4.60
  -2 -18   6    2.00    2.50
   2 -18  -6    6.10    4.20
  -2 -18   6    5.60    4.20
   2 -18  -6    3.10    4.90
   3 -18   6    3.10    6.20
  -3 -18  -6    1.00    3.40
   3 -18   6    2.10    1.90
  -3 -18  -6    0.20    3.60
  -3 -18  -6    0.00    2.30
   3 -18  -6   -0.60    5.10
   3 -18  -6    5.70    5.10
   3 -18  -6    5.70    4.10
  -3 -18   6   -3.10    4.10
  -3 -18   6    0.10    2.40
  -4 -18  -6    5.00    3.40
   4 -18   6    3.80    3.50
   4 -18   6    8.80    9.20
  -4 -18  -6    2.90    3.90
   4 -18  -6   -1.00    6.20
   4 -18  -6    2.50    3.80
   5  18  -6    5.40    5.90
   5 -18   6    7.90    3.50
  -5 -18  -6   11.50    4.00
   5 -18  -6    4.00    3.60
   6  18  -6    5.60    4.70
   6 -18   6    1.00    2.80
   6 -18  -6    1.00    2.90
   7  18  -6    4.80    3.60
   7 -18   6    1.50    2.30
   7 -18  -6    4.30    2.60
   0 -19  -6    1.40    1.80
   0 -19   6   -1.50    2.80
   0 -19  -6   -1.10    4.20
   0 -19  -6   -0.90    3.60
   0 -19   6   -0.50    3.80
   0 -19  -6    0.50    3.80
  -1 -19  -6   -0.20    3.80
   1 -19   6   -1.80    3.60
   1 -19   6    6.70    2.60
  -1 -19  -6    7.00    3.50
  -1 -19  -6    4.00    3.80
  -1 -19  -6    5.80    2.70
  -1 -19  -6    4.20    4.50
  -1 -19   6    4.40    4.00
  -1 -19   6    5.80    3.40
   1 -19  -6   -0.60    3.70
   1 -19  -6    3.80    4.50
   1 -19  -6   -1.80    3.30
  -2 -19  -6   18.40    3.50
  -2 -19  -6   18.40    4.20
   2 -19   6   14.90    2.50
   2 -19  -6   19.90    5.60
   2 -19  -6   14.80    4.40
  -2 -19   6   15.10    3.90
  -3 -19  -6   40.30    5.90
   3 -19  -6   41.40    6.50
   4 -19   6   -1.10    2.90
  -4 -19  -6    0.50    3.40
   4 -19   6   -2.00    7.60
   4 -19  -6   -2.20    3.20
   4 -19  -6   -4.50    6.20
  -5 -19  -6   20.20    3.80
   5  19  -6   22.00    6.40
   5 -19   6   12.20    3.30
   5 -19  -6   17.50    3.80
  -6 -19  -6    2.90    2.70
   6  19  -6    3.60    4.10
   6 -19   6    4.40    2.40
   6 -19  -6    5.60    2.70
   0 -20   6   22.90    4.10
   0 -20  -6    9.70    3.20
   0 -20   6    2.90    3.30
   0 -20  -6   24.10    5.30
  -1 -20  -6   12.00    3.30
  -1 -20  -6   26.10    3.20
  -1 -20  -6   19.60    5.00
   1 -20   6   23.80    3.60
   1 -20  -6   12.70    3.50
   1 -20  -6   24.10    5.50
  -1 -20   6   18.80    3.50
   2 -20   6    2.10    4.30
   2 -20   6   17.60    2.50
  -2 -20  -6   21.20    3.90
  -2 -20   6   13.80    3.50
   2 -20  -6    9.20    3.50
  -3 -20  -6   41.80    4.80
  -3 -20  -6   49.00    5.30
  -3 -20   6   45.00    5.40
   3 -20  -6   41.20    5.60
  -4 -20  -6    5.60    3.00
   4 -20  -6    2.70    3.10
   4 -20  -6    1.40    6.00
   5 -20   6    4.30    2.00
  -5 -20  -6    6.10    2.60
   5 -20  -6   13.20    3.20
   0 -21   6   -2.80    3.00
   0 -21  -6    0.50    2.40
   0 -21  -6    1.00    3.70
   0 -21   6    2.90    2.10
   0 -21  -6   -0.50    3.60
  -1 -21  -6    6.30    4.20
  -1 -21  -6    2.60    2.40
  -1 -21  -6   -3.00    3.50
   1 -21   6   -1.40    3.40
   1 -21   6   -0.60    1.40
   1 -21  -6    4.50    2.60
  -1 -21   6    4.20    2.40
  -1 -21   6    0.80    3.70
   1 -21  -6   -1.50    3.50
   2 -21   6    0.70    4.40
  -2 -21  -6    4.40    1.80
   2 -21  -6   36.90    4.50
   3 -21   6   -0.70    5.40
  -3 -21  -6   14.10    2.50
   3 -21  -6   13.60    3.40
  -3 -21   6   12.90    2.90
   0 -22   6   -1.20    3.40
   0 -22  -6    5.80    2.30
   0 -22   6    2.50    1.20
   0 -22  -6   -1.70    3.60
  -1 -22  -6   -1.60    4.00
  -1 -22  -6    4.50    2.00
   1 -22   6   -0.90    3.40
   1 -22  -6   -0.60    3.30
   1 -22  -6    2.70    2.00
  -1 -22   6    5.30    1.90
   2 -22   6   -2.10    3.70
  -2 -22  -6    0.90    2.00
   2 -22  -6    0.70    3.50
   2 -22  -6    4.30    2.30
  -2 -22   6    2.00    2.00
   0   0   7   -0.80    1.50
   0   0   7    0.10    1.50
   0   0  -7    0.70    1.50
   1   0  -7   84.79    4.50
   1   0  -7   81.99    4.40
   1   0   7   90.19    5.70
  -1   0   7   89.69    5.10
  -1   0  -7   87.69    4.80
   1   0   7   92.59    5.20
   2   0  -7    5.60    1.20
   2   0  -7    4.80    1.40
   2   0   7    2.20    1.80
   2   0   7    5.30    2.30
  -2   0  -7    7.80    2.00
  -2   0   7    5.50    1.60
   3   0  -7  228.38   10.50
  -3   0   7  234.78   11.00
   3   0  -7  240.68   10.40
   3   0   7  247.58   11.40
   3   0   7  238.68   11.90
   4   0  -7   14.90    2.30
   4   0   7   10.10    2.60
  -4   0   7   10.60    2.10
   4   0   7   14.90    2.70
   4   0   7   17.90    2.20
   4   0  -7   16.60    2.60
   5   0  -7   95.89    5.10
   5   0  -7   97.49    5.80
   5   0   7   94.79    6.70
   5   0   7   90.29    6.60
   5   0   7   99.49    5.20
   5   0  -7   88.99    4.70
   6   0  -7   54.79    3.70
   6   0   7   57.59    4.50
   6   0  -7   62.79    4.60
   6   0   7   63.09    6.20
   6   0   7   62.89    5.80
   7   0  -7    1.30    2.50
   7   0   7    0.80    2.60
   8   0   7   25.90    4.10
   8   0  -7   25.40    4.40
   9   0   7   74.09    7.00
   9   0   7   77.29    6.70
   9   0   7   77.29    5.80
   9   0   7   74.39    7.70
  10   0   7   -4.60    2.90
  10   0   7   -0.70    2.90
  10   0   7    3.00    2.20
  11   0   7    0.60    2.40
  11   0   7   -5.90    2.40
  12   0   7   -2.30    2.00
   0  -1  -7    0.60    1.40
   0  -1   7    1.70    1.60
   0  -1  -7    1.30    1.30
   0   1  -7   -0.50    1.50
   0  -1   7    0.40    1.50
   0   1   7    0.00    1.20
   1   1  -7   50.39    3.50
   1   1  -7   55.99    3.80
   1  -1   7   55.29    4.40
   1  -1   7   51.89    4.10
  -1  -1  -7   55.79    3.80
  -1   1   7   54.49    3.80
   1   1   7   60.09    4.50
  -1   1  -7   58.89    4.00
  -1  -1   7   57.29    4.40
   1   1   7   55.39    4.10
   1  -1  -7   50.99    3.20
  -2   1   7   17.20    2.60
   2   1  -7   14.90    2.70
   2   1  -7   15.40    2.10
  -2  -1  -7   22.40    3.30
   2  -1   7   15.90    2.60
   2  -1   7   14.80    2.50
   2   1  -7   15.90    2.20
   2  -1  -7   18.50    1.80
   2   1   7   12.20    2.30
  -2   1  -7   14.30    2.30
   2   1   7   16.00    3.40
  -2  -1   7   18.00    3.40
   3  -1   7   70.59    5.20
  -3  -1  -7   70.89    5.20
   3  -1   7   73.29    5.90
   3   1  -7   75.29    4.40
   3  -1   7   67.79    3.90
   3  -1  -7   75.69    4.20
   3  -1  -7   78.09    3.60
   3   1   7   71.79    5.80
   3   1   7   84.59    5.50
   3  -1  -7   75.59    3.70
  -3  -1   7   72.19    5.40
   4   1  -7  224.98    9.60
   4  -1   7  213.18   10.90
   4  -1   7  206.18    9.30
   4   1  -7  211.28    9.50
   4  -1   7  209.08   10.40
   4  -1  -7  206.58    9.50
  -4  -1   7  202.98   10.80
   4  -1  -7  207.28    8.80
   4  -1  -7  192.18    8.70
   4   1   7  196.18   10.80
   4   1   7  193.18    9.20
   4   1   7  202.48   10.40
   5   1  -7  149.59    7.10
   5  -1   7  170.28    8.80
   5   1  -7  158.48    8.10
   5   1  -7  143.99    7.30
   5  -1   7  153.88    8.80
   5   1  -7  158.58    7.80
   5  -1   7  160.68    7.60
   5  -1  -7  178.98    8.10
   5   1   7  156.68    9.20
   5  -1  -7  146.19    7.20
   5  -1  -7  155.58    6.90
   5   1   7  158.28    9.20
   6  -1   7   53.29    5.50
   6  -1   7   49.50    5.50
   6   1  -7   52.59    4.30
   6   1  -7   48.10    4.20
   6  -1   7   57.29    4.10
   6   1  -7   49.90    4.00
   6  -1  -7   58.79    4.70
   6   1   7   68.39    6.10
   6   1   7   46.40    6.40
   7   1  -7    8.40    2.60
   7  -1   7    5.70    2.20
   7  -1   7    4.20    3.00
   7   1   7    6.00    3.00
   7  -1  -7    5.90    2.60
   8  -1   7   19.20    3.60
   8   1  -7   17.90    3.40
   8   1   7   12.70    3.60
   8  -1  -7   13.70    3.10
   9  -1   7   25.10    4.50
   9  -1   7   25.90    3.80
   9  -1   7   25.90    4.00
   9   1  -7   19.20    5.10
   9  -1   7   32.50    5.70
   9   1   7   27.90    4.70
   9   1   7   20.90    3.40
   9   1   7   32.00    4.90
   9   1   7   30.90    4.50
  10  -1   7   -2.90    3.30
  10  -1   7    6.40    3.40
  10  -1   7   -0.50    2.00
  10   1   7    4.60    3.10
  10   1   7    0.90    3.40
  10   1   7    2.40    2.30
  10   1   7   -3.20    2.80
  11  -1   7   12.80    3.10
  11   1   7   11.40    2.10
  11   1   7   -3.10    2.50
  12  -1   7   -1.60    2.30
  12   1   7    0.70    2.30
   0  -2  -7  754.52   30.30
   0  -2   7  702.23   30.50
   0   2   7  763.72   30.60
   0  -2  -7  677.13   30.20
   0  -2   7  762.82   31.20
   0   2  -7  738.03   30.50
   1  -2   7   24.70    4.20
   1  -2   7   26.40    3.40
  -1  -2  -7   24.90    3.10
   1   2  -7   24.00    3.20
   1   2  -7   29.80    3.20
  -1   2   7   25.60    2.80
   1  -2  -7   24.50    2.10
  -1  -2   7   27.70    3.20
   1   2   7   30.40    3.40
  -1  -2   7   32.20    3.80
   1  -2  -7   30.50    2.20
   1   2   7   32.60    3.80
  -1   2  -7   29.00    3.10
   2   2  -7  279.07   12.20
  -2   2   7  254.17   11.70
   2  -2   7  276.67   13.00
   2  -2   7  271.17   12.50
  -2  -2  -7  279.17   12.40
   2   2  -7  268.77   11.80
   2  -2  -7  263.57   11.30
   2  -2  -7  286.27   11.30
   2   2   7  276.07   12.90
  -2  -2   7  286.97   13.20
  -2   2  -7  269.47   12.40
   2   2   7  271.37   12.60
   3  -2   7  217.78    9.60
   3  -2   7  211.68   11.10
   3  -2   7  218.78   10.60
   3   2  -7  236.18   10.40
   3   2  -7  212.58    9.80
  -3  -2   7  219.18   11.30
   3   2   7  207.38   11.00
   3  -2  -7  219.78    9.80
   3   2   7  230.58   10.80
   4   2  -7  829.62   36.10
   4  -2   7  874.11   36.80
   4   2  -7  928.91   36.30
   4  -2   7  852.81   36.00
   4   2  -7  896.81   36.50
   4  -2   7  872.41   36.80
   4  -2  -7  925.71   36.30
   4   2   7  897.01   37.10
   4   2   7  758.52   37.30
  -4  -2   7  880.41   37.80
   5  -2   7  123.29    7.40
   5   2  -7  127.59    6.70
   5   2  -7  120.09    6.70
   5  -2   7  120.89    6.30
   5   2  -7  117.19    5.90
   5   2  -7  112.09    6.50
   5  -2   7  123.49    7.30
  -5  -2   7  124.49    9.40
   5  -2  -7  132.59    6.70
   5   2   7  126.29    8.20
   5   2   7  117.89    8.10
   6   2  -7   42.50    4.00
   6  -2   7   43.80    3.90
   6   2  -7   46.20    3.80
   6  -2   7   50.79    5.20
   6   2  -7   46.20    4.20
   6   2  -7   50.39    4.50
   6  -2   7   49.50    5.40
   6   2  -7   47.30    3.30
   6   2   7   43.10    6.30
   6   2   7   58.79    6.20
   6  -2  -7   54.29    4.60
   7  -2   7   90.89    5.60
   7   2  -7   78.99    5.90
   7  -2   7   69.99    6.70
   7  -2  -7   73.49    5.90
   7   2   7   76.99    7.10
   8   2  -7   56.99    5.50
   8   2  -7   65.59   11.70
   8  -2   7   60.89    5.90
   8   2   7   70.59    7.00
   8  -2  -7   61.09    5.60
   9  -2   7   43.10    4.20
   9   2  -7   28.70    5.50
   9  -2   7   42.60   11.70
   9  -2   7   48.80    6.00
   9   2   7   35.60    5.40
   9   2   7   40.20    6.20
   9   2   7   35.30    5.00
   9   2   7   34.60    6.90
  10   2  -7   26.20    5.40
  10  -2   7   30.50    3.20
  10  -2   7   26.60    4.70
  10   2   7   24.10    4.50
  10   2   7   29.50    4.30
  10   2   7   29.20    5.90
  10   2   7   34.30    4.90
  11  -2   7   14.90    3.30
  11   2  -7   15.00    5.20
  11   2   7   18.80    2.90
  12  -2   7   -0.80    2.30
  12   2   7   -0.70    2.10
   0   3   7   69.69    4.40
   0  -3  -7   65.59    4.10
   0  -3   7   65.29    5.30
   0   3  -7   66.39    4.40
   0  -3  -7   68.29    4.00
   0  -3   7   60.49    4.40
  -1  -3  -7  126.89    6.60
   1  -3   7  134.99    7.00
   1   3  -7  134.69    6.10
   1   3  -7  134.79    6.80
  -1   3   7  145.09    6.30
   1   3  -7  132.89    6.80
   1  -3   7  150.78    8.00
   1   3   7  124.99    6.80
   1  -3  -7  117.39    5.90
  -1   3  -7  116.79    6.80
  -1  -3   7  118.49    6.70
  -1  -3   7  136.19    7.90
   1   3   7  131.09    7.20
   1  -3  -7  130.69    5.90
  -2  -3  -7 1018.60   41.70
   2   3  -7 1011.00   41.80
   2   3  -7  973.60   41.20
   2  -3   7  997.00   41.80
   2  -3   7 1022.80   42.40
   2   3   7 1002.80   42.20
   2   3   7  992.90   41.90
  -2  -3   7 1055.49   42.80
  -2   3  -7  974.00   41.70
   3   3  -7   47.30    3.60
  -3  -3  -7   49.80    4.50
   3   3  -7   44.50    4.20
   3  -3   7   43.40    5.20
   3  -3   7   43.00    4.40
   3  -3   7   46.30    3.20
   3  -3  -7   53.99    3.30
  -3  -3   7   43.80    5.40
   3   3   7   51.49    5.40
   3   3   7   44.40    4.70
   4  -3   7  319.27   14.60
   4   3  -7  329.87   14.50
   4  -3   7  312.97   13.70
   4  -3   7  293.27   14.40
   4   3  -7  313.37   13.90
   4   3  -7  299.27   14.10
   4   3   7  315.07   14.90
   4  -3  -7  331.57   13.90
   4   3   7  312.47   15.40
   5   3  -7    8.00    1.70
   5   3  -7    7.10    2.30
   5  -3   7    8.80    2.70
   5   3  -7    9.50    2.40
   5  -3   7    5.70    2.20
   5   3  -7    7.50    2.40
   5  -3   7    8.30    1.90
  -5  -3   7    0.60    3.40
   5  -3  -7    6.70    2.10
   5   3   7    5.50    2.90
   5   3   7    0.80    3.00
   6  -3   7   13.40    3.00
   6   3  -7   20.20    3.60
   6   3  -7   15.30    2.60
   6   3  -7   15.40    2.90
   6  -3   7   16.00    2.60
   6  -3   7   14.40    3.20
   6  -3  -7   21.20    3.20
   6   3   7   18.80    5.00
   6   3   7   17.50    3.60
   7   3  -7   16.60    2.60
   7   3  -7   11.80    2.90
   7  -3   7   14.90    3.30
   7  -3   7   15.90    2.90
   7   3   7   16.20    4.00
   7  -3  -7   15.70    3.30
   8   3  -7    3.50    4.00
   8  -3   7    5.80    2.60
   8   3  -7    0.60    2.60
   8  -3   7    0.80    2.40
   8  -3  -7    4.20    2.60
   8   3   7    3.50    3.30
   9  -3   7   22.70    3.70
   9  -3   7   22.00    8.70
   9   3  -7   17.90    2.40
   9  -3   7   20.90    4.40
   9   3  -7   15.40    4.70
   9   3   7   27.30    4.90
   9   3   7   20.70    3.50
   9   3   7   23.20    4.50
   9   3   7   15.30    4.30
  10  -3   7   40.20    3.20
  10   3  -7   42.70    7.80
  10  -3   7   44.40    6.00
  10   3   7   31.70    4.80
  10   3   7   42.50    6.90
  10   3   7   38.60    5.50
  11  -3   7    2.10    2.80
  11   3  -7   -0.80    2.90
  11  -3   7   -2.50    2.80
  11   3  -7    2.70    4.30
  11   3   7   10.70    4.40
  11   3   7   -2.20    2.60
  11   3   7    7.00    2.10
  12  -3   7    1.30    2.30
  12  -3   7    4.60    2.10
  12   3   7   -0.70    1.80
   0  -4   7  199.78    9.50
   0  -4  -7  200.18    8.80
   0   4   7  207.28    9.20
   0   4  -7  193.48    9.50
   0  -4   7  182.08   10.20
   0  -4  -7  176.18    8.90
  -1  -4  -7  182.98    8.60
   1   4  -7  170.48    8.80
  -1   4   7  193.68    8.20
   1  -4   7  183.28    9.70
   1  -4   7  186.78    8.90
   1   4  -7  166.18    7.90
   1  -4  -7  180.78    7.80
  -1  -4   7  164.68    8.70
  -1  -4   7  173.28   10.00
  -1   4  -7  166.68    8.60
   1   4   7  179.98    9.10
   2   4  -7   61.89    3.80
   2  -4   7   63.39    5.40
   2  -4   7   63.39    4.70
  -2  -4  -7   59.59    4.70
   2   4  -7   55.69    4.70
   2   4   7   54.29    4.90
  -2  -4   7   60.29    6.30
   2  -4  -7   51.89    3.40
  -3  -4  -7   45.20    4.70
   3  -4   7   44.60    3.30
   3   4  -7   39.70    4.30
   3  -4   7   46.80    4.30
   3   4  -7   49.30    3.60
  -3  -4   7   41.50    5.30
   3   4   7   37.80    5.20
   3  -4  -7   46.20    3.40
   4   4  -7  155.08    8.20
   4   4  -7  148.89    7.20
   4  -4   7  159.08    7.60
   4  -4   7  165.18    8.50
   4   4  -7  156.48    8.50
   4  -4   7  153.18    8.30
   4   4  -7  161.58    7.90
   4   4   7  153.98    9.70
   4   4   7  148.99    9.20
   4  -4  -7  160.28    7.70
   5  -4   7   71.79    5.60
   5  -4   7   74.39    5.80
   5   4  -7   79.69    5.70
   5  -4   7   80.89    5.00
   5   4  -7   82.19    5.90
   5   4  -7   76.29    5.20
   5  -4  -7   91.89    5.40
   5   4   7   73.99    6.90
  -5  -4   7   70.99    9.30
   5   4   7   72.79    7.10
   6   4  -7   19.20    3.30
   6  -4   7   20.40    3.30
   6   4  -7   22.70    3.10
   6   4  -7   22.80    4.10
   6  -4   7   17.30    3.30
   6  -4   7   22.80    3.40
   6   4   7   31.10    4.50
   6  -4  -7   28.30    3.60
   7  -4   7   18.80    3.40
   7   4  -7   19.50    3.30
   7   4  -7   14.60    2.90
   7  -4   7   17.30    2.90
   7   4  -7   16.20    2.90
   7   4   7   18.70    3.90
   7  -4  -7   12.10    2.80
   8   4  -7   89.19    6.50
   8  -4   7   92.89    6.40
   8  -4   7   85.09    5.90
   8  -4   7   74.19    7.50
   8   4  -7   67.89    8.80
   8   4   7   89.69    8.20
   8  -4  -7   82.59    6.40
   8   4   7   92.99    8.20
   9  -4   7    5.70    7.00
   9   4  -7    2.80    5.50
   9  -4   7    8.20    2.10
   9   4  -7    9.60    2.10
   9  -4   7    5.30    3.90
   9   4  -7    4.60    4.40
   9   4   7    1.60    2.90
   9   4   7   10.50    4.00
   9   4   7   10.70    3.40
   9   4   7    8.80    3.80
  10   4  -7   -0.30    4.10
  10  -4   7    3.60    3.40
  10  -4   7   -3.50    3.00
  10   4  -7    1.00    4.30
  10   4   7    3.10    2.70
  10   4   7   -0.60    2.70
  10   4   7    3.70    3.50
  11   4  -7   16.30    4.90
  11  -4   7   22.00    3.70
  11   4   7   23.10    4.10
  11   4   7   17.30    4.80
  11   4   7   18.10    3.50
  12   4  -7    1.90    3.60
  12   4  -7   -0.40    2.20
  12  -4   7    2.30    2.30
  12  -4   7    2.30    2.00
  12   4   7    8.30    4.30
  12   4   7   -0.20    1.40
   0  -5  -7   44.60    3.60
   0  -5   7   43.80    5.20
   0   5  -7   46.90    4.30
   0  -5   7   46.20    4.50
  -1  -5  -7   90.49    5.40
   1  -5   7   90.69    5.60
   1  -5   7   95.39    7.10
   1   5  -7   87.79    5.60
  -1   5   7   91.79    4.90
   1   5  -7   93.19    4.70
   1  -5  -7   75.59    4.40
   1  -5  -7   83.79    4.40
  -1  -5   7   76.89    5.60
  -1  -5   7   85.69    6.90
  -1   5  -7   81.59    6.50
   2   5  -7   84.29    5.70
  -2  -5  -7   74.99    5.30
   2  -5   7   78.99    5.40
   2   5  -7   77.19    4.30
   2  -5   7   83.79    6.20
  -2  -5   7   71.19    7.20
   2  -5  -7   68.09    3.90
   3  -5   7   45.00    4.40
  -3  -5  -7   54.69    4.90
   3   5  -7   42.20    4.70
   3   5  -7   49.30    3.70
   3  -5   7   44.50    4.40
   3   5  -7   40.70    4.60
  -3  -5   7   46.60    6.30
   3  -5  -7   41.30    3.30
   3   5   7   45.20    5.50
   4  -5   7   99.69    5.40
   4  -5   7   99.29    6.40
   4  -5   7   87.79    6.20
   4   5  -7   95.89    6.60
   4   5  -7   94.89    6.50
   4   5  -7  107.09    5.90
   4   5   7  100.89    7.40
   4   5   7   93.49    7.60
   4  -5  -7  111.49    5.70
   5  -5   7  106.39    6.70
   5   5  -7   97.89    6.60
   5   5  -7  104.99    5.90
   5   5  -7   97.19    7.00
   5  -5   7   95.79    6.60
   5  -5   7  105.29    5.80
   5   5   7   88.19    7.60
  -5  -5   7   84.59   10.50
   5   5   7   95.39    7.80
   5  -5  -7  105.59    5.90
   6   5  -7   33.80    3.90
   6  -5   7   34.30    4.70
   6  -5   7   33.50    3.50
   6   5  -7   36.90    4.90
   6   5   7   25.70    4.20
   6  -5  -7   36.00    4.20
   7  -5   7   12.80    2.90
   7   5  -7    4.20    2.70
   7   5  -7    8.30    2.90
   7  -5   7    9.90    2.60
   7   5   7    5.90    3.70
   7  -5  -7    5.60    2.70
   8   5  -7   58.49    5.00
   8   5  -7   61.89    5.90
   8   5  -7   76.09    8.50
   8  -5   7   63.79    7.00
   8   5  -7   58.79    5.20
   8  -5   7   63.69    5.40
   8  -5   7   59.99    5.70
   8  -5  -7   72.89    5.60
   8   5   7   55.09    7.50
   8   5   7   67.89    7.90
   8   5   7   58.89    5.80
   9  -5   7    2.90    1.70
   9   5  -7    1.30    5.40
   9   5  -7    4.60    4.50
   9   5  -7    2.80    2.10
   9  -5   7    5.70    7.00
   9  -5   7    2.30    3.80
   9   5   7    5.40    3.80
   9   5   7    7.00    4.00
   9   5   7    0.80    3.10
   9   5   7    2.60    3.00
  10  -5   7   20.50    4.10
  10   5  -7   19.50    5.00
  10   5   7   19.20    4.00
  10   5   7   25.60    4.70
  11   5  -7    1.10    2.90
  11  -5   7    0.00    2.60
  11  -5   7   -0.40    2.70
  11   5  -7   -3.20    4.20
  11   5   7   12.80    4.40
  11   5   7    0.60    2.00
  11   5   7    0.70    2.80
  11   5   7   -0.90    1.70
  12  -5   7    2.80    2.40
  12   5  -7   13.60    4.00
  12  -5   7    7.50    2.10
  12   5  -7   -0.70    2.00
  12   5   7   -0.30    1.10
   0  -6   7   17.20    3.40
   0   6  -7   22.30    3.50
   0  -6   7   24.90    4.20
   0  -6  -7   18.80    2.90
   0   6  -7   21.40    3.20
   1  -6   7   41.50    5.20
   1  -6   7   34.20    4.20
   1   6  -7   40.20    4.10
   1   6  -7   40.90    3.00
  -1  -6  -7   36.50    3.90
  -1  -6   7   41.00    5.70
   1  -6  -7   39.10    2.90
  -1  -6   7   35.30    4.20
   2  -6   7   26.80    3.90
   2  -6   7   16.00    5.10
  -2  -6  -7   28.80    3.90
   2   6  -7   28.30    2.90
   2   6  -7   34.20    4.40
  -2  -6   7   30.20    6.10
  -3  -6  -7   37.90    5.00
   3  -6   7   46.40    4.60
   3   6  -7   42.10    5.00
   3   6  -7   46.60    4.90
   3  -6   7   48.70    4.50
  -3  -6  -7   46.10    5.00
   3   6  -7   50.49    3.80
   3  -6  -7   41.90    3.30
  -3  -6   7   54.89    5.00
  -4  -6  -7   14.40    3.20
   4   6  -7   18.10    3.10
   4  -6   7   19.80    2.80
   4  -6   7   18.20    2.90
   4  -6   7   19.20    3.10
   4   6  -7   22.70    3.60
   4   6  -7   20.50    3.40
   4  -6  -7   22.40    3.00
   4   6   7    9.70    3.00
   4   6   7   16.70    3.80
   5  -6   7    5.50    2.50
   5   6  -7    5.60    2.60
   5  -6   7    6.30    2.50
   5  -6   7    6.60    2.20
   5   6  -7    5.60    2.00
   5   6  -7    5.20    2.80
   5  -6  -7    4.30    2.10
  -5  -6   7    1.40    5.30
   5   6   7    7.90    3.50
   5   6   7    8.40    3.00
   6   6  -7    7.30    2.80
   6  -6   7    3.00    2.10
   6   6  -7    6.70    2.60
   6  -6   7    6.80    2.50
   6  -6  -7    6.60    2.50
   6   6   7    4.00    3.40
   7  -6   7   56.49    5.00
   7   6  -7   60.39    5.80
   7   6  -7   48.00    5.10
   7  -6   7   53.99    4.90
   7   6   7   48.30    7.20
   7  -6  -7   51.89    5.20
   8   6  -7   26.80    5.70
   8   6  -7   37.50    5.00
   8  -6   7   30.50    8.70
   8  -6   7   26.50    5.00
   8   6  -7   32.30    4.30
   8  -6   7   29.80    4.50
   8  -6   7   37.00    3.70
   8   6  -7   31.20    5.40
   8   6  -7   33.60    4.80
   8   6   7   34.30    7.10
   8   6   7   35.50    5.70
   8  -6  -7   32.60    4.80
   9   6  -7    5.00    2.30
   9   6  -7   -2.00    4.30
   9  -6   7    1.90    3.80
   9  -6   7    3.50    6.80
   9   6  -7    4.80    4.40
   9   6   7    2.00    3.20
   9   6   7    0.20    2.70
   9   6   7    8.50    3.90
   9   6   7    4.90    4.10
  10  -6   7   23.50    4.30
  10   6  -7   18.30    2.30
  10   6  -7   24.70    5.50
  10   6   7   17.60    3.20
  10   6   7   19.20    4.00
  11   6  -7    4.50    4.20
  11   6  -7    0.40    2.40
  11  -6   7    2.10    2.80
  11  -6   7    6.30    2.90
  11   6   7    4.60    2.90
  11   6   7    4.80    2.20
  11   6   7   11.30    4.40
  11   6   7   -0.10    1.50
   0  -7   7  248.08   12.20
   0  -7  -7  245.98   11.30
   0  -7   7  249.18   13.50
   1  -7   7  254.37   13.30
  -1  -7  -7  237.18   11.50
  -1  -7  -7  220.08   11.30
   1  -7   7  245.28   11.80
   1   7  -7  233.28   10.80
  -1  -7   7  250.87   13.80
   1  -7  -7  249.08   10.70
  -1  -7   7  232.08   12.20
  -2  -7  -7  122.79    7.30
   2   7  -7  120.69    6.20
   2   7  -7  134.39    7.80
  -2  -7  -7  114.69    7.20
   2  -7   7  123.09    7.10
   2  -7   7  122.99    7.20
  -2  -7   7  124.99    9.60
   2  -7  -7  115.49    5.30
   2  -7  -7  115.69    5.30
   3  -7   7   10.00    2.50
  -3  -7  -7   16.90    3.20
   3  -7   7   11.20    2.70
   3   7  -7    8.40    2.70
  -3  -7  -7    9.60    2.80
   3   7  -7    7.90    2.80
  -3  -7  -7    9.90    1.90
   3   7  -7   12.40    2.30
   3  -7  -7    9.60    1.60
   3  -7  -7   11.20    1.80
   4  -7   7    5.80    2.40
   4  -7   7    7.60    2.60
   4   7  -7    7.00    2.20
   4   7  -7    9.10    3.00
   4   7  -7    4.50    2.60
  -4  -7  -7    6.80    2.90
  -4  -7  -7    4.90    1.70
   4  -7  -7    5.10    1.90
   4   7   7    5.20    2.80
   5  -7   7   29.40    4.30
   5   7  -7   32.10    5.00
   5   7  -7   31.30    3.50
   5  -7   7   34.30    4.50
   5   7  -7   37.00    5.20
   5   7   7   35.80    5.90
   5   7   7   32.70    5.80
  -5  -7   7   33.30    7.70
   5  -7  -7   31.20    3.70
   6   7  -7   18.10    3.20
   6  -7   7   20.00    3.10
   6  -7   7   19.00    3.10
   6   7  -7   14.90    3.50
   6  -7  -7   15.30    2.80
   6   7   7   13.50    4.10
  -6  -7   7   18.50    7.70
   7  -7   7    3.10    2.40
   7   7  -7    5.10    2.80
   7   7  -7    2.50    2.80
   7   7  -7    9.20    6.60
   7  -7  -7    6.70    2.70
   7   7   7    3.60    3.80
   8   7  -7    3.80    3.00
   8   7  -7   -1.30    4.00
   8   7  -7    0.60    3.70
   8  -7   7    5.50    4.10
   8  -7   7    4.90    1.80
   8   7  -7    1.80    2.50
   8   7  -7   -2.40    2.50
   8  -7   7    5.70    6.80
   8   7  -7    4.10    2.80
   8   7   7    0.40    3.60
   8  -7  -7    4.60    2.80
   8   7   7    2.90    4.30
   8   7   7    5.80    3.20
   9  -7   7   13.80    4.50
   9   7  -7   -1.80    4.10
   9   7  -7    8.30    3.10
   9   7  -7   15.10    4.90
   9   7  -7   10.10    2.60
   9  -7   7   18.20    8.20
   9   7   7   11.40    3.60
   9   7   7    9.80    3.90
  -9   7  -7   11.90    5.50
   9   7   7   20.90    5.10
  10   7  -7   48.40    7.40
  10   7  -7   46.00    3.40
  10  -7   7   49.99    5.90
  10   7   7   53.49    6.80
  10   7   7   39.60    5.10
  11  -7   7    4.90    2.80
  11  -7   7    3.30    2.70
  11   7  -7    0.40    2.20
  11   7  -7    4.50    3.80
  11   7   7    2.00    2.80
  11   7   7    0.40    2.00
  11   7   7    7.40    4.00
  11   7   7    8.20    2.30
   0  -8  -7   65.09    4.00
   0  -8   7   71.19    7.60
   0  -8   7   67.59    5.80
   0  -8  -7   67.59    4.80
   0  -8  -7   75.99    4.70
   0  -8   7   73.39    5.90
  -1  -8  -7  331.87   15.10
  -1  -8  -7  350.26   15.80
   1  -8   7  360.66   16.40
   1   8  -7  371.56   15.60
   1  -8   7  373.16   16.50
  -1  -8  -7  350.96   16.00
   1  -8  -7  343.67   15.10
  -1  -8   7  348.97   18.30
   1  -8  -7  380.96   15.40
   1  -8  -7  333.17   15.00
   2  -8   7  117.19    7.10
  -2  -8  -7  121.29    7.30
  -2  -8  -7  111.89    5.80
   2  -8   7  116.49    7.10
  -2  -8  -7  112.59    7.20
   2   8  -7  109.39    6.20
   2   8  -7  122.19    8.10
   2  -8  -7  109.09    5.30
   2  -8  -7  117.89    5.70
  -2  -8   7  122.69    9.80
   4   8  -7   -0.20    2.70
   4   8  -7    2.00    1.90
  -4  -8  -7    0.70    2.70
   4  -8   7    0.70    2.20
   4  -8   7    2.30    2.30
  -4  -8  -7    0.10    1.60
   4  -8  -7   -0.40    1.60
  -4  -8   7  -16.10    7.10
   5   8  -7   10.40    3.60
   5   8  -7   16.90    3.50
   5   8  -7   14.90    2.90
   5  -8   7   15.40    2.90
   5   8   7    5.10    4.90
   5   8   7   13.00    3.50
  -5  -8   7   14.50    7.80
   5  -8  -7   13.70    2.60
   6   8  -7   19.60    3.20
   6  -8   7   24.90    4.00
   6   8  -7   23.80    4.20
  -6  -8   7   23.70    8.60
   6  -8  -7   13.30    2.80
   6   8   7   20.80    4.40
   7   8  -7   -0.70    2.50
   7   8  -7    6.60    3.20
   7  -8   7   -2.20    3.60
   7   8  -7    5.40    4.20
   7   8   7    7.10    4.30
   7  -8  -7    2.60    2.50
   7  -8  -7    3.40    3.50
   8   8  -7   49.00    5.10
   8  -8   7   50.59   10.50
   8   8  -7   47.40    6.00
   8  -8   7   51.49    6.80
   8   8  -7   47.10    6.20
   8  -8   7   45.40    3.20
   8   8  -7   54.69    8.20
   8   8   7   50.99    7.00
   8   8   7   40.00    7.20
   9  -8   7   11.80    4.30
   9   8  -7   15.90    3.10
   9   8  -7   21.30    3.50
   9  -8   7   15.50    7.90
   9   8  -7   15.70    5.10
   9   8  -7   14.00    2.90
   9   8   7   20.70    4.10
   9   8   7   17.20    4.70
   9   8   7   13.10    4.00
  10   8  -7   29.80    3.20
  10   8  -7   26.80    5.00
  10  -8   7   29.80    5.50
  10   8   7   31.90    6.40
  10   8   7   22.40    4.50
  11  -8   7    6.80    2.80
  11   8  -7    9.60    3.70
  11   8   7   15.40    4.20
  11   8   7   12.00    3.10
  11   8   7    9.80    2.40
   0  -9  -7   74.49    4.50
   0  -9  -7   84.59    5.10
   0  -9   7   80.59    6.30
   0  -9   7   81.19    6.40
   0  -9  -7   84.49    5.40
   0  -9   7   82.99    8.20
   1  -9   7  162.28    9.00
  -1  -9  -7  157.98    8.20
  -1  -9  -7  150.38    7.40
  -1  -9  -7  154.38    8.60
   1   9  -7  154.58    7.80
   1  -9   7  160.88    8.90
   1  -9  -7  150.38    7.30
  -1  -9   7  163.08    9.10
  -1  -9   7  153.48   10.80
   1  -9  -7  151.28    7.40
   1  -9  -7  162.98    7.80
  -2  -9  -7    3.20    2.60
  -2  -9  -7    2.10    1.70
   2  -9   7    2.40    2.30
  -2  -9  -7    2.60    2.40
   2   9  -7    2.20    1.80
[truncated: 932,451 more chars]
