# Supplementary material for: Catalytic diastereo- and enantioselective additions of versatile allyl groups to N–H ketimines
Source: Springer Nature journal article supplement (doi:10.1038/nchem.2816), 2017-07-17
Supplement: 41557_2017_BFnchem2816_MOESM81_ESM.mol [file 41557_2017_BFnchem2816_MOESM81_ESM.mol]

nchem.2816-comp3y.mol
  ChemDraw06211715122D

 33 34  0  0  1  0  0  0  0  0999 V2000
   -1.7855   -0.6881    0.0000 C   0  0  0  0  0  0  0  0  0  0  0  0
   -1.0710   -0.2756    0.0000 C   0  0  0  0  0  0  0  0  0  0  0  0
   -0.3566   -0.6881    0.0000 C   0  0  0  0  0  0  0  0  0  0  0  0
   -0.3566   -1.5131    0.0000 C   0  0  0  0  0  0  0  0  0  0  0  0
    0.3579   -0.2756    0.0000 C   0  0  0  0  0  0  0  0  0  0  0  0
    1.0724   -0.6881    0.0000 C   0  0  0  0  0  0  0  0  0  0  0  0
   -1.5660    0.4388    0.0000 N   0  0  0  0  0  0  0  0  0  0  0  0
    0.3579   -1.9256    0.0000 C   0  0  0  0  0  0  0  0  0  0  0  0
   -2.5000   -0.2756    0.0000 C   0  0  0  0  0  0  0  0  0  0  0  0
   -3.2144   -0.6881    0.0000 C   0  0  0  0  0  0  0  0  0  0  0  0
   -3.2144   -1.5131    0.0000 C   0  0  0  0  0  0  0  0  0  0  0  0
   -2.5000   -1.9256    0.0000 C   0  0  0  0  0  0  0  0  0  0  0  0
   -1.7855   -1.5131    0.0000 C   0  0  0  0  0  0  0  0  0  0  0  0
   -0.3095    1.0343    0.0000 O   0  0  0  0  0  0  0  0  0  0  0  0
    0.3579    0.5494    0.0000 B   0  0  0  0  0  0  0  0  0  0  0  0
    1.0253    1.0343    0.0000 O   0  0  0  0  0  0  0  0  0  0  0  0
    0.7704    1.8189    0.0000 C   0  0  0  0  0  0  0  0  0  0  0  0
   -0.0546    1.8189    0.0000 C   0  0  0  0  0  0  0  0  0  0  0  0
   -0.8083    2.1545    0.0000 C   0  0  0  0  0  0  0  0  0  0  0  0
   -0.1408    2.6394    0.0000 C   0  0  0  0  0  0  0  0  0  0  0  0
    0.8566    2.6394    0.0000 C   0  0  0  0  0  0  0  0  0  0  0  0
    1.5241    2.1545    0.0000 C   0  0  0  0  0  0  0  0  0  0  0  0
   -0.8647    0.4388    0.0000 C   0  0  0  0  0  0  0  0  0  0  0  0
   -1.4362    1.0330    0.0000 C   0  0  0  0  0  0  0  0  0  0  0  0
   -0.0643    0.6367    0.0000 C   0  0  0  0  0  0  0  0  0  0  0  0
    1.0724   -1.5131    0.0000 O   0  0  0  0  0  0  0  0  0  0  0  0
    1.7864   -1.9254    0.0000 Si  0  0  0  0  0  0  0  0  0  0  0  0
    2.5004   -1.5131    0.0000 C   0  0  0  0  0  0  0  0  0  0  0  0
    1.3742   -2.6394    0.0000 C   0  0  0  0  0  0  0  0  0  0  0  0
    2.1986   -2.6394    0.0000 C   0  0  0  0  0  0  0  0  0  0  0  0
    2.5004   -0.6887    0.0000 C   0  0  0  0  0  0  0  0  0  0  0  0
    3.2144   -1.1009    0.0000 C   0  0  0  0  0  0  0  0  0  0  0  0
    3.2144   -1.9254    0.0000 C   0  0  0  0  0  0  0  0  0  0  0  0
 23 24  1  0      
 23 25  1  0      
  2 23  1  1      
 28 31  1  0      
 28 32  1  0      
 28 33  1  0      
 27 28  1  0      
 27 29  1  0      
 27 30  1  0      
 26 27  1  0      
  8 26  1  0      
  1  2  1  0      
  2  3  1  0      
  3  4  1  6      
  3  5  1  0      
  5 15  1  0      
  5  6  2  0      
  2  7  1  6      
  4  8  1  0      
  1  9  2  0      
  9 10  1  0      
 10 11  2  0      
 11 12  1  0      
 12 13  2  0      
 13  1  1  0      
 14 15  1  0      
 15 16  1  0      
 16 17  1  0      
 17 18  1  0      
 14 18  1  0      
 18 19  1  0      
 18 20  1  0      
 17 21  1  0      
 17 22  1  0      
M  STY  1   1 SUP
M  SLB  1   1   1
M  SAL   1  3  23  24  25
M  SBL   1  1   3
M  SMT   1 i-Pr
M  SBV   1   3   -0.2064   -0.7145
M  STY  1   2 SUP
M  SLB  1   2   2
M  SAL   2  8  26  27  28  29  30  31  32  33
M  SBL   2  1  11
M  SMT   2 OTBS
M  SBV   2  11   -0.7145   -0.4125
M  END
