# Supplementary material for: Catalytic diastereo- and enantioselective additions of versatile allyl groups to N–H ketimines
Source: Springer Nature journal article supplement (doi:10.1038/nchem.2816), 2017-07-17
Supplement: 41557_2017_BFnchem2816_MOESM92_ESM.cif [file 41557_2017_BFnchem2816_MOESM92_ESM.cif]

 
data_C13H19NO2
 
_audit_creation_method            'SHELXL-2014/7'
_shelx_SHELXL_version_number      '2014/7'
_chemical_name_systematic         ?
_chemical_name_common             ?
_chemical_melting_point           ?
_chemical_formula_moiety          'C13 H19 N O2'
_chemical_formula_sum
 'C13 H19 N O2' 
_chemical_formula_weight          221.29

loop_
 _atom_type_symbol
 _atom_type_description
 _atom_type_scat_dispersion_real
 _atom_type_scat_dispersion_imag
 _atom_type_scat_source
 'C'  'C'   0.0181   0.0091
 'International Tables Vol C Tables 4.2.6.8 and 6.1.1.4'
 'H'  'H'   0.0000   0.0000
 'International Tables Vol C Tables 4.2.6.8 and 6.1.1.4'
 'N'  'N'   0.0311   0.0180
 'International Tables Vol C Tables 4.2.6.8 and 6.1.1.4'
 'O'  'O'   0.0492   0.0322
 'International Tables Vol C Tables 4.2.6.8 and 6.1.1.4'
 
_space_group_crystal_system       orthorhombic
_space_group_IT_number            19
_space_group_name_H-M_alt         'P 21 21 21'
_space_group_name_Hall            'P 2ac 2ab'
 
_shelx_space_group_comment
;
The symmetry employed for this shelxl refinement is uniquely defined
by the following loop, which should always be used as a source of
symmetry information in preference to the above space-group names.
They are only intended as comments.
;
 
loop_
 _space_group_symop_operation_xyz
 'x, y, z'
 '-x+1/2, -y, z+1/2'
 '-x, y+1/2, -z+1/2'
 'x+1/2, -y+1/2, -z'
 
_cell_length_a                    7.8093(10)
_cell_length_b                    11.0945(15)
_cell_length_c                    14.1156(19)
_cell_angle_alpha                 90
_cell_angle_beta                  90
_cell_angle_gamma                 90
_cell_volume                      1223.0(3)
_cell_formula_units_Z             4
_cell_measurement_temperature     100(2)
_cell_measurement_reflns_used     7511
_cell_measurement_theta_min       3.13
_cell_measurement_theta_max       66.97
 
_exptl_crystal_description        cube
_exptl_crystal_colour             colorless
_exptl_crystal_density_meas       'not measured' 
_exptl_crystal_density_method     none
_exptl_crystal_density_diffrn     1.202          
_exptl_crystal_F_000              480
_exptl_transmission_factor_min    ?
_exptl_transmission_factor_max    ?
_exptl_crystal_size_max           0.440
_exptl_crystal_size_mid           0.320
_exptl_crystal_size_min           0.250
_exptl_absorpt_coefficient_mu     0.642
_shelx_estimated_absorpt_T_min    0.765
_shelx_estimated_absorpt_T_max    0.856
_exptl_absorpt_correction_type    'multi-scan' 
_exptl_absorpt_correction_T_min   0.6456
_exptl_absorpt_correction_T_max   0.7528
_exptl_absorpt_process_details
;
Sheldrick, G.M. (2013). SADABS. Bruker AXS Inc. Madison, WI USA.
;
_exptl_absorpt_special_details    ?
_diffrn_ambient_temperature       100(2)
_diffrn_radiation_wavelength      1.54178
_diffrn_radiation_type            CuK\a
_diffrn_source                    'microfocus sealed tube'
_diffrn_source_type               'Incoatec I\uS'
_diffrn_radiation_monochromator   mirrors 
_diffrn_measurement_device_type   'Bruker Kappa DUO CCD diffractometer'
_diffrn_measurement_method        '\f and \w scans'  
_diffrn_detector_area_resol_mean  ?
_diffrn_reflns_number             8468
_diffrn_reflns_av_unetI/netI      0.0240
_diffrn_reflns_av_R_equivalents   0.0326
_diffrn_reflns_limit_h_min        -9
_diffrn_reflns_limit_h_max        9
_diffrn_reflns_limit_k_min        -13
_diffrn_reflns_limit_k_max        13
_diffrn_reflns_limit_l_min        -16
_diffrn_reflns_limit_l_max        16
_diffrn_reflns_theta_min          5.070
_diffrn_reflns_theta_max          66.891
_diffrn_reflns_theta_full         66.891
_diffrn_measured_fraction_theta_max   0.988
_diffrn_measured_fraction_theta_full  0.988
_diffrn_reflns_Laue_measured_fraction_max    0.988
_diffrn_reflns_Laue_measured_fraction_full   0.988
_diffrn_reflns_point_group_measured_fraction_max   0.988
_diffrn_reflns_point_group_measured_fraction_full  0.988
_reflns_number_total              2150
_reflns_number_gt                 2148
_reflns_threshold_expression      'I > 2\s(I)'
_reflns_Friedel_coverage          0.704
_reflns_Friedel_fraction_max      0.988
_reflns_Friedel_fraction_full     0.988
 
_reflns_special_details
;
 Reflections were merged by SHELXL according to the crystal
 class for the calculation of statistics and refinement.
 
 _reflns_Friedel_fraction is defined as the number of unique
 Friedel pairs measured divided by the number that would be
 possible theoretically, ignoring centric projections and
 systematic absences.
;
 
_computing_data_collection        'APEX2 (Bruker, 2014)'
_computing_cell_refinement        'SAINT (Bruker, 2014)'
_computing_data_reduction         'SAINT (Bruker, 2014)'
_computing_structure_solution     'SHELXL-2014 (Sheldrick, 2014)'
_computing_structure_refinement   'SHELXL-2014 (Sheldrick, 2014)'
_computing_molecular_graphics     'Bruker SHELXTL'
_computing_publication_material   'Bruker SHELXTL'
_refine_special_details           ?
_refine_ls_structure_factor_coef  Fsqd
_refine_ls_matrix_type            full
_refine_ls_weighting_scheme       calc
_refine_ls_weighting_details
'w=1/[\s^2^(Fo^2^)+(0.0420P)^2^+0.2574P] where P=(Fo^2^+2Fc^2^)/3'
_atom_sites_solution_primary      direct
_atom_sites_solution_secondary    difmap
_atom_sites_solution_hydrogens    mixed
_refine_ls_hydrogen_treatment     mixed
_refine_ls_extinction_method      none
_refine_ls_extinction_coef        na
_refine_ls_abs_structure_details
;
 Flack x determined using 882 quotients [(I+)-(I-)]/[(I+)+(I-)]
 (Parsons, Flack and Wagner, Acta Cryst. B69 (2013) 249-259).
;
_refine_ls_abs_structure_Flack    -0.01(6)
_chemical_absolute_configuration  ad
_refine_ls_number_reflns          2150
_refine_ls_number_parameters      159
_refine_ls_number_restraints      2
_refine_ls_R_factor_all           0.0301
_refine_ls_R_factor_gt            0.0301
_refine_ls_wR_factor_ref          0.0793
_refine_ls_wR_factor_gt           0.0792
_refine_ls_goodness_of_fit_ref    1.097
_refine_ls_restrained_S_all       1.097
_refine_ls_shift/su_max           0.000
_refine_ls_shift/su_mean          0.000
 
loop_
 _atom_site_label
 _atom_site_type_symbol
 _atom_site_fract_x
 _atom_site_fract_y
 _atom_site_fract_z
 _atom_site_U_iso_or_equiv
 _atom_site_adp_type
 _atom_site_occupancy
 _atom_site_site_symmetry_order  
 _atom_site_calc_flag
 _atom_site_refinement_flags_posn
 _atom_site_refinement_flags_adp
 _atom_site_refinement_flags_occupancy
 _atom_site_disorder_assembly
 _atom_site_disorder_group
O1 O 0.87402(18) 0.29344(15) 0.07351(10) 0.0309(4) Uani 1 1 d . . . . .
H3N H 0.969(4) 0.275(3) 0.088(2) 0.046(8) Uiso 1 1 d . . . . .
O2 O 0.55987(19) 0.55116(11) 0.24954(10) 0.0307(4) Uani 1 1 d . . . . .
N1 N 0.22293(19) 0.25617(15) 0.12105(12) 0.0201(4) Uani 1 1 d D . . . .
H1N H 0.273(3) 0.255(2) 0.0661(15) 0.030(6) Uiso 1 1 d D . . . .
H2N H 0.255(3) 0.1898(19) 0.1491(16) 0.029(6) Uiso 1 1 d D . . . .
C1 C 0.7642(2) 0.29782(19) 0.15341(14) 0.0253(4) Uani 1 1 d . . . . .
H1A H 0.8158 0.3491 0.2032 0.030 Uiso 1 1 calc R U . . .
H1B H 0.7489 0.2157 0.1796 0.030 Uiso 1 1 calc R U . . .
C2 C 0.5929(2) 0.34877(17) 0.12449(12) 0.0195(4) Uani 1 1 d . . . . .
H2A H 0.5437 0.2987 0.0732 0.023 Uiso 1 1 calc R U . . .
H2B H 0.6088 0.4315 0.0996 0.023 Uiso 1 1 calc R U . . .
C3 C 0.4684(2) 0.35203(15) 0.20815(12) 0.0157(4) Uani 1 1 d . . . . .
H3 H 0.4811 0.2737 0.2425 0.019 Uiso 1 1 calc R U . . .
C4 C 0.2742(2) 0.36252(16) 0.17751(12) 0.0167(4) Uani 1 1 d . . . . .
C5 C 0.1650(2) 0.36274(15) 0.26747(12) 0.0159(3) Uani 1 1 d . . . . .
C6 C 0.1429(2) 0.25597(16) 0.31846(12) 0.0199(4) Uani 1 1 d . . . . .
H6 H 0.1923 0.1835 0.2953 0.024 Uiso 1 1 calc R U . . .
C7 C 0.0504(2) 0.25385(17) 0.40197(13) 0.0247(4) Uani 1 1 d . . . . .
H7 H 0.0361 0.1801 0.4352 0.030 Uiso 1 1 calc R U . . .
C8 C -0.0218(2) 0.3589(2) 0.43749(13) 0.0269(4) Uani 1 1 d . . . . .
H8 H -0.0840 0.3577 0.4953 0.032 Uiso 1 1 calc R U . . .
C9 C -0.0021(3) 0.46517(18) 0.38770(14) 0.0258(4) Uani 1 1 d . . . . .
H9 H -0.0519 0.5373 0.4113 0.031 Uiso 1 1 calc R U . . .
C10 C 0.0899(2) 0.46761(16) 0.30330(13) 0.0205(4) Uani 1 1 d . . . . .
H10 H 0.1018 0.5413 0.2697 0.025 Uiso 1 1 calc R U . . .
C11 C 0.5190(2) 0.45171(16) 0.27764(13) 0.0194(4) Uani 1 1 d . . . . .
C12 C 0.5216(3) 0.4223(2) 0.38079(14) 0.0298(5) Uani 1 1 d . . . . .
H12A H 0.6104 0.3619 0.3932 0.045 Uiso 1 1 calc R U . . .
H12B H 0.4098 0.3903 0.3997 0.045 Uiso 1 1 calc R U . . .
H12C H 0.5464 0.4955 0.4172 0.045 Uiso 1 1 calc R U . . .
C13 C 0.2437(2) 0.47323(17) 0.11555(14) 0.0244(4) Uani 1 1 d . . . . .
H13A H 0.3038 0.4633 0.0551 0.037 Uiso 1 1 calc R U . . .
H13B H 0.2871 0.5451 0.1480 0.037 Uiso 1 1 calc R U . . .
H13C H 0.1207 0.4824 0.1038 0.037 Uiso 1 1 calc R U . . .
 
loop_
 _atom_site_aniso_label
 _atom_site_aniso_U_11
 _atom_site_aniso_U_22
 _atom_site_aniso_U_33
 _atom_site_aniso_U_23
 _atom_site_aniso_U_13
 _atom_site_aniso_U_12
O1 0.0094(6) 0.0584(10) 0.0249(7) -0.0108(6) -0.0002(5) 0.0041(6)
O2 0.0304(8) 0.0195(7) 0.0423(8) -0.0019(6) 0.0018(6) -0.0060(5)
N1 0.0139(7) 0.0269(9) 0.0196(8) -0.0043(7) 0.0010(6) -0.0008(6)
C1 0.0144(9) 0.0380(11) 0.0233(9) -0.0031(8) 0.0002(7) 0.0039(8)
C2 0.0113(8) 0.0271(9) 0.0200(8) -0.0011(7) 0.0002(7) -0.0004(7)
C3 0.0114(7) 0.0148(7) 0.0211(8) 0.0018(6) 0.0000(6) 0.0002(6)
C4 0.0118(8) 0.0179(8) 0.0203(8) 0.0019(7) -0.0003(6) 0.0000(7)
C5 0.0085(7) 0.0179(7) 0.0212(8) -0.0009(7) -0.0027(6) -0.0004(6)
C6 0.0171(8) 0.0177(8) 0.0248(8) -0.0014(7) 0.0004(7) -0.0012(7)
C7 0.0229(9) 0.0267(9) 0.0245(9) 0.0027(7) 0.0009(8) -0.0076(8)
C8 0.0179(9) 0.0413(11) 0.0214(9) -0.0053(8) 0.0028(7) -0.0020(9)
C9 0.0191(9) 0.0301(9) 0.0281(9) -0.0104(8) -0.0025(8) 0.0069(8)
C10 0.0169(9) 0.0181(8) 0.0265(9) -0.0020(7) -0.0052(7) 0.0020(7)
C11 0.0101(8) 0.0199(8) 0.0283(9) -0.0030(7) 0.0011(7) -0.0001(7)
C12 0.0221(10) 0.0412(11) 0.0260(9) -0.0054(8) -0.0029(8) -0.0062(9)
C13 0.0166(9) 0.0279(10) 0.0287(10) 0.0091(8) 0.0015(8) 0.0046(8)
 
_geom_special_details
;
 All esds (except the esd in the dihedral angle between two l.s. planes)
 are estimated using the full covariance matrix.  The cell esds are taken
 into account individually in the estimation of esds in distances, angles
 and torsion angles; correlations between esds in cell parameters are only
 used when they are defined by crystal symmetry.  An approximate (isotropic)
 treatment of cell esds is used for estimating esds involving l.s. planes.
;
 
loop_
 _geom_bond_atom_site_label_1
 _geom_bond_atom_site_label_2
 _geom_bond_distance
 _geom_bond_site_symmetry_2
 _geom_bond_publ_flag
O1 C1 1.418(2) . ?
O1 H3N 0.80(3) . ?
O2 C11 1.215(2) . ?
N1 C4 1.479(2) . ?
N1 H1N 0.87(2) . ?
N1 H2N 0.873(19) . ?
C1 C2 1.509(2) . ?
C1 H1A 0.9900 . ?
C1 H1B 0.9900 . ?
C2 C3 1.530(2) . ?
C2 H2A 0.9900 . ?
C2 H2B 0.9900 . ?
C3 C11 1.530(2) . ?
C3 C4 1.582(2) . ?
C3 H3 1.0000 . ?
C4 C13 1.527(2) . ?
C4 C5 1.529(2) . ?
C5 C6 1.397(2) . ?
C5 C10 1.398(2) . ?
C6 C7 1.383(3) . ?
C6 H6 0.9500 . ?
C7 C8 1.389(3) . ?
C7 H7 0.9500 . ?
C8 C9 1.381(3) . ?
C8 H8 0.9500 . ?
C9 C10 1.392(3) . ?
C9 H9 0.9500 . ?
C10 H10 0.9500 . ?
C11 C12 1.492(3) . ?
C12 H12A 0.9800 . ?
C12 H12B 0.9800 . ?
C12 H12C 0.9800 . ?
C13 H13A 0.9800 . ?
C13 H13B 0.9800 . ?
C13 H13C 0.9800 . ?
 
loop_
 _geom_angle_atom_site_label_1
 _geom_angle_atom_site_label_2
 _geom_angle_atom_site_label_3
 _geom_angle
 _geom_angle_site_symmetry_1
 _geom_angle_site_symmetry_3
 _geom_angle_publ_flag
C1 O1 H3N 112(2) . . ?
C4 N1 H1N 111.7(17) . . ?
C4 N1 H2N 110.5(16) . . ?
H1N N1 H2N 105(2) . . ?
O1 C1 C2 109.52(15) . . ?
O1 C1 H1A 109.8 . . ?
C2 C1 H1A 109.8 . . ?
O1 C1 H1B 109.8 . . ?
C2 C1 H1B 109.8 . . ?
H1A C1 H1B 108.2 . . ?
C1 C2 C3 111.31(14) . . ?
C1 C2 H2A 109.4 . . ?
C3 C2 H2A 109.4 . . ?
C1 C2 H2B 109.4 . . ?
C3 C2 H2B 109.4 . . ?
H2A C2 H2B 108.0 . . ?
C2 C3 C11 110.35(13) . . ?
C2 C3 C4 113.57(13) . . ?
C11 C3 C4 111.70(13) . . ?
C2 C3 H3 106.9 . . ?
C11 C3 H3 106.9 . . ?
C4 C3 H3 106.9 . . ?
N1 C4 C13 106.92(14) . . ?
N1 C4 C5 107.34(13) . . ?
C13 C4 C5 112.81(15) . . ?
N1 C4 C3 110.37(14) . . ?
C13 C4 C3 111.42(14) . . ?
C5 C4 C3 107.91(13) . . ?
C6 C5 C10 117.88(15) . . ?
C6 C5 C4 119.70(15) . . ?
C10 C5 C4 122.39(15) . . ?
C7 C6 C5 121.22(16) . . ?
C7 C6 H6 119.4 . . ?
C5 C6 H6 119.4 . . ?
C6 C7 C8 120.38(18) . . ?
C6 C7 H7 119.8 . . ?
C8 C7 H7 119.8 . . ?
C9 C8 C7 119.18(17) . . ?
C9 C8 H8 120.4 . . ?
C7 C8 H8 120.4 . . ?
C8 C9 C10 120.65(17) . . ?
C8 C9 H9 119.7 . . ?
C10 C9 H9 119.7 . . ?
C9 C10 C5 120.69(17) . . ?
C9 C10 H10 119.7 . . ?
C5 C10 H10 119.7 . . ?
O2 C11 C12 120.87(17) . . ?
O2 C11 C3 120.99(16) . . ?
C12 C11 C3 118.12(16) . . ?
C11 C12 H12A 109.5 . . ?
C11 C12 H12B 109.5 . . ?
H12A C12 H12B 109.5 . . ?
C11 C12 H12C 109.5 . . ?
H12A C12 H12C 109.5 . . ?
H12B C12 H12C 109.5 . . ?
C4 C13 H13A 109.5 . . ?
C4 C13 H13B 109.5 . . ?
H13A C13 H13B 109.5 . . ?
C4 C13 H13C 109.5 . . ?
H13A C13 H13C 109.5 . . ?
H13B C13 H13C 109.5 . . ?
 
loop_
 _geom_torsion_atom_site_label_1
 _geom_torsion_atom_site_label_2
 _geom_torsion_atom_site_label_3
 _geom_torsion_atom_site_label_4
 _geom_torsion
 _geom_torsion_site_symmetry_1
 _geom_torsion_site_symmetry_2
 _geom_torsion_site_symmetry_3
 _geom_torsion_site_symmetry_4
 _geom_torsion_publ_flag
O1 C1 C2 C3 178.48(15) . . . . ?
C1 C2 C3 C11 72.82(19) . . . . ?
C1 C2 C3 C4 -160.87(15) . . . . ?
C2 C3 C4 N1 62.09(19) . . . . ?
C11 C3 C4 N1 -172.31(14) . . . . ?
C2 C3 C4 C13 -56.5(2) . . . . ?
C11 C3 C4 C13 69.06(19) . . . . ?
C2 C3 C4 C5 179.10(14) . . . . ?
C11 C3 C4 C5 -55.30(18) . . . . ?
N1 C4 C5 C6 45.61(19) . . . . ?
C13 C4 C5 C6 163.13(15) . . . . ?
C3 C4 C5 C6 -73.35(18) . . . . ?
N1 C4 C5 C10 -136.63(16) . . . . ?
C13 C4 C5 C10 -19.1(2) . . . . ?
C3 C4 C5 C10 104.42(17) . . . . ?
C10 C5 C6 C7 -0.3(2) . . . . ?
C4 C5 C6 C7 177.56(16) . . . . ?
C5 C6 C7 C8 -0.5(3) . . . . ?
C6 C7 C8 C9 0.9(3) . . . . ?
C7 C8 C9 C10 -0.5(3) . . . . ?
C8 C9 C10 C5 -0.3(3) . . . . ?
C6 C5 C10 C9 0.7(3) . . . . ?
C4 C5 C10 C9 -177.08(16) . . . . ?
C2 C3 C11 O2 44.2(2) . . . . ?
C4 C3 C11 O2 -83.17(19) . . . . ?
C2 C3 C11 C12 -134.11(17) . . . . ?
C4 C3 C11 C12 98.54(18) . . . . ?
 
loop_
 _geom_hbond_atom_site_label_D 
 _geom_hbond_atom_site_label_H 
 _geom_hbond_atom_site_label_A 
 _geom_hbond_distance_DH 
 _geom_hbond_distance_HA 
 _geom_hbond_distance_DA 
 _geom_hbond_angle_DHA 
 _geom_hbond_site_symmetry_A 
O1 H3N N1  0.80(3) 2.05(3) 2.837(2) 171(3) 1_655
N1 H1N O1  0.87(2) 2.19(2) 3.039(2) 166(2) 4_455
N1 H2N O2  0.873(19) 2.55(2) 3.374(2) 158(2) 3_645
 
_refine_diff_density_max    0.233
_refine_diff_density_min   -0.130
_refine_diff_density_rms    0.035

_shelx_res_file
;

    sad_a.res created by SHELXL-2014/7


TITL sad_a.res in P2(1)2(1)2(1)
CELL  1.54178   7.8093  11.0945  14.1156   90.000   90.000   90.000
ZERR   4.000   0.0010   0.0015   0.0019    0.000    0.000    0.000
LATT -1
SYMM 1/2-X, -Y, 1/2+Z
SYMM -X, 1/2+Y, 1/2-Z
SYMM 1/2+X, 1/2-Y, -Z
SFAC C  H  N  O
UNIT 52 76 4 8

L.S. 10
BOND $H
FMAP 2
PLAN 20
SIZE 0.44 0.32 0.25
TEMP -173
DFIX 0.84 O1 H1O
DFIX 0.88 N1 H1N N1 H2N
CONF
EQIV $1 x+1, y, z
HTAB O1 N1_$1
EQIV $2 x-1/2, -y+1/2, -z
HTAB N1 O1_$2
EQIV $3 -x+1, y-1/2, -z+1/2
HTAB N1 O2_$3
ACTA
WGHT    0.042000    0.257400
FVAR       1.29742
O1    4    0.874017    0.293438    0.073506    11.00000    0.00941    0.05843 =
         0.02489   -0.01078   -0.00023    0.00412
H3N   2    0.969330    0.274865    0.087645    11.00000    0.04568
O2    4    0.559874    0.551164    0.249542    11.00000    0.03042    0.01949 =
         0.04229   -0.00187    0.00181   -0.00605
N1    3    0.222933    0.256169    0.121049    11.00000    0.01393    0.02688 =
         0.01960   -0.00426    0.00097   -0.00081
H1N   2    0.272808    0.255229    0.066130    11.00000    0.03001
H2N   2    0.255262    0.189828    0.149136    11.00000    0.02895
C1    1    0.764205    0.297824    0.153406    11.00000    0.01443    0.03805 =
         0.02333   -0.00312    0.00019    0.00388
AFIX  23
H1A   2    0.815848    0.349068    0.203210    11.00000   -1.20000
H1B   2    0.748866    0.215732    0.179556    11.00000   -1.20000
AFIX   0
C2    1    0.592877    0.348771    0.124490    11.00000    0.01131    0.02710 =
         0.01996   -0.00114    0.00016   -0.00040
AFIX  23
H2A   2    0.543728    0.298729    0.073181    11.00000   -1.20000
H2B   2    0.608804    0.431451    0.099622    11.00000   -1.20000
AFIX   0
C3    1    0.468419    0.352026    0.208149    11.00000    0.01140    0.01476 =
         0.02105    0.00179   -0.00002    0.00019
AFIX  13
H3    2    0.481065    0.273720    0.242527    11.00000   -1.20000
AFIX   0
C4    1    0.274167    0.362515    0.177505    11.00000    0.01178    0.01788 =
         0.02031    0.00191   -0.00030   -0.00001
C5    1    0.165028    0.362741    0.267472    11.00000    0.00852    0.01792 =
         0.02121   -0.00095   -0.00269   -0.00043
C6    1    0.142882    0.255966    0.318456    11.00000    0.01715    0.01774 =
         0.02480   -0.00142    0.00036   -0.00124
AFIX  43
H6    2    0.192293    0.183462    0.295330    11.00000   -1.20000
AFIX   0
C7    1    0.050366    0.253848    0.401967    11.00000    0.02294    0.02675 =
         0.02452    0.00273    0.00086   -0.00764
AFIX  43
H7    2    0.036116    0.180087    0.435228    11.00000   -1.20000
AFIX   0
C8    1   -0.021829    0.358923    0.437489    11.00000    0.01788    0.04130 =
         0.02145   -0.00534    0.00282   -0.00199
AFIX  43
H8    2   -0.084010    0.357731    0.495326    11.00000   -1.20000
AFIX   0
C9    1   -0.002121    0.465172    0.387705    11.00000    0.01908    0.03014 =
         0.02809   -0.01040   -0.00245    0.00687
AFIX  43
H9    2   -0.051882    0.537309    0.411305    11.00000   -1.20000
AFIX   0
C10   1    0.089921    0.467610    0.303299    11.00000    0.01694    0.01808 =
         0.02649   -0.00198   -0.00517    0.00198
AFIX  43
H10   2    0.101822    0.541319    0.269686    11.00000   -1.20000
AFIX   0
C11   1    0.519018    0.451706    0.277635    11.00000    0.01008    0.01994 =
         0.02830   -0.00301    0.00112   -0.00009
C12   1    0.521610    0.422347    0.380788    11.00000    0.02213    0.04120 =
         0.02599   -0.00545   -0.00286   -0.00625
AFIX 137
H12A  2    0.610356    0.361924    0.393198    11.00000   -1.50000
H12B  2    0.409786    0.390315    0.399732    11.00000   -1.50000
H12C  2    0.546389    0.495522    0.417179    11.00000   -1.50000
AFIX   0
C13   1    0.243730    0.473234    0.115546    11.00000    0.01663    0.02789 =
         0.02871    0.00914    0.00145    0.00457
AFIX 137
H13A  2    0.303822    0.463256    0.055103    11.00000   -1.50000
H13B  2    0.287082    0.545119    0.147989    11.00000   -1.50000
H13C  2    0.120746    0.482405    0.103769    11.00000   -1.50000
AFIX   0
HKLF 4

REM  sad_a.res in P2(1)2(1)2(1)
REM R1 =  0.0301 for    2148 Fo > 4sig(Fo)  and  0.0301 for all    2150 data
REM    159 parameters refined using      2 restraints

END

WGHT      0.0420      0.2575

REM Highest difference peak  0.233,  deepest hole -0.130,  1-sigma level  0.035
Q1    1   0.3773  0.3597  0.1936  11.00000  0.05    0.23
Q2    1   0.2231  0.3637  0.2262  11.00000  0.05    0.20
Q3    1   0.5151  0.3535  0.1584  11.00000  0.05    0.18
Q4    1   0.4865  0.3922  0.2442  11.00000  0.05    0.15
Q5    1   0.2577  0.4257  0.1595  11.00000  0.05    0.15
Q6    1  -0.0178  0.2967  0.3952  11.00000  0.05    0.14
Q7    1   0.4902  0.2893  0.2631  11.00000  0.05    0.14
Q8    1   0.0461  0.2549  0.3448  11.00000  0.05    0.14
Q9    1   0.1181  0.4100  0.2837  11.00000  0.05    0.13
Q10   1   0.5673  0.3579  0.0629  11.00000  0.05    0.13
Q11   1   0.1142  0.3080  0.2827  11.00000  0.05    0.13
Q12   1   0.0350  0.4125  0.4220  11.00000  0.05    0.12
Q13   1   0.5423  0.3235  0.3615  11.00000  0.05    0.12
Q14   1   0.4817  0.1688  0.2527  11.00000  0.05    0.12
Q15   1   0.2474  0.3046  0.1576  11.00000  0.05    0.11
Q16   1   0.5331  0.2757  0.3402  11.00000  0.05    0.11
Q17   1   0.6912  0.3546  0.1369  11.00000  0.05    0.11
Q18   1   0.1767  0.3175  0.3023  11.00000  0.05    0.11
Q19   1   0.0973  0.4696  0.3620  11.00000  0.05    0.11
Q20   1   0.1577  0.2664  0.3762  11.00000  0.05    0.10
;
_shelx_res_checksum   81308

_shelx_hkl_file
;
   0   2   0 1197.28   51.39
   0  -2   0 1254.67   51.89
   0   3   0    0.80    1.30
   0   3   0    0.40    0.70
   0  -3   0    0.10    0.50
   0   4   0 2670.43  109.19
   0   4   0 2957.10  102.39
   0   4   0 2512.05  100.59
   0   4   0 2502.85  100.49
   0  -4   0 2387.36  100.89
   0   5   0    1.30    1.80
   0  -6   0   14.30    1.70
   0   6   0    8.20    2.30
   0  -7   0    0.20    0.90
   0   7   0    2.80    1.80
   0  -8   0  224.88    9.60
   0   8   0  229.98   13.70
   0   9   0    0.00    1.80
   0 -10   0 3721.63  141.49
   0  10   0 3652.63  141.19
   0 -10   0 3646.64  142.19
   0 -11   0    0.10    0.60
   0  11   0    0.30    0.40
   0 -12   0  238.18    9.60
   0  12   0  227.28    9.20
   0  13   0    0.30    0.20
   0 -13   0    0.20    0.40
   1  -1   0 1346.57   55.89
  -1   1   0 1359.46   55.69
   1  -2   0    4.50    2.20
   1  -2   0    6.60    0.90
  -1   2   0    3.90    1.10
   1  -3   0 1542.55   57.49
   1   3   0 1317.57   57.19
   1   3   0 1512.25   57.19
   1   3   0 1614.14   58.49
  -1   3   0 1517.35   58.49
  -1   3   0 1339.07   62.69
   1   4   0   47.20    3.60
   1   4   0   45.30    2.60
   1   4   0   40.40    2.30
   1  -4   0   41.30    2.70
  -1   4   0   36.90    3.30
  -1   4   0   33.70    2.00
  -1  -4   0   40.30    2.40
  -1   4   0   38.10    5.90
   1   5   0  308.67   15.10
   1  -5   0  323.97   13.90
   1   5   0  317.07   13.50
   1   5   0  317.27   13.30
  -1   5   0  320.87   15.10
  -1   5   0  320.67   21.30
   1   6   0 1359.86   58.39
   1  -6   0 1459.55   56.69
  -1   6   0 1452.05   58.49
   1   7   0 1082.09   45.20
   1  -7   0 1029.10   42.50
  -1   7   0 1020.20   44.70
   1   8   0   18.60    3.80
   1  -8   0   18.20    2.70
  -1   8   0   16.90    3.50
  -1  -8   0   21.10    1.60
   1  -9   0   63.99    5.30
  -1   9   0   65.99    6.80
   1  10   0  491.45   19.10
   1 -10   0  499.25   19.40
  -1  10   0  512.75   19.10
  -1 -10   0  500.85   19.30
  -1 -10   0  433.16   20.00
   1  11   0  278.67   11.40
   1 -11   0  293.27   11.80
  -1 -11   0  289.27   11.70
  -1  11   0  292.07   11.50
   1 -12   0   43.50    2.40
   1  12   0   45.30    2.10
  -1  12   0   46.90    2.10
  -1 -12   0   45.50    2.40
   1  13   0   18.60    0.90
   1 -13   0   19.40    1.20
  -1  13   0   19.30    1.00
  -1 -13   0   20.50    1.20
   2   0   0 4584.54  168.68
   2   0   0 4396.46  168.38
  -2   0   0 4123.69  169.48
   2   1   0  729.23   28.20
   2  -1   0  729.03   28.20
   2  -1   0  689.33   28.50
  -2   1   0  697.83   29.50
  -2   1   0  750.02   33.70
   2  -2   0 5104.79  215.28
   2   2   0 5719.83  205.98
   2  -2   0 5270.57  205.78
   2  -2   0 5485.05  205.48
   2   2   0 5127.29  205.28
  -2   2   0 5331.87  207.58
   2  -3   0   56.39    2.70
   2  -3   0   57.69    3.30
   2   3   0   61.09    3.30
   2   3   0   53.59    2.80
  -2   3   0   62.69    2.90
  -2   3   0   53.19    4.10
  -2   3   0   57.59    6.70
   2  -4   0  263.17   11.60
   2   4   0  281.37   11.50
  -2   4   0  266.47   17.90
  -2   4   0  238.08   12.60
   2  -5   0  236.58   11.00
   2   5   0  230.88   10.70
  -2   5   0  242.98   12.50
   2  -6   0   15.10    2.20
   2   6   0   14.10    1.90
  -2   6   0   14.90    2.80
   2  -7   0  294.37   13.70
  -2   7   0  276.87   15.40
   2  -8   0  481.05   21.60
  -2   8   0  420.76   23.40
  -2  -8   0  526.15   19.50
   2  -9   0  762.52   29.90
   2   9   0  755.52   29.50
  -2   9   0  758.82   29.50
   2  10   0  541.15   21.30
   2 -10   0  551.94   21.70
  -2 -10   0  523.15   21.50
  -2  10   0  564.24   21.40
   2  11   0  125.59    5.30
   2 -11   0  133.49    5.70
  -2  11   0  129.59    5.40
  -2 -11   0  126.19    5.60
   2 -12   0    8.00    1.00
   2  12   0    6.90    0.60
  -2 -12   0    5.70    0.80
  -2  12   0    6.40    0.60
   3   0   0    1.00    0.70
   3   0   0    0.40    0.50
  -3   0   0    0.10    1.40
   3   1   0 3580.24  141.29
   3  -1   0 3707.43  141.09
   3  -1   0 3558.74  141.09
   3   1   0 3632.34  140.99
   3  -1   0 3787.12  140.99
  -3  -1   0 3574.94  142.89
  -3   1   0 3705.23  143.19
  -3   1   0 3694.33  149.88
   3  -2   0  912.71   38.70
   3   2   0  990.10   39.00
   3   2   0 1028.10   38.50
   3  -2   0  958.90   38.40
  -3   2   0 1018.20   40.90
  -3   2   0  968.50   46.70
   3  -3   0  100.19    5.20
   3   3   0   96.99    4.60
   3   3   0  102.09    5.30
   3  -3   0   98.39    4.60
  -3   3   0   92.19    4.60
  -3   3   0   91.49    6.40
   3  -4   0  288.97   13.30
   3   4   0  322.17   13.50
  -3   4   0  289.97   14.90
   3   5   0   18.80    2.30
  -3   5   0   22.50    3.40
   3   6   0   93.59    5.80
   3  -6   0  101.09    6.20
  -3   6   0   95.09    7.50
   3  -7   0    3.80    1.60
  -3   7   0    6.10    2.50
  -3  -7   0    4.00    0.90
   3  -8   0  122.89    7.60
  -3  -8   0  104.69    5.30
  -3   8   0  114.89    9.10
   3   9   0  121.79    5.00
   3  -9   0  119.59    5.50
  -3   9   0  120.09    5.10
   3  10   0    0.50    0.30
   3 -10   0    1.20    0.70
  -3  10   0    0.40    0.40
   3  11   0  193.18    7.60
   3 -11   0  193.48    8.10
  -3  11   0  194.08    7.80
  -3 -11   0  187.28    7.90
   3  12   0   55.69    2.40
   3 -12   0   56.19    2.70
  -3  12   0   59.09    2.80
   4   0   0 3572.64  142.09
   4   0   0 3820.02  141.79
  -4   0   0 3601.14  144.49
   4   1   0   38.30    2.50
   4  -1   0   35.60    2.50
   4  -1   0   38.00    2.50
   4   1   0   39.50    2.90
  -4   1   0   35.80    4.00
  -4  -1   0   31.80    3.80
  -4  -1   0   31.00    7.30
   4  -2   0  554.84   22.50
   4   2   0  543.45   22.60
   4   2   0  562.94   23.30
  -4   2   0  556.84   25.40
   4   3   0   35.40    2.50
   4   3   0   38.90    3.10
   4  -3   0   36.90    2.50
   4  -3   0   30.50    2.70
  -4   3   0   31.20    3.90
  -4   3   0   31.60    2.30
   4  -4   0   13.40    2.10
   4   4   0   13.80    2.00
  -4   4   0   13.90    2.90
   4  -5   0   14.70    2.60
   4   5   0   13.30    2.40
  -4   5   0   11.50    3.10
   4  -6   0    5.10    1.90
   4   6   0    5.30    1.60
  -4   6   0    6.00    2.60
  -4  -6   0    5.70    1.00
   4  -7   0   13.50    2.70
   4   7   0   17.00    2.90
  -4  -7   0   12.40    1.30
  -4   7   0    9.70    3.20
   4   8   0    7.00    0.70
   4  -8   0    8.30    1.20
  -4   8   0    6.20    0.80
  -4   8   0    8.10    1.00
   4  -9   0   68.09    3.40
   4   9   0   68.59    2.90
  -4   9   0   63.69    3.20
   4 -10   0  177.38    7.50
   4  10   0  172.48    7.00
   4  11   0   45.80    2.00
   4 -11   0   48.00    2.40
  -4 -11   0   48.90    2.30
   5   0   0    1.30    0.90
   5   0   0    1.10    0.80
   5   1   0  256.37   11.80
   5  -1   0  243.98   11.10
   5   1   0  249.18   11.20
   5   2   0   12.50    1.70
   5  -2   0   12.90    1.70
   5   2   0   13.40    2.30
   5   3   0    5.90    1.30
   5  -3   0    6.50    1.40
   5   4   0  224.98   11.10
  -5  -4   0  205.28    9.00
   5   5   0  134.49    8.10
  -5  -5   0  138.79    6.10
   5  -6   0  277.47   11.00
   5   6   0  254.47   10.30
   5  -6   0  242.58   10.50
  -5   6   0  263.97   10.70
   5  -7   0  144.49    6.30
   5   7   0  141.19    5.80
   5  -7   0  136.99    6.00
  -5   7   0  145.99    6.20
   5  -8   0    6.90    1.00
   5   8   0    6.40    0.70
  -5   8   0    5.90    0.90
   5   9   0  110.29    4.50
   5  -9   0  106.09    5.00
  -5   9   0  113.79    4.90
   5  10   0    5.50    0.50
   5 -10   0    6.40    0.90
  -5  10   0    5.90    0.70
  -5  10   0    6.40    0.90
  -5  11   0   12.50    1.00
  -5 -11   0   13.20    0.90
   6   0   0  114.29    6.30
   6   1   0    1.40    1.00
   6  -1   0    0.40    1.00
   6   2   0    7.20    1.60
   6  -2   0    8.60    1.70
   6   2   0    8.20    2.10
   6   3   0  481.85   22.00
   6  -3   0  496.85   20.90
   6   3   0  491.85   20.90
   6  -4   0  254.07   10.30
   6   4   0  254.67   10.20
  -6   4   0  256.97   10.50
  -6   4   0  252.27   10.40
   6  -5   0  851.41   33.60
   6   5   0  876.71   33.50
  -6   5   0  866.91   33.90
  -6   5   0  860.91   33.80
   6  -6   0   40.90    2.20
   6   6   0   44.00    2.10
  -6   6   0   42.80    2.40
   6   7   0   53.09    2.40
   6  -7   0   54.99    2.60
  -6   7   0   51.19    2.80
   6  -8   0    1.80    0.50
   6   8   0    2.60    0.40
  -6   8   0    1.90    0.60
   6  -9   0  170.58    7.20
   6   9   0  180.28    7.10
  -6   9   0  184.98    7.40
  -6  10   0   12.10    0.90
   7   0   0    1.10    0.50
  -7   0   0    0.50    0.50
   7  -1   0  308.87   12.90
   7   1   0  327.37   12.90
  -7   1   0  313.17   13.20
  -7   1   0  313.07   13.00
  -7  -1   0  341.87   13.30
  -7  -1   0  335.87   13.10
   7   2   0   90.89    3.90
   7  -2   0   90.29    3.90
  -7   2   0   88.29    4.20
  -7   2   0   91.19    4.10
  -7  -2   0   88.79    4.10
  -7  -2   0   88.79    4.20
   7  -3   0 1247.28   46.90
   7   3   0 1252.07   46.90
  -7   3   0 1175.38   47.20
  -7   3   0 1196.58   47.10
  -7  -3   0 1188.08   47.20
   7   4   0  528.85   20.50
   7  -4   0  520.65   20.60
  -7   4   0  505.95   20.70
  -7  -4   0  546.15   21.00
  -7   4   0  518.15   20.70
   7  -5   0   60.59    2.80
   7   5   0   56.89    2.60
  -7   5   0   58.89    2.90
  -7   5   0   58.99    3.00
   7  -6   0  460.85   18.00
   7   6   0  453.35   17.90
  -7   6   0  461.95   18.20
   7  -7   0   42.00    2.20
   7   7   0   46.40    2.00
  -7   7   0   49.20    2.40
   7   8   0    5.60    0.50
   7  -8   0    4.30    0.50
  -7   8   0    6.10    0.80
   8   0   0  850.31   32.40
  -8   0   0  836.42   32.70
  -8   0   0  818.52   32.60
   8   1   0    1.50    0.50
   8  -1   0    1.40    0.50
  -8  -1   0    2.70    0.70
  -8   1   0    1.60    0.50
  -8   1   0    1.70    0.70
   8  -2   0   20.90    1.30
   8   2   0   22.70    1.20
  -8  -2   0   21.40    1.50
  -8   2   0   20.70    1.50
  -8   2   0   20.60    1.40
   8  -3   0    2.00    0.50
   8   3   0    2.10    0.40
  -8   3   0    2.10    0.60
  -8   3   0    3.30    0.60
  -8  -3   0    0.70    0.50
   8   4   0  140.19    5.70
   8  -4   0  148.09    5.80
  -8  -4   0  139.99    5.90
  -8   4   0  133.19    5.80
   8  -5   0   27.50    1.40
   8   5   0   27.40    1.30
  -8   5   0   25.90    1.50
   8  -6   0   11.30    0.80
   8   6   0   12.00    0.70
  -8   6   0   10.70    0.90
   9   0   0    0.00    0.30
  -9   0   0    0.50    0.40
   9  -1   0   30.20    1.50
   9   1   0   29.70    1.40
  -9  -1   0   30.90    1.70
  -9   1   0   31.80    1.70
   9   2   0   77.09    3.30
   9  -2   0   82.99    3.40
  -9   2   0   80.29    3.50
  -9  -2   0   82.19    3.60
   9   3   0   27.30    1.20
   9  -3   0   28.40    1.30
  -9  -3   0   27.90    1.40
  -9   3   0   24.40    1.40
   0 -13   1   23.10    1.40
   0 -12   1  181.08    7.50
   0  12  -1  176.88    7.20
   0  11  -1   63.99    2.80
   0 -11   1   61.09    3.10
   0 -10   1  902.31   36.50
   0 -10   1  914.11   35.70
   0  10  -1  920.11   35.30
   0  -9   1   42.50    2.50
   0   9  -1   38.90    5.50
   0   8  -1  543.65   27.00
   0  -8   1  587.04   22.60
   0   7  -1   95.99    7.30
   0  -7   1  100.29    5.80
   0  -6   1    3.00    1.20
   0   6  -1    4.60    1.90
   0   6  -1    1.40    1.00
   0   5  -1  118.69    6.80
   0  -5   1   95.59    5.30
   0   5  -1  103.09    5.00
   0  -4   1  990.70   38.30
   0   4  -1  960.80   45.50
   0   4  -1  970.00   39.50
   0   4  -1  956.90   37.90
   0   3  -1 2298.27   98.59
   0   3  -1 2422.56   93.09
   0  -3   1 2335.37   93.39
   0   3  -1 2609.34   94.39
   0   0  -1    2.70    0.80
   0   1   1 1837.02   74.79
   0   3   1 2726.53  103.09
   0   3   1 2117.09   94.49
   0   3   1 2396.86   95.49
   0  -3  -1 2567.14   94.79
   0  -4  -1 1041.00   38.20
   0   4   1  930.11   46.20
   0   4   1  975.20   37.80
   0   4   1  913.61   39.10
   0   5   1  107.49   11.70
   0   5   1  127.59    7.10
   0  -5  -1  108.89    5.80
   0   6   1    7.70    2.30
   0  -6  -1    2.60    1.10
   0  -7  -1  101.29    6.00
   0   7   1  115.29    8.00
   0   8   1  602.64   28.60
   0   9   1   37.70    5.20
   0 -10  -1  957.80   36.60
   0  10   1  913.01   36.30
   0  11   1   63.79    2.90
   0 -11  -1   67.29    3.30
   0 -12  -1  177.28    7.40
   0  12   1  174.68    7.10
   0  13   1   23.40    1.20
   0 -13  -1   24.00    1.40
   1 -13   1   10.30    0.90
  -1 -13   1   11.20    0.90
   1 -12   1    9.00    1.00
   1  12  -1    6.50    0.60
  -1  12  -1    6.60    0.60
  -1  12  -1    5.90    0.80
  -1 -12   1    5.90    0.80
   1  11  -1  239.28    9.80
   1 -11   1  243.18   10.20
  -1 -11   1  245.08   10.10
  -1 -11   1  251.37   10.80
  -1  11  -1  251.37    9.80
   1 -10   1  159.58    7.50
   1 -10   1  156.98    6.80
   1  10  -1  160.08    6.50
  -1  10  -1  162.18    6.50
  -1 -10   1  154.08    6.70
   1  -9   1 1641.14   64.29
  -1  -9   1 1572.54   62.99
  -1   9  -1 1520.75   62.59
  -1  -9   1 1769.82   63.09
  -1   9  -1 1584.74   68.69
   1  -8   1  791.82   31.90
   1   8  -1  705.73   36.50
   1  -8   1  878.71   34.20
  -1   8  -1  791.72   36.60
  -1  -8   1  873.01   32.00
   1   7  -1  927.71   42.20
   1  -7   1  984.20   39.80
  -1   7  -1 1000.70   42.20
   1   6  -1  152.38    9.40
   1   6  -1  151.98    7.20
   1  -6   1  153.48    7.90
  -1   6  -1  151.28    9.10
   1  -5   1  405.86   16.80
   1   5  -1  393.36   16.20
   1   5  -1  387.26   18.20
  -1   5  -1  380.46   15.90
  -1   5  -1  388.86   18.00
  -1   5  -1  400.76   24.30
   1   4  -1 2928.11  115.79
   1   4  -1 2953.10  114.09
   1  -4   1 3099.69  114.59
   1   4  -1 2890.61  113.99
  -1  -4   1 2742.73  114.39
  -1   4  -1 2853.21  120.69
  -1   4  -1 3237.48  115.69
  -1   4  -1 2905.21  113.89
   1  -3   1  181.68   12.50
   1  -3   1  191.08    8.60
   1   3  -1  216.08    9.60
   1   3  -1  202.08    8.30
   1   3  -1  202.38    8.30
  -1   3  -1  217.18   12.40
  -1   3  -1  192.98    8.10
  -1   3  -1  167.78    9.10
   1   2  -1 2439.86   95.29
   1  -2   1 2509.05  100.49
   1  -2   1 2463.75   95.59
  -1   0  -1  228.58   10.30
  -1   0   1  220.28   12.40
   1  -1  -1 3694.83  149.99
   1   2   1 2265.07   95.79
   1  -2  -1 2502.55   89.09
   1   2   1 2260.47   88.99
  -1   2   1 2362.76   89.89
  -1   2   1 2110.39   94.09
   1   3   1  200.08   13.60
   1  -3  -1  181.18    8.00
   1   3   1  180.38    8.60
   1   3   1  185.48    7.90
  -1   3   1  170.58    8.80
  -1   3   1  172.08   13.00
   1  -4  -1 3048.29  120.59
   1   4   1 3238.18  130.79
   1   4   1 2848.42  120.29
  -1   4   1 3185.38  121.99
  -1   4   1 3242.68  130.39
  -1  -4  -1 3105.29  120.19
   1  -5  -1  404.06   17.20
   1   5   1  385.46   16.90
   1   5   1  366.86   18.20
  -1   5   1  410.76   26.30
  -1   5   1  457.65   19.00
  -1  -5  -1  407.26   16.80
   1  -6  -1  157.98    8.10
   1   6   1  160.88    9.50
  -1   6   1  165.58    9.60
   1   7   1 1006.70   40.10
   1  -7  -1  896.71   37.40
  -1   7   1  827.22   39.20
   1  -8  -1  919.51   35.70
   1   8   1  765.72   37.80
  -1   8   1  857.41   38.30
   1   9   1 1525.45   66.49
   1  -9  -1 1547.15   62.99
   1   9   1 1672.23   59.99
  -1   9   1 1491.95   66.09
  -1   9   1 1519.45   59.99
   1 -10  -1  161.28    6.90
   1  10   1  153.68    6.50
  -1  10   1  164.08    6.60
   1  11   1  255.57   10.10
   1 -11  -1  253.87   10.50
  -1 -11  -1  254.47   10.40
  -1  11   1  250.27   10.10
   1  12   1    7.30    0.70
   1 -12  -1    7.30    1.00
  -1 -12  -1    7.00    0.90
  -1  12   1    6.70    0.70
   1  13   1   11.70    0.70
   1 -13  -1   10.30    0.90
  -1 -13  -1   11.70    0.90
  -1  13   1   12.10    0.70
   2  12  -1    2.50    0.40
   2 -12   1    3.70    0.70
  -2  12  -1    4.10    0.80
  -2 -12   1    2.10    0.60
   2  11  -1  232.98    9.50
   2 -11   1  247.38   10.00
  -2 -11   1  236.98    9.80
  -2 -11   1  247.18   10.50
  -2  11  -1  235.88    9.60
   2 -10   1   53.69    2.90
   2  10  -1   53.99    2.40
  -2 -10   1   49.10    2.60
  -2  10  -1   52.79    2.50
   2   9  -1  418.46   16.90
   2  -9   1  434.16   17.40
   2  -9   1  404.36   18.00
  -2   9  -1  441.96   17.00
  -2  -9   1  465.35   17.70
   2  -8   1   58.59    5.00
  -2   8  -1   65.69    6.50
  -2  -8   1   73.49    3.70
   2  -7   1    7.90    2.10
  -2   7  -1    7.30    2.60
  -2  -7   1    6.00    1.20
   2  -6   1  118.29    6.80
  -2   6  -1  122.79    8.10
   2   5  -1 1236.28   47.10
   2  -5   1 1164.58   47.40
   2   5  -1 1166.08   46.80
  -2   5  -1 1165.48   48.80
   2   4  -1  893.21   39.50
   2   4  -1  988.80   39.40
   2  -4   1 1028.30   39.90
  -2   4  -1 1020.30   39.10
  -2   4  -1 1050.39   41.30
   2   3  -1  816.12   33.50
   2   3  -1  869.01   34.20
   2   3  -1  914.41   34.10
   2  -3   1  843.92   33.60
   2  -3   1  871.81   34.40
  -2   3  -1  835.32   33.70
  -2   3  -1  919.71   35.50
  -2   3  -1  820.92   38.70
   2  -2   1  967.80   42.30
   2  -2   1  971.60   38.50
   2   2  -1  919.31   37.90
   2  -2   1  993.10   38.00
  -2   2  -1  963.80   39.30
  -2   2  -1  996.40   42.00
  -2   2  -1 1011.60   38.10
   2   0  -1 1686.43   69.29
   2   0   1 1766.02   69.49
   2   0  -1 1798.82   69.59
   2   0   1 1803.12   69.39
  -2   0   1 1823.82   70.99
  -2   0   1 1896.41   76.99
   2   2   1 1014.10   39.40
   2  -2  -1  999.70   39.30
   2  -2  -1 1026.60   39.70
   2   2   1 1028.00   39.80
  -2   2   1 1046.80   47.60
  -2   2   1  939.91   41.10
   2   3   1  883.71   35.70
   2   3   1  963.30   36.30
   2  -3  -1  872.61   35.50
   2  -3  -1  832.82   36.10
  -2   3   1 1004.50   38.00
  -2   3   1  915.51   44.30
   2   4   1 1068.29   43.20
   2  -4  -1 1111.49   43.40
  -2   4   1  994.70   52.09
  -2   4   1 1179.58   45.20
   2   5   1 1160.98   46.50
   2  -5  -1 1253.07   46.80
  -2   5   1 1084.79   48.40
   2  -6  -1  119.99    6.60
   2   6   1  107.69    6.30
  -2   6   1  125.39    8.20
   2  -7  -1    6.10    1.80
  -2   7   1    8.00    2.50
   2  -8  -1   69.49    5.20
  -2   8   1   62.19    6.40
   2  -9  -1  441.26   17.50
   2   9   1  424.86   17.10
  -2   9   1  438.06   17.10
   2  10   1   52.39    2.40
   2 -10  -1   52.79    2.90
  -2 -10  -1   53.49    2.70
  -2  10   1   53.69    2.50
   2 -11  -1  241.68    9.90
   2  11   1  242.88    9.60
  -2 -11  -1  241.48    9.80
  -2  11   1  233.98    9.60
   2 -12  -1    2.80    0.70
   2  12   1    2.70    0.40
  -2  12   1    3.10    0.50
  -2 -12  -1    2.90    0.60
   3 -12   1    1.70    0.60
  -3  12  -1    1.80    0.60
  -3 -12   1    1.30    0.50
   3  11  -1   43.60    2.00
   3 -11   1   46.20    2.50
  -3 -11   1   45.10    2.30
   3  10  -1  372.96   14.90
   3 -10   1  385.26   15.40
  -3 -10   1  369.96   15.10
  -3  10  -1  392.76   15.00
   3   9  -1   14.60    1.00
   3  -9   1   17.10    1.50
  -3   9  -1   17.90    1.20
  -3  -9   1   12.90    1.50
   3  -8   1   39.80    4.30
  -3  -8   1   57.29    3.00
  -3   8  -1   43.20    5.60
   3  -7   1  130.29    7.90
  -3   7  -1  122.69    9.20
  -3  -7   1  132.79    5.80
   3   6  -1  291.87   13.90
   3  -6   1  296.37   14.40
  -3   6  -1  323.57   16.20
   3  -5   1 1177.68   46.10
   3   5  -1 1105.09   45.70
  -3   5  -1 1129.89   47.80
   3   4  -1   43.00    3.10
   3  -4   1   41.90    3.20
  -3   4  -1   39.10    3.90
  -3   4  -1   41.10    2.50
   3  -3   1  266.47   13.30
   3   3  -1  315.67   12.80
   3  -3   1  352.76   12.80
   3   3  -1  298.87   13.40
  -3   3  -1  319.77   14.80
  -3   3  -1  300.37   12.80
   3  -2   1  411.16   16.90
   3   2  -1  421.26   16.90
   3  -2   1  406.76   17.30
   3   2  -1  429.36   17.40
  -3   2  -1  413.36   18.60
   3   1  -1  188.68    8.40
   3   1  -1  191.08    8.00
   3  -1   1  183.18    8.10
   3  -1   1  181.08    8.20
   3  -1   1  190.78    8.10
  -3  -1   1  190.48   15.90
  -3   1  -1  174.18    9.40
   3   0  -1 7247.08  267.57
   3   0   1 6715.43  267.97
   3   0  -1 6777.32  268.27
  -3   0   1 7172.38  283.37
  -3   0  -1 6825.22  269.37
  -3   0  -1 6842.22  279.37
  -3   0   1 7105.29  270.57
   3   1   1  181.58    8.60
   3  -1  -1  196.28    8.30
   3  -1  -1  190.68    8.20
   3   1   1  188.28    8.30
  -3  -1  -1  170.98    9.50
  -3   1   1  214.58   10.70
  -3   1   1  205.58   15.80
   3   2   1  453.45   18.40
   3  -2  -1  435.76   18.10
   3  -2  -1  425.46   17.70
   3   2   1  443.36   17.90
  -3   2   1  434.56   26.70
  -3   2   1  447.66   20.40
   3  -3  -1  292.67   13.50
   3   3   1  326.07   13.10
   3   3   1  323.97   13.70
   3  -3  -1  308.67   12.90
  -3   3   1  289.57   21.20
  -3   3   1  338.37   15.80
   3  -4  -1   42.10    3.20
   3  -4  -1   40.30    2.40
   3   4   1   48.90    3.40
  -3   4   1   39.50    4.20
   3  -5  -1 1208.48   46.40
   3   5   1 1019.90   46.10
  -3   5   1 1217.48   48.90
   3  -6  -1  298.67   14.20
   3   6   1  304.87   14.20
  -3   6   1  305.97   16.40
   3  -7  -1  121.89    7.50
   3   7   1  127.49    7.40
  -3   7   1  126.09    9.30
   3  -8  -1   49.60    4.50
  -3   8   1   44.60    5.70
   3  -9  -1   17.00    1.50
   3   9   1   15.90    1.10
  -3   9   1   14.70    1.10
   3 -10  -1  377.16   15.50
   3  10   1  390.66   15.10
  -3  10   1  395.26   15.20
  -3 -10  -1  370.66   15.30
   3 -11  -1   47.80    2.50
   3  11   1   46.10    2.10
  -3  11   1   43.50    2.20
  -3 -11  -1   47.20    2.40
   3  12   1    1.70    0.30
   3 -12  -1    1.20    0.50
  -3 -12  -1    1.60    0.50
   4 -11   1   14.60    1.20
  -4  11  -1   13.30    1.20
  -4 -11   1   12.80    1.10
   4 -10   1   20.30    1.60
   4  10  -1   19.40    1.00
   4  -9   1  257.47   10.50
   4   9  -1  254.77   10.00
  -4   9  -1  242.88   10.30
   4  -8   1   98.39    4.50
   4   8  -1   93.69    4.00
  -4   8  -1   93.69    4.30
  -4  -8   1   89.59    4.60
   4  -7   1  327.77   15.80
  -4  -7   1  336.87   13.40
  -4   7  -1  303.27   17.50
   4   6  -1  346.77   15.80
   4  -6   1  334.57   16.10
  -4  -6   1  344.37   13.80
  -4   6  -1  321.07   17.70
   4   5  -1   86.59    5.50
   4  -5   1   84.29    5.60
  -4  -5   1   84.49    4.10
  -4   5  -1   77.99    6.70
   4   4  -1  826.32   31.90
   4  -4   1  758.22   31.70
  -4   4  -1  710.33   33.30
   4  -3   1  880.21   36.80
   4  -3   1  951.80   36.20
   4   3  -1  878.01   37.00
   4   3  -1  939.71   36.20
  -4   3  -1  958.80   36.40
  -4   3  -1  850.01   38.60
   4   2  -1  491.65   20.30
   4  -2   1  485.85   20.40
   4   2  -1  477.15   21.00
  -4  -2   1  502.45   23.60
  -4   2  -1  538.35   25.20
   4  -1   1 1336.47   51.19
   4   1  -1 1340.07   51.09
   4  -1   1 1236.68   51.19
   4   1  -1 1318.07   51.69
  -4  -1   1 1274.37   54.29
   4   0  -1    0.80    0.70
   4   0  -1    3.10    0.90
   4   0   1    1.60    0.80
   4   0   1    1.10    0.80
  -4   0   1    2.70    1.80
  -4   0   1    1.40    2.70
   4  -1  -1 1305.17   53.39
   4   1   1 1417.76   54.19
   4   1   1 1362.06   53.59
  -4   1   1 1368.86   56.89
   4   2   1  516.55   20.60
   4  -2  -1  495.15   20.30
   4   2   1  507.05   21.10
  -4   2   1  474.95   23.50
   4  -3  -1  873.71   35.90
   4   3   1  965.40   36.50
   4  -3  -1  903.41   35.30
   4   3   1  861.51   35.50
  -4   3   1  837.22   38.60
   4  -4  -1  781.22   33.70
   4   4   1  899.11   34.40
   4  -4  -1  828.22   32.90
  -4   4   1  788.42   36.50
   4  -5  -1   79.29    5.30
   4   5   1   78.69    5.40
  -4   5   1   87.59    7.30
   4  -6  -1  316.77   16.50
   4   6   1  348.97   16.70
  -4   6   1  422.26   20.20
   4   7   1  325.47   15.70
  -4   7   1  328.07   18.30
   4  -8  -1   91.59    4.40
   4   8   1   93.19    3.90
  -4   8   1   90.09    4.20
  -4   8   1   90.49    4.00
   4   9   1  256.27   10.10
   4  -9  -1  243.38   10.50
  -4   9   1  254.97   10.40
  -4   9   1  253.77   10.20
   4  10   1   21.40    1.20
   4 -10  -1   19.70    1.50
   4 -11  -1   12.20    1.10
   4  11   1   12.90    0.80
  -4 -11  -1   14.50    1.10
   5 -11   1   14.10    1.00
  -5 -11   1   17.10    1.00
  -5  11  -1   14.20    1.10
   5 -10   1   38.30    2.10
  -5  10  -1   39.00    2.00
  -5  10  -1   37.90    2.10
   5  -9   1  131.89    5.70
   5   9  -1  126.49    5.20
  -5   9  -1  125.49    5.70
  -5   9  -1  128.09    5.50
   5  -8   1   47.30    2.70
   5   8  -1   49.00    2.20
  -5   8  -1   46.60    2.50
   5   7  -1  101.19    4.20
   5  -7   1  106.09    4.80
  -5   7  -1  102.19    4.60
  -5  -7   1   96.19    4.90
   5   6  -1   15.00    1.00
   5  -6   1   13.40    1.40
  -5  -6   1   15.60    1.50
  -5   6  -1   13.40    1.20
   5   5  -1  125.79    7.40
   5  -5   1  111.79    7.20
  -5  -5   1  113.49    5.30
   5   4  -1   10.10    2.20
  -5  -4   1   10.10    1.10
   5   3  -1   67.79    4.00
   5  -3   1   69.49    4.00
   5   3  -1   56.69    4.50
  -5  -3   1   62.19    3.20
  -5  -3   1   66.39    6.80
  -5   3  -1   68.09    4.10
   5   2  -1  601.34   24.70
   5   2  -1  612.84   25.60
   5  -2   1  602.74   24.70
  -5   2  -1  626.44   24.90
  -5  -2   1  554.34   28.50
   5   1  -1   44.50    3.10
   5   1  -1   42.10    3.40
   5  -1   1   40.90    3.00
  -5  -1   1   44.20    5.30
   5   0   1   32.90    2.70
   5   0  -1   33.20    2.60
  -5   0   1   35.10    4.70
   5   1   1   44.30    3.20
   5  -1  -1   44.40    3.10
   5   1   1   42.10    3.50
  -5   1   1   38.80    5.10
   5   2   1  614.04   26.20
   5  -2  -1  615.44   25.30
   5   2   1  613.54   25.50
  -5   2   1  624.54   29.40
   5   3   1   73.69    5.00
   5  -3  -1   67.79    4.10
   5   3   1   66.89    4.20
  -5   3   1   62.39    6.40
   5   4   1   12.20    2.50
  -5   4   1   13.10    3.70
   5   5   1  121.09    7.60
  -5   5   1  125.59    9.60
   5  -6  -1   14.30    1.10
   5   6   1   15.40    1.00
  -5   6   1   17.40    1.30
  -5   6   1   15.40    1.30
   5   7   1  106.09    4.30
   5  -7  -1   97.29    4.40
  -5   7   1   99.39    4.60
  -5   7   1  100.29    4.60
   5   8   1   48.00    2.30
  -5   8   1   51.29    2.60
   5   9   1  136.39    5.40
   5  -9  -1  127.89    5.60
  -5   9   1  133.89    5.80
   5 -10  -1   36.10    1.90
   5  10   1   42.50    1.80
  -5  10   1   39.40    2.00
   5  11   1   14.90    0.80
  -5 -11  -1   16.00    1.00
  -5  11   1   16.10    1.10
  -6  10  -1    7.00    0.60
  -6 -10   1    6.90    0.70
   6  -9   1  105.89    4.80
  -6   9  -1  118.49    4.90
   6  -8   1    6.70    0.90
   6   8  -1    4.80    0.50
  -6   8  -1    7.30    0.90
   6  -7   1  564.54   23.30
   6   7  -1  591.64   22.80
  -6   7  -1  608.04   23.30
   6  -6   1    1.30    0.50
   6   6  -1    1.50    0.40
   6  -6   1    2.00    0.70
  -6   6  -1    0.80    0.50
   6  -5   1    9.90    1.20
   6  -5   1   10.20    1.00
   6   5  -1    9.20    0.80
  -6   5  -1    8.50    1.10
  -6  -5   1   11.20    1.20
   6  -4   1  270.67   11.30
   6   4  -1  274.57   10.60
   6  -4   1  259.17   10.70
  -6   4  -1  260.17   10.80
  -6  -4   1  270.77   11.20
  -6   4  -1  256.97   10.90
   6  -3   1  530.75   21.80
   6   3  -1  479.55   21.60
   6   3  -1  533.45   23.10
  -6  -3   1  515.45   20.60
   6   2  -1  237.58   10.70
   6  -2   1  228.68   10.70
  -6  -2   1  218.28    9.40
  -6   2  -1  217.08   10.70
   6   1  -1  519.05   22.10
   6  -1   1  524.55   22.20
   6   0   1   40.30    3.30
   6   0  -1   41.30    3.20
   6   1   1  474.35   21.80
   6  -1  -1  513.85   21.20
   6   1   1  504.45   21.30
   6   2   1  234.68   11.80
   6  -2  -1  226.68   10.80
   6   2   1  230.38   10.90
   6   3   1  473.35   21.70
   6   3   1  542.05   23.20
   6  -3  -1  527.35   21.80
   6  -4  -1  261.67   10.70
   6   4   1  270.47   10.60
  -6   4   1  270.77   10.90
  -6   4   1  255.07   10.80
   6  -5  -1   10.60    1.00
   6   5   1   12.20    0.90
  -6   5   1    8.60    1.10
  -6   5   1   10.00    1.10
   6  -6  -1    1.40    0.50
   6   6   1    1.30    0.40
  -6   6   1    1.40    0.60
  -6   6   1    0.70    0.50
   6   7   1  605.04   22.70
   6  -7  -1  587.94   22.90
  -6   7   1  534.45   23.20
  -6   7   1  604.04   23.10
   6   8   1    6.10    0.60
   6  -8  -1    5.20    0.70
  -6   8   1    4.60    0.80
   6   9   1  115.69    4.60
   6  -9  -1  109.59    4.80
  -6   9   1  118.69    4.90
   6  10   1    5.90    0.50
   6 -10  -1    6.00    0.60
  -6  10   1    6.00    0.60
  -6 -10  -1    6.00    0.70
   7  -8   1   57.39    2.60
  -7   8  -1   63.29    2.80
   7   7  -1   23.00    1.20
   7  -7   1   20.90    1.30
  -7   7  -1   23.60    1.50
   7  -6   1   38.20    2.00
   7   6  -1   39.50    1.80
  -7   6  -1   38.90    2.20
   7   5  -1  360.06   13.80
   7  -5   1  354.86   14.00
  -7   5  -1  339.67   14.10
   7  -4   1  228.58    9.00
   7   4  -1  217.98    8.80
  -7   4  -1  223.38    9.10
  -7   4  -1  212.48    9.00
   7  -3   1  145.19    6.00
   7   3  -1  146.89    5.90
  -7  -3   1  139.09    6.20
  -7   3  -1  140.79    6.10
  -7   3  -1  139.89    6.20
   7   2  -1  295.27   11.60
   7  -2   1  285.77   11.70
  -7   2  -1  282.27   12.00
  -7  -2   1  288.17   12.00
  -7  -2   1  308.87   11.90
   7  -1   1  239.28    9.70
   7   1  -1  243.78    9.60
  -7   1  -1  241.28   10.00
  -7  -1   1  250.67    9.90
  -7  -1   1  232.08   10.00
  -7   1  -1  232.48    9.80
   7   0   1  122.39    5.10
   7   0  -1  121.09    5.00
  -7   0  -1  117.29    5.40
  -7   0  -1  118.29    5.20
  -7   0   1  120.39    5.20
  -7   0   1  113.79    5.40
   7   1   1  246.28    9.60
   7  -1  -1  239.48    9.50
  -7  -1  -1  228.88    9.70
  -7  -1  -1  238.68    9.90
  -7   1   1  232.28    9.90
  -7   1   1  234.58    9.70
   7  -2  -1  291.07   11.40
   7   2   1  288.77   11.40
  -7  -2  -1  283.67   11.70
  -7   2   1  287.57   11.60
  -7   2   1  275.47   11.70
   7   3   1  153.48    6.10
   7  -3  -1  145.69    6.10
  -7   3   1  150.78    6.30
  -7   3   1  140.99    6.40
  -7  -3  -1  140.99    6.30
   7   4   1  223.58    8.90
   7  -4  -1  217.88    8.90
  -7  -4  -1  218.58    9.10
  -7   4   1  220.08    9.10
  -7   4   1  221.08    9.20
   7   5   1  364.16   14.00
   7  -5  -1  338.07   14.10
  -7   5   1  361.46   14.30
  -7   5   1  359.46   14.30
   7  -6  -1   41.50    2.10
   7   6   1   44.80    2.00
  -7   6   1   39.90    2.20
  -7   6   1   39.80    2.20
   7  -7  -1   23.10    1.30
   7   7   1   22.90    1.20
  -7   7   1   22.40    1.50
   7   8   1   61.69    2.60
  -7   8   1   63.99    2.90
   8  -6   1  465.55   18.40
  -8   6  -1  479.55   18.50
   8   5  -1   47.80    2.00
   8  -5   1   49.40    2.20
  -8   5  -1   47.00    2.30
   8   4  -1  124.59    5.00
   8  -4   1  121.09    5.10
   8  -3   1  182.28    7.50
   8   3  -1  183.78    7.30
  -8   3  -1  179.78    7.50
  -8   3  -1  182.08    7.60
  -8  -3   1  189.58    7.70
   8  -2   1  248.68    9.90
   8   2  -1  251.77    9.90
  -8   2  -1  252.97   10.20
  -8   2  -1  240.38   10.00
  -8  -2   1  246.88   10.20
   8  -1   1  167.08    7.00
   8   1  -1  177.48    7.00
  -8  -1   1  174.38    7.10
  -8   1  -1  171.18    7.30
  -8   1  -1  164.98    7.10
  -8  -1   1  172.08    7.30
   8   0  -1  129.69    5.30
   8   0   1  126.19    5.40
  -8   0   1  128.79    5.50
  -8   0  -1  129.99    5.70
  -8   0   1  128.89    5.70
   8  -1  -1  183.58    7.30
   8   1   1  177.18    7.30
  -8   1   1  181.98    7.60
  -8   1   1  177.78    7.50
  -8  -1  -1  175.28    7.60
   8  -2  -1  256.57   10.20
   8   2   1  256.67   10.10
  -8   2   1  256.07   10.50
  -8   2   1  254.17   10.30
  -8  -2  -1  247.18   10.40
   8  -3  -1  189.28    7.60
   8   3   1  194.58    7.60
  -8   3   1  187.98    7.80
  -8   3   1  185.28    7.90
  -8  -3  -1  186.88    7.90
   8  -4  -1  132.39    5.30
   8   4   1  132.89    5.30
  -8  -4  -1  124.69    5.50
  -8   4   1  125.59    5.40
   8   5   1   52.39    2.20
   8  -5  -1   51.89    2.30
  -8   5   1   46.70    2.40
  -8   5   1   48.60    2.40
   8  -6  -1  499.75   19.20
   8   6   1  492.65   19.10
  -8   6   1  485.65   19.30
   9  -3   1   60.79    2.60
  -9  -3   1   62.59    2.70
   9   2  -1  123.49    5.00
   9  -2   1  126.29    5.10
  -9  -2   1  132.09    5.30
  -9   2  -1  125.19    5.30
   9  -1   1   21.60    1.20
   9   1  -1   21.00    1.10
  -9   1  -1   22.00    1.30
  -9  -1   1   23.60    1.40
   9   0   1    1.60    0.40
   9   0  -1    1.30    0.30
  -9   0   1    1.20    0.50
  -9   0  -1    1.60    0.50
   9   1   1   22.30    1.10
   9  -1  -1   21.50    1.10
  -9   1   1   22.00    1.30
  -9  -1  -1   21.30    1.30
   9   2   1  125.29    5.10
   9  -2  -1  126.69    5.10
  -9  -2  -1  130.49    5.30
  -9   2   1  126.79    5.30
   9  -3  -1   61.99    2.60
   9   3   1   61.29    2.50
  -9  -3  -1   61.79    2.70
  -9   3   1   58.29    2.70
  -9   3   1   60.89    2.70
   0 -13   2   30.30    1.60
   0 -12   2  200.38    8.10
   0  12  -2  188.48    7.70
   0  11  -2    3.20    0.50
   0 -11   2    2.40    0.70
   0 -11   2    1.90    0.70
   0  10  -2  987.60   38.30
   0 -10   2  910.51   38.90
   0 -10   2 1055.39   39.70
   0 -10   2 1004.70   38.60
   0   9  -2   49.90    6.30
   0  -9   2   50.49    2.90
   0  -8   2   11.20    1.20
   0   8  -2   11.20    3.50
   0   7  -2   72.49    6.30
   0   6  -2   12.10    2.50
   0   6  -2   10.00    1.40
   0  -6   2   10.70    1.70
   0   5  -2 1373.86   54.79
   0   5  -2 1463.15   57.09
   0  -5   2 1371.46   55.29
   0   4  -2   83.59    5.20
   0   4  -2   82.59    4.00
   0  -4   2   78.89    4.30
   0  -3   2 5015.70  197.98
   0   3  -2 5267.57  199.58
   0  -2   2 2418.56   93.19
   0   2  -2 2108.19   87.39
   0   1   2   54.59    5.20
   0  -1  -2   37.60    4.70
   0   2   2 2335.77   90.89
   0   2   2 1947.51   83.19
   0  -2  -2 2174.58   83.39
   0   3   2 5029.10  199.28
   0  -3  -2 5262.17  198.58
   0   4   2   80.69    5.00
   0   4   2   82.79    4.00
   0   4   2   88.29    9.80
   0  -4  -2   67.49    4.10
   0   5   2 1447.46   59.39
   0   5   2 1480.55   57.69
   0  -5  -2 1487.85   57.99
   0   6   2    7.90    2.20
   0  -6  -2   10.20    1.70
   0   7   2   77.99    6.50
   0  -7  -2   81.69    5.10
   0   8   2   15.30    3.80
   0   9   2   46.70    2.50
   0   9   2   45.50    5.70
   0  10   2 1005.90   38.90
   0 -10  -2 1003.10   39.20
   0  11   2    2.90    0.50
   0 -11  -2    3.60    0.80
   0 -12  -2  204.18    8.50
   0  12   2  207.58    8.20
   0  13   2   28.60    1.40
   0 -13  -2   28.80    1.50
   1 -13   2   43.70    2.10
  -1 -13   2   44.70    2.10
   1 -12   2   32.60    1.80
  -1  12  -2   28.90    1.40
  -1  12  -2   27.80    1.80
  -1 -12   2   28.50    1.70
   1 -11   2  143.59    6.10
   1  11  -2  136.99    5.70
   1 -11   2  132.59    6.60
  -1  11  -2  145.19    5.80
  -1  11  -2  142.09    6.20
  -1 -11   2  148.19    6.80
  -1 -11   2  138.29    6.00
   1  10  -2   90.59    3.80
   1 -10   2   88.49    4.90
   1 -10   2   87.89    4.20
  -1 -10   2   91.59    4.10
  -1 -10   2   91.29    4.50
  -1  10  -2   91.19    3.90
   1  -9   2 1400.56   55.69
   1  -9   2 1368.36   55.99
   1  -9   2 1442.66   56.69
   1   9  -2 1458.75   55.39
  -1  -9   2 1370.66   55.59
  -1   9  -2 1485.25   69.49
  -1  -9   2 1529.35   56.09
  -1   9  -2 1433.46   55.39
   1  -8   2  271.87   12.90
   1  -8   2  267.37   10.90
  -1   8  -2  234.38   14.60
  -1  -8   2  255.37   10.90
   1   7  -2  307.17   14.40
   1  -7   2  372.46   15.60
   1   7  -2  309.17   17.40
  -1   7  -2  338.07   17.30
   1   6  -2  224.68   10.00
   1   6  -2  230.68   12.60
   1  -6   2  207.68   10.50
  -1   6  -2  206.18    9.70
  -1   6  -2  250.77   12.50
   1   5  -2  197.58    8.70
   1   5  -2  198.58   10.70
   1  -5   2  195.18    9.30
  -1   5  -2  197.88    8.50
  -1   5  -2  187.38   10.20
   1   4  -2 1172.98   48.40
   1  -4   2 1203.08   49.10
   1   4  -2 1327.57   50.69
   1   4  -2 1218.18   48.60
  -1   4  -2 1260.97   48.50
  -1   4  -2 1265.97   49.99
   1   3  -2 1271.17   49.90
   1  -3   2 1167.58   54.09
   1   3  -2 1240.48   49.80
   1  -3   2 1276.07   50.29
  -1   3  -2 1366.36   50.89
  -1   3  -2 1358.06   49.80
   1   2  -2 2859.81  107.19
   1   2  -2 2356.76  106.99
   1  -2   2 2879.01  107.59
  -1   2  -2 3015.30  107.29
  -1   0   2   13.70    3.50
  -1   0  -2   15.70    2.00
   1  -1  -2 2670.53  113.99
  -1  -1  -2 2848.52  113.19
  -1   1   2 2857.11  116.19
   1   2   2 2777.42  111.69
   1   2   2 3100.89  118.69
   1  -2  -2 2831.52  111.79
   1   2   2 2938.71  111.29
  -1   2   2 3000.20  119.29
  -1   2   2 2683.63  112.59
   1   3   2 1351.26   49.10
   1   3   2 1150.88   48.50
   1   3   2 1359.36   56.99
   1   3   2 1272.97   49.70
   1  -3  -2 1282.67   49.10
  -1   3   2 1122.89   56.59
  -1  -3  -2 1205.68   48.90
  -1   3   2 1181.58   48.80
  -1   3   2 1347.27   50.49
   1   4   2 1372.86   48.50
   1  -4  -2 1237.98   48.60
   1   4   2 1176.98   49.40
   1   4   2 1256.57   58.29
  -1   4   2 1231.98   58.69
  -1  -4  -2 1212.88   48.30
  -1   4   2 1125.79   48.10
   1  -5  -2  203.78    9.40
   1   5   2  195.58    9.10
   1   5   2  189.98   10.30
  -1   5   2  218.88   11.00
  -1  -5  -2  193.18    9.00
   1   6   2  210.98   10.20
   1   6   2  223.18   12.00
   1  -6  -2  223.08   10.50
  -1   6   2  228.38   12.10
   1   7   2  317.17   16.00
   1  -7  -2  263.37   13.70
  -1   7   2  319.47   16.10
   1  -8  -2  228.28   12.10
   1   8   2  253.47   14.60
  -1   8   2  257.57   14.70
   1   9   2 1388.56   54.19
   1  -9  -2 1470.45   54.59
   1   9   2 1335.17   60.39
   1  -9  -2 1398.96   57.39
  -1  -9  -2 1406.36   54.39
  -1   9   2 1425.46   54.29
   1 -10  -2   95.09    4.30
   1  10   2   87.59    3.90
  -1 -10  -2   85.79    4.10
  -1  10   2   92.29    3.90
   1 -11  -2  145.09    6.30
   1  11   2  147.89    6.00
  -1  11   2  141.79    6.00
  -1 -11  -2  148.29    6.30
   1  12   2   30.10    1.50
   1 -12  -2   29.60    1.80
  -1  12   2   31.90    1.60
  -1 -12  -2   33.20    1.80
   1 -13  -2   41.30    2.00
   1  13   2   41.80    1.80
  -1 -13  -2   39.10    2.00
  -1  13   2   42.10    1.80
   2 -12   2   24.80    1.60
  -2 -12   2   24.60    1.50
  -2  12  -2   23.90    1.60
   2 -11   2  181.18    7.50
  -2  11  -2  175.08    7.10
  -2 -11   2  170.78    7.30
   2  10  -2  173.78    7.00
   2 -10   2  179.38    7.50
   2 -10   2  178.28    8.20
  -2 -10   2  167.28    7.70
  -2  10  -2  184.38    7.20
  -2 -10   2  170.18    7.30
   2   9  -2   55.49    2.50
   2  -9   2   58.29    3.60
   2  -9   2   58.19    3.00
  -2  -9   2   57.19    3.30
  -2   9  -2   56.59    2.70
   2  -8   2  457.05   21.30
   2  -8   2  453.05   19.00
  -2   8  -2  454.95   23.50
  -2  -8   2  507.45   19.00
   2   7  -2  117.99    6.50
   2  -7   2  117.99    6.00
   2  -7   2  129.39    7.50
  -2   7  -2  124.49    8.80
  -2  -7   2  119.69    5.40
   2   6  -2  476.35   19.80
   2  -6   2  472.15   20.50
  -2   6  -2  455.05   21.80
   2  -5   2  254.87   11.00
   2   5  -2  218.28   10.20
   2   5  -2  222.38   10.20
  -2   5  -2  217.18   11.70
  -2   5  -2  223.08    9.80
   2   4  -2  687.53   26.80
   2   4  -2  659.13   26.70
   2  -4   2  670.83   27.20
  -2   4  -2  633.44   28.00
  -2   4  -2  657.93   26.40
   2  -3   2 1038.60   38.80
   2   3  -2 1015.00   38.30
   2   3  -2  897.81   38.20
   2  -3   2  925.01   37.70
  -2   3  -2  954.30   39.30
  -2   3  -2  981.00   38.00
   2   2  -2 2851.81  107.49
   2   2  -2 2800.52  107.49
   2  -2   2 2813.72  107.89
   2   2  -2 2596.84  106.99
   2  -2   2 2745.53  107.09
  -2   2  -2 2864.51  107.39
  -2   2  -2 2777.12  108.19
   2   0   2   11.60    1.30
   2   0   2    9.50    1.10
   2   0   2    9.50    1.10
   2   0  -2   12.20    1.00
  -2   0  -2   10.00    2.00
  -2   0   2    8.10    1.90
  -2   0   2    9.90    3.70
  -2   1   2 9709.73  375.56
   2   2   2 2788.52  106.59
   2  -2  -2 2652.63  106.29
   2  -2  -2 2843.32  105.99
   2   2   2 2700.83  106.09
  -2   2   2 2752.42  116.39
  -2   2   2 2746.43  108.29
   2   3   2  922.91   38.70
   2  -3  -2  950.90   39.20
   2   3   2 1083.29   39.50
  -2   3   2  948.81   41.00
  -2   3   2 1048.40   49.60
   2   4   2  719.13   27.50
   2   4   2  563.04   27.50
   2  -4  -2  713.53   27.40
  -2   4   2  677.23   37.90
  -2   4   2  680.23   29.20
   2  -5  -2  236.08   10.50
   2   5   2  195.98   11.30
   2   5   2  221.68   10.30
  -2   5   2  226.48   12.10
   2   6   2  487.15   21.00
   2  -6  -2  464.55   21.10
  -2   6   2  522.55   23.60
   2  -7  -2  109.79    6.70
  -2   7   2  110.49    8.30
   2  -8  -2  464.35   20.20
  -2   8   2  408.26   22.10
   2  -9  -2   57.59    3.00
   2   9   2   57.19    2.60
  -2   9   2   56.39    2.70
   2  10   2  174.58    7.30
   2 -10  -2  183.58    7.70
  -2  10   2  180.18    7.40
  -2 -10  -2  178.38    7.50
   2  11   2  178.98    7.20
   2 -11  -2  175.48    7.50
  -2  11   2  178.38    7.30
  -2 -11  -2  179.68    7.50
   2  12   2   27.60    1.30
   2 -12  -2   24.50    1.60
  -2  12   2   24.90    1.40
   3 -12   2  126.29    5.30
  -3  12  -2  128.79    5.40
  -3 -12   2  121.49    5.20
   3 -11   2   64.59    3.10
  -3  11  -2   63.29    3.20
  -3 -11   2   60.09    2.90
   3 -10   2  529.85   20.30
   3  10  -2  508.05   19.90
  -3 -10   2  484.25   20.40
  -3 -10   2  506.55   20.00
   3  -9   2  167.48    7.00
   3   9  -2  159.58    6.40
  -3   9  -2  166.88    6.60
  -3  -9   2  141.89    7.20
   3  -8   2  720.73   30.40
   3  -8   2  751.32   29.40
  -3  -8   2  748.33   29.70
  -3   8  -2  713.13   34.40
  -3   8  -2  795.02   29.10
   3  -7   2   96.39    6.50
  -3   7  -2   91.39    7.50
  -3  -7   2   88.39    4.40
   3  -6   2  253.17   12.50
  -3   6  -2  251.57   13.80
   3  -5   2  422.06   17.80
   3   5  -2  385.66   17.20
  -3   5  -2  387.66   16.50
  -3   5  -2  388.46   18.80
   3   4  -2 1018.50   41.30
   3  -4   2 1044.70   41.80
  -3   4  -2 1021.80   42.90
  -3   4  -2 1039.30   40.80
   3  -3   2  951.30   37.50
   3   3  -2  985.00   38.30
   3   3  -2  866.71   37.40
   3  -3   2  968.40   38.50
  -3   3  -2  980.30   37.80
  -3   3  -2  976.60   39.40
   3  -2   2 1649.44   63.89
   3   2  -2 1582.04   63.79
   3   2  -2 1707.03   64.49
   3  -2   2 1578.74   64.49
  -3   2  -2 1692.73   64.09
   3   1  -2  822.62   30.90
   3   1  -2  783.32   30.40
   3  -1   2  773.72   30.50
   3  -1   2  737.43   30.80
   3  -1   2  706.23   30.40
  -3  -1   2  784.02   42.30
   3   0  -2 6737.03  251.47
   3   0   2 6749.62  251.87
   3   0   2 6304.27  252.07
   3   0   2 6254.37  252.07
  -3   0   2 6633.64  267.57
   3   1   2  787.42   31.10
   3   1   2  761.72   31.40
   3  -1  -2  796.82   30.90
  -3   1   2  763.72   33.60
  -3   1   2  800.52   42.30
   3  -2  -2 1662.63   65.49
   3  -2  -2 1682.43   65.19
   3   2   2 1776.02   65.49
   3   2   2 1756.52   65.89
  -3   2   2 1744.53   68.39
  -3   2   2 1436.86   76.19
   3  -3  -2  916.71   39.40
   3   3   2 1105.69   40.00
   3   3   2 1023.40   39.20
   3  -3  -2 1000.40   38.90
  -3   3   2 1046.20   51.99
  -3   3   2  852.51   41.60
   3   4   2 1052.69   40.80
   3  -4  -2 1068.49   41.60
   3   4   2  949.21   41.50
  -3   4   2 1061.29   44.20
   3  -5  -2  389.76   17.40
   3   5   2  390.96   17.50
  -3   5   2  408.56   19.90
   3  -6  -2  253.77   12.10
   3   6   2  238.58   11.90
  -3   6   2  242.38   14.20
   3  -7  -2   75.39    5.50
   3   7   2   78.69    5.50
  -3   7   2   89.89    7.70
   3  -8  -2  793.82   34.20
   3   8   2  767.82   29.90
  -3   8   2  764.42   38.30
  -3   8   2  753.02   30.20
   3  -9  -2  163.88    7.10
   3   9   2  161.58    6.80
  -3   9   2  170.78    6.90
   3 -10  -2  531.45   21.10
   3  10   2  512.15   20.70
  -3  10   2  525.75   20.80
  -3 -10  -2  548.25   20.90
   3 -11  -2   60.39    3.10
   3  11   2   64.79    2.80
  -3 -11  -2   63.69    3.00
  -3  11   2   64.69    2.90
   3  12   2  129.19    5.20
  -3 -12  -2  129.89    5.40
   4 -11   2  112.39    4.80
  -4 -11   2  107.59    4.60
  -4  11  -2  110.09    4.90
   4 -10   2   10.70    1.20
  -4  10  -2    9.80    1.20
  -4  -9   2   76.29    4.30
  -4   9  -2   95.49    4.00
   4   8  -2  199.28    8.00
   4  -8   2  208.28    8.60
  -4   8  -2  199.28    8.40
  -4  -8   2  197.98    8.80
   4  -7   2   98.59    7.10
  -4  -7   2  106.79    5.00
   4  -6   2  271.07   13.60
   4   6  -2  242.38   12.80
  -4  -6   2  291.07   11.30
   4  -5   2   56.69    4.50
   4   5  -2   51.39    4.10
  -4  -5   2   60.09    2.90
   4  -4   2  393.06   17.60
   4   4  -2  388.56   17.40
  -4   4  -2  396.16   16.60
   4   3  -2   18.20    2.20
   4  -3   2   19.00    1.80
   4  -3   2   16.90    2.10
   4   3  -2   15.40    1.60
  -4   3  -2   14.80    1.70
   4  -2   2  181.08    8.30
   4  -2   2  166.98    8.60
   4   2  -2  181.58    8.80
   4   2  -2  183.08    8.20
  -4  -2   2  193.88   11.50
  -4   2  -2  179.08    8.40
   4   1  -2  541.65   22.10
   4  -1   2  517.95   21.60
   4   1  -2  519.15   21.50
  -4  -1   2  535.45   25.00
   4   0   2  164.48    8.10
   4   0   2  180.08    8.00
   4   0  -2  177.28    7.80
  -4   0   2  157.98   10.40
   4   1   2  569.14   21.90
   4  -1  -2  504.15   21.50
   4   1   2  527.55   22.20
  -4   1   2  521.05   25.00
   4   2   2  196.68    8.70
   4   2   2  183.78    9.20
   4  -2  -2  178.38    8.30
  -4   2   2  190.28   11.60
   4   3   2   15.70    1.80
   4  -3  -2   16.80    1.70
   4   3   2   15.10    2.10
  -4   3   2   18.00    3.40
   4   4   2  396.46   17.20
   4   4   2  408.46   18.30
   4  -4  -2  397.26   17.80
   4  -4  -2  401.26   16.90
  -4   4   2  436.26   21.10
   4   5   2   60.59    4.60
   4  -5  -2   63.19    4.50
  -4   5   2   51.99    5.90
   4   6   2  266.07   13.40
   4  -6  -2  270.27   13.20
  -4   6   2  270.87   16.00
   4   7   2   82.79    6.00
   4   7   2   86.19    3.70
   4  -7  -2   89.09    6.20
  -4   7   2   80.69    4.50
  -4   7   2   84.39    8.00
   4   8   2  199.08    8.00
  -4   8   2  195.88    8.30
  -4   8   2  196.78    8.30
   4   9   2  115.89    4.60
  -4   9   2  111.49    4.70
  -4   9   2  100.79    4.80
   4 -10  -2    7.80    0.80
   4  10   2    8.10    0.70
   4  11   2  115.99    4.50
   4 -11  -2  103.49    4.60
  -4 -11  -2  109.49    4.70
  -5  11  -2  115.09    4.90
   5 -10   2  189.68    7.50
  -5  10  -2  177.78    7.50
  -5  10  -2  170.58    7.30
   5  -9   2   10.80    1.20
  -5   9  -2    7.60    0.90
  -5   9  -2    9.40    1.20
   5  -8   2  360.16   14.50
  -5   8  -2  354.86   14.50
  -5  -8   2  344.17   14.70
  -5   8  -2  367.76   14.40
   5   7  -2  350.26   13.60
   5  -7   2  347.77   14.10
  -5   7  -2  368.66   14.00
  -5  -7   2  318.27   14.30
   5   6  -2   45.40    2.00
   5  -6   2   41.90    2.50
  -5   6  -2   42.80    2.30
  -5  -6   2   40.70    2.50
   5  -5   2  315.07   15.40
  -5  -5   2  321.17   13.10
  -5  -4   2  270.47   17.10
  -5  -4   2  280.57   11.40
   5  -3   2   85.29    4.80
   5   3  -2   85.19    5.60
   5   3  -2   84.79    4.80
  -5  -3   2   81.69    8.10
  -5  -3   2   86.09    4.00
  -5   3  -2   83.99    5.00
   5   2  -2  218.58    9.90
   5  -2   2  227.58   10.10
   5   2  -2  216.08   10.70
  -5   2  -2  215.88   10.20
  -5  -2   2  203.18   13.60
   5  -1   2  212.18   10.00
   5   1  -2  220.28    9.90
   5   0   2 1681.83   65.99
   5   0  -2 1740.73   65.79
  -5   0   2 1595.54   70.29
   5   1   2  222.68   10.20
   5  -1  -2  208.18    9.80
   5   1   2  217.38   10.60
  -5   1   2  214.98   13.60
   5   2   2  204.38   10.00
   5   2   2  213.98   10.80
   5  -2  -2  224.78    9.90
  -5   2   2  215.78   13.70
   5   3   2   79.39    4.90
   5   3   2   91.59    5.80
   5  -3  -2   86.89    4.80
  -5   3   2   77.29    7.50
   5  -4  -2  261.17   11.90
   5   4   2  260.47   13.30
  -5   4   2  288.67   16.40
   5   5   2  331.87   15.30
  -5   5   2  285.57   17.50
   5  -6  -2   41.70    2.20
   5   6   2   41.00    2.10
  -5   6   2   44.40    2.40
  -5   6   2   43.20    2.40
   5   7   2  357.26   14.00
   5  -7  -2  341.67   14.10
  -5   7   2  354.16   14.30
  -5   7   2  358.86   14.30
   5  -8  -2  363.56   14.50
   5   8   2  369.16   14.30
  -5   8   2  350.56   14.60
  -5   8   2  371.16   14.70
   5   9   2    8.60    0.70
   5  -9  -2    4.80    0.70
  -5   9   2    8.20    1.00
   5  10   2  192.38    7.30
   5 -10  -2  179.38    7.40
  -5  10   2  178.78    7.50
   5  11   2  116.99    4.70
  -5  11   2  118.19    5.00
   6  -9   2   43.30    2.30
  -6   9  -2   43.90    2.20
   6  -8   2   85.49    4.00
  -6   8  -2   85.89    3.90
   6  -7   2   10.20    1.20
  -6  -7   2    7.20    1.30
  -6   7  -2    9.60    1.00
   6   6  -2  102.39    4.30
   6  -6   2  103.79    4.80
  -6   6  -2  102.79    4.70
  -6  -6   2  104.89    5.00
   6  -5   2   40.50    2.40
   6   5  -2   42.50    2.00
  -6   5  -2   40.00    2.30
  -6  -5   2   45.30    2.60
   6   4  -2   84.59    3.50
   6  -4   2   79.79    4.00
  -6   4  -2   82.09    3.90
  -6  -4   2   82.69    4.10
   6  -3   2  106.39    6.00
  -6   3  -2  100.59    6.20
  -6  -3   2  109.49    5.00
   6   2  -2  159.48    8.10
   6  -2   2  171.58    8.30
  -6   2  -2  155.58    8.30
  -6  -2   2  156.38    7.00
   6   1  -2 1469.55   57.09
   6  -1   2 1438.16   57.19
  -6  -1   2 1416.16   55.79
  -6   1  -2 1407.86   57.39
   6   0   2    2.20    1.20
   6   0  -2    3.00    1.10
  -6   0   2    3.40    2.50
  -6   0   2    4.10    0.90
   6  -1  -2 1441.66   55.99
   6   1   2 1415.86   56.29
  -6   1   2 1361.16   61.29
   6   2   2  161.98    9.00
   6  -2  -2  163.38    8.10
   6   2   2  165.18    8.30
  -6   2   2  144.89   11.50
   6  -3  -2  117.19    5.00
   6   3   2  117.99    7.40
   6  -3  -2  108.29    6.20
   6   3   2  108.89    6.40
   6   3   2  116.09    5.00
  -6   3   2  113.19    9.70
  -6   3   2  126.49    6.00
   6   4   2   89.79    3.80
   6  -4  -2   89.79    3.90
  -6  -4  -2   82.09    4.00
  -6   4   2   85.99    4.00
  -6   4   2   89.09    4.10
   6  -5  -2   44.50    2.20
   6   5   2   41.80    2.10
  -6   5   2   44.70    2.40
  -6   5   2   45.10    2.40
   6  -6  -2  109.99    4.80
   6   6   2  111.69    4.70
  -6   6   2  114.59    5.10
  -6   6   2  112.49    5.00
   6   7   2   10.40    0.90
   6  -7  -2   11.20    1.00
  -6   7   2   11.70    1.10
  -6   7   2   10.50    1.20
   6  -8  -2   84.89    3.90
   6   8   2   91.19    3.80
  -6   8   2   91.69    4.10
   6  -9  -2   45.20    2.20
   6   9   2   48.60    2.10
  -6   9   2   48.00    2.40
  -7   8  -2  196.98    8.00
   7  -7   2  245.48   10.50
  -7   7  -2  271.27   10.50
   7  -6   2  459.05   18.20
   7  -6   2  441.86   18.40
  -7   6  -2  490.65   18.50
   7   5  -2  162.98    6.40
   7  -5   2  151.18    7.00
   7  -5   2  162.28    6.60
  -7   5  -2  161.88    6.80
   7   4  -2  284.47   11.40
   7  -4   2  289.07   11.60
  -7   4  -2  295.57   11.80
   7  -3   2  420.66   16.70
   7   3  -2  416.96   16.60
  -7  -3   2  430.66   17.00
   7   2  -2   64.89    2.90
   7  -2   2   63.19    3.00
  -7  -2   2   64.79    3.30
  -7  -2   2   70.79    3.10
  -7   2  -2   60.29    3.10
  -7   2  -2   62.89    3.20
   7  -1   2   20.20    1.30
   7   1  -2   18.20    1.20
  -7  -1   2   19.10    1.50
  -7   1  -2   16.80    1.30
  -7  -1   2   20.80    1.40
  -7   1  -2   20.00    1.50
   7   0  -2  265.47   10.30
   7   0   2  266.07   10.40
  -7   0   2  250.77   10.70
  -7   0   2  266.07   10.60
  -7   0  -2  258.87   10.70
  -7   0  -2  244.98   10.50
   7   1   2   22.60    1.30
   7  -1  -2   21.40    1.30
  -7  -1  -2   20.70    1.50
  -7   1   2   20.50    1.60
  -7   1   2   18.60    1.50
   7   2   2   69.69    3.10
   7  -2  -2   68.79    3.10
  -7   2   2   64.09    3.40
  -7   2   2   67.59    3.30
  -7  -2  -2   65.79    3.30
   7  -3  -2  423.96   16.90
   7   3   2  432.36   16.90
  -7   3   2  432.86   17.20
  -7   3   2  414.96   17.20
  -7  -3  -2  442.06   17.20
   7  -4  -2  294.17   11.90
   7   4   2  301.97   11.90
  -7   4   2  305.97   12.20
  -7   4   2  291.47   12.10
  -7  -4  -2  302.67   12.20
   7  -5  -2  170.78    7.00
   7   5   2  171.88    7.00
  -7   5   2  170.68    7.20
  -7   5   2  169.28    7.20
   7  -6  -2  487.05   19.40
   7   6   2  491.65   19.30
  -7   6   2  496.55   19.60
  -7   6   2  498.85   19.50
   7   7   2  275.47   10.70
   7  -7  -2  265.67   10.80
  -7   7   2  264.37   10.90
  -7   7   2  276.97   11.00
   7  -8  -2  197.48    8.00
   7   8   2  199.58    7.90
  -7   8   2  203.98    8.10
   8  -6   2   14.50    0.90
  -8   6  -2   13.80    1.00
   8  -5   2  115.99    4.80
  -8   5  -2  117.99    4.90
   8  -4   2   21.10    1.20
   8  -3   2   62.49    2.80
   8   3  -2   63.49    2.60
  -8   3  -2   53.09    3.20
  -8  -3   2   62.49    2.90
   8   2  -2   48.70    2.10
   8  -2   2   47.40    2.20
  -8   2  -2   37.90    2.30
  -8  -2   2   48.10    2.50
  -8   2  -2   46.20    2.40
   8  -1   2   95.89    4.20
   8   1  -2   97.59    4.20
  -8  -1   2   99.19    4.50
  -8   1  -2   99.99    4.50
  -8  -1   2  103.69    4.40
   8   0  -2   70.89    3.10
   8   0   2   66.29    3.10
  -8   0   2   70.09    3.40
  -8   0   2   68.89    3.30
  -8   0  -2   73.19    3.40
   8   1   2   96.79    4.20
   8  -1  -2  101.29    4.10
  -8  -1  -2   99.09    4.50
  -8   1   2   97.09    4.30
  -8   1   2   94.59    4.50
   8  -2  -2   48.80    2.30
   8   2   2   47.00    2.30
  -8   2   2   48.80    2.60
  -8   2   2   50.59    2.50
  -8  -2  -2   48.40    2.50
   8   3   2   63.99    2.90
   8  -3  -2   65.79    2.90
  -8   3   2   66.29    3.10
  -8  -3  -2   64.79    3.10
  -8   3   2   67.99    3.20
   8   4   2   21.20    1.20
   8  -4  -2   21.60    1.20
  -8  -4  -2   21.40    1.40
  -8   4   2   20.50    1.40
   8  -5  -2  126.09    5.20
   8   5   2  133.49    5.20
  -8   5   2  125.59    5.40
   8  -6  -2   14.60    0.90
   8   6   2   15.90    0.80
  -8   6   2   13.80    1.00
  -8   6   2   15.60    1.00
   9  -2   2  625.14   23.80
  -9   2  -2  595.84   23.90
  -9  -2   2  624.04   24.00
   9   1  -2  199.18    8.20
   9  -1   2  214.28    8.30
  -9  -1   2  217.98    8.50
  -9   1  -2  205.68    8.50
   9   0  -2  201.78    8.40
   9   0   2  215.28    8.50
  -9   0   2  219.58    8.70
  -9   0  -2  221.48    8.70
   9   1   2  218.88    8.40
   9  -1  -2  205.18    8.40
  -9   1   2  211.98    8.60
  -9  -1  -2  216.98    8.60
   9   2   2  630.24   23.70
   9  -2  -2  591.24   23.70
  -9   2   2  608.74   23.90
  -9   2   2  608.14   23.80
  -9  -2  -2  627.14   23.90
   0 -12   3    4.60    1.00
   0 -12   3    4.70    0.80
   0  11  -3    2.20    0.50
   0 -11   3    1.50    0.70
   0 -11   3    2.70    0.70
   0 -10   3    2.30    0.90
   0  10  -3    2.70    0.40
   0 -10   3    2.00    0.70
   0 -10   3    1.90    0.80
   0   9  -3   20.50    1.20
   0  -9   3   21.50    1.70
   0  -9   3   19.00    1.50
   0  -8   3   37.30    2.30
   0   8  -3   40.60    5.20
   0   7  -3    5.60    1.40
   0   7  -3    5.00    2.30
   0   6  -3 2430.36   96.29
   0   6  -3 2489.65   99.19
   0  -6   3 2504.05   96.89
   0   5  -3 4264.67  166.28
   0  -5   3 4256.57  166.68
   0   5  -3 4392.06  168.38
   0  -4   3  113.29    5.70
   0   4  -3  103.49    6.40
   0   4  -3  121.29    5.30
   0   3  -3  177.38    7.60
   0  -3   3  188.18    8.10
   0   3  -3  165.38    8.50
   0   2  -3 3529.35  139.09
   0   2  -3 3737.73  139.69
   0  -2   3 3548.74  139.19
   0   1  -3 1889.11   72.09
   0  -1   3 1848.62   76.49
   0  -1  -3 2016.20   73.19
   0   1   3 1763.82   73.09
   0   1   3 1883.41   78.79
   0   2   3 3495.85  139.79
   0   2   3 3437.66  130.29
   0  -2  -3 3174.08  129.99
   0   3   3  168.88    8.00
   0   3   3  193.88   14.70
   0  -3  -3  191.28    8.20
   0   3   3  179.98    8.80
   0   4   3  130.99   12.90
   0   4   3  113.19    6.60
   0  -4  -3  119.59    5.90
   0   4   3  115.89    5.70
   0   4   3  119.49    5.20
   0   5   3 4263.07  169.58
   0  -5  -3 4432.56  168.38
   0   5   3 4341.47  167.98
   0   6   3 2587.84  103.29
   0  -6  -3 2602.14  101.59
   0   7   3    5.70    2.20
   0  -7  -3    4.40    1.50
   0  -8  -3   36.90    3.60
   0   8   3   40.80    5.00
   0   9   3   19.10    1.20
   0  -9  -3   20.50    1.50
   0   9   3   15.40    4.90
   0  10   3    3.10    0.60
   0 -10  -3    2.20    0.80
   0  11   3    1.50    0.50
   0 -11  -3    1.70    0.70
   0 -12  -3    5.10    0.80
   0  12   3    4.70    0.60
   1 -12   3  123.39    5.30
  -1 -12   3  120.99    5.70
  -1 -12   3  124.69    5.20
   1 -11   3   92.39    4.10
   1 -11   3   93.69    4.80
  -1 -11   3   85.59    4.70
  -1 -11   3   81.39    4.30
  -1 -11   3   87.29    4.00
  -1  11  -3   90.99    4.20
  -1  11  -3   86.69    3.70
   1 -10   3  418.16   18.00
   1 -10   3  429.96   17.10
   1 -10   3  401.46   17.40
  -1 -10   3  443.26   17.50
  -1  10  -3  426.96   16.70
  -1  10  -3  437.76   17.30
  -1 -10   3  432.86   17.00
   1  -9   3   19.70    1.50
   1  -9   3   19.00    2.00
   1   9  -3   22.40    1.10
   1  -9   3   20.30    1.70
  -1  -9   3   22.10    1.40
  -1   9  -3   20.20    1.20
   1  -8   3   72.19    5.40
   1  -8   3   74.09    3.70
  -1  -8   3   70.49    3.70
  -1   8  -3   71.09    6.80
   1   7  -3  389.46   17.30
   1  -7   3  406.06   18.20
  -1   7  -3  417.96   20.30
   1  -6   3  211.48   10.40
   1   6  -3  213.58    9.80
  -1   6  -3  212.48    9.60
  -1   6  -3  218.38   11.90
   1   5  -3 1412.26   56.49
   1  -5   3 1455.15   57.19
  -1   5  -3 1464.25   58.39
  -1   5  -3 1418.66   56.29
   1  -4   3 1539.95   59.39
   1   4  -3 1509.85   58.69
  -1   4  -3 1505.55   58.59
  -1   4  -3 1451.15   59.99
   1   3  -3  615.34   22.90
   1  -3   3  606.64   23.50
   1   3  -3  575.04   22.70
  -1   3  -3  514.65   23.50
  -1  -3   3  504.15   22.70
  -1   3  -3  607.14   22.70
   1  -2   3  143.29    7.30
   1  -2   3  150.78    7.50
   1  -2   3  145.59    6.90
   1   2  -3  135.29    6.30
  -1   2  -3  151.98    6.30
   1  -1   3 1677.23   62.19
   1   1  -3 1586.94   62.19
  -1   1  -3 1515.15   62.19
  -1  -1   3 1648.54   69.89
  -1   0   3 9999.00  386.06
   1   1   3 1551.54   61.79
   1   1   3 1496.15   65.99
   1  -1  -3 1625.14   61.89
   1   1   3 1616.84   61.59
  -1   1   3 1703.63   63.19
  -1   1   3 1555.14   69.69
   1   2   3  138.49   10.70
   1  -2  -3  138.49    6.20
   1   2   3  135.89    6.10
   1   2   3  128.89    5.80
  -1  -2  -3  134.19    6.10
  -1   2   3  131.29    7.20
  -1   2   3  136.29   11.80
   1   3   3  507.55   22.50
   1   3   3  572.54   23.00
   1   3   3  542.05   30.00
   1  -3  -3  547.25   22.60
   1   3   3  571.84   22.20
  -1   3   3  566.94   23.90
  -1   3   3  584.34   31.90
  -1  -3  -3  573.94   22.60
  -1   3   3  563.94   22.50
   1   4   3 1503.35   67.19
   1   4   3 1462.55   56.39
   1   4   3 1381.26   57.09
   1   4   3 1402.56   55.69
   1  -4  -3 1475.95   56.59
  -1   4   3 1464.95   56.19
  -1  -4  -3 1342.67   56.29
  -1   4   3 1355.66   67.79
  -1   4   3 1519.45   58.09
   1   5   3 1464.55   58.59
   1   5   3 1514.65   57.29
   1  -5  -3 1455.45   57.49
  -1   5   3 1450.75   59.19
  -1   5   3 1313.67   56.89
  -1  -5  -3 1501.85   57.29
   1   6   3  195.28   11.20
   1  -6  -3  233.58   10.40
   1   6   3  205.78    9.90
  -1   6   3  207.48   11.70
  -1  -6  -3  205.18   10.40
   1  -7  -3  361.56   17.20
   1   7   3  371.76   19.00
  -1   7   3  418.16   19.70
   1  -8  -3   62.99    5.00
   1   8   3   58.69    7.50
  -1   8   3   67.39    6.50
   1   9   3   21.80    1.30
   1  -9  -3   20.10    1.60
  -1   9   3   20.50    1.30
  -1  -9  -3   19.70    1.50
   1 -10  -3  442.36   17.30
   1  10   3  414.56   16.90
  -1  10   3  428.36   17.00
  -1 -10  -3  436.66   17.20
   1 -11  -3   91.29    4.20
   1  11   3   90.49    3.90
  -1  11   3   92.99    4.00
  -1 -11  -3   94.59    4.20
   1 -12  -3  118.29    5.20
   1  12   3  126.49    5.00
  -1  12   3  122.29    5.10
  -1 -12  -3  123.69    5.20
   2 -12   3   59.69    2.80
  -2 -12   3   57.69    2.70
  -2 -12   3   54.59    3.00
  -2  12  -3   59.29    2.80
   2 -11   3  219.98    8.80
  -2  11  -3  224.68    8.90
  -2 -11   3  185.08    8.80
  -2 -11   3  209.98    8.60
   2 -10   3  112.49    5.70
   2 -10   3  103.49    4.90
  -2  10  -3  109.49    5.10
  -2 -10   3  105.49    5.10
  -2 -10   3  106.99    4.70
  -2  10  -3  107.69    4.50
   2  -9   3   21.20    2.10
   2  -9   3   18.70    1.70
   2  -9   3   18.60    1.50
  -2   9  -3   19.50    1.20
  -2  -9   3   23.00    1.90
  -2  -9   3   21.50    1.40
   2  -8   3   97.49    4.80
   2  -8   3  100.59    6.90
  -2   8  -3  100.19    8.30
  -2  -8   3  102.29    4.80
   2   7  -3  247.08   12.10
   2  -7   3  250.37   10.90
   2  -7   3  275.17   13.10
  -2   7  -3  272.67   14.80
  -2  -7   3  260.77   10.80
   2  -6   3  193.28   10.20
   2   6  -3  197.58    9.50
  -2   6  -3  193.38    9.10
  -2   6  -3  216.38   11.70
   2   5  -3 1812.12   72.49
   2  -5   3 1874.21   73.29
  -2   5  -3 1914.61   74.39
  -2   5  -3 1791.32   72.09
   2  -4   3  208.28   10.60
   2   4  -3  234.78   10.20
   2   4  -3  262.97   10.20
  -2   4  -3  222.98    9.90
  -2   4  -3  213.78   11.10
   2   3  -3   14.20    1.50
   2  -3   3   17.10    2.00
   2   3  -3   10.70    1.40
   2  -3   3   11.70    1.70
  -2   3  -3   14.30    1.30
  -2   3  -3   14.20    1.80
   2   2  -3 1219.08   45.90
   2   2  -3 1142.09   45.80
   2  -2   3 1105.49   45.50
   2   2  -3 1176.88   45.40
   2  -2   3 1176.18   46.40
  -2   2  -3 1189.48   45.70
   2   1  -3 2914.41  110.09
   2   1  -3 2562.84  109.79
   2  -1   3 3062.39  110.09
   2  -1   3 2736.63  110.59
  -2   1  -3 2970.20  110.19
  -2  -1   3 2857.11  121.19
   2   0   3 2213.68   86.39
   2   0   3 2264.17   86.29
   2   0  -3 2190.68   86.09
  -2   0  -3 2323.77   90.89
  -2   0   3 2293.27   88.39
  -2   0   3 2095.89   96.59
   2   1   3 3028.50  115.19
   2  -1  -3 2945.81  115.09
   2  -1  -3 3054.79  114.89
   2   1   3 2966.50  115.29
  -2  -1  -3 2817.32  120.09
  -2   1   3 2794.32  125.69
  -2   1   3 3251.87  117.39
   2   2   3 1197.28   46.40
   2  -2  -3 1197.48   46.30
   2   2   3 1131.39   46.00
  -2   2   3 1243.68   48.60
  -2   2   3 1120.19   56.89
   2   3   3   11.40    1.30
   2   3   3   12.80    1.60
   2   3   3   14.30    4.30
   2  -3  -3   15.70    1.70
  -2   3   3   13.20    2.50
  -2   3   3   15.60    5.00
   2   4   3  227.38    9.70
   2  -4  -3  231.18   10.30
   2   4   3  229.18   10.40
  -2   4   3  221.58   12.00
  -2   4   3  215.98    9.90
   2  -5  -3 1853.71   72.39
   2   5   3 1792.52   72.39
  -2   5   3 1854.81   74.69
   2  -6  -3  186.88    9.70
   2   6   3  202.78    9.70
  -2   6   3  187.68   11.50
   2   7   3  245.68   11.80
   2  -7  -3  229.38   11.90
  -2   7   3  245.48   14.10
   2  -8  -3   95.09    6.40
  -2   8   3   81.59    7.60
   2  -9  -3   20.60    1.60
   2   9   3   21.30    1.30
  -2   9   3   20.30    1.30
  -2  -9  -3   22.10    1.50
   2 -10  -3  111.09    5.00
   2  10   3  107.99    4.60
  -2 -10  -3  105.59    4.80
  -2  10   3  111.49    4.70
   2 -11  -3  215.98    9.20
   2  11   3  222.08    8.90
  -2 -11  -3  229.48    9.10
  -2  11   3  222.98    9.00
   2  12   3   61.99    2.60
  -2 -12  -3   57.79    2.80
  -2  12   3   59.49    2.60
   3 -12   3   89.39    4.00
  -3  12  -3   90.39    4.00
  -3 -12   3   91.99    3.80
   3 -11   3   23.60    1.60
  -3  11  -3   25.20    1.70
  -3 -11   3   22.60    1.40
   3 -10   3 1003.00   38.10
  -3 -10   3  993.30   37.80
  -3  10  -3  989.80   38.20
  -3 -10   3  909.11   38.30
   3  -9   3  166.68    7.00
   3  -9   3  159.28    7.70
  -3  -9   3  150.48    7.20
   3  -8   3  400.16   16.70
   3  -8   3  435.26   17.70
  -3  -8   3  402.86   16.90
  -3   8  -3  422.06   16.30
   3  -7   3  320.47   16.00
   3  -7   3  305.27   13.70
  -3  -7   3  365.36   13.60
   3  -6   3  195.48    8.50
   3  -6   3  184.88   10.10
  -3  -6   3  187.28    7.90
   3   5  -3  349.07   15.90
   3  -5   3  363.96   16.70
  -3   5  -3  379.46   15.50
   3  -4   3  314.67   13.90
   3   4  -3  285.97   13.20
  -3   4  -3  296.47   12.80
   3   3  -3  287.97   12.40
   3  -3   3  280.07   11.80
   3  -3   3  287.37   12.90
  -3   3  -3  270.67   12.00
   3  -2   3  684.93   27.70
   3   2  -3  722.23   28.20
   3  -2   3  698.53   28.60
   3   2  -3  687.23   27.50
  -3   2  -3  683.23   27.80
   3  -1   3 2750.32  110.69
   3   1  -3 2896.91  109.89
   3  -1   3 2860.91  110.09
  -3  -1   3 2781.72  124.89
  -3  -1   3 2932.11  113.19
   3   0   3 4039.20  163.38
   3   0   3 4192.68  163.28
   3   0  -3 4265.37  162.88
   3   0   3 4354.86  163.28
  -3   0   3 4099.89  177.78
  -3   0   3 4399.96  166.18
   3  -1  -3 2944.91  115.09
   3   1   3 3143.49  115.49
   3   1   3 2800.72  115.59
  -3   1   3 3142.09  118.59
  -3   1   3 2872.71  129.49
   3  -2  -3  694.33   28.00
   3   2   3  722.83   27.90
   3   2   3  654.53   28.20
   3  -2  -3  661.63   27.50
  -3   2   3  680.73   40.40
  -3   2   3  745.43   31.10
   3  -3  -3  274.67   12.60
   3   3   3  300.07   12.90
   3   3   3  282.97   12.20
  -3   3   3  286.17   15.10
   3   4   3  303.67   13.70
   3  -4  -3  310.47   13.60
   3   4   3  303.97   12.90
  -3   4   3  287.37   15.70
   3  -5  -3  379.56   16.80
   3   5   3  368.96   16.90
  -3   5   3  381.06   19.30
   3   6   3  186.28    9.70
   3  -6  -3  181.98    9.60
  -3   6   3  180.88   11.80
   3  -7  -3  268.57   13.80
   3   7   3  282.27   13.80
  -3   7   3  297.97   16.60
   3   8   3  399.86   15.00
  -3   8   3  368.96   15.20
  -3   8   3  372.76   15.20
   3   9   3  161.48    6.90
  -3   9   3  181.98    7.50
  -3   9   3  167.68    7.00
   3  10   3  999.10   38.90
  -3  10   3 1014.50   39.00
  -3 -10  -3 1004.80   39.10
   3  11   3   24.10    1.30
  -3  11   3   23.00    1.40
  -3 -11  -3   25.70    1.60
   3  12   3   89.79    3.60
   3 -12  -3   84.49    3.70
  -3 -12  -3   89.69    3.80
   4 -11   3   38.00    2.00
  -4 -11   3   36.90    1.90
  -4  11  -3   39.10    2.10
   4 -10   3   87.39    4.00
  -4 -10   3   78.79    4.10
  -4  10  -3   86.19    4.00
  -4 -10   3   88.29    3.80
   4  -9   3  329.17   13.40
  -4   9  -3  318.27   13.40
  -4  -9   3  331.97   13.70
   4  -8   3   36.00    2.20
  -4  -8   3   34.90    2.30
  -4   8  -3   33.70    2.00
   4  -7   3  274.57   11.40
   4  -7   3  273.97   12.20
  -4  -7   3  292.87   11.60
  -4   7  -3  262.17   11.20
   4  -6   3   55.59    4.80
  -4  -6   3   51.89    2.80
   4   5  -3   33.30    3.20
   4  -5   3   33.60    3.50
  -4   5  -3   31.80    2.70
  -4  -5   3   34.60    1.90
   4  -4   3  667.73   28.00
   4   4  -3  630.54   27.50
  -4   4  -3  673.93   27.00
   4  -3   3 1506.65   56.59
   4  -3   3 1456.95   57.69
   4   3  -3 1351.66   56.29
  -4   3  -3 1437.46   56.79
   4   2  -3  153.48    7.30
   4  -2   3  157.48    8.10
   4  -2   3  161.58    7.50
  -4   2  -3  162.38    7.70
  -4  -2   3  159.78   10.70
   4  -1   3 2180.08   85.09
   4   1  -3 2179.28   84.79
  -4  -1   3 2179.38   89.09
   4   0  -3   53.29    3.10
   4   0   3   46.50    3.20
  -4   0   3   48.10    5.30
   4   1   3 2226.28   85.39
   4   1   3 2207.08   85.89
   4  -1  -3 2233.48   85.09
  -4   1   3 2076.29   88.99
   4   2   3  158.08    7.70
   4   2   3  169.28    8.30
   4  -2  -3  156.48    7.40
  -4   2   3  157.98   10.70
   4   3   3 1382.76   58.29
   4  -3  -3 1425.26   57.19
   4   3   3 1503.05   57.69
  -4   3   3 1522.75   61.89
   4   4   3  628.54   26.30
   4  -4  -3  652.43   27.00
   4   4   3  619.44   27.30
  -4   4   3  665.53   30.50
   4  -5  -3   40.00    3.50
   4   5   3   29.80    3.40
  -4   5   3   44.50    5.40
   4  -6  -3   51.69    4.40
   4   6   3   52.69    4.60
  -4   6   3   52.49    6.10
   4   7   3  262.07   10.80
  -4   7   3  274.97   11.10
  -4   7   3  274.67   11.10
   4   8   3   35.50    1.80
  -4   8   3   36.20    2.10
  -4   8   3   34.30    2.10
   4   9   3  322.67   12.80
  -4   9   3  316.67   12.90
  -4   9   3  338.67   13.10
  -4   9   3  317.77   13.10
   4  10   3   90.39    3.80
   4 -10  -3   85.19    3.90
  -4 -10  -3   92.99    4.00
   4  11   3   38.90    1.80
   4 -11  -3   37.20    1.90
  -4 -11  -3   40.40    2.00
   5 -10   3  330.87   13.10
  -5  10  -3  316.47   13.10
  -5 -10   3  329.57   12.90
   5  -9   3  122.49    5.30
  -5   9  -3  116.09    5.10
  -5   9  -3  117.09    5.30
   5  -8   3  127.79    5.80
  -5   8  -3  125.19    5.70
  -5   8  -3  128.19    5.80
  -5  -8   3  139.59    6.10
   5  -7   3  254.37   10.70
  -5  -7   3  263.47   11.00
  -5   7  -3  252.57   10.60
   5  -6   3  119.79    5.60
  -5  -6   3  129.89    5.80
  -5   6  -3  121.99    5.50
   5  -5   3  314.17   15.30
  -5  -5   3  310.07   12.80
  -5  -4   3   88.39    8.90
  -5  -4   3   89.49    4.10
  -5   4  -3   81.19    5.00
   5  -3   3  891.21   37.60
  -5  -3   3  905.91   43.20
  -5   3  -3  948.91   38.00
  -5  -3   3  986.20   36.60
   5   2  -3  222.58   10.10
   5  -2   3  225.88   10.30
  -5  -2   3  217.58    9.20
  -5  -2   3  207.08   14.20
  -5   2  -3  224.98   10.40
   5   1  -3  485.45   20.00
   5  -1   3  499.25   20.40
  -5  -1   3  448.96   24.40
  -5   1  -3  477.65   20.40
   5   0   3  737.73   31.30
   5   0  -3  763.52   31.00
  -5   0   3  799.32   36.20
   5   1   3  490.15   21.20
   5   1   3  486.15   20.80
   5  -1  -3  493.75   20.40
  -5   1   3  483.15   25.00
   5   2   3  216.78   10.50
   5  -2  -3  215.28   10.10
   5   2   3  224.98   11.10
  -5   2   3  229.28    9.40
  -5   2   3  220.28   14.20
   5   3   3  901.11   37.20
   5   3   3  966.50   38.40
   5  -3  -3  917.21   36.80
  -5   3   3  912.01   36.00
  -5   3   3  884.61   41.70
   5   4   3   76.69    5.00
   5   4   3   85.29    6.00
  -5   4   3  106.79    8.90
   5   5   3  300.67   15.30
  -5   5   3  324.87   18.40
   5  -6  -3  124.19    5.30
   5   6   3  121.89    5.20
  -5   6   3  129.19    5.50
  -5   6   3  118.29    5.50
   5  -7  -3  254.57   10.30
   5   7   3  257.47   10.20
  -5   7   3  250.47   10.50
  -5   7   3  257.17   10.50
   5  -8  -3  131.19    5.60
   5   8   3  130.79    5.50
  -5   8   3  130.19    5.80
  -5   8   3  134.79    5.80
   5   9   3  122.29    4.90
   5  -9  -3  112.39    4.90
  -5   9   3  112.09    5.10
  -5   9   3  119.19    5.10
   5 -10  -3  323.97   13.50
   5  10   3  351.86   13.40
  -5  10   3  344.17   13.60
  -5 -10  -3  347.17   13.50
   6  -9   3  186.88    7.80
  -6   9  -3  192.98    7.80
   6  -8   3  107.69    4.80
  -6   8  -3  102.69    4.60
   6  -7   3   14.50    1.40
  -6  -7   3   13.50    1.40
  -6   7  -3   14.70    1.20
   6  -6   3  188.68    7.80
  -6   6  -3  181.68    7.70
  -6  -6   3  176.48    8.00
   6  -5   3  131.09    6.00
  -6   5  -3  136.99    5.90
   6  -4   3  455.25   18.80
   6   4  -3  466.25   18.30
  -6   4  -3  465.45   18.70
  -6  -4   3  488.35   18.90
   6   3  -3  244.18    9.50
   6  -3   3  237.88    9.90
  -6   3  -3  237.88    9.80
  -6  -3   3  239.38   10.00
  -6  -3   3  220.98   10.50
  -6   3  -3  226.38   12.70
  -6  -3   3  245.88   10.60
  -6  -3   3  246.48    9.70
   6   2  -3  208.28    9.90
   6  -2   3  200.08   10.00
  -6  -2   3  209.08    8.80
  -6  -2   3  210.48   14.80
  -6   2  -3  199.28   10.20
   6   1  -3  658.23   27.20
   6  -1   3  670.03   27.50
  -6  -1   3  634.84   32.80
  -6   1  -3  626.34   27.50
  -6  -1   3  680.83   26.10
   6   0   3  288.27   13.70
   6   0  -3  301.77   13.40
  -6   0   3  310.67   12.40
  -6   0   3  283.37   18.10
   6   1   3  656.03   27.60
   6  -1  -3  642.54   27.20
  -6   1   3  692.93   26.20
  -6   1   3  628.34   32.50
   6   2   3  205.08   10.80
   6  -2  -3  191.58    9.60
   6   2   3  203.08   10.10
  -6   2   3  206.98   14.20
   6   3   3  261.37   10.20
   6  -3  -3  261.27   10.20
  -6   3   3  259.77   10.50
  -6  -3  -3  250.07   10.40
  -6   3   3  236.98   11.00
   6  -4  -3  492.15   18.90
   6   4   3  477.95   18.90
  -6   4   3  467.85   19.10
  -6  -4  -3  477.65   19.10
  -6   4   3  487.45   19.20
   6  -5  -3  142.39    5.80
   6   5   3  141.29    5.80
  -6   5   3  132.79    6.00
  -6   5   3  137.39    6.10
   6  -6  -3  185.68    7.80
   6   6   3  187.58    7.80
  -6   6   3  198.78    8.10
  -6   6   3  189.38    8.10
   6  -7  -3   15.00    1.10
   6   7   3   13.60    1.00
  -6   7   3   15.20    1.30
  -6   7   3   15.50    1.30
   6   8   3  115.19    4.60
   6  -8  -3  107.59    4.70
  -6   8   3  102.79    4.80
  -6   8   3  113.09    4.90
   6   9   3  207.78    8.10
   6  -9  -3  198.98    8.20
  -6   9   3  208.68    8.40
   7  -8   3   57.59    2.70
  -7   8  -3   61.19    2.70
   7  -7   3   78.49    3.70
  -7   7  -3   86.59    3.70
   7  -6   3  284.77   11.70
  -7   6  -3  292.07   11.70
   7  -5   3  161.68    6.80
  -7  -5   3  143.29    6.90
  -7   5  -3  170.48    6.80
   7  -4   3   19.40    1.40
  -7  -4   3   12.80    1.30
  -7   4  -3   16.60    1.30
   7   3  -3  276.27   10.80
   7  -3   3  253.77   11.20
   7  -3   3  279.27   11.00
  -7  -3   3  273.27   11.40
  -7  -3   3  287.67   11.30
  -7   3  -3  267.37   11.10
   7  -2   3   99.89    4.30
   7  -2   3   91.09    4.50
   7   2  -3  102.59    4.10
  -7   2  -3   95.19    4.50
  -7  -2   3  105.89    4.40
  -7  -2   3  100.29    4.60
  -7  -2   3   96.09    4.60
   7  -1   3   53.69    2.60
   7   1  -3   54.59    2.40
  -7   1  -3   52.59    2.80
  -7  -1   3   48.90    2.90
  -7  -1   3   57.69    2.70
  -7  -1   3   55.39    3.10
   7   0  -3    5.20    0.60
   7   0   3    4.20    0.60
  -7   0   3    3.90    0.90
  -7   0   3    5.70    0.90
  -7   0  -3    5.30    0.90
  -7   0   3    4.40    0.80
   7   1   3   55.89    2.60
   7  -1  -3   52.89    2.50
  -7  -1  -3   53.69    2.80
  -7   1   3   52.89    3.30
  -7   1   3   56.89    2.80
  -7   1   3   53.29    2.90
   7  -2  -3  101.49    4.40
   7   2   3  105.99    4.50
  -7  -2  -3  101.49    4.70
  -7   2   3  103.29    4.80
  -7   2   3  100.69    5.10
  -7   2   3  104.69    4.70
   7  -3  -3  286.97   11.50
   7   3   3  284.27   11.50
  -7  -3  -3  292.37   11.80
  -7   3   3  287.67   11.80
  -7   3   3  289.87   11.90
   7  -4  -3   18.90    1.20
   7   4   3   17.80    1.20
  -7  -4  -3   16.10    1.30
  -7   4   3   15.60    1.30
  -7   4   3   16.40    1.30
  -7   4   3   16.30    1.40
   7  -5  -3  183.78    7.30
   7   5   3  176.18    7.20
  -7   5   3  175.98    7.50
  -7   5   3  174.78    7.50
   7   6   3  290.47   11.70
   7  -6  -3  301.57   11.80
  -7   6   3  300.47   12.00
  -7   6   3  295.87   12.00
   7  -7  -3   88.29    3.70
   7   7   3   87.69    3.70
  -7   7   3   86.09    3.90
  -7   7   3   87.09    3.90
   7  -8  -3   66.19    2.70
   7   8   3   62.59    2.70
  -7   8   3   65.29    2.90
  -7   8   3   60.59    2.80
  -8   6  -3   71.99    3.10
   8  -5   3   36.10    1.70
  -8   5  -3   34.10    1.80
   8  -4   3   73.19    3.20
   8  -3   3   65.99    3.00
  -8  -3   3   70.99    3.20
   8   2  -3  169.08    7.00
   8  -2   3  175.58    7.20
  -8  -2   3  185.48    7.50
  -8   2  -3  180.08    7.40
   8  -1   3   83.89    3.80
   8   1  -3   84.29    3.60
  -8   1  -3   88.99    4.00
  -8  -1   3   90.29    3.90
  -8  -1   3   86.19    4.00
   8   0   3  203.88    8.40
   8   0  -3  207.68    8.30
  -8   0   3  207.38    8.80
  -8   0   3  207.98    8.60
  -8   0  -3  217.78    8.70
   8   1   3   89.19    3.90
   8  -1  -3   89.29    3.80
  -8   1   3   90.99    4.00
  -8   1   3   89.19    4.20
  -8  -1  -3   92.79    4.20
   8   2   3  178.18    7.40
   8  -2  -3  181.38    7.30
  -8  -2  -3  181.28    7.60
  -8   2   3  182.98    7.70
  -8   2   3  186.18    7.60
   8  -3  -3   68.49    3.00
   8   3   3   69.69    3.10
  -8   3   3   70.29    3.20
  -8   3   3   69.19    3.30
  -8  -3  -3   68.79    3.30
   8   4   3   74.49    3.20
   8  -4  -3   76.19    3.10
  -8   4   3   68.69    3.30
  -8   4   3   73.19    3.30
  -8  -4  -3   72.59    3.30
   8   5   3   39.70    1.80
   8  -5  -3   38.30    1.80
  -8   5   3   37.50    1.90
   8   6   3   73.79    3.00
   8  -6  -3   71.39    3.00
  -8   6   3   71.39    3.10
  -8   6   3   68.19    3.10
   9  -2   3  170.18    6.60
  -9   2  -3  158.38    6.70
  -9  -2   3  165.88    6.70
   9  -1   3  105.69    4.40
  -9  -1   3  110.39    4.50
  -9   1  -3  102.79    4.50
   9   0   3  193.88    7.70
  -9   0   3  200.08    7.90
  -9   0  -3  186.88    7.80
   9   1   3  107.89    4.40
  -9   1   3  106.79    4.60
  -9  -1  -3  107.39    4.60
   9  -2  -3  155.78    6.50
   9   2   3  171.88    6.60
  -9  -2  -3  176.28    6.80
  -9   2   3  161.68    6.80
  -9   2   3  166.38    6.70
   0 -12   4  249.18   10.80
   0 -12   4  262.27   10.30
   0 -11   4    1.20    0.70
   0 -11   4    0.90    0.70
   0 -11   4    1.50    0.60
   0 -10   4   40.00    2.50
   0 -10   4   36.00    2.10
   0  -9   4   12.70    1.30
   0  -9   4   10.60    1.10
   0  -8   4  301.77   12.50
   0   7  -4 1153.18   46.00
   0   7  -4 1146.59   49.70
   0  -6   4  226.28   11.20
   0   6  -4  256.67   13.30
   0   6  -4  230.58   10.60
   0   5  -4 1052.89   43.80
   0   5  -4 1044.80   41.50
   0  -5   4 1047.20   42.20
   0  -4   4 2541.25  100.19
   0   4  -4 2625.24  101.49
   0   4  -4 2545.75   99.59
   0   3  -4 2106.99   79.89
   0  -3   4 2014.10   80.49
   0  -2   4 2412.26  100.29
   0  -2   4 2732.33  107.29
   0   2  -4 2672.23  100.79
   0   1  -4    1.50    0.60
   0  -1   4    1.00    1.80
   0   1   4    1.40    2.20
   0  -1  -4    3.80    1.00
   0   2   4 2794.62   99.89
   0  -2  -4 2643.04   99.99
   0   2   4 2313.27  100.19
   0   2   4 2560.14  108.69
   0   3   4 2004.00   88.49
   0  -3  -4 1964.90   77.89
   0   3   4 2115.79   77.89
   0   3   4 1906.31   78.49
   0   4   4 2868.11  115.79
   0   4   4 2220.58  101.49
   0   4   4 2592.54  100.19
   0  -4  -4 2617.84  100.99
   0   4   4 2660.93  100.79
   0   5   4 1048.00   43.20
   0  -5  -4 1057.69   42.10
   0   5   4 1031.90   41.70
   0  -6  -4  225.38   11.00
   0   6   4  220.78   10.60
   0   6   4  242.48   12.40
   0  -7  -4 1194.98   46.70
   0   7   4 1091.49   48.40
   0   8   4  291.47   16.30
   0  -8  -4  292.87   14.20
   0  -9  -4   10.80    1.20
   0   9   4    9.60    0.90
   0  10   4   38.10    1.90
   0 -10  -4   36.60    2.20
   0  11   4    1.10    0.40
   0 -11  -4    1.70    0.70
   0  12   4  275.37   10.90
   0 -12  -4  276.87   11.70
   1 -12   4   53.49    2.60
  -1 -12   4   54.29    3.10
  -1 -12   4   54.69    2.60
   1 -11   4   14.00    1.20
   1 -11   4   13.30    1.60
  -1 -11   4   12.80    1.10
  -1  11  -4   12.40    1.20
  -1 -11   4   13.10    1.60
  -1 -11   4   13.20    1.40
   1 -10   4  132.89    6.10
   1 -10   4  134.59    5.70
   1 -10   4  123.79    6.50
  -1  10  -4  119.79    5.30
  -1 -10   4  133.69    6.00
  -1  10  -4  129.89    5.80
  -1 -10   4  126.59    5.50
   1  -9   4   16.80    1.90
   1  -9   4   14.60    1.50
   1  -9   4   12.30    1.20
  -1   9  -4   16.20    1.50
  -1   9  -4   14.10    0.90
  -1  -9   4   14.90    1.50
   1  -8   4   12.00    1.30
   1   8  -4   13.10    2.40
   1  -8   4    9.60    2.80
  -1  -8   4   12.40    1.30
  -1   8  -4   14.10    3.90
   1  -7   4   27.30    3.10
   1   7  -4   24.50    2.50
  -1   7  -4   29.50    2.50
  -1  -7   4   28.20    1.70
  -1   7  -4   25.10    3.90
   1  -6   4  282.27   13.20
   1   6  -4  275.67   12.50
  -1   6  -4  294.27   14.70
  -1   6  -4  266.77   12.20
   1   5  -4   16.50    1.70
   1  -5   4   12.10    1.90
  -1   5  -4   13.10    2.30
   1   4  -4 1012.80   39.10
   1  -4   4  996.80   39.80
  -1   4  -4  949.60   40.20
  -1   4  -4  978.70   38.90
   1  -3   4 2586.64   98.29
   1   3  -4 2552.64   97.49
  -1   3  -4 2521.35   97.39
  -1   3  -4 2596.24   98.39
  -1  -3   4 2328.67   97.59
   1  -2   4 1244.58   47.30
   1  -2   4 1129.59   46.30
   1   2  -4 1207.88   46.50
  -1  -2   4 1160.68   55.79
  -1   2  -4 1215.08   46.50
   1   1  -4  476.95   19.60
   1  -1   4  468.15   20.90
   1  -1   4  504.45   19.60
  -1  -1   4  514.15   28.00
  -1   1  -4  498.45   19.60
   1   0   4  395.56   15.90
   1   0   4  435.06   19.40
   1   0   4  405.56   15.90
   1   0  -4  375.86   15.70
  -1   0   4  421.96   17.40
  -1   0  -4  373.96   15.70
  -1   0   4  356.76   22.90
   1   1   4  497.45   19.60
   1   1   4  491.15   24.50
   1   1   4  481.05   19.30
   1  -1  -4  448.86   19.50
  -1   1   4  493.15   28.20
  -1  -1  -4  498.65   26.50
  -1  -1  -4  485.85   19.10
  -1   1   4  471.15   20.80
   1   2   4 1102.49   53.69
   1   2   4 1147.89   46.40
   1   2   4 1242.78   46.80
   1  -2  -4 1195.98   46.80
  -1   2   4 1191.48   48.20
  -1   2   4 1290.87   57.59
  -1   2   4 1152.68   46.70
   1   3   4 2537.95   90.49
   1  -3  -4 2570.94   90.59
   1   3   4 2403.16   89.89
   1   3   4 2156.18   99.69
  -1  -3  -4 2282.57   90.39
  -1   3   4 2290.27   90.29
  -1   3   4 2167.38   91.59
  -1   3   4 2168.18  101.79
   1   4   4 1034.70   38.00
   1   4   4  982.20   37.20
   1   4   4  857.61   60.09
   1  -4  -4  969.90   38.00
  -1   4   4  879.41   39.20
  -1  -4  -4  956.10   37.90
  -1   4   4  930.11   37.70
   1   5   4   11.90    1.70
  -1  -5  -4   17.30    1.90
  -1   5   4   11.50    2.50
  -1   5   4   12.40    1.60
   1  -6  -4  259.27   12.20
   1   6   4  270.77   12.00
  -1  -6  -4  229.98   11.70
  -1   6   4  268.07   13.90
   1  -7  -4   27.60    3.10
   1   7   4   25.80    2.70
  -1   7   4   25.50    3.80
   1  -8  -4   13.40    2.70
  -1   8   4   10.90    3.30
   1   9   4   12.40    1.00
  -1   9   4   14.80    1.00
  -1   9   4   14.10    1.20
  -1  -9  -4   16.10    1.30
   1 -10  -4  103.49    5.60
   1  10   4  125.79    5.10
  -1 -10  -4  123.79    5.30
  -1  10   4  125.99    5.10
   1  11   4   12.90    1.00
  -1 -11  -4   13.90    1.20
  -1  11   4   13.00    1.00
   1  12   4   54.49    2.40
  -1  12   4   54.49    2.40
  -1 -12  -4   53.99    2.60
   2 -12   4   89.99    3.90
  -2 -12   4   87.89    3.80
  -2  12  -4   89.59    4.00
  -2 -12   4   89.39    4.30
   2 -11   4  183.88    7.70
   2 -11   4  179.68    8.20
  -2 -11   4  175.68    7.90
  -2  11  -4  191.98    7.80
  -2 -11   4  183.58    7.50
   2 -10   4  144.89    7.50
   2 -10   4  153.98    6.70
  -2 -10   4  161.28    6.60
  -2  10  -4  155.58    6.90
  -2 -10   4  163.28    7.00
   2  -9   4   66.39    3.40
   2  -9   4   75.39    3.80
   2  -9   4   67.39    4.10
  -2   9  -4   65.29    3.00
  -2   9  -4   67.09    3.50
  -2  -9   4   66.49    3.70
   2   8  -4  312.57   15.20
   2  -8   4  346.57   13.80
   2  -8   4  336.67   16.30
  -2  -8   4  327.47   13.60
   2   7  -4  134.59    7.60
   2  -7   4  149.88    6.50
   2  -7   4  143.69    8.50
  -2   7  -4  139.99   10.90
  -2  -7   4  147.19    6.30
  -2   7  -4  143.49    8.00
   2   6  -4  126.59    6.90
   2  -6   4  141.99    7.80
  -2   6  -4  137.69    6.70
  -2   6  -4  119.89   10.00
   2   5  -4  463.75   19.00
   2  -5   4  440.46   19.70
  -2   5  -4  433.66   18.50
   2   4  -4 1077.69   42.30
   2  -4   4 1080.49   43.10
  -2   4  -4 1028.20   42.00
   2  -3   4   92.49    5.40
   2   3  -4   88.09    4.70
  -2   3  -4   88.19    4.50
   2   2  -4  441.76   17.90
   2  -2   4  398.36   17.60
   2  -2   4  451.95   18.70
  -2   2  -4  446.16   17.80
  -2  -2   4  439.56   28.80
   2  -1   4  670.73   27.80
   2   1  -4  683.43   27.10
   2  -1   4  689.13   27.10
  -2  -1   4  680.83   38.30
  -2   1  -4  685.13   27.10
   2   0  -4 1650.23   65.09
   2   0  -4 1693.23   65.29
   2   0   4 1644.64   65.29
   2   0   4 1753.02   65.29
  -2   0   4 1710.03   77.89
  -2   0  -4 1620.74   65.19
  -2   0   4 1667.03   67.49
   2   1   4  676.43   26.80
   2  -1  -4  693.03   26.90
   2   1   4  639.84   26.90
  -2   1   4  701.53   29.10
  -2   1   4  647.54   37.90
   2   2   4  428.36   24.30
   2   2   4  427.06   17.80
   2   2   4  451.75   17.50
   2  -2  -4  400.16   17.60
  -2   2   4  412.56   19.70
  -2   2   4  425.66   28.60
   2   3   4   80.49    9.70
   2  -3  -4   75.29    4.60
   2   3   4   81.89    4.20
   2   3   4   90.59    4.70
  -2   3   4   81.69    4.50
  -2   3   4   80.89    6.10
   2   4   4  963.30   40.30
   2  -4  -4 1009.40   40.30
   2   4   4  977.80   39.60
  -2   4   4 1012.60   42.50
  -2   4   4 1040.20   40.10
   2   5   4  458.35   20.20
   2  -5  -4  479.65   20.30
  -2   5   4  470.25   22.30
   2   6   4  139.79    7.60
   2  -6  -4  131.19    7.50
  -2   6   4  133.69    9.30
   2   7   4  155.88    8.20
   2  -7  -4  131.19    8.10
  -2   7   4  140.29   10.00
   2  -8  -4  329.37   15.90
  -2   8   4  323.47   18.20
   2   9   4   66.49    3.00
  -2   9   4   62.19    3.10
  -2   9   4   66.19    3.00
  -2  -9  -4   66.49    3.20
   2  10   4  148.59    6.30
  -2  10   4  158.38    6.40
  -2 -10  -4  156.48    6.60
   2  11   4  190.28    7.80
  -2 -11  -4  198.78    8.00
  -2  11   4  191.98    7.80
   2  12   4   96.19    3.90
  -2  12   4   93.29    4.00
  -2 -12  -4   95.69    4.10
   3 -12   4   15.40    1.10
  -3 -12   4   14.30    1.20
  -3  12  -4   16.10    1.10
   3 -11   4    5.80    0.90
  -3 -11   4    5.80    0.90
  -3 -11   4    4.60    0.70
  -3  11  -4    5.70    0.80
   3 -10   4  231.98    9.40
   3 -10   4  224.18   10.00
  -3  10  -4  242.48    9.50
  -3 -10   4  198.48    9.50
   3  -9   4  234.08   11.00
   3  -9   4  231.58   10.10
  -3  -9   4  273.47   10.50
  -3   9  -4  232.48   10.20
   3  -8   4  513.15   20.80
   3  -8   4  552.44   21.90
   3  -8   4  525.45   21.20
  -3   8  -4  506.95   20.90
  -3  -8   4  508.75   20.90
   3  -7   4  335.47   16.50
   3  -7   4  327.97   14.10
  -3  -7   4  356.26   13.90
   3  -6   4  145.09    6.40
   3  -6   4  141.49    8.40
  -3   6  -4  142.19    7.10
  -3  -6   4  136.79    6.00
   3  -5   4  178.78    9.60
   3   5  -4  187.18    9.10
  -3   5  -4  172.38    8.40
   3   4  -4  211.88   10.00
   3  -4   4  213.88   10.70
  -3   4  -4  210.48    9.60
   3  -3   4  251.47   11.80
   3  -3   4  236.98   11.70
  -3   3  -4  246.78   10.80
   3   2  -4 1618.34   66.39
   3  -2   4 1691.33   66.69
   3  -2   4 1760.42   67.79
  -3   2  -4 1764.62   66.89
   3   1  -4 2730.93  103.49
   3  -1   4 2672.83  104.59
   3  -1   4 2618.84  103.79
  -3   1  -4 2547.84  103.79
  -3  -1   4 2806.42  107.29
   3   0   4  196.68    9.10
   3   0   4  206.08    9.10
   3   0   4  192.58    9.50
   3   0  -4  214.38    8.80
  -3   0   4  206.38   11.70
   3   1   4 2523.65  104.29
   3   1   4 2770.22  104.19
   3  -1  -4 2684.13  103.69
  -3   1   4 2744.53  107.39
   3   2   4 1730.83   65.29
   3  -2  -4 1698.53   65.49
   3   2   4 1644.14   65.69
  -3   2   4 1590.24   68.39
   3  -3  -4  250.57   11.70
   3   3   4  256.07   12.00
   3   3   4  266.77   11.40
  -3   3   4  265.77   14.40
   3   4   4  202.28    9.20
   3   4   4  194.08    9.90
   3  -4  -4  218.38    9.90
  -3   4   4  195.68    9.50
  -3   4   4  189.88   11.90
   3   5   4  172.58    9.20
   3  -5  -4  165.18    9.10
  -3   5   4  199.48   11.80
   3  -6  -4  132.69    7.90
   3   6   4  143.39    8.10
  -3   6   4  141.29   10.10
   3   7   4  322.17   16.00
   3  -7  -4  344.47   16.20
  -3   7   4  338.97   18.80
   3   8   4  506.45   19.80
  -3   8   4  502.05   20.00
  -3   8   4  503.15   20.00
   3   9   4  222.08    9.00
  -3   9   4  224.08    9.20
   3  10   4  229.78    9.30
  -3  10   4  231.58    9.40
  -3 -10  -4  238.58    9.50
   3  11   4    4.90    0.60
  -3  11   4    6.60    0.70
  -3 -11  -4    4.90    0.80
   3  12   4   16.40    0.90
   3 -12  -4   14.90    0.90
  -3 -12  -4   15.00    1.00
   4 -11   4  192.28    8.00
  -4  11  -4  196.28    8.00
   4 -10   4    4.90    0.90
  -4  10  -4    4.00    0.80
  -4 -10   4    4.70    1.00
   4  -9   4   84.19    3.90
  -4   9  -4   78.09    3.90
  -4  -9   4   76.29    4.00
   4  -8   4  146.49    7.30
   4  -8   4  151.78    6.60
  -4   8  -4  150.28    6.40
  -4   8  -4  146.39    6.60
  -4  -8   4  151.28    6.70
   4  -7   4   72.39    4.30
   4  -7   4   72.69    3.60
  -4   7  -4   69.99    3.40
  -4  -7   4   71.89    3.70
  -4   7  -4   70.69    3.60
   4  -6   4   85.29    4.40
   4  -6   4   75.69    5.90
  -4  -6   4   79.29    3.80
   4  -5   4  262.77   13.30
   4  -5   4  251.87   11.20
  -4  -5   4  286.57   10.90
  -4   5  -4  257.87   12.10
   4  -4   4  537.85   23.20
  -4   4  -4  510.75   21.90
   4  -3   4 1786.42   68.29
   4  -3   4 1701.93   68.49
  -4   3  -4 1652.13   67.39
   4   2  -4  120.99    5.30
   4  -2   4  103.69    6.20
   4  -2   4   95.79    5.40
  -4  -2   4   92.39    8.20
  -4   2  -4   98.99    5.50
   4   1  -4 1838.02   70.39
   4  -1   4 1790.82   70.69
  -4  -1   4 1830.92   75.19
  -4   1  -4 1742.43   70.69
   4   0   4 1336.17   52.59
   4   0  -4 1393.36   52.19
  -4   0   4 1247.58   56.39
   4  -1  -4 1821.12   69.19
   4   1   4 1777.92   69.89
   4   1   4 1782.12   69.59
  -4   1   4 1688.93   73.49
   4   2   4   98.09    5.80
   4   2   4  100.79    5.50
  -4   2   4   96.69    8.10
   4   3   4 1652.93   66.09
   4   3   4 1603.74   65.19
  -4   3   4 1704.73   69.79
   4   4   4  524.35   23.00
   4  -4  -4  513.65   22.50
   4   4   4  521.45   22.00
  -4   4   4  535.75   26.10
   4  -5  -4  258.57   12.60
   4   5   4  270.67   13.00
  -4   5   4  243.48   15.20
   4  -6  -4   87.59    6.00
   4   6   4   92.49    6.30
  -4   6   4   78.69    7.80
   4   7   4   71.69    3.10
  -4   7   4   68.19    3.40
  -4   7   4   67.59    3.40
   4   8   4  147.29    6.20
  -4   8   4  158.68    6.60
  -4   8   4  148.29    6.50
   4   9   4   78.49    3.50
  -4   9   4   78.09    3.70
  -4   9   4   81.69    3.70
   4  10   4    4.70    0.60
   4 -10  -4    3.70    0.60
  -4  10   4    6.20    0.80
  -4 -10  -4    5.20    0.80
   4 -11  -4  195.08    8.00
   4  11   4  203.98    7.90
  -4 -11  -4  201.78    8.10
   5 -10   4  397.26   15.30
  -5  10  -4  370.56   15.20
   5  -9   4   13.70    1.30
  -5   9  -4   13.70    1.20
  -5   9  -4   13.50    1.10
   5  -8   4  537.25   21.20
  -5   8  -4  545.55   21.20
  -5  -8   4  528.45   21.40
  -5   8  -4  518.05   21.00
   5  -7   4  179.78    8.00
  -5   7  -4  181.78    8.00
  -5  -7   4  195.48    8.20
  -5   7  -4  185.68    7.80
   5  -6   4  286.97   12.10
  -5  -6   4  299.17   12.20
  -5   6  -4  291.37   11.90
   5  -5   4  358.76   14.20
   5  -5   4  353.06   17.10
  -5   5  -4  347.87   14.10
  -5  -5   4  360.36   14.20
  -5   5  -4  319.57   15.50
   5  -4   4   55.79    4.80
  -5  -4   4   57.29    3.00
  -5  -4   4   60.39    7.60
  -5   4  -4   56.89    4.00
  -5  -3   4  221.18   15.20
  -5   3  -4  218.38   10.50
  -5  -3   4  218.48    9.20
   5   2  -4  259.87   11.70
   5  -2   4  256.37   12.10
  -5   2  -4  270.87   12.30
  -5  -2   4  266.47   10.90
   5  -1   4  587.74   23.80
   5   1  -4  544.95   23.20
  -5  -1   4  569.54   22.40
  -5  -1   4  575.54   28.80
  -5   1  -4  540.85   23.70
   5   0   4   78.59    5.00
   5   0  -4   77.79    4.60
  -5   0  -4   77.39    4.90
  -5   0   4  100.79    8.70
  -5   0   4   79.59    3.90
   5  -1  -4  545.25   23.60
   5   1   4  542.85   24.10
   5   1   4  593.44   27.90
  -5   1   4  596.04   22.90
  -5   1   4  589.64   29.00
   5   2   4  271.27   12.50
   5   2   4  264.67   13.00
  -5   2   4  270.47   11.20
  -5   2   4  267.37   16.50
   5   3   4  213.68   11.40
   5   3   4  209.88   10.50
  -5   3   4  221.48    9.40
  -5   3   4  229.78   14.60
   5   4   4   60.69    4.10
   5   4   4   56.39    4.80
  -5   4   4   50.09    6.40
   5  -5  -4  373.46   14.40
   5   5   4  350.46   14.40
  -5   5   4  367.66   14.60
  -5   5   4  368.06   14.70
  -5   5   4  355.96   15.90
   5   6   4  288.77   11.90
   5  -6  -4  311.47   12.00
  -5   6   4  297.57   12.20
  -5   6   4  295.07   12.20
   5  -7  -4  182.68    7.60
   5   7   4  188.78    7.60
  -5   7   4  188.58    7.90
  -5   7   4  179.58    7.80
   5  -8  -4  557.34   21.60
   5   8   4  534.95   21.50
  -5   8   4  563.34   21.80
  -5   8   4  546.15   21.80
   5  -9  -4   14.20    1.00
   5   9   4   14.10    0.90
  -5   9   4   12.70    1.20
  -5   9   4   12.90    1.10
   5  10   4  417.66   16.00
   5 -10  -4  402.36   16.00
  -5 -10  -4  399.26   16.10
  -5  10   4  417.76   16.10
   6  -9   4   55.59    2.60
  -6   9  -4   53.59    2.50
   6  -8   4  226.28    9.00
  -6  -8   4  193.88    9.10
  -6   8  -4  228.28    8.90
   6  -7   4   82.59    3.90
  -6  -7   4   76.59    4.10
  -6   7  -4   87.79    3.80
   6  -6   4  114.79    5.30
  -6  -6   4  116.09    5.40
  -6   6  -4  115.49    5.10
   6  -5   4  319.47   13.60
  -6  -5   4  356.26   13.80
  -6   5  -4  324.27   13.50
   6  -4   4  291.07   12.50
  -6  -4   4  324.37   12.70
  -6   4  -4  303.17   12.50
   6  -3   4  102.69    4.90
  -6  -3   4  108.89    5.50
  -6   3  -4  101.69    4.70
  -6  -3   4  111.09    5.00
  -6  -3   4  105.89    4.60
   6  -2   4  949.01   42.70
   6  -2   4 1063.59   40.70
  -6   2  -4 1037.30   41.00
  -6   2  -4 1018.10   40.60
  -6  -2   4 1047.40   41.40
  -6  -2   4 1077.39   40.50
  -6  -2   4 1087.49   40.90
   6  -1   4  322.37   15.00
   6   1  -4  320.57   14.60
  -6   1  -4  318.67   15.00
  -6  -1   4  348.67   13.70
  -6  -1   4  329.57   20.20
   6   0  -4  562.54   24.20
   6   0   4  589.44   24.90
  -6   0   4  604.54   30.50
  -6   0  -4  556.84   24.70
  -6   0   4  589.54   23.30
   6   1   4  337.57   15.70
  -6  -1  -4  338.77   14.80
  -6   1   4  339.57   14.20
  -6   1   4  355.66   15.90
  -6   1   4  349.96   20.70
   6  -2  -4 1107.29   41.20
   6   2   4  931.41   41.70
   6   2   4 1092.59   41.30
  -6  -2  -4 1085.09   41.50
  -6   2   4 1042.20   41.80
  -6   2   4 1103.29   41.50
  -6   2   4 1085.99   42.40
   6   3   4  103.59    4.60
   6  -3  -4  114.39    4.60
  -6   3   4  109.79    5.60
  -6  -3  -4  105.49    4.90
  -6   3   4  111.09    4.90
   6   4   4  314.27   12.50
   6  -4  -4  323.07   12.50
  -6   4   4  311.97   12.80
  -6   4   4  303.87   13.40
  -6  -4  -4  312.87   12.70
  -6   4   4  318.97   12.80
   6  -5  -4  334.57   13.20
   6   5   4  335.27   13.20
  -6   5   4  331.37   13.50
  -6   5   4  325.27   13.50
   6  -6  -4  120.89    5.10
   6   6   4  114.09    5.00
  -6   6   4  121.59    5.40
  -6   6   4  122.29    5.40
   6   7   4   83.79    3.70
   6  -7  -4   89.09    3.80
  -6   7   4   85.19    4.00
  -6   7   4   88.79    4.00
   6  -8  -4  243.28    9.50
   6   8   4  234.78    9.40
  -6   8   4  244.78    9.70
  -6   8   4  223.98    9.60
   6   9   4   64.39    2.60
   6  -9  -4   60.59    2.70
  -6   9   4   56.19    2.70
  -6   9   4   60.19    2.80
   7  -8   4  142.09    6.20
  -7   8  -4  160.68    6.20
   7  -7   4  202.38    8.60
  -7   7  -4  217.68    8.60
   7  -6   4   69.59    3.30
  -7   6  -4   71.59    3.30
  -7  -6   4   67.09    3.50
   7  -5   4   91.79    4.00
  -7   5  -4   89.89    3.90
  -7  -5   4   72.09    4.00
   7  -4   4  244.48   10.30
  -7   4  -4  253.77   10.20
   7  -3   4  523.55   21.50
  -7   3  -4  525.55   21.30
  -7  -3   4  555.04   21.50
  -7  -3   4  558.84   21.70
   7  -2   4   79.39    3.80
  -7  -2   4   79.39    3.90
  -7   2  -4   80.69    3.80
  -7  -2   4   76.09    3.90
  -7  -2   4   84.59    3.70
   7   1  -4  154.98    6.20
   7  -1   4  152.78    6.40
   7  -1   4  142.19    6.60
  -7  -1   4  156.98    7.40
  -7  -1   4  158.78    6.80
  -7  -1   4  166.28    6.60
  -7   1  -4  157.58    6.70
  -7  -1   4  144.49    6.80
   7   0  -4    9.30    0.80
   7   0   4   11.20    0.90
   7   0   4    9.70    1.10
  -7   0   4    9.80    1.20
  -7   0  -4   10.00    1.10
  -7   0   4    8.70    1.10
  -7   0   4   10.40    1.50
  -7   0   4   10.50    1.00
   7  -1  -4  156.68    6.40
   7   1   4  160.58    6.60
  -7   1   4  164.58    6.80
  -7   1   4  157.38    7.50
  -7  -1  -4  154.38    6.80
  -7   1   4  157.48    7.00
   7  -2  -4   86.49    3.60
   7   2   4   85.89    3.70
  -7   2   4   79.59    4.40
  -7   2   4   83.79    3.90
  -7  -2  -4   84.79    4.00
  -7   2   4   83.09    4.10
   7   3   4  570.14   22.30
   7  -3  -4  578.74   22.20
  -7  -3  -4  564.64   22.60
  -7   3   4  569.04   22.60
  -7   3   4  567.54   22.70
   7   4   4  255.17   10.50
   7  -4  -4  267.17   10.40
  -7   4   4  246.08   10.70
  -7   4   4  262.07   10.70
  -7  -4  -4  274.07   10.70
   7   5   4   94.99    4.10
   7  -5  -4   96.19    4.10
  -7   5   4   96.69    4.30
  -7   5   4   94.49    4.30
   7   6   4   75.49    3.30
   7  -6  -4   79.19    3.30
  -7   6   4   75.59    3.50
  -7   6   4   76.19    3.50
   7  -7  -4  226.38    8.90
   7   7   4  228.18    8.90
  -7   7   4  220.58    9.10
  -7   7   4  223.58    9.10
   7   8   4  171.78    6.60
   7  -8  -4  166.08    6.60
  -7   8   4  155.08    6.70
  -7   8   4  171.08    6.80
  -8   5  -4   38.70    1.90
  -8   4  -4   39.10    2.20
   8  -3   4    1.90    0.40
  -8  -3   4    1.70    0.50
   8  -2   4  105.89    4.50
  -8   2  -4  107.19    4.70
  -8  -2   4  109.39    4.80
   8  -1   4   34.90    1.80
  -8  -1   4   33.70    2.00
  -8  -1   4   35.80    1.80
  -8   1  -4   33.10    1.90
   8   0  -4  565.84   22.50
   8   0   4  570.34   22.60
  -8   0   4  578.64   22.90
  -8   0   4  577.84   22.70
  -8   0  -4  597.84   22.80
   8  -1  -4   32.90    1.60
   8   1   4   34.10    1.70
  -8   1   4   35.20    2.00
  -8  -1  -4   36.00    2.00
  -8   1   4   32.50    1.90
   8  -2  -4  111.59    4.60
   8   2   4  110.59    4.70
  -8  -2  -4  112.69    4.90
  -8   2   4  112.39    5.00
  -8   2   4  113.59    4.90
   8   3   4    1.50    0.40
   8  -3  -4    1.80    0.40
  -8  -3  -4    3.70    0.70
  -8   3   4    2.00    0.50
  -8   3   4    1.60    0.50
   8   4   4   39.20    1.90
   8  -4  -4   41.50    1.80
  -8   4   4   43.20    2.10
  -8  -4  -4   38.90    2.00
  -8   4   4   39.50    2.10
   8   5   4   41.80    1.90
   8  -5  -4   42.30    1.80
  -8   5   4   39.40    2.00
   9   0   4   44.80    2.00
  -9   0  -4   43.90    2.10
  -9   0   4   45.70    2.20
   0 -12   5    2.00    0.50
   0 -12   5    1.40    0.50
   0 -11   5   50.29    3.20
   0 -11   5   45.40    2.40
   0 -11   5   45.10    2.70
   0 -10   5    4.40    1.00
   0  -9   5   73.29    3.80
   0  -8   5   33.40    2.10
   0   8  -5   27.50    2.80
   0   7  -5  176.68    9.10
   0  -7   5  191.78    7.90
   0   6  -5  505.05   21.20
   0   5  -5 1679.93   64.69
   0  -5   5 1614.64   65.39
   0  -4   5  907.31   37.00
   0   4  -5  917.21   36.30
   0  -3   5  787.52   33.30
   0   3  -5  859.61   32.70
   0  -2   5   45.40    6.30
   0  -2   5   43.20    2.30
   0  -1   5  513.85   26.40
   0  -1   5  443.86   19.50
   0   1  -5  499.55   19.40
   0   0   5    2.00    0.70
   0   0  -5   -0.10    0.40
   0   0   5   -0.40    1.30
   0   1   5  515.75   28.30
   0   1   5  499.35   20.60
   0   2   5   48.70    3.00
   0   2   5   47.50    7.40
   0  -2  -5   54.09    3.30
   0   3   5  826.22   32.90
   0  -3  -5  838.82   33.10
   0   3   5  834.32   32.40
   0   3   5  781.42   43.60
   0  -4  -5  994.00   38.10
   0   4   5  913.21   37.10
   0   4   5  917.91   37.80
   0  -5  -5 1768.52   68.09
   0   5   5 1663.33   67.69
   0   6   5  566.54   24.00
   0  -6  -5  572.64   24.40
   0  -7  -5  158.88    8.70
   0  -8  -5   27.90    3.40
   0   9   5   67.99    3.20
   0   9   5   68.09    3.10
   0  10   5    4.00    0.60
   0  11   5   45.10    2.10
   0  12   5    1.40    0.40
   1 -12   5   65.39    3.00
   1 -12   5   63.59    3.40
  -1 -12   5   66.19    3.50
   1 -11   5    7.50    1.10
   1 -11   5    7.20    1.30
   1 -11   5    7.90    0.90
  -1 -11   5    7.70    1.40
  -1  11  -5    7.50    1.00
  -1 -11   5    7.80    1.10
   1 -10   5  148.99    6.50
   1 -10   5  157.88    7.00
   1 -10   5  152.88    7.50
  -1 -10   5  155.58    6.90
  -1  10  -5  154.28    6.80
   1  -9   5  105.19    5.10
   1  -9   5  128.09    5.70
   1  -9   5  112.29    6.00
  -1  -9   5  122.69    5.60
  -1   9  -5  116.99    5.40
   1  -8   5  123.79    5.60
   1   8  -5  108.79    6.70
  -1  -8   5  123.49    5.50
  -1   8  -5  113.89    7.50
   1   7  -5  132.39    7.20
   1  -7   5  134.19    6.00
   1  -7   5  131.69    7.90
  -1   7  -5  140.99    7.20
  -1   7  -5  142.89    9.70
  -1  -7   5  133.59    5.90
   1  -6   5  481.95   20.40
   1   6  -5  466.85   19.50
  -1   6  -5  463.55   19.30
  -1   6  -5  413.36   21.40
   1   5  -5  202.48    9.30
   1  -5   5  197.28   10.00
  -1   5  -5  205.28   10.90
  -1   5  -5  189.98    9.00
   1   4  -5 2354.56   89.09
   1  -4   5 2172.38   89.79
  -1   4  -5 2324.77   88.89
   1   3  -5 1043.10   39.20
   1  -3   5 1024.60   40.10
  -1  -3   5  930.51   49.90
  -1   3  -5 1043.90   39.10
  -1  -3   5  903.91   39.40
   1   2  -5 1448.16   57.19
   1  -2   5 1496.25   58.09
   1  -2   5 1298.87   56.89
  -1   2  -5 1545.45   57.19
  -1  -2   5 1544.35   68.89
   1  -1   5  198.08    9.00
   1   1  -5  223.98    9.10
   1  -1   5  211.98    9.10
  -1  -1   5  228.78   17.40
  -1   1  -5  213.68    9.10
   1   0  -5   18.00    1.30
   1   0   5   23.60    3.70
   1   0   5   20.40    1.60
   1   0   5   20.00    1.50
  -1   0   5   18.40    2.40
  -1   0   5   22.20    5.50
  -1   0  -5   22.60    1.50
   1   1   5  219.08    9.80
   1  -1  -5  226.28   10.00
   1   1   5  220.68    9.60
   1   1   5  222.28   14.80
  -1   1   5  254.27   18.80
  -1  -1  -5  200.28    9.30
  -1   1   5  244.78   11.40
   1  -2  -5 1510.25   55.89
   1   2   5 1413.66   55.79
   1   2   5 1317.77   63.89
   1   2   5 1479.25   55.39
  -1   2   5 1381.46   57.19
  -1   2   5 1451.75   55.89
  -1   2   5 1376.86   67.29
   1   3   5  983.50   38.80
   1   3   5  888.91   48.70
   1   3   5 1003.30   39.30
   1  -3  -5  983.60   39.40
  -1   3   5 1016.90   39.40
  -1   3   5 1024.70   40.90
   1   4   5 2141.89   91.19
   1   4   5 2440.06   92.09
   1  -4  -5 2312.17   92.19
  -1  -4  -5 2356.76   92.09
  -1   4   5 2550.14   93.89
  -1   4   5 2315.97   91.89
   1  -5  -5  210.08   10.10
   1   5   5  213.68   10.00
  -1  -5  -5  201.78    9.90
  -1   5   5  200.08    9.70
  -1   5   5  194.98   11.30
   1  -6  -5  485.75   21.30
   1   6   5  504.65   21.10
  -1   6   5  471.75   22.80
  -1  -6  -5  447.06   21.00
  -1   6   5  516.85   20.90
   1   7   5  144.59    7.80
   1  -7  -5  130.59    7.90
  -1   7   5  132.69    9.30
   1  -8  -5  107.69    7.10
  -1   8   5  106.79    8.50
   1   9   5  104.59    4.70
   1   9   5  111.49    4.60
  -1   9   5  108.39    4.80
   1  10   5  154.48    6.10
  -1  10   5  146.69    6.10
  -1  10   5  138.79    6.20
   1  11   5    8.30    0.70
  -1  11   5    6.00    0.70
   1  12   5   68.79    2.80
  -1  12   5   62.69    2.80
   2 -12   5    4.70    0.60
  -2 -12   5    5.40    0.90
  -2  12  -5    5.30    0.70
   2 -11   5   97.39    4.40
   2 -11   5   95.69    5.00
  -2  11  -5  103.09    4.50
  -2 -11   5   96.79    4.60
   2 -10   5  449.26   18.80
   2 -10   5  433.96   18.10
   2 -10   5  454.85   17.80
  -2  10  -5  450.95   17.90
  -2 -10   5  437.66   18.10
   2  -9   5  299.37   12.40
   2  -9   5  270.97   11.20
   2  -9   5  289.17   11.70
  -2   9  -5  273.67   11.40
  -2  -9   5  232.38   11.50
   2  -8   5  118.79    5.70
   2  -8   5  132.29    6.10
   2  -8   5  129.89    6.60
  -2  -8   5  143.99    6.00
  -2   8  -5  125.99    5.90
   2  -7   5  116.59    7.60
   2  -7   5  122.89    5.60
   2   7  -5  119.79    6.90
  -2  -7   5  122.89    5.30
  -2   7  -5  121.09    6.50
   2   6  -5  131.99    7.20
   2  -6   5  133.69    5.90
   2  -6   5  133.19    8.00
  -2   6  -5  136.69    6.90
   2  -5   5  645.04   28.10
   2   5  -5  663.63   27.20
  -2   5  -5  660.43   26.80
   2  -4   5  987.60   39.70
   2   4  -5  958.10   38.60
  -2   4  -5  940.81   38.30
   2  -3   5  647.64   27.40
   2   3  -5  644.54   26.40
  -2   3  -5  659.13   26.30
   2  -2   5  363.86   15.90
   2  -2   5  351.86   14.70
  -2  -2   5  354.26   26.30
  -2   2  -5  354.76   14.80
   2   1  -5 1614.84   65.89
   2  -1   5 1717.53   65.99
  -2   1  -5 1801.12   66.09
  -2  -1   5 1641.34   80.49
   2   0   5 2218.58   82.79
   2   0  -5 2070.89   82.49
   2   0   5 2080.59   82.79
  -2   0  -5 2062.29   82.59
  -2   0   5 2272.27   85.59
  -2   0   5 2078.09   97.09
   2   1   5 1723.53   64.99
   2  -1  -5 1709.33   65.19
   2   1   5 1618.54   65.09
  -2   1   5 1547.25   78.69
  -2   1   5 1573.94   67.29
  -2  -1  -5 1805.22   64.79
   2  -2  -5  321.97   14.40
   2   2   5  326.77   14.50
   2   2   5  380.66   14.30
  -2   2   5  318.47   16.40
   2  -3  -5  652.93   26.10
   2   3   5  646.74   25.60
   2   3   5  640.84   26.10
   2   3   5  569.54   35.80
  -2   3   5  636.24   26.00
  -2   3   5  647.64   28.40
   2  -4  -5  943.91   38.20
   2   4   5  981.50   38.20
   2   4   5  938.11   37.40
  -2   4   5  954.80   38.00
  -2   4   5  879.61   40.10
   2  -5  -5  687.03   27.60
   2   5   5  673.43   27.60
  -2   5   5  607.04   29.40
  -2   5   5  642.44   27.00
   2   6   5  151.78    8.20
   2  -6  -5  134.19    8.00
  -2   6   5  150.38   10.00
   2  -7  -5  117.29    7.40
   2   7   5  116.39    7.20
  -2   7   5  121.49    9.10
   2   8   5  118.19    5.10
   2   8   5  123.19    5.00
  -2   8   5  124.39    5.20
  -2  -8  -5  110.89    5.20
   2   9   5  264.37   10.60
  -2  -9  -5  266.07   10.80
  -2   9   5  266.57   10.90
   2  10   5  430.96   16.60
  -2 -10  -5  414.16   16.80
  -2  10   5  423.56   16.80
   2  11   5   97.39    4.10
  -2  11   5   98.49    4.20
   2  12   5    4.70    0.50
  -2  12   5    5.90    0.60
   3 -11   5  338.07   13.60
  -3  11  -5  368.16   13.70
  -3 -11   5  316.77   13.80
   3 -10   5   25.00    2.20
   3 -10   5   23.40    1.70
  -3  10  -5   27.20    1.80
  -3 -10   5   27.30    2.00
   3  -9   5  258.87   11.50
   3  -9   5  262.67   11.10
   3  -9   5  271.27   12.10
  -3   9  -5  269.57   11.30
  -3  -9   5  292.77   11.50
   3  -8   5   48.70    3.00
   3  -8   5   52.69    3.60
   3  -8   5   47.50    2.70
  -3   8  -5   46.90    2.80
  -3  -8   5   58.69    3.00
   3  -7   5   18.10    1.60
   3  -7   5   18.80    3.10
  -3  -7   5   17.90    1.40
   3  -6   5  202.78   10.80
   3  -6   5  195.48    8.40
   3   6  -5  183.98    9.80
  -3   6  -5  189.58    9.30
   3  -5   5  208.08    9.10
   3  -5   5  218.18   11.30
   3   5  -5  220.08   10.60
  -3   5  -5  210.28    9.90
   3   4  -5  241.18   11.20
   3  -4   5  241.98   12.00
  -3   4  -5  225.78   10.70
   3  -3   5  765.92   31.60
   3   3  -5  752.42   30.70
  -3   3  -5  730.83   30.30
   3  -2   5  379.76   15.60
   3  -2   5  358.66   16.60
  -3   2  -5  367.96   15.60
   3  -1   5  454.45   18.80
   3  -1   5  452.45   19.70
  -3  -1   5  430.96   21.90
  -3   1  -5  468.75   18.80
   3   0   5  495.25   21.50
   3   0   5  512.95   20.90
   3   0   5  490.15   20.80
  -3   0   5  506.15   24.10
  -3   0  -5  520.95   20.80
   3   1   5  472.65   18.80
   3   1   5  440.36   18.90
  -3   1   5  431.56   21.70
   3   2   5  362.46   15.90
   3  -2  -5  363.76   15.60
   3   2   5  355.86   15.40
  -3   2   5  365.66   18.60
   3   3   5  723.53   30.30
   3  -3  -5  722.13   30.00
   3   3   5  741.33   29.60
  -3   3   5  724.93   33.10
   3   4   5  217.98   10.90
   3  -4  -5  237.68   10.90
   3   4   5  222.78   10.20
  -3   4   5  221.18   10.60
  -3   4   5  210.28   13.00
   3   5   5  217.68   10.90
   3  -5  -5  198.68   10.50
  -3   5   5  213.78   13.00
   3  -6  -5  185.38   10.10
   3   6   5  199.08   10.40
  -3   6   5  187.88   12.40
   3  -7  -5   16.00    2.80
   3   7   5   17.80    2.80
  -3   7   5   14.40    3.90
   3   8   5   45.90    2.20
  -3   8   5   45.60    2.40
  -3   8   5   45.50    2.50
   3   9   5  269.27   10.60
  -3   9   5  271.47   10.90
  -3  -9  -5  255.97   10.70
  -3   9   5  266.47   10.90
   3  10   5   24.90    1.40
  -3 -10  -5   23.50    1.60
  -3  10   5   26.10    1.60
   3  11   5  345.47   13.20
  -3  11   5  326.67   13.20
   4 -11   5   15.00    1.10
  -4  11  -5   15.50    1.10
   4 -10   5   15.70    1.30
  -4  10  -5   16.60    1.30
  -4 -10   5   13.80    1.40
   4  -9   5  136.59    6.00
   4  -9   5  136.19    6.60
  -4  -9   5  143.39    6.30
  -4   9  -5  133.69    6.10
   4  -8   5  262.57   11.60
   4  -8   5  255.67   10.70
  -4   8  -5  255.27   10.80
  -4   8  -5  246.28   10.50
  -4  -8   5  271.67   11.00
   4  -7   5  401.16   17.30
   4  -7   5  402.66   16.20
   4  -7   5  379.76   16.60
  -4   7  -5  397.66   16.10
  -4   7  -5  397.56   16.30
  -4  -7   5  433.86   16.40
   4  -6   5  566.44   22.70
   4  -6   5  542.85   21.90
   4  -6   5  586.94   24.80
  -4  -6   5  536.55   21.40
  -4   6  -5  486.75   22.00
  -4   6  -5  519.25   22.80
   4  -5   5  162.48    7.30
   4  -5   5  167.38    9.50
  -4   5  -5  155.88    8.10
  -4  -5   5  160.68    6.90
   4  -4   5  205.88    9.10
   4  -4   5  220.78   11.40
  -4   4  -5  213.98   10.10
   4  -3   5 1087.69   45.20
  -4   3  -5 1105.69   44.00
   4  -2   5  878.41   34.90
   4  -2   5  845.72   36.00
  -4   2  -5  856.51   35.00
  -4  -2   5  870.31   39.80
   4  -1   5 1578.74   62.29
   4  -1   5 1536.75   63.09
  -4   1  -5 1609.34   62.19
  -4  -1   5 1574.94   66.99
   4   0   5   95.89    5.40
  -4   0  -5  100.19    5.40
  -4   0   5   90.69    8.10
   4   1   5 1605.44   63.19
   4   1   5 1526.75   63.39
  -4   1   5 1660.13   67.89
   4   2   5  837.82   35.00
   4   2   5  843.42   35.50
  -4   2   5  899.21   39.60
   4   3   5 1087.59   43.50
   4   3   5 1078.89   44.30
  -4   3   5 1070.39   47.80
   4   4   5  204.78   10.40
   4   4   5  211.18   11.30
  -4   4   5  252.27   14.60
  -4   4   5  223.88    9.40
   4   5   5  156.78    9.00
   4  -5  -5  170.08    8.80
  -4   5   5  140.49    6.80
  -4   5   5  148.49   11.10
   4   6   5  553.44   25.60
   4  -6  -5  507.35   25.00
  -4   6   5  615.14   22.90
  -4   6   5  659.13   23.90
  -4   6   5  536.95   28.30
   4   7   5  398.86   16.10
  -4   7   5  424.66   16.40
  -4   7   5  403.16   16.40
   4   8   5  260.37   10.60
  -4   8   5  275.47   10.90
  -4   8   5  256.87   10.80
   4   9   5  134.69    5.80
  -4   9   5  144.29    6.10
  -4   9   5  146.69    6.10
   4  10   5   16.00    1.00
   4 -10  -5   14.80    1.10
  -4 -10  -5   17.80    1.20
  -4  10   5   15.60    1.20
  -4  10   5   15.90    1.10
   4 -11  -5   14.70    0.90
   4  11   5   16.20    0.90
   5 -10   5    8.80    0.90
  -5  10  -5    5.30    0.70
   5  -9   5  253.77    9.60
  -5  -9   5  218.38    9.80
  -5   9  -5  238.38    9.60
  -5   9  -5  222.88    9.40
   5  -8   5   82.89    4.00
  -5   8  -5   77.79    3.80
  -5  -8   5   85.49    4.10
  -5   8  -5   83.49    3.90
   5  -7   5  154.58    7.00
  -5  -7   5  165.38    7.20
  -5   7  -5  165.48    6.90
  -5   7  -5  161.68    7.00
   5  -6   5  292.97   12.30
   5  -6   5  301.87   13.10
  -5  -6   5  302.87   12.40
  -5   6  -5  298.17   12.20
   5  -5   5  577.54   23.00
   5  -5   5  564.34   23.90
  -5   5  -5  564.54   22.90
  -5  -5   5  612.44   23.10
   5  -4   5  361.46   17.50
  -5  -4   5  386.46   14.90
  -5   4  -5  354.46   16.30
  -5  -4   5  357.76   22.10
  -5   3  -5  502.55   22.50
  -5  -3   5  542.05   21.10
  -5  -3   5  539.45   28.50
   5  -2   5  220.28   10.20
  -5   2  -5  208.78   10.20
  -5  -2   5  208.88    8.80
  -5  -2   5  198.98   14.50
   5  -1   5  213.48   10.40
  -5   1  -5  220.38   10.40
  -5  -1   5  212.78    9.00
  -5  -1   5  211.38   14.70
   5   0   5  139.19    7.40
  -5   0  -5  142.69    7.40
  -5   0   5  135.99    6.10
  -5   0   5  130.59   10.90
   5   1   5  206.78   10.30
  -5   1   5  204.98    8.90
  -5  -1  -5  214.58   10.10
  -5   1   5  205.78   14.20
   5   2   5  194.88   10.30
   5   2   5  205.38   11.00
  -5   2   5  232.68   15.00
  -5   2   5  218.48    9.10
   5   3   5  531.35   22.70
   5   3   5  526.65   23.60
  -5   3   5  538.15   21.30
  -5   3   5  510.15   27.10
   5   4   5  377.56   16.40
   5   4   5  361.76   17.50
  -5   4   5  363.26   15.00
  -5   4   5  344.17   20.40
   5   5   5  572.94   22.40
   5   5   5  541.05   22.50
   5  -5  -5  586.54   22.40
  -5   5   5  568.94   22.70
  -5   5   5  579.84   22.70
  -5   5   5  585.54   23.50
   5  -6  -5  317.07   12.10
   5   6   5  296.17   12.10
  -5   6   5  301.77   12.40
  -5   6   5  296.97   12.40
   5   7   5  167.08    7.00
   5  -7  -5  176.58    7.00
  -5   7   5  167.88    7.30
  -5   7   5  167.58    7.30
   5  -8  -5   92.49    3.90
   5   8   5   85.79    3.80
  -5   8   5   86.79    4.10
  -5   8   5   87.19    4.10
   5  -9  -5  264.07   10.40
   5   9   5  253.57   10.30
  -5   9   5  265.57   10.50
  -5   9   5  255.47   10.50
   5 -10  -5    5.10    0.60
   5  10   5    5.30    0.50
  -5  10   5    5.70    0.70
  -5  10   5    5.30    0.70
   6  -9   5   53.29    2.50
  -6   9  -5   52.79    2.40
   6  -8   5  164.98    6.90
  -6  -8   5  150.48    7.10
  -6   8  -5  178.48    6.90
   6  -7   5  387.16   14.70
  -6  -7   5  318.57   14.70
  -6   7  -5  382.46   14.50
   6  -6   5  148.99    6.30
  -6  -6   5  138.19    6.40
  -6   6  -5  143.09    6.20
   6  -5   5  157.28    6.90
  -6   5  -5  159.88    6.80
  -6  -5   5  157.78    7.00
   6  -4   5  118.09    5.60
  -6  -4   5  130.39    6.30
  -6   4  -5  124.69    5.60
  -6  -4   5  133.79    5.80
   6  -3   5  192.58    8.00
  -6  -3   5  193.98    8.10
  -6   3  -5  179.78    7.80
  -6  -3   5  177.98    8.50
   6  -2   5  736.03   28.20
  -6  -2   5  707.73   28.90
  -6  -2   5  716.23   28.40
  -6   2  -5  718.03   28.10
  -6   2  -5  696.83   28.00
   6  -1   5   94.99    4.40
  -6   1  -5   92.59    4.30
  -6  -1   5   97.39    4.60
  -6  -1   5   91.39    5.00
   6   0   5  217.78    9.00
  -6   0   5  211.58    8.90
  -6   0   5  210.68    9.80
  -6   0   5  218.18    9.30
  -6   0  -5  220.38    9.00
   6   1   5   89.99    4.40
   6  -1  -5   98.49    4.00
  -6   1   5   94.99    5.20
  -6   1   5  100.29    4.40
  -6   1   5   99.79    4.80
  -6  -1  -5   95.99    4.40
   6   2   5  728.33   29.80
   6  -2  -5  762.02   29.40
  -6   2   5  768.02   29.80
  -6  -2  -5  764.62   29.80
  -6   2   5  766.62   30.80
  -6   2   5  763.62   30.20
   6  -3  -5  193.78    7.70
   6   3   5  194.58    7.80
   6   3   5  185.68    8.00
  -6  -3  -5  193.78    8.00
  -6   3   5  178.08    8.30
  -6   3   5  190.88    8.90
  -6   3   5  194.68    8.00
   6  -4  -5  122.99    5.20
   6   4   5  122.99    5.20
  -6   4   5  120.89    5.50
  -6  -4  -5  125.59    5.50
  -6   4   5  124.59    6.20
  -6   4   5  126.29    5.50
   6   5   5  163.18    6.70
   6  -5  -5  163.28    6.70
  -6   5   5  166.28    7.00
  -6   5   5  161.78    7.00
  -6  -5  -5  155.38    6.90
   6  -6  -5  151.78    6.10
   6   6   5  138.09    6.10
  -6   6   5  152.48    6.40
  -6   6   5  148.59    6.40
   6  -7  -5  400.66   15.20
   6   7   5  369.36   15.10
  -6   7   5  382.86   15.40
  -6   7   5  387.76   15.40
   6  -8  -5  205.88    7.80
   6   8   5  191.58    7.70
  -6   8   5  189.28    7.90
  -6   8   5  186.88    8.00
   6   9   5   59.69    2.50
   6  -9  -5   59.29    2.60
  -6   9   5   56.59    2.70
  -6   9   5   60.89    2.70
   7  -7   5   14.10    1.10
  -7   7  -5   15.00    1.10
   7  -6   5  160.38    6.80
  -7  -6   5  154.48    7.00
  -7   6  -5  166.78    6.70
   7  -5   5   20.10    1.50
  -7   5  -5   21.90    1.40
  -7  -5   5   17.70    1.50
   7  -4   5   86.59    4.00
  -7   4  -5   86.09    3.90
   7  -3   5  227.28    9.60
  -7   3  -5  236.08    9.50
  -7  -3   5  229.38    9.70
   7  -2   5   50.99    2.70
  -7  -2   5   50.69    2.50
  -7  -2   5   51.99    2.80
  -7   2  -5   50.39    2.60
  -7  -2   5   53.39    3.30
  -7  -2   5   51.09    2.80
   7  -1   5  122.39    5.50
  -7  -1   5  135.69    5.40
  -7   1  -5  125.99    5.50
  -7  -1   5  121.59    5.60
  -7  -1   5  121.59    5.70
  -7  -1   5  122.49    6.20
   7   0   5  178.28    8.00
  -7   0   5  189.38    8.30
  -7   0   5  190.38    8.80
  -7   0  -5  194.48    8.00
  -7   0   5  196.78    7.90
   7  -1  -5  121.39    5.10
   7   1   5  119.09    5.50
   7   1   5  127.89    5.30
  -7   1   5  117.79    5.70
  -7   1   5  130.89    5.50
  -7  -1  -5  132.39    5.60
  -7   1   5  130.19    6.30
   7   2   5   52.69    2.50
   7  -2  -5   50.39    2.30
  -7   2   5   51.39    3.30
  -7   2   5   56.69    2.70
  -7  -2  -5   52.09    2.70
   7   3   5  253.17    9.90
   7  -3  -5  245.88    9.70
  -7  -3  -5  239.98   10.10
  -7   3   5  242.48   10.10
  -7   3   5  243.78   10.60
   7  -4  -5   90.79    3.90
   7   4   5   91.09    4.00
  -7   4   5   94.39    4.30
  -7   4   5   91.99    4.20
  -7  -4  -5   91.29    4.20
   7  -5  -5   24.20    1.30
   7   5   5   20.90    1.30
  -7   5   5   22.40    1.50
  -7  -5  -5   20.00    1.40
  -7   5   5   22.70    1.50
   7  -6  -5  179.58    6.90
   7   6   5  167.78    6.90
  -7   6   5  176.18    7.20
  -7   6   5  164.18    7.10
   7  -7  -5   13.90    0.90
   7   7   5   15.30    0.90
  -7   7   5   15.00    1.10
  -7   7   5   15.30    1.10
   8  -5   5  108.19    4.60
  -8   5  -5  112.49    4.60
   8  -4   5   74.89    3.30
  -8   4  -5   73.19    3.20
   8  -3   5  214.38    8.70
   8  -2   5    4.20    0.70
  -8   2  -5    3.80    0.60
  -8  -2   5    3.90    0.70
   8  -1   5   81.59    3.60
  -8   1  -5   88.59    3.90
  -8  -1   5   86.49    3.90
  -8  -1   5   83.19    3.70
   8   0   5   93.59    4.20
  -8   0   5  104.19    4.60
  -8   0   5  104.79    4.40
  -8   0  -5   99.79    4.50
   8   1   5   84.39    3.70
  -8  -1  -5   88.79    4.00
  -8   1   5   89.79    4.10
  -8   1   5   87.29    3.90
   8   2   5    4.50    0.60
  -8   2   5    3.10    0.60
  -8  -2  -5    3.60    0.70
  -8   2   5    4.30    0.80
   8  -3  -5  230.88    9.30
   8   3   5  236.48    9.40
  -8   3   5  238.88    9.70
  -8   3   5  246.48    9.60
  -8  -3  -5  234.58    9.60
   8   4   5   79.39    3.40
   8  -4  -5   78.19    3.20
  -8   4   5   84.79    3.50
  -8   4   5   78.69    3.50
  -8  -4  -5   76.79    3.50
   8  -5  -5  111.79    4.70
   8   5   5  119.89    4.80
  -8   5   5  120.89    4.90
   0 -12   6   59.79    3.20
   0 -11   6  171.98    7.70
   0 -11   6  157.38    7.20
   0 -10   6  176.38    7.80
   0  -9   6    1.20    0.70
   0  -8   6   75.39    3.70
   0   8  -6   68.29    5.00
   0   7  -6   56.89    4.20
   0  -7   6   65.49    3.20
   0   6  -6   82.59    4.90
   0   5  -6  215.68    9.90
   0  -5   6  215.18   10.60
   0  -4   6  227.08   11.10
   0   4  -6  237.78   10.40
   0  -3   6  213.18   10.60
   0   3  -6  232.78    9.80
   0   2  -6  413.26   16.70
   0  -2   6  400.96   16.40
   0  -1   6  406.66   24.80
   0  -1   6  369.66   16.40
   0   1  -6  424.36   16.30
   0  -1   6  393.36   16.20
   0   0  -6 6219.88  225.68
   0   0   6 5926.81  226.18
   0   0   6 5440.26  235.08
   0   1   6  376.66   24.30
   0   1   6  398.06   16.30
   0   2   6  492.45   29.30
   0   2   6  431.56   18.30
   0   2   6  428.46   18.80
   0  -3  -6  244.88   11.10
   0   3   6  225.18   10.30
   0   3   6  249.08   10.90
   0   4   6  245.78   11.00
   0  -4  -6  226.18   11.00
   0   4   6  226.48   10.10
   0   5   6  243.28   11.40
   0   5   6  231.28   11.00
   0  -5  -6  223.38   11.20
   0   6   6   75.99    5.10
   0  -6  -6   86.99    5.60
   0  -7  -6   56.49    4.70
   0   7   6   61.89    4.60
   0  -8  -6   62.89    5.30
   0   8   6   66.29    3.10
   0  -8  -6   64.69    3.20
   0   9   6    1.80    0.60
   0  10   6  162.28    6.80
   0  11   6  151.58    6.20
   0  12   6   63.69    2.70
   1 -12   6   57.39    3.10
  -1 -12   6   61.59    3.20
   1 -11   6   45.90    2.90
   1 -11   6   41.90    2.40
   1 -11   6   36.80    2.10
  -1 -11   6   43.20    2.80
  -1 -11   6   42.80    2.50
  -1  11  -6   39.80    2.20
   1 -10   6   41.60    2.90
   1 -10   6   40.70    2.50
  -1 -10   6   40.40    2.50
  -1  10  -6   37.20    2.30
   1  -9   6   20.90    1.70
   1  -9   6   19.20    2.10
  -1  -9   6   19.70    1.70
  -1   9  -6   19.70    1.70
   1  -8   6   94.99    4.80
  -1  -8   6  103.09    4.70
  -1   8  -6  101.49    4.70
   1  -7   6  114.39    7.30
   1   7  -6  120.19    6.70
   1  -7   6  116.69    5.30
  -1   7  -6  115.59    6.50
   1   6  -6  132.99    7.30
   1  -6   6  143.59    8.20
  -1   6  -6  145.69    7.30
   1  -5   6  305.07   14.30
   1   5  -6  299.27   13.30
  -1   5  -6  293.67   13.10
   1  -4   6 1294.57   53.09
   1   4  -6 1333.07   52.09
  -1   4  -6 1316.97   51.89
   1  -3   6  153.78    8.10
   1   3  -6  148.99    7.10
  -1   3  -6  151.88    7.10
   1   2  -6  529.85   21.90
   1  -2   6  535.65   21.70
  -1   2  -6  553.64   21.90
  -1  -2   6  543.85   33.40
   1   1  -6  427.66   16.40
   1  -1   6  408.56   16.40
   1  -1   6  347.17   16.60
  -1   1  -6  398.06   16.40
  -1  -1   6  422.46   27.20
   1   0   6 1747.63   67.29
   1   0   6 1707.13   67.09
  -1   0   6 1666.83   79.79
  -1   0  -6 1760.72   66.89
  -1   0   6 1727.53   69.09
   1   1   6  412.56   16.90
   1   1   6  398.56   16.60
  -1   1   6  392.66   18.40
  -1   1   6  381.16   27.10
  -1   1   6  433.36   17.10
   1   2   6  528.05   31.40
   1  -2  -6  585.34   23.30
   1   2   6  553.54   22.60
   1   2   6  559.94   23.10
  -1   2   6  528.45   24.40
  -1   2   6  593.94   23.30
   1  -3  -6  148.99    7.30
   1   3   6  145.99    7.20
   1   3   6  143.59    6.70
  -1   3   6  122.89    8.00
  -1   3   6  143.49    7.20
   1  -4  -6 1219.58   50.49
   1   4   6 1271.17   49.70
   1   4   6 1279.37   50.39
  -1   4   6 1168.08   51.69
  -1   4   6 1362.06   50.49
   1  -5  -6  291.97   14.10
   1   5   6  353.16   15.60
   1   5   6  297.87   14.00
  -1   5   6  326.07   13.50
  -1   5   6  280.37   15.30
  -1  -5  -6  294.97   14.10
  -1   5   6  306.27   13.90
   1   6   6  143.89    7.90
   1  -6  -6  148.59    8.10
  -1   6   6  128.79    7.50
  -1  -6  -6  139.89    7.90
   1   7   6  110.99    7.00
   1  -7  -6  117.79    7.30
   1  -8  -6  101.59    4.50
   1   8   6   92.79    4.30
  -1   8   6   98.29    4.40
   1   9   6   18.00    1.30
  -1   9   6   17.50    1.30
   1  10   6   37.70    1.80
  -1  10   6   34.90    2.00
   1  11   6   38.70    1.90
  -1  11   6   39.90    1.90
   1  12   6   60.49    2.60
  -1  12   6   60.19    2.60
   2 -11   6    6.00    1.10
   2 -11   6    5.70    0.80
  -2  11  -6    6.20    0.80
  -2 -11   6    7.10    1.00
   2 -10   6  207.68    9.00
   2 -10   6  213.28    9.40
   2 -10   6  211.88    9.90
  -2  10  -6  221.98    9.20
  -2 -10   6  237.38    9.40
   2  -9   6   42.80    3.10
   2  -9   6   41.30    2.30
   2  -9   6   43.90    2.70
  -2  -9   6   40.90    2.70
  -2   9  -6   44.70    2.60
   2  -8   6  280.67   12.50
   2  -8   6  276.97   11.90
  -2  -8   6  289.37   11.60
  -2   8  -6  272.17   11.60
   2  -7   6  119.19    5.40
   2  -7   6  110.49    7.50
   2   7  -6  119.39    6.90
  -2   7  -6  105.89    6.30
   2  -6   6   50.29    4.50
   2  -6   6   48.20    2.70
   2   6  -6   50.49    3.90
  -2   6  -6   49.50    3.60
   2  -5   6  783.02   33.40
   2   5  -6  800.42   32.30
  -2   5  -6  771.52   31.90
   2   4  -6   80.19    4.60
   2  -4   6   71.59    5.20
  -2   4  -6   69.69    4.20
   2   3  -6  164.38    7.70
   2  -3   6  148.99    8.50
  -2   3  -6  162.48    7.50
   2  -2   6 1107.09   46.60
   2   2  -6 1099.39   45.40
   2  -2   6 1201.78   45.40
  -2   2  -6 1186.28   45.40
   2   1  -6  721.43   27.90
   2  -1   6  679.63   27.90
  -2   1  -6  697.43   27.90
  -2  -1   6  681.23   30.80
   2   0   6 5716.83  227.48
   2   0   6 5690.33  227.48
  -2   0  -6 6241.08  227.58
  -2   0   6 5938.51  230.38
   2   1   6  658.93   28.20
   2  -1  -6  756.22   28.50
   2   1   6  728.93   28.10
  -2  -1  -6  665.83   27.70
  -2   1   6  666.43   30.60
   2   2   6 1169.78   45.40
   2   2   6 1068.59   45.70
   2  -2  -6 1144.29   45.80
  -2   2   6 1197.98   48.50
   2   3   6  153.28    7.50
   2   3   6  156.88    8.00
   2  -3  -6  167.28    8.10
  -2   3   6  156.58    9.80
  -2   3   6  155.08    8.00
   2   4   6   73.79    4.80
   2   4   6   72.09    4.30
   2  -4  -6   70.99    4.80
  -2   4   6   80.69    6.40
  -2   4   6   72.59    4.70
   2   5   6  775.72   33.40
   2  -5  -6  805.12   33.50
  -2   5   6  819.52   35.80
  -2   5   6  806.72   33.10
   2   6   6   47.90    4.20
   2  -6  -6   51.89    4.40
  -2   6   6   55.49    5.80
   2   7   6  117.09    7.50
   2  -7  -6  129.19    7.70
  -2   7   6  110.79    8.90
   2   8   6  252.77   10.60
   2  -8  -6  270.87   10.80
  -2   8   6  259.97   10.70
   2   9   6   42.30    2.10
   2   9   6   40.10    2.20
  -2   9   6   43.10    2.30
   2  10   6  222.58    8.70
  -2  10   6  212.98    8.90
   2  11   6    6.40    0.60
   3 -11   6   45.10    2.20
  -3 -11   6   43.80    3.10
  -3  11  -6   48.60    2.30
   3 -10   6  242.08   10.30
   3 -10   6  252.57   11.10
  -3  10  -6  266.27   10.50
  -3 -10   6  250.07   10.60
   3  -9   6  294.87   13.00
   3  -9   6  277.77   11.90
  -3   9  -6  291.77   12.10
  -3  -9   6  309.07   12.30
   3  -8   6  211.68    9.30
   3  -8   6  214.08    9.90
   3  -8   6  201.38    8.80
  -3   8  -6  204.48    8.90
  -3  -8   6  216.18    9.00
   3  -7   6  400.76   16.80
   3  -7   6  439.96   18.10
   3  -7   6  429.46   17.40
  -3  -7   6  420.86   16.90
  -3   7  -6  414.86   17.00
   3  -6   6   29.00    3.70
   3   6  -6   28.40    3.20
   3  -6   6   31.40    2.10
  -3   6  -6   26.90    2.70
   3   5  -6 1490.95   59.69
   3  -5   6 1530.95   60.89
   3  -5   6 1455.05   57.99
  -3   5  -6 1481.05   59.19
   3  -4   6  131.59    8.00
   3   4  -6  136.79    7.20
  -3   4  -6  126.39    6.70
   3  -3   6  122.49    7.40
   3   3  -6  117.79    6.40
  -3   3  -6  119.39    6.20
   3  -2   6  255.27   12.50
   3   2  -6  243.48   11.30
   3  -2   6  258.77   11.20
  -3   2  -6  256.57   11.30
  -3  -2   6  238.58   14.60
   3  -1   6  898.81   37.10
   3  -1   6  857.01   35.80
  -3  -1   6  888.61   39.70
  -3   1  -6  921.21   35.80
   3   0   6  452.05   20.40
   3   0   6  472.85   19.60
  -3   0   6  466.85   23.00
  -3   0  -6  472.05   19.40
   3   1   6  840.42   34.30
   3   1   6  834.02   34.10
  -3   1   6  852.01   37.70
  -3  -1  -6  842.62   33.80
   3   2   6  258.37   11.50
   3  -2  -6  247.98   12.60
   3   2   6  249.08   11.90
  -3   2   6  248.98   14.50
  -3  -2  -6  256.57   11.10
   3   3   6  115.69    6.70
   3  -3  -6  111.19    6.40
   3   3   6  116.89    6.20
  -3   3   6  116.89    6.60
  -3   3   6  116.69    8.90
   3  -4  -6  146.99    7.80
   3   4   6  132.49    7.10
   3   4   6  126.39    7.70
  -3   4   6  159.48   10.40
  -3   4   6  133.79    7.60
   3  -5  -6 1472.65   59.49
   3   5   6 1441.96   59.69
  -3   5   6 1438.66   57.29
  -3   5   6 1535.25   62.79
   3   6   6   32.20    3.50
   3  -6  -6   28.30    3.40
  -3   6   6   29.30    4.70
   3   7   6  392.46   16.20
   3  -7  -6  419.16   16.40
  -3   7   6  409.66   16.30
  -3   7   6  413.96   16.40
   3   8   6  193.58    8.30
   3   8   6  207.38    8.20
  -3   8   6  202.28    8.40
  -3   8   6  205.38    8.40
   3   9   6  304.67   11.80
  -3   9   6  294.57   12.00
  -3   9   6  294.07   12.10
   3  10   6  243.28    9.90
  -3  10   6  255.87   10.20
   3  11   6   46.80    2.20
  -3  11   6   51.79    2.60
   4 -10   6  188.68    7.80
  -4 -10   6  177.78    8.00
  -4  10  -6  199.18    7.90
   4  -9   6   56.19    3.50
   4  -9   6   56.89    2.90
  -4   9  -6   59.09    3.00
  -4  -9   6   58.49    3.10
   4  -8   6  161.08    7.00
   4  -8   6  163.08    7.90
  -4   8  -6  155.88    6.80
  -4   8  -6  162.28    7.00
  -4  -8   6  163.88    7.20
   4  -7   6  288.07   12.40
   4  -7   6  293.77   11.90
   4  -7   6  294.27   13.00
  -4   7  -6  289.27   12.00
  -4   7  -6  278.57   11.80
  -4  -7   6  299.37   12.00
   4  -6   6  197.08    9.10
   4  -6   6  185.08    8.00
   4  -6   6  194.88    8.50
  -4  -6   6  188.58    8.00
  -4   6  -6  188.08    8.00
  -4   6  -6  185.58    8.10
   4  -5   6  209.78   11.40
   4  -5   6  207.78    9.00
  -4   5  -6  192.08    9.90
   4  -4   6  177.28    8.10
   4  -4   6  192.48   10.60
  -4   4  -6  190.98    9.30
   4  -3   6  662.03   26.90
   4  -3   6  664.03   29.40
  -4   3  -6  673.33   28.10
  -4  -3   6  709.53   33.80
   4  -2   6  361.66   15.70
   4  -2   6  367.56   17.40
   4  -2   6  366.76   16.10
  -4   2  -6  381.56   16.20
  -4  -2   6  375.66   20.90
   4  -1   6  212.28   10.30
   4  -1   6  226.28   11.40
  -4  -1   6  206.58   14.00
  -4   1  -6  229.68   10.40
   4   0   6    7.10    1.70
  -4   0  -6    5.60    1.40
  -4   0   6    3.80    2.40
   4   1   6  213.18   10.40
  -4   1   6  208.88   13.90
  -4  -1  -6  225.18   10.20
   4   2   6  369.76   16.30
   4   2   6  369.26   16.70
  -4  -2  -6  356.16   15.90
  -4   2   6  348.67   20.00
  -4   2   6  386.46   15.30
   4   3   6  667.43   27.10
   4   3   6  671.93   27.90
  -4   3   6  612.04   25.50
  -4   3   6  626.24   31.10
   4   4   6  174.58    9.80
   4   4   6  172.68    8.90
  -4   4   6  186.08    9.50
  -4   4   6  174.38   12.30
  -4   4   6  173.18    7.70
   4  -5  -6  185.48   10.60
   4   5   6  201.78   10.80
  -4   5   6  185.88   12.90
  -4   5   6  194.28    8.40
   4   6   6  186.68    7.70
   4  -6  -6  174.48    7.70
  -4   6   6  186.28    7.80
  -4   6   6  185.38    7.80
  -4   6   6  187.38    8.50
   4   7   6  284.67   11.50
   4   7   6  287.87   11.40
  -4   7   6  277.37   11.60
  -4   7   6  289.27   11.70
   4   8   6  171.18    7.10
  -4   8   6  175.38    7.30
  -4   8   6  171.08    7.30
   4   9   6   57.39    2.70
  -4   9   6   63.09    3.00
  -4   9   6   61.29    3.00
   4 -10  -6  223.48    8.40
   4  10   6  203.48    8.40
  -4  10   6  207.68    8.60
  -4  10   6  206.48    8.50
   5 -10   6  169.58    6.90
  -5  10  -6  167.98    6.90
   5  -9   6  164.38    6.60
  -5   9  -6  156.68    6.50
  -5   9  -6  153.68    6.40
  -5  -9   6  147.79    6.70
   5  -8   6  150.88    6.40
  -5   8  -6  153.98    6.40
  -5   8  -6  147.99    6.30
  -5  -8   6  142.09    6.50
   5  -7   6  398.56   16.20
   5  -7   6  388.36   16.90
  -5   7  -6  398.46   16.00
  -5   7  -6  398.06   16.10
  -5  -7   6  422.36   16.40
   5  -6   6  308.27   12.90
   5  -6   6  311.07   13.70
  -5  -6   6  326.67   12.90
  -5   6  -6  309.97   12.70
   5  -5   6  807.92   32.40
   5  -5   6  805.42   31.30
  -5  -5   6  781.12   31.30
  -5   5  -6  790.92   31.20
   5  -4   6  259.97   11.90
   5  -4   6  254.77   10.90
  -5  -4   6  286.17   11.10
  -5   4  -6  257.37   10.80
  -5   3  -6   80.99    5.20
  -5  -3   6   82.59    3.90
  -5  -3   6   76.69    8.90
   5  -2   6  427.36   19.10
  -5  -2   6  457.55   25.10
  -5  -2   6  430.26   17.60
  -5   2  -6  440.46   19.20
   5  -1   6 1121.89   45.20
  -5   1  -6 1093.19   45.10
  -5  -1   6 1119.19   43.50
  -5  -1   6 1121.89   51.19
   5   0   6  325.87   14.70
  -5   0   6  304.27   19.20
  -5   0  -6  326.67   14.50
  -5   0   6  314.47   13.00
   5   1   6 1089.99   44.20
  -5   1   6 1070.79   42.40
  -5  -1  -6 1116.69   43.90
  -5   1   6 1053.69   49.50
   5   2   6  450.95   19.60
  -5   2   6  460.05   24.60
  -5  -2  -6  397.46   18.90
  -5   2   6  456.65   17.90
   5   3   6   80.19    5.40
   5   3   6   83.39    6.10
  -5   3   6   80.09    8.40
  -5   3   6   87.49    4.30
   5  -4  -6  266.97   10.40
   5   4   6  260.17   10.60
  -5   4   6  255.97   11.50
  -5   4   6  249.68   10.60
  -5   4   6  270.47   11.10
  -5   4   6  255.67   10.70
  -5  -4  -6  260.07   10.70
   5   5   6  788.72   32.00
   5  -5  -6  847.32   31.80
  -5  -5  -6  816.22   32.00
  -5   5   6  829.32   33.00
  -5   5   6  818.72   32.10
  -5   5   6  808.02   32.10
   5   6   6  310.17   12.40
   5  -6  -6  322.77   12.40
   5   6   6  301.27   12.50
  -5   6   6  311.17   13.60
  -5   6   6  311.97   12.70
  -5   6   6  313.47   12.70
   5  -7  -6  438.86   17.20
   5   7   6  438.46   17.20
  -5   7   6  434.06   17.50
  -5   7   6  434.36   17.50
   5   8   6  158.58    6.70
   5  -8  -6  168.88    6.80
  -5   8   6  170.48    7.00
  -5   8   6  165.08    7.00
   5   9   6  176.48    7.20
   5  -9  -6  184.28    7.30
  -5   9   6  180.48    7.40
  -5   9   6  178.08    7.40
   5  10   6  182.48    6.90
   5 -10  -6  180.58    6.90
  -5  10   6  171.08    7.00
  -5  10   6  163.48    7.00
   6  -8   6   70.99    3.10
  -6  -8   6   56.29    3.20
  -6   8  -6   70.69    3.00
   6  -7   6   47.70    2.40
  -6  -7   6   40.20    2.50
  -6   7  -6   45.50    2.30
   6  -6   6  120.79    5.30
  -6   6  -6  121.29    5.20
  -6  -6   6  114.19    5.40
   6  -5   6  199.68    8.30
  -6  -5   6  198.28    8.40
  -6   5  -6  189.98    8.20
   6  -4   6  205.88    8.70
  -6   4  -6  209.48    8.60
  -6  -4   6  208.18    8.80
  -6  -4   6  199.58    9.60
   6  -3   6  476.55   19.30
  -6  -3   6  497.75   19.50
  -6   3  -6  472.95   19.20
   6  -2   6    4.50    0.90
  -6  -2   6    3.50    0.90
  -6   2  -6    3.60    0.70
  -6   2  -6    3.60    0.80
   6  -1   6  898.31   35.50
  -6  -1   6  925.01   35.80
  -6  -1   6  908.91   36.40
  -6   1  -6  894.11   35.40
   6   0   6  275.57   11.30
  -6   0   6  270.17   12.10
  -6   0   6  281.77   11.60
  -6   0  -6  270.47   11.20
   6   1   6  880.21   35.30
  -6   1   6  955.30   35.70
  -6   1   6  883.01   36.20
  -6  -1  -6  883.51   35.20
  -6   1   6  902.31   35.20
   6   2   6    3.90    0.80
   6  -2  -6    3.10    0.70
  -6  -2  -6    2.10    0.60
  -6   2   6    2.80    0.70
  -6   2   6    5.00    1.20
  -6   2   6    3.30    0.90
   6   3   6  475.45   19.20
   6  -3  -6  483.35   18.90
  -6   3   6  495.85   19.20
  -6   3   6  480.25   19.70
  -6   3   6  479.25   20.20
  -6  -3  -6  484.95   19.30
   6   4   6  212.38    8.70
   6   4   6  210.98    8.80
   6  -4  -6  214.88    8.50
  -6   4   6  202.88    8.80
  -6   4   6  211.48    9.70
  -6   4   6  220.38    8.90
  -6  -4  -6  215.08    8.90
   6   5   6  202.88    8.20
   6  -5  -6  207.08    8.10
  -6   5   6  200.38    8.40
  -6  -5  -6  198.08    8.40
  -6   5   6  195.28    8.90
  -6   5   6  203.38    8.50
   6  -6  -6  128.29    5.30
   6   6   6  124.39    5.30
  -6   6   6  128.29    5.60
  -6   6   6  125.59    5.50
   6   7   6   45.60    2.20
   6  -7  -6   46.00    2.20
  -6   7   6   47.50    2.40
  -6   7   6   49.99    2.50
   6   8   6   77.59    3.40
   6  -8  -6   79.59    3.40
  -6   8   6   78.39    3.60
  -6   8   6   82.99    3.60
   7  -7   6  136.79    5.80
  -7   7  -6  143.39    5.80
   7  -6   6   19.00    1.20
  -7  -6   6   12.70    1.20
  -7   6  -6   18.20    1.20
   7  -5   6  327.07   12.60
  -7  -5   6  284.37   12.70
  -7   5  -6  320.77   12.50
   7  -4   6  362.56   14.40
  -7   4  -6  351.16   14.30
   7  -3   6   68.79    3.30
  -7  -3   6   63.49    3.40
  -7   3  -6   68.59    3.20
   7  -2   6   21.80    1.60
  -7  -2   6   22.50    1.70
  -7  -2   6   22.90    2.00
  -7  -2   6   23.60    1.60
  -7   2  -6   20.80    1.50
   7  -1   6   19.70    1.50
  -7  -1   6   19.30    1.40
  -7  -1   6   18.30    1.50
  -7  -1   6   18.80    1.60
  -7  -1   6   20.20    1.90
  -7   1  -6   18.30    1.40
   7   0   6  184.68    7.90
  -7   0   6  184.88    7.80
  -7   0  -6  197.68    8.00
  -7   0   6  189.28    8.70
  -7   0   6  187.48    8.20
   7   1   6   20.10    1.50
  -7   1   6   20.00    1.60
  -7  -1  -6   19.60    1.50
  -7   1   6   18.80    1.40
  -7   1   6   21.30    2.00
   7   2   6   21.70    1.50
  -7   2   6   22.80    2.00
  -7   2   6   25.50    2.50
  -7  -2  -6   23.50    1.60
  -7   2   6   21.50    1.50
   7   3   6   66.99    3.20
   7   3   6   71.99    3.10
   7  -3  -6   62.39    2.90
  -7   3   6   68.49    3.80
  -7   3   6   67.69    3.20
  -7  -3  -6   68.79    3.30
   7  -4  -6  349.37   14.10
   7   4   6  371.86   14.30
  -7   4   6  362.46   14.50
  -7  -4  -6  365.06   14.50
   7   5   6  320.67   12.90
   7  -5  -6  324.67   12.80
  -7   5   6  323.17   13.10
  -7  -5  -6  327.87   13.10
  -7   5   6  343.87   13.20
   7   6   6   18.40    1.10
   7  -6  -6   18.80    1.00
  -7   6   6   18.70    1.20
  -7   6   6   17.40    1.20
   7  -7  -6  140.69    5.80
   7   7   6  150.28    5.90
  -7   7   6  147.89    6.00
  -7   7   6  146.89    6.00
   8  -4   6    9.70    0.80
  -8   4  -6    9.10    0.70
   8  -3   6   30.80    1.70
   8  -2   6   36.00    2.00
  -8   2  -6   39.00    2.00
  -8  -2   6   42.10    2.10
   8  -1   6   75.59    3.50
  -8   1  -6   78.59    3.50
  -8  -1   6   80.69    3.60
   8   0   6    8.40    0.90
  -8   0   6    9.70    0.80
  -8   0  -6    9.70    0.90
  -8   0   6   10.10    1.00
   8   1   6   74.69    3.40
  -8  -1  -6   83.69    3.60
  -8   1   6   75.39    3.40
  -8   1   6   79.99    3.70
   8   2   6   41.10    1.90
  -8  -2  -6   42.30    2.10
  -8   2   6   41.10    2.20
  -8   2   6   38.40    2.00
   8   3   6   31.70    1.60
  -8  -3  -6   32.30    1.80
  -8   3   6   33.60    1.80
  -8   3   6   31.20    1.70
   8   4   6   10.40    0.70
  -8  -4  -6    8.70    0.80
  -8   4   6    9.20    0.80
  -8   4   6    9.60    0.80
   0 -11   7    2.10    0.70
   0 -11   7    2.60    0.70
   0 -10   7    6.30    1.30
   0 -10   7    7.80    1.10
   0  -9   7  376.96   15.40
   0  -8   7   17.00    1.40
   0   7  -7   11.50    2.20
   0   6  -7   13.50    2.00
   0  -5   7   23.60    2.90
   0   5  -7   23.10    2.30
   0  -4   7   12.70    2.20
   0   4  -7   11.20    1.80
   0  -3   7   27.60    2.90
   0   3  -7   25.20    2.10
   0  -2   7   41.00    2.50
   0   2  -7   44.70    2.80
   0  -1   7  431.96   17.60
   0  -1   7  409.26   17.90
   0   1  -7  449.16   17.60
   0   0   7    0.80    0.70
   0   0   7    0.80    0.70
   0   1   7  444.06   28.60
   0   1   7  474.35   18.60
   0   1   7  435.06   18.90
   0   2   7   41.70    2.80
   0   2   7   44.20    3.20
   0   3   7   33.50    2.40
   0   3   7   27.20    2.60
   0   4   7    7.80    1.60
   0   4   7    9.50    1.50
   0  -4  -7    8.10    1.90
   0  -5  -7   25.40    3.00
   0   5   7   21.80    2.10
   0   5   7   27.00    2.80
   0   6   7   22.60    2.70
   0  -6  -7   16.10    2.70
   0   7   7    8.30    2.10
   0  -7  -7    8.50    2.40
   0   8   7   15.30    1.20
   0  -8  -7   16.20    1.40
   0   9   7  352.66   14.10
   0  10   7    7.90    0.90
   1 -11   7   32.20    2.10
   1 -11   7   35.50    2.50
  -1  11  -7   33.00    1.90
  -1 -11   7   38.50    2.50
  -1 -11   7   36.70    2.10
   1 -10   7   80.39    4.60
   1 -10   7   82.19    4.20
  -1 -10   7   88.19    4.10
  -1  10  -7   82.49    3.90
   1  -9   7    1.20    0.70
   1  -9   7    2.80    0.90
  -1  -9   7    1.60    0.70
  -1   9  -7    2.20    0.70
   1  -8   7  249.18   10.50
  -1   8  -7  249.58   10.40
  -1  -8   7  245.08   10.40
   1   7  -7  219.58   10.90
   1  -7   7  221.68    9.20
  -1   7  -7  212.88   10.60
   1   6  -7   35.70    3.20
   1  -6   7   31.50    3.60
  -1   6  -7   30.30    2.80
   1  -5   7  540.55   24.20
   1   5  -7  563.64   23.10
  -1   5  -7  538.95   22.90
   1  -4   7   88.69    6.00
   1   4  -7   93.49    5.20
  -1   4  -7   91.09    5.00
   1  -3   7  123.89    7.50
   1   3  -7  130.49    6.50
  -1   3  -7  133.99    6.40
   1   2  -7  412.86   17.30
   1  -2   7  416.76   17.20
  -1   2  -7  423.96   17.40
   1  -1   7  113.99    5.70
   1   1  -7  127.49    5.70
  -1   1  -7  118.89    5.60
  -1  -1   7  108.99   13.50
   1   0   7  693.83   27.50
   1   0   7  660.93   27.70
  -1   0   7  724.33   43.10
  -1   0  -7  675.53   27.20
  -1   0   7  665.03   27.90
   1   1   7  117.49    5.70
   1   1   7  113.59    6.00
  -1   1   7  115.39    6.10
   1   2   7  423.26   18.50
   1   2   7  439.06   18.10
  -1   2   7  439.16   18.70
   1   3   7  133.79    7.00
   1  -3  -7  134.79    7.20
   1   3   7  130.09    6.40
  -1   3   7  119.99    6.80
   1   4   7   88.49    5.50
   1   4   7   99.89    5.20
   1  -4  -7   87.79    5.70
  -1   4   7   96.09    5.70
   1  -5  -7  566.84   24.30
   1   5   7  556.44   24.10
   1   5   7  556.44   23.20
  -1   5   7  531.95   23.00
  -1   5   7  579.44   24.10
   1  -6  -7   30.80    3.50
   1   6   7   31.40    3.30
  -1   6   7   34.00    3.30
  -1   6   7   29.40    1.90
   1   7   7  200.38   11.00
   1  -7  -7  220.18   11.50
   1   8   7  235.68    9.70
   1  -8  -7  238.98    9.80
  -1   8   7  237.08    9.70
   1   9   7    1.60    0.50
  -1   9   7    1.00    0.50
   1  10   7   77.29    3.50
  -1  10   7   80.49    3.60
   1  11   7   33.10    1.60
  -1  11   7   35.20    1.80
   2 -11   7   54.89    3.20
  -2  11  -7   57.09    2.70
  -2 -11   7   55.09    2.80
   2 -10   7   92.49    4.60
   2 -10   7   89.29    5.00
  -2 -10   7   99.39    4.50
  -2  10  -7   97.69    4.40
   2  -9   7   86.39    4.80
   2  -9   7   90.69    4.40
  -2  -9   7   71.79    4.10
  -2   9  -7   89.09    4.10
   2  -8   7   93.29    4.70
   2  -8   7   93.09    5.20
  -2  -8   7  103.09    4.50
  -2   8  -7   87.99    4.50
   2  -7   7   97.19    4.60
  -2   7  -7   91.19    4.40
   2  -6   7   93.39    4.40
   2  -6   7   90.49    6.60
   2   6  -7   91.09    5.80
  -2   6  -7   90.79    5.50
   2  -5   7   62.99    5.20
   2  -5   7   59.79    3.10
   2   5  -7   64.39    4.40
  -2   5  -7   62.69    4.10
   2  -4   7   55.29    4.70
   2   4  -7   62.69    4.00
  -2   4  -7   55.29    3.70
   2  -3   7  422.76   19.40
   2   3  -7  404.36   18.00
  -2   3  -7  449.36   18.00
   2  -2   7  466.05   20.30
   2  -2   7  425.46   18.60
   2   2  -7  437.96   18.70
  -2   2  -7  460.45   18.70
   2  -1   7  986.20   40.80
  -2  -1   7 1020.90   44.20
  -2   1  -7 1070.79   40.80
   2   0   7 3134.19  124.79
  -2   0  -7 3272.27  124.49
  -2   0   7 3237.88  128.19
   2   1   7 1052.99   41.20
   2   1   7 1047.40   41.40
  -2   1   7  989.60   44.00
   2   2   7  434.76   19.20
   2   2   7  442.96   18.80
   2  -2  -7  427.46   19.20
  -2   2   7  477.55   19.50
  -2   2   7  448.56   21.60
   2  -3  -7  433.56   19.00
   2   3   7  423.86   18.20
   2   3   7  413.06   18.80
  -2   3   7  434.16   18.90
  -2   3   7  443.26   21.10
   2   4   7   53.59    4.20
   2  -4  -7   56.49    4.30
   2   4   7   55.09    3.70
  -2   4   7   56.99    5.60
  -2   4   7   61.69    4.30
   2  -5  -7   58.29    4.70
   2   5   7   66.39    4.80
   2   5   7   64.39    4.10
  -2   5   7   61.49    3.20
  -2   5   7   62.69    6.10
  -2   5   7   62.49    4.60
   2   6   7  101.99    6.50
   2  -6  -7   91.19    6.20
  -2   6   7   90.39    6.40
  -2   6   7   82.49    4.30
   2   7   7   90.79    4.00
   2  -7  -7   89.69    4.10
  -2   7   7   87.19    4.00
  -2   7   7   83.59    4.60
   2   8   7   84.19    3.90
   2  -8  -7   89.39    4.10
  -2   8   7   84.49    3.90
  -2   8   7   82.89    3.90
   2   9   7   83.49    3.80
  -2   9   7   86.39    3.90
   2  10   7   93.89    4.10
  -2  10   7   99.89    4.30
   2  11   7   59.49    2.60
  -2  11   7   57.69    2.70
   3 -11   7   24.00    1.70
   3 -11   7   22.20    1.30
  -3  11  -7   23.60    1.40
   3 -10   7    3.90    0.70
   3 -10   7    4.30    1.10
  -3  10  -7    5.10    0.80
   3  -9   7   21.80    1.50
   3  -9   7   23.40    2.20
  -3  -9   7   23.60    1.80
  -3   9  -7   21.90    1.70
   3  -8   7  226.48    9.80
   3  -8   7  233.28   10.90
   3  -8   7  241.88   10.40
  -3   8  -7  223.98   10.00
  -3  -8   7  265.97   10.10
   3  -7   7   25.80    2.00
   3  -7   7   25.20    2.40
   3  -7   7   24.00    1.70
  -3   7  -7   22.50    1.70
   3  -6   7  442.76   20.80
   3   6  -7  440.16   19.80
   3  -6   7  434.76   17.80
  -3   6  -7  418.66   17.50
  -3   6  -7  434.56   19.00
   3   5  -7  103.19    6.40
   3  -5   7   99.49    7.10
   3  -5   7  103.89    5.00
  -3   5  -7  107.79    6.00
   3   4  -7  466.65   20.20
   3  -4   7  438.96   18.50
   3  -4   7  449.95   21.20
  -3   4  -7  488.55   19.80
   3  -3   7  707.23   31.40
   3   3  -7  716.93   30.10
  -3   3  -7  758.52   30.00
   3  -2   7  138.99    8.40
   3   2  -7  137.99    7.20
   3  -2   7  142.49    7.10
  -3  -2   7  142.79   10.60
  -3   2  -7  146.99    7.20
   3  -1   7  178.58    9.80
   3  -1   7  177.08    8.60
  -3  -1   7  182.68   12.00
  -3   1  -7  174.48    8.50
   3   0   7  148.99    7.70
  -3   0  -7  159.28    7.50
  -3   0   7  153.38   10.70
   3   1   7  177.08    8.60
   3   1   7  172.18    8.80
  -3   1   7  174.28   11.60
  -3  -1  -7  169.38    8.10
   3   2   7  145.79    7.50
   3   2   7  145.09    7.90
  -3   2   7  145.99   10.40
   3   3   7  755.12   30.90
   3  -3  -7  680.43   31.20
   3   3   7  739.13   31.60
  -3   3   7  739.03   31.50
  -3   3   7  836.22   35.30
   3  -4  -7  448.86   20.30
   3   4   7  468.35   20.70
   3   4   7  458.45   19.80
  -3   4   7  472.55   20.40
  -3   4   7  439.46   18.30
  -3   4   7  456.85   23.30
   3   5   7  116.99    7.70
   3  -5  -7  103.99    6.70
   3   5   7  113.39    7.00
  -3   5   7   97.59    8.40
  -3   5   7   95.79    4.80
  -3   5   7   99.39    6.30
   3   6   7  392.06   16.80
   3  -6  -7  437.96   19.50
   3   6   7  437.56   19.80
  -3   6   7  364.86   21.50
  -3   6   7  404.66   16.90
  -3   6   7  445.96   17.60
  -3   6   7  432.46   16.70
   3   7   7   23.60    1.50
   3  -7  -7   22.40    1.70
  -3   7   7   23.60    1.60
  -3   7   7   24.00    1.60
  -3   7   7   22.30    2.00
   3   8   7  215.28    9.10
  -3   8   7  220.38    9.20
  -3   8   7  230.68    9.20
   3   9   7   23.50    1.30
   3   9   7   23.90    1.50
  -3   9   7   22.40    1.50
  -3   9   7   23.10    1.50
   3  10   7    6.50    0.60
  -3  10   7    5.70    0.80
   3  11   7   25.70    1.20
  -3  11   7   23.10    1.30
   4 -10   7   40.20    2.10
  -4  10  -7   46.60    2.20
   4  -9   7  133.39    5.80
   4  -9   7  134.99    6.50
  -4   9  -7  134.69    5.90
  -4  -9   7  138.29    6.10
   4  -8   7   28.70    2.10
   4  -8   7   30.70    1.90
   4  -8   7   30.70    2.50
  -4   8  -7   29.30    1.90
  -4   8  -7   28.60    1.70
  -4  -8   7   31.20    2.00
   4  -7   7   81.09    4.90
   4  -7   7   81.79    4.00
   4  -7   7   85.39    4.40
  -4   7  -7   84.09    4.00
  -4  -7   7   88.29    4.10
  -4   7  -7   81.99    3.90
   4  -6   7  897.41   34.70
   4  -6   7  899.51   35.20
   4  -6   7  893.51   35.90
  -4   6  -7  856.71   34.70
  -4   6  -7  874.91   34.60
   4  -5   7  155.18    6.90
   4  -5   7  168.78    8.00
   4  -5   7  165.88    7.40
  -4   5  -7  155.98    7.00
  -4   5  -7  163.38    6.90
   4  -4   7  626.34   28.00
   4  -4   7  609.54   25.10
  -4   4  -7  632.34   26.40
  -4  -4   7  636.94   32.60
   4  -3   7  367.06   17.40
   4  -3   7  351.16   14.60
  -4   3  -7  356.36   15.90
  -4  -3   7  342.47   20.90
   4  -2   7   71.59    5.60
   4  -2   7   68.89    3.60
   4  -2   7   68.49    4.50
  -4   2  -7   68.99    4.50
  -4  -2   7   69.79    7.80
   4  -1   7  473.35   21.80
   4  -1   7  475.15   19.30
   4  -1   7  483.65   20.60
  -4   1  -7  480.35   20.40
  -4  -1   7  474.65   25.40
   4   0   7   48.30    2.70
   4   0   7   47.70    3.70
  -4   0   7   42.50    5.90
  -4   0  -7   45.00    3.40
   4   1   7  425.06   18.10
   4   1   7  464.35   19.60
  -4   1   7  423.56   17.80
  -4  -1  -7  466.55   19.20
  -4   1   7  466.25   24.10
   4   2   7   71.19    4.80
   4   2   7   64.19    4.90
  -4   2   7   67.49    3.40
  -4   2   7   73.79    7.60
   4   3   7  345.77   16.40
   4   3   7  363.56   15.80
  -4   3   7  330.67   14.10
  -4   3   7  353.56   19.80
  -4   3   7  335.87   16.20
   4   4   7  560.84   25.00
   4   4   7  591.44   26.10
  -4   4   7  610.14   29.60
  -4   4   7  603.74   23.60
  -4   4   7  575.04   25.70
   4   5   7  162.08    7.00
  -4  -5  -7  162.88    7.10
  -4   5   7  165.18    7.00
  -4   5   7  173.28    8.00
  -4   5   7  165.98    7.40
   4   6   7  855.81   34.40
   4  -6  -7  854.01   34.40
  -4   6   7  924.41   34.50
  -4   6   7  897.71   34.50
  -4   6   7  875.21   35.30
   4   7   7   81.39    3.80
  -4   7   7   84.69    3.90
  -4   7   7   82.59    3.90
   4   8   7   30.00    1.70
   4   8   7   30.50    1.60
  -4   8   7   31.70    1.90
  -4   8   7   30.90    1.90
   4   9   7  142.29    6.10
   4  -9  -7  158.68    6.10
  -4   9   7  144.19    6.30
  -4   9   7  152.88    6.30
   4 -10  -7   52.79    2.20
   4  10   7   47.20    2.20
  -4  10   7   48.30    2.30
  -4  10   7   47.90    2.30
   5  -9   7   61.89    2.80
  -5   9  -7   56.89    2.80
  -5   9  -7   59.89    2.70
   5  -8   7  141.29    6.00
  -5   8  -7  136.29    5.90
  -5  -8   7  147.19    6.20
  -5   8  -7  137.59    6.00
   5  -7   7   49.30    3.20
   5  -7   7   48.50    2.60
  -5   7  -7   48.20    2.50
  -5  -7   7   46.00    2.60
  -5   7  -7   49.10    2.50
   5  -6   7   48.60    2.60
   5  -6   7   45.70    3.30
  -5   6  -7   46.80    2.50
  -5  -6   7   45.90    2.60
   5  -5   7 1178.48   46.90
   5  -5   7 1210.78   48.00
  -5   5  -7 1174.38   46.80
  -5  -5   7 1250.37   47.00
   5  -4   7  343.97   13.70
   5  -4   7  319.27   14.10
   5  -4   7  338.07   14.70
  -5  -4   7  346.87   13.80
  -5   4  -7  333.37   13.60
   5  -3   7 1374.46   55.89
   5  -3   7 1441.96   55.49
   5  -3   7 1482.95   56.59
  -5   3  -7 1364.36   55.39
  -5  -3   7 1475.35   55.59
   5  -2   7  507.65   22.00
   5  -2   7  547.45   22.30
   5  -2   7  577.54   21.50
  -5  -2   7  552.44   29.80
  -5   2  -7  497.65   21.20
  -5   2  -7  508.35   23.00
  -5  -2   7  565.14   21.50
   5  -1   7  245.48   11.70
  -5  -1   7  233.98    9.90
  -5   1  -7  243.68   11.50
  -5  -1   7  228.98   16.20
   5   0   7  776.02   32.30
  -5   0   7  800.42   38.30
  -5   0   7  743.33   30.30
  -5   0  -7  759.12   31.90
   5   1   7  242.48   11.70
  -5  -1  -7  234.18   11.20
  -5   1   7  218.58   15.70
  -5   1   7  235.58    9.90
   5   2   7  523.25   23.70
   5   2   7  541.25   21.50
  -5  -2  -7  551.94   21.40
  -5   2   7  557.24   29.10
  -5   2   7  548.65   21.80
  -5  -2  -7  516.75   22.90
   5   3   7 1432.76   54.19
  -5   3   7 1364.16   55.09
  -5   3   7 1436.06   54.59
  -5   3   7 1393.16   54.09
  -5   3   7 1311.27   54.09
  -5  -3  -7 1432.26   54.19
   5   4   7  354.56   14.10
   5  -4  -7  356.46   13.70
  -5  -4  -7  356.06   14.10
  -5   4   7  340.47   14.00
  -5   4   7  337.87   15.00
  -5   4   7  353.46   14.50
  -5   4   7  338.17   14.00
   5   5   7 1164.28   46.30
   5  -5  -7 1209.18   46.00
  -5   5   7 1189.78   47.20
  -5   5   7 1178.98   46.40
  -5   5   7 1192.08   46.40
  -5  -5  -7 1210.98   46.40
   5   6   7   47.60    2.40
   5  -6  -7   49.30    2.20
  -5   6   7   44.80    2.90
  -5   6   7   45.80    2.50
  -5   6   7   45.80    2.50
   5   7   7   51.49    2.40
   5   7   7   50.79    2.50
   5  -7  -7   53.39    2.40
  -5   7   7   52.49    2.70
  -5   7   7   52.29    2.70
   5  -8  -7  160.08    6.40
   5   8   7  150.98    6.40
  -5   8   7  155.18    6.60
  -5   8   7  164.68    6.70
   5   9   7   64.59    2.80
   5  -9  -7   65.19    2.80
  -5   9   7   62.69    2.90
  -5   9   7   66.29    3.00
   6  -8   7   53.79    2.50
  -6   8  -7   52.09    2.40
   6  -7   7   37.60    2.00
  -6   7  -7   36.80    1.90
  -6  -7   7   33.70    2.10
   6  -6   7   81.29    3.90
  -6   6  -7   85.19    3.80
  -6  -6   7   81.29    4.00
   6  -5   7   41.10    2.30
  -6   5  -7   41.90    2.20
  -6  -5   7   41.80    2.40
   6  -4   7  170.68    7.20
  -6  -4   7  173.58    7.30
  -6   4  -7  160.28    7.10
   6  -3   7   57.09    3.00
  -6  -3   7   60.69    3.20
  -6   3  -7   58.09    2.90
   6  -2   7  164.68    7.30
  -6  -2   7  181.18    7.60
  -6   2  -7  165.78    7.20
   6  -1   7  343.47   14.20
  -6   1  -7  346.97   14.10
  -6  -1   7  356.86   14.50
   6   0   7   58.09    3.00
  -6   0   7   52.09    3.50
  -6   0   7   59.79    3.20
  -6   0  -7   56.69    2.90
   6   1   7  339.57   14.20
  -6  -1  -7  339.57   14.20
  -6   1   7  347.37   15.10
  -6   1   7  376.46   14.60
   6   2   7  168.58    7.30
  -6   2   7  168.48    7.20
  -6  -2  -7  167.78    7.30
  -6   2   7  168.88    8.20
  -6   2   7  183.08    7.80
   6   3   7   61.49    3.00
  -6   3   7   58.79    3.30
  -6  -3  -7   57.99    3.00
  -6   3   7   60.49    3.80
  -6   3   7   58.39    2.90
   6  -4  -7  169.18    6.90
   6   4   7  169.68    7.30
  -6  -4  -7  172.88    7.40
  -6   4   7  185.08    8.20
  -6   4   7  175.48    7.30
  -6   4   7  164.98    7.30
   6   5   7   45.30    2.30
   6  -5  -7   42.30    2.00
  -6  -5  -7   45.90    2.40
  -6   5   7   43.50    2.80
  -6   5   7   42.80    2.30
  -6   5   7   41.70    2.30
   6  -6  -7   86.69    3.60
   6   6   7   83.89    3.70
  -6   6   7   87.39    4.00
  -6   6   7   87.69    4.00
   6  -7  -7   38.50    1.80
   6   7   7   39.60    1.90
  -6   7   7   42.20    2.20
  -6   7   7   42.60    2.10
   6  -8  -7   54.69    2.40
   6   8   7   53.29    2.40
  -6   8   7   57.99    2.60
  -6   8   7   57.59    2.60
   7  -6   7  221.98    9.10
  -7   6  -7  230.08    9.10
   7  -5   7  285.17   10.60
  -7  -5   7  220.38   10.60
  -7   5  -7  279.97   10.60
   7  -4   7   26.90    1.70
  -7  -4   7   27.50    1.80
  -7   4  -7   28.20    1.60
   7  -3   7   56.79    2.80
  -7  -3   7   52.39    2.80
  -7   3  -7   52.99    2.60
   7  -2   7  394.06   16.20
  -7  -2   7  447.96   16.40
  -7  -2   7  409.26   17.00
  -7  -2   7  376.16   16.40
   7  -1   7   61.09    3.00
  -7   1  -7   61.89    2.90
  -7  -1   7   59.29    3.20
  -7  -1   7   56.39    3.50
   7   0   7   30.70    1.90
  -7   0  -7   30.70    1.90
  -7   0   7   31.70    2.10
  -7   0   7   31.90    2.40
   7   1   7   59.29    3.00
  -7   1   7   64.19    2.90
  -7   1   7   59.49    3.30
  -7  -1  -7   59.69    3.00
  -7   1   7   62.29    3.70
   7   2   7  399.46   16.20
  -7   2   7  422.26   16.10
  -7  -2  -7  423.66   16.30
  -7   2   7  373.36   16.40
  -7   2   7  410.56   17.00
   7   3   7   57.39    2.80
  -7  -3  -7   59.79    2.90
  -7   3   7   57.99    3.30
  -7   3   7   53.79    2.70
   7   4   7   26.90    1.70
  -7  -4  -7   26.30    1.70
  -7   4   7   28.20    2.00
  -7   4   7   31.30    1.70
   7   5   7  276.27   10.90
  -7   5   7  273.97   11.10
  -7  -5  -7  278.17   11.10
  -7   5   7  274.57   11.10
   7   6   7  228.48    9.10
  -7   6   7  237.68    9.30
  -7   6   7  222.68    9.20
   8  -3   7   61.19    2.80
   8  -2   7   12.70    1.00
  -8  -2   7   14.50    1.00
   8  -1   7   20.00    1.30
  -8   1  -7   20.80    1.30
  -8  -1   7   21.40    1.30
   8   0   7    1.70    0.50
  -8   0   7    2.20    0.60
  -8   0  -7    2.00    0.50
  -8   0   7    1.70    0.40
   8   1   7   19.20    1.20
  -8   1   7   23.60    1.40
  -8  -1  -7   22.00    1.30
  -8   1   7   20.30    1.20
  -8  -2  -7   14.00    1.00
  -8   2   7   13.20    0.90
  -8   2   7   12.50    1.00
   8   3   7   64.79    2.80
  -8   3   7   64.59    2.80
  -8   3   7   60.49    2.90
  -8  -3  -7   67.79    2.90
   0 -11   8   46.10    2.50
   0 -11   8   49.99    2.90
   0 -10   8   60.39    3.60
   0 -10   8   60.19    3.20
   0  -9   8   15.10    1.40
   0  -8   8   70.29    3.50
   0   7  -8    8.20    1.10
   0   6  -8  183.68    9.30
   0   5  -8   27.10    2.60
   0   4  -8  181.98    8.80
   0  -4   8  188.68   10.00
   0   3  -8  126.79    6.50
   0  -3   8  134.59    7.70
   0   2  -8 1348.07   52.39
   0  -2   8 1312.57   52.29
   0   1  -8  726.33   27.70
   0  -1   8  642.84   28.00
   0  -1   8  695.53   27.70
   0   0   8  398.06   16.40
   0   0   8  381.86   16.70
   0   1   8  748.53   29.50
   0   1   8  712.53   29.90
   0   2   8 1427.16   56.49
   0   2   8 1404.46   55.79
   0   3   8  127.39    6.30
   0   3   8  121.99    6.90
   0   4   8  187.98    9.60
   0   4   8  184.28    8.80
   0   5   8   23.10    2.30
   0   5   8   20.30    2.60
   0   5   8   17.70    1.40
   0   6   8  188.78    9.90
   0   6   8  173.28    7.70
   0  -7  -8    8.30    1.00
   0   7   8   10.90    1.60
   0   7   8    7.40    1.00
   0   8   8   63.29    3.00
   0  -8  -8   62.59    3.10
   0   9   8   16.30    1.30
   0  -9  -8   15.50    1.40
   0  10   8   58.29    2.80
   0  11   8   47.70    2.20
   1 -11   8   30.90    2.20
  -1 -11   8   30.80    2.40
  -1 -11   8   32.20    2.20
   1 -10   8   21.20    1.90
   1 -10   8   21.30    1.60
  -1  10  -8   22.10    1.50
  -1 -10   8   20.90    1.60
   1  -9   8  261.77   10.60
   1  -9   8  252.87   11.10
  -1   9  -8  243.28   10.30
  -1  -9   8  237.48   10.40
   1  -8   8   98.79    4.60
  -1   8  -8   92.09    4.50
  -1  -8   8   95.19    4.60
   1  -7   8   34.80    2.10
  -1   7  -8   33.30    2.10
   1  -6   8   19.40    3.10
   1   6  -8   23.80    2.70
  -1   6  -8   18.30    2.30
   1   5  -8  206.58    9.90
   1  -5   8  196.48   10.90
  -1   5  -8  193.38    9.60
   1   4  -8  368.46   15.80
   1  -4   8  347.27   17.10
  -1   4  -8  361.86   15.60
   1  -3   8   29.80    3.40
   1   3  -8   27.60    2.40
  -1   3  -8   28.80    2.40
   1   2  -8  207.08    9.30
   1  -2   8  196.38    9.20
  -1   2  -8  206.38    9.30
   1  -1   8  111.59    5.70
  -1   1  -8  115.29    5.60
  -1  -1   8  108.19    6.00
   1   0   8   40.50    3.00
   1   0   8   38.40    2.80
  -1   0   8   37.20    3.10
   1   1   8  114.49    5.90
   1   1   8  114.89    6.20
  -1   1   8  115.09    6.40
   1   2   8  198.88    9.80
   1   2   8  207.68    9.40
  -1   2   8  199.28    9.90
   1   3   8   26.30    2.70
   1   3   8   28.40    2.40
  -1   3   8   30.20    2.90
   1   4   8  374.66   16.40
   1  -4  -8  371.16   17.40
   1   4   8  392.56   17.30
  -1   4   8  386.06   17.20
  -1   4   8  374.26   16.30
   1   5   8  193.98    9.60
   1   5   8  211.38    8.60
   1   5   8  204.28   10.60
   1  -5  -8  198.28   10.70
  -1   5   8  209.48   10.50
  -1   5   8  192.28    9.40
  -1   5   8  192.78    8.50
   1  -6  -8   18.20    2.90
   1   6   8   20.00    2.90
  -1   6   8   17.70    1.50
  -1   6   8   22.20    2.90
   1  -7  -8   33.50    2.00
   1   7   8   32.10    1.90
  -1   7   8   36.10    2.60
  -1   7   8   34.20    1.90
   1  -8  -8   95.49    4.40
   1   8   8   96.19    4.30
  -1   8   8   96.79    4.30
   1   9   8  247.98   10.10
  -1   9   8  251.67   10.20
   1  10   8   23.70    1.40
  -1  10   8   20.60    1.40
  -1  11   8   29.20    1.50
   2 -11   8    7.40    1.00
  -2  11  -8    6.80    0.80
  -2 -11   8    6.50    1.00
   2 -10   8   26.90    2.20
   2 -10   8   25.50    1.80
  -2 -10   8   24.80    1.70
  -2  10  -8   25.00    1.60
   2  -9   8   23.50    1.80
   2  -9   8   22.00    2.10
  -2   9  -8   23.50    1.70
  -2  -9   8   18.30    1.60
   2  -8   8  219.68   10.20
   2  -8   8  219.08    9.60
  -2  -8   8  228.68    9.40
  -2   8  -8  222.58    9.40
   2  -7   8  151.18    6.80
  -2   7  -8  148.09    6.60
   2   6  -8  101.29    6.50
   2  -6   8  101.99    7.30
   2  -6   8  106.59    4.90
  -2   6  -8  107.69    6.20
   2  -5   8  938.41   38.80
   2   5  -8  917.61   37.30
   2  -5   8  886.31   35.50
  -2   5  -8  882.61   36.90
   2   4  -8   57.69    4.00
   2  -4   8   49.00    4.70
  -2   4  -8   49.99    3.60
   2  -3   8 1159.28   47.00
   2   3  -8 1070.89   45.00
  -2   3  -8 1147.59   45.10
   2   2  -8  519.85   22.50
   2  -2   8  545.25   24.40
   2  -2   8  538.85   22.60
  -2  -2   8  580.54   26.80
  -2   2  -8  542.05   22.60
   2  -1   8  713.13   29.90
  -2  -1   8  739.73   33.60
  -2   1  -8  754.22   29.80
   2   0   8   21.30    2.20
  -2   0  -8   20.70    1.90
  -2   0   8   25.90    4.20
   2   1   8  731.83   30.70
   2   1   8  757.22   31.10
  -2   1   8  768.92   31.40
   2   2   8  535.05   23.10
   2   2   8  550.04   23.60
  -2   2   8  567.64   23.80
   2   3   8 1088.39   43.90
   2  -3  -8 1059.59   44.60
   2   3   8 1102.09   44.60
  -2   3   8 1114.69   44.70
   2   4   8   45.30    4.00
   2   4   8   46.80    3.60
   2  -4  -8   56.19    4.40
   2   4   8   45.90    2.70
  -2   4   8   50.89    2.60
  -2   4   8   54.09    4.20
   2  -5  -8  873.91   39.00
   2   5   8  967.90   39.20
   2   5   8  925.21   38.00
  -2   5   8  968.80   38.90
  -2   5   8  929.51   36.60
   2   6   8  106.19    4.90
   2  -6  -8  100.29    7.00
   2   6   8  102.19    7.00
  -2   6   8   98.59    4.90
  -2   6   8  113.69    6.90
  -2   6   8  103.99    5.80
   2  -7  -8  145.09    6.30
   2   7   8  147.59    6.10
  -2   7   8  147.19    6.20
  -2   7   8  137.99    6.90
   2   8   8  217.38    8.70
   2  -8  -8  213.18    8.90
  -2   8   8  215.18    8.80
  -2   8   8  203.68    8.70
   2   9   8   22.60    1.40
  -2   9   8   21.40    1.50
   2  10   8   24.30    1.40
  -2  10   8   27.50    1.60
  -2  11   8    7.10    0.70
   3 -10   8   23.00    1.90
  -3 -10   8   26.30    1.60
  -3  10  -8   25.40    1.50
   3  -9   8  159.38    7.70
  -3   9  -8  164.38    6.90
   3  -8   8    3.10    1.00
  -3  -8   8    3.00    0.80
  -3   8  -8    2.30    0.70
   3  -7   8   36.00    2.40
   3  -7   8   35.40    2.80
  -3   7  -8   32.30    2.10
   3  -6   8  426.56   17.10
   3  -6   8  416.06   17.70
  -3   6  -8  410.26   16.70
  -3   6  -8  407.46   16.60
   3   5  -8   11.10    2.50
   3  -5   8    9.50    2.70
   3  -5   8   11.10    1.30
  -3   5  -8    9.50    1.90
   3   4  -8  476.15   20.60
   3  -4   8  460.95   18.90
   3  -4   8  473.65   22.00
  -3   4  -8  459.65   20.20
   3  -3   8  773.32   33.70
   3   3  -8  779.12   32.10
  -3  -3   8  771.52   37.10
  -3   3  -8  772.92   31.80
   3  -2   8  276.77   12.00
   3  -2   8  285.87   13.10
   3  -2   8  290.37   14.80
  -3   2  -8  297.87   13.20
  -3  -2   8  310.77   17.80
   3  -1   8  898.81   36.40
   3  -1   8  827.02   35.10
   3  -1   8  897.31   38.10
  -3   1  -8  893.41   36.20
  -3  -1   8  956.20   41.40
   3   0   8  287.77   14.80
   3   0   8  303.57   13.70
  -3   0  -8  306.37   13.30
  -3   0   8  303.97   17.40
   3   1   8  847.22   35.30
   3   1   8  857.41   33.90
  -3   1   8  876.01   39.50
   3   2   8  279.97   12.00
   3   2   8  294.27   13.50
   3   2   8  295.97   13.90
  -3   2   8  307.07   14.10
  -3   2   8  274.77   16.60
   3   3   8  752.32   29.40
   3   3   8  737.63   31.70
   3   3   8  753.62   31.00
   3  -3  -8  726.23   31.50
  -3   3   8  782.72   35.00
  -3   3   8  758.62   31.70
  -3   3   8  700.23   29.20
   3   4   8  460.35   21.30
   3  -4  -8  474.65   21.20
   3   4   8  470.85   20.40
  -3   4   8  481.45   21.10
  -3   4   8  457.25   23.80
  -3   4   8  460.65   18.80
   3   5   8    8.40    2.30
   3  -5  -8    9.10    2.40
   3   5   8   12.40    2.20
  -3   5   8    8.70    2.10
  -3   5   8    5.90    3.50
   3   6   8  413.76   16.40
   3  -6  -8  403.26   16.50
  -3   6   8  409.06   16.40
  -3   6   8  401.06   16.80
  -3   6   8  433.16   17.50
   3   7   8   34.80    2.00
   3  -7  -8   34.30    2.10
  -3   7   8   34.70    2.50
  -3   7   8   34.70    2.00
   3   8   8    2.90    0.60
  -3   8   8    1.30    0.60
  -3   8   8    2.80    0.70
   3   9   8  169.88    7.20
  -3   9   8  178.78    7.30
  -3   9   8  179.48    7.40
  -3  10   8   28.20    1.60
   4 -10   8   15.30    1.00
  -4  10  -8   16.30    1.10
   4  -9   8   57.19    2.70
   4  -9   8   57.19    3.30
  -4   9  -8   59.09    2.80
   4  -8   8   49.10    3.20
   4  -8   8   46.10    2.40
   4  -8   8   47.00    2.80
  -4   8  -8   49.60    2.50
  -4   8  -8   42.90    2.30
  -4  -8   8   49.10    2.60
   4  -7   8  314.87   14.60
   4  -7   8  347.77   14.10
   4  -7   8  349.77   13.60
  -4   7  -8  317.27   13.60
  -4   7  -8  331.97   13.50
  -4  -7   8  347.77   13.60
   4  -6   8  509.05   20.80
   4  -6   8  518.15   20.10
   4  -6   8  464.55   19.50
  -4   6  -8  481.75   19.50
  -4   6  -8  478.85   19.60
   4  -5   8  347.17   14.50
   4  -5   8  341.67   14.00
   4  -5   8  358.76   15.20
  -4   5  -8  354.96   14.00
  -4   5  -8  332.17   14.00
   4  -4   8 2161.48   81.09
   4  -4   8 2067.99   80.39
   4  -4   8 2072.19   79.89
  -4   4  -8 1982.60   79.89
  -4   4  -8 2048.50   79.89
   4  -3   8   55.49    5.10
   4  -3   8   48.70    2.90
  -4   3  -8   48.70    3.90
  -4  -3   8   49.50    7.10
   4  -2   8   64.19    5.50
   4  -2   8   57.89    3.30
  -4   2  -8   63.79    4.40
  -4  -2   8   59.09    7.50
   4  -1   8   79.29    4.10
   4  -1   8   77.39    5.20
   4  -1   8   88.59    6.50
  -4  -1   8   80.89    8.50
  -4   1  -8   84.99    5.10
   4   0   8  694.03   30.00
   4   0   8  743.03   28.60
   4   0   8  761.32   36.20
  -4   0  -8  689.03   29.50
  -4   0   8  693.73   34.90
   4   1   8   73.89    3.90
   4   1   8   78.09    5.20
  -4   1   8   82.59    8.30
  -4  -1  -8   83.99    5.00
  -4   1   8   73.89    3.60
   4   2   8   59.79    3.30
   4   2   8   58.89    4.60
  -4   2   8   67.59    5.20
  -4   2   8   74.19    7.80
  -4   2   8   64.39    3.30
   4   3   8   46.20    4.00
   4   3   8   49.20    4.40
  -4   3   8   47.60    2.70
  -4   3   8   50.89    4.50
  -4   3   8   46.40    6.30
   4   4   8 2072.19   80.29
  -4   4   8 2177.08   80.79
  -4   4   8 2136.59   81.39
  -4  -4  -8 2116.89   80.39
  -4   4   8 1892.31   80.19
   4  -5  -8  368.16   14.30
   4   5   8  361.36   14.60
  -4   5   8  350.56   14.60
  -4   5   8  380.66   15.70
  -4  -5  -8  350.96   14.70
  -4   5   8  373.06   15.10
   4  -6  -8  497.35   19.90
   4   6   8  491.25   19.80
   4  -6  -8  509.55   19.60
  -4   6   8  497.65   19.90
  -4   6   8  499.25   20.80
  -4   6   8  516.15   20.00
   4   7   8  344.77   14.10
   4  -7  -8  356.16   13.90
  -4   7   8  346.47   14.20
  -4   7   8  347.97   14.20
  -4   7   8  370.06   15.20
   4   8   8   54.39    2.60
   4  -8  -8   56.29    2.50
  -4   8   8   57.59    2.80
  -4   8   8   52.89    2.70
   4  -9  -8   65.39    2.90
  -4   9   8   66.79    3.10
  -4   9   8   68.89    3.10
   4  10   8   16.30    0.90
   4 -10  -8   16.90    0.90
  -4  10   8   15.40    1.00
  -4  10   8   16.20    1.00
   5  -9   8   79.79    3.40
  -5   9  -8   76.49    3.40
   5  -8   8  184.68    8.30
   5  -8   8  186.88    7.60
  -5   8  -8  181.68    7.50
  -5  -8   8  186.38    7.70
  -5   8  -8  175.38    7.50
   5  -7   8    7.70    1.00
   5  -7   8    7.60    1.30
  -5   7  -8    7.70    0.90
  -5  -7   8    7.30    1.00
  -5   7  -8    9.00    0.90
   5  -6   8  127.99    5.50
   5  -6   8  125.49    6.40
  -5   6  -8  128.69    5.50
  -5  -6   8  120.89    5.50
   5  -5   8   86.69    4.60
   5  -5   8   83.19    4.20
   5  -5   8   92.59    5.10
  -5   5  -8   91.19    4.20
  -5  -5   8   95.89    4.20
   5  -4   8  152.28    6.60
   5  -4   8  155.18    7.60
   5  -4   8  152.48    7.10
  -5  -4   8  148.79    6.60
  -5   4  -8  154.98    6.60
   5  -3   8  169.38    8.10
   5  -3   8  159.38    7.00
   5  -3   8  159.98    7.50
  -5   3  -8  166.38    7.00
   5  -2   8  207.38    9.50
   5  -2   8  208.98    8.50
   5  -2   8  198.48    9.00
  -5  -2   8  202.08    8.60
  -5   2  -8  198.28    8.40
   5  -1   8  266.57   10.90
   5  -1   8  236.18   11.30
   5  -1   8  274.57   12.00
  -5  -1   8  275.07   11.00
  -5   1  -8  257.37   10.80
  -5   1  -8  272.97   10.80
   5   0   8  386.96   15.30
   5   0   8  389.66   16.40
  -5   0  -8  366.96   15.20
  -5   0   8  372.36   15.40
   5   1   8  280.27   12.50
   5   1   8  276.77   11.30
  -5   1   8  268.97   11.50
  -5  -1  -8  270.77   11.20
   5   2   8  209.48    8.50
  -5   2   8  201.78    8.80
  -5   2   8  194.88    9.70
  -5  -2  -8  205.18    8.50
   5   3   8  172.18    7.30
  -5   3   8  178.78    7.70
  -5   3   8  170.98    8.20
  -5   3   8  168.88    7.20
  -5  -3  -8  161.78    7.30
   5   4   8  154.58    6.60
  -5   4   8  155.88    6.60
  -5   4   8  155.38    7.00
  -5   4   8  150.28    7.50
  -5  -4  -8  152.48    6.60
  -5   4   8  152.78    6.60
   5  -5  -8   86.49    3.80
   5   5   8   89.69    4.20
  -5   5   8   90.39    4.90
  -5   5   8   89.09    4.50
  -5  -5  -8   99.99    4.30
  -5   5   8   91.79    4.20
  -5   5   8   93.49    4.20
   5   6   8  132.69    5.60
   5  -6  -8  132.19    5.40
  -5   6   8  131.59    6.30
  -5   6   8  129.19    5.70
  -5   6   8  129.19    5.70
   5   7   8    7.60    0.90
   5  -7  -8    8.00    0.70
  -5   7   8    8.50    1.00
  -5   7   8    8.20    1.00
   5  -8  -8  201.48    8.30
  -5   8   8  209.98    8.60
  -5   8   8  221.38    8.60
   5  -9  -8   82.89    3.50
   5   9   8   81.89    3.50
  -5   9   8   86.59    3.70
  -5   9   8   89.89    3.70
   6  -7   8  208.68    8.20
  -6   7  -8  208.58    8.10
  -6  -7   8  182.68    8.30
   6  -6   8   12.10    1.10
  -6   6  -8   13.00    1.10
  -6  -6   8   12.00    1.10
   6  -5   8   30.70    1.80
  -6   5  -8   29.80    1.80
  -6  -5   8   29.00    1.80
   6  -4   8   86.69    4.00
  -6  -4   8   89.69    4.10
  -6   4  -8   81.39    3.90
   6  -3   8   74.19    3.50
  -6   3  -8   68.39    3.40
  -6  -3   8   70.29    3.60
   6  -2   8  175.18    7.70
  -6  -2   8  188.88    8.00
  -6   2  -8  183.28    7.70
   6  -1   8  199.38    8.40
  -6   1  -8  197.08    8.30
  -6  -1   8  208.78    8.60
  -6   1  -8  185.98    8.20
   6   0   8   66.99    3.20
  -6   0   8   62.99    3.40
  -6   0  -8   64.19    3.20
  -6   0   8   60.89    3.80
   6   1   8  208.68    8.80
  -6   1   8  209.48    9.60
  -6   1   8  217.18    9.20
  -6  -1  -8  203.38    8.80
   6   2   8  188.68    7.90
  -6   2   8  186.88    8.80
  -6   2   8  191.28    8.30
  -6  -2  -8  187.18    8.00
   6   3   8   70.19    3.50
  -6  -3  -8   71.39    3.50
  -6   3   8   74.49    3.40
  -6   3   8   74.99    4.30
  -6   3   8   76.39    3.90
   6   4   8   91.49    4.10
  -6   4   8   92.99    4.10
  -6   4   8   88.69    4.10
  -6  -4  -8   87.29    4.10
  -6   4   8   90.69    4.80
  -6   4   8   83.99    4.40
   6   5   8   31.40    1.80
  -6   5   8   29.10    1.80
  -6   5   8   29.60    1.80
  -6   5   8   29.50    2.20
  -6  -5  -8   31.40    1.80
   6   6   8   12.60    1.00
  -6   6   8   11.60    1.00
  -6   6   8   12.40    1.10
  -6   7   8  228.88    9.30
  -6   7   8  230.48    9.30
   7  -5   8  149.79    6.10
  -7   5  -8  144.19    6.10
   7  -4   8   42.50    2.10
  -7   4  -8   39.20    2.00
  -7  -4   8   37.50    2.10
   7  -3   8  219.08    8.70
  -7   3  -8  210.08    8.60
  -7  -3   8  202.18    8.80
   7  -2   8  148.09    6.40
  -7  -2   8  144.99    6.50
  -7   2  -8  147.89    6.40
  -7  -2   8  159.08    6.40
  -7  -2   8  148.99    7.00
   7  -1   8   37.00    2.10
  -7   1  -8   36.80    2.00
  -7  -1   8   38.30    2.60
  -7  -1   8   35.10    2.20
  -7   0   8    7.90    1.20
  -7   0  -8    9.00    1.00
  -7   0   8    7.70    1.10
   7   1   8   38.40    2.10
  -7   1   8   39.00    2.60
  -7  -1  -8   40.70    2.20
  -7   1   8   37.00    2.30
   7   2   8  153.98    6.40
  -7   2   8  144.99    6.70
  -7   2   8  147.49    6.30
  -7   2   8  155.08    7.10
  -7  -2  -8  162.78    6.50
   7   3   8  217.48    8.90
  -7   3   8  208.68    8.80
  -7   3   8  220.18    9.50
  -7  -3  -8  225.78    9.00
   7   4   8   39.20    2.00
  -7   4   8   43.00    2.40
  -7   4   8   40.10    2.00
  -7  -4  -8   41.20    2.10
  -7  -5  -8  141.59    5.70
  -7   5   8  119.09    5.90
  -7   5   8  146.09    5.60
  -7   5   8  134.09    5.90
   8  -2   8  449.06   17.60
   8  -1   8   51.69    2.40
  -8  -1   8   52.79    2.40
  -8   1  -8   48.80    2.30
   8   0   8   36.30    1.80
  -8   0   8   37.80    1.90
   8   1   8   52.29    2.40
  -8  -1  -8   51.89    2.50
  -8   1   8   54.59    2.50
   8   2   8  440.16   17.70
  -8  -2  -8  458.65   17.80
  -8   2   8  423.96   17.60
  -8   2   8  489.65   17.90
   0 -11   9   96.69    4.60
   0 -10   9   67.59    3.30
   0 -10   9   65.99    3.70
   0  -9   9  163.18    7.10
   0  -8   9   57.29    3.00
   0   7  -9   90.69    4.20
   0   6  -9  241.38   10.40
   0   5  -9   89.99    5.50
   0   4  -9   66.09    4.30
   0  -4   9   66.19    5.30
   0   3  -9  281.77   12.70
   0  -3   9  287.07   14.30
   0   2  -9  299.27   13.00
   0  -1   9   77.19    4.40
   0   0   9    0.10    0.70
   0   0   9    0.60    0.70
   0   1   9   80.99    5.00
   0   1   9   81.29    4.70
   0   2   9  313.17   14.30
   0   2   9  341.47   15.10
   0   3   9  300.17   13.90
   0   3   9  285.97   13.10
   0   4   9   68.59    3.40
   0   4   9   74.19    5.20
   0   4   9   64.59    4.30
   0   5   9   89.39    5.40
   0   5   9   95.99    6.30
   0  -6  -9  227.48    9.40
   0   6   9  221.98    9.30
   0   6   9  252.17   11.10
   0   6   9  216.18    9.70
   0   7   9  106.79    5.40
   0  -7  -9   90.09    4.40
   0   7   9   96.99    4.40
   0   8   9   56.79    2.80
   0  -8  -9   57.99    2.90
   0  -9  -9  180.18    7.40
   0   9   9  172.28    7.30
   0  10   9   69.19    3.10
   0  11   9   91.09    3.80
   1 -11   9    4.10    0.90
  -1 -11   9    4.10    0.80
   1 -10   9   76.69    3.70
   1 -10   9   73.79    4.10
  -1  10  -9   78.29    3.50
  -1 -10   9   78.79    3.70
   1  -9   9   18.00    1.80
   1  -9   9   20.60    1.60
  -1   9  -9   19.90    1.40
  -1  -9   9   19.60    1.50
   1  -8   9  116.09    5.40
  -1   8  -9  117.89    5.30
   1  -7   9  104.29    4.90
  -1   7  -9  107.09    4.90
  -1   6  -9  864.71   33.90
   1  -5   9  173.18   10.30
   1   5  -9  178.68    9.20
  -1   5  -9  181.68    9.00
   1  -4   9  380.96   18.40
   1   4  -9  379.96   16.70
  -1   4  -9  377.36   16.60
   1   3  -9   91.09    5.30
   1  -3   9  100.89    6.90
  -1   3  -9   91.79    5.30
   1  -2   9   33.20    3.70
  -1   2  -9   27.80    2.40
   1  -1   9    4.30    1.10
  -1  -1   9    4.70    1.20
  -1  -1   9    3.80    1.30
   1   0   9 1906.41   75.19
  -1   0   9 1921.11   75.79
   1   1   9    4.70    1.30
  -1   1   9    5.50    1.50
   1   2   9   30.40    2.90
   1   2   9   27.60    2.60
  -1   2   9   27.80    2.90
  -1   2   9   28.70    2.60
   1   3   9   95.39    5.40
   1   3   9   92.49    5.80
  -1   3   9   85.99    4.20
  -1   3   9  100.09    5.40
  -1   3   9   89.19    5.80
   1   4   9  391.96   15.70
   1   4   9  359.66   16.90
   1   4   9  374.56   17.70
  -1   4   9  399.06   15.70
  -1   4   9  404.56   16.90
  -1   4   9  390.66   17.80
   1   5   9  189.18    8.00
   1   5   9  185.08    9.20
   1   5   9  194.78   10.20
  -1   5   9  174.48    8.90
  -1   5   9  178.08    9.90
  -1   5   9  171.08    7.80
   1  -6  -9  840.72   34.50
   1   6   9  972.10   36.30
   1   6   9  848.72   34.40
  -1   6   9  819.72   34.80
  -1   6   9 1013.30   36.20
  -1  -6  -9  836.52   34.50
  -1   6   9  857.91   34.40
   1   7   9  100.69    4.50
   1  -7  -9  100.59    4.60
  -1   7   9   96.99    4.50
  -1   7   9  108.89    5.40
   1   8   9  119.79    5.20
   1  -8  -9  122.29    5.30
  -1   8   9  118.49    5.20
   1   9   9   18.50    1.30
   1  -9  -9   21.30    1.50
  -1   9   9   20.60    1.40
   1  10   9   83.69    3.70
  -1  10   9   87.89    3.80
   1  11   9    3.90    0.50
  -1  11   9    3.70    0.50
   2 -10   9   18.10    1.70
  -2  10  -9   18.20    1.20
  -2 -10   9   19.50    1.40
   2  -9   9   34.90    2.20
   2  -9   9   31.70    2.40
  -2  -9   9   29.70    1.90
  -2   9  -9   32.00    1.90
   2  -8   9   28.70    2.40
   2  -8   9   28.80    2.00
  -2   8  -9   30.10    1.90
   2  -7   9   16.50    1.50
   2  -6   9  114.09    5.20
  -2   6  -9  109.69    5.10
   2  -5   9 2769.12  108.59
   2   5  -9 2766.72  106.99
   2  -5   9 2711.93  104.89
  -2   5  -9 2619.34  106.49
   2   4  -9  101.79    6.00
   2  -4   9  100.19    7.30
  -2   4  -9   96.59    5.80
   2   3  -9  480.95   20.90
   2  -3   9  485.25   22.80
  -2   3  -9  499.15   20.80
   2  -2   9  327.87   16.60
  -2   2  -9  335.57   14.60
   2  -1   9  220.18   10.30
  -2  -1   9  213.88   10.70
  -2   1  -9  215.68   10.00
   2   0   9   73.69    4.60
  -2   0   9   74.49    5.10
   2   1   9  201.38   11.50
   2   1   9  197.18    9.80
   2   1   9  215.38   10.20
  -2   1   9  227.18   10.90
   2   2   9  304.37   13.00
   2   2   9  323.07   14.40
   2   2   9  324.97   14.90
  -2   2   9  318.67   15.00
   2   3   9  483.45   21.30
   2   3   9  491.65   22.00
  -2   3   9  484.75   19.80
  -2   3   9  529.35   22.20
   2   4   9   98.19    6.50
   2   4   9   94.79    4.70
   2   4   9  102.49    6.00
  -2   4   9  110.99    6.70
  -2   4   9  100.09    4.70
   2   5   9 3003.30  109.29
   2   5   9 2743.43  111.89
   2   5   9 2738.53  110.79
  -2   5   9 2895.51  110.49
  -2   5   9 2692.43  109.09
  -2   5   9 2872.61  111.69
   2  -6  -9  115.59    5.10
   2   6   9  109.49    4.90
   2   6   9   98.69    6.10
  -2   6   9  125.79    6.00
  -2   6   9  113.49    4.90
  -2   6   9  112.29    5.30
   2  -7  -9   16.10    1.40
   2   7   9   17.60    1.30
  -2   7   9   16.40    1.80
  -2   7   9   17.50    1.30
   2  -8  -9   28.70    1.90
   2   8   9   30.40    1.80
  -2   8   9   29.40    1.80
  -2   8   9   29.30    1.80
   2   9   9   34.80    1.90
  -2   9   9   34.80    1.90
   2  10   9   19.70    1.20
  -2  10   9   19.90    1.20
   3 -10   9   30.70    2.10
  -3  10  -9   36.90    1.80
   3  -9   9  256.07   11.50
   3  -9   9  258.87   11.10
  -3   9  -9  279.57   10.80
   3  -8   9    9.50    1.50
  -3   8  -9    8.80    1.10
  -3  -8   9    7.30    1.00
   3  -7   9   47.10    3.30
  -3   7  -9   48.30    2.60
   3  -6   9   76.29    4.40
   3  -6   9   66.59    3.80
  -3   6  -9   70.09    3.40
  -3   6  -9   74.89    3.60
  -3   5  -9   62.19    3.10
  -3   5  -9   62.49    3.20
   3   4  -9   61.19    4.60
   3  -4   9   55.79    5.40
  -3   4  -9   56.59    3.10
  -3  -4   9   54.09    7.20
  -3   4  -9   56.49    4.20
   3  -3   9  111.09    5.30
   3  -3   9  114.59    8.00
  -3  -3   9  126.39   10.60
  -3   3  -9  112.69    6.50
   3  -2   9   86.99    6.70
   3  -2   9   81.19    4.10
  -3  -2   9   88.89    8.60
  -3   2  -9   82.99    5.10
   3  -1   9   97.09    4.60
   3  -1   9   96.49    5.80
   3  -1   9   99.29    7.20
  -3  -1   9   96.69    8.80
  -3   1  -9   94.39    5.50
   3   0   9   18.60    1.60
   3   0   9   21.20    2.50
   3   0   9   24.40    3.40
  -3   0   9   22.00    6.40
   3   1   9   93.69    5.90
   3   1   9  101.89    4.80
  -3   1   9   96.59    6.40
   3   2   9   88.79    4.20
   3   2   9   82.89    5.80
   3   2   9   91.89    5.70
  -3   2   9   81.59    5.90
  -3   2   9   80.09    3.90
   3   3   9  109.99    6.70
   3   3   9  111.69    5.30
   3   3   9  123.99    7.50
  -3   3   9  110.89    5.20
  -3   3   9  117.89    7.30
   3   4   9   61.19    4.60
   3   4   9   61.59    3.30
   3   4   9   63.39    5.20
   3   4   9   59.69    3.30
   3   4   9   70.59    4.60
  -3  -4  -9   61.39    3.60
  -3   4   9   55.29    3.20
  -3   4   9   63.19    5.10
   3   5   9   61.69    3.00
   3  -5  -9   60.69    3.10
  -3   5   9   56.79    2.90
  -3   5   9   66.09    3.90
  -3   5   9   62.59    3.40
  -3  -5  -9   62.49    3.10
   3   6   9   77.39    3.50
   3  -6  -9   74.29    3.60
  -3   6   9   74.09    3.90
  -3   6   9   74.49    4.30
  -3   6   9   77.49    3.60
   3   7   9   50.79    2.50
   3  -7  -9   49.80    2.70
  -3   7   9   51.19    2.60
  -3   7   9   49.60    3.20
   3   8   9   10.20    1.00
  -3   8   9    7.10    0.90
  -3   8   9    8.50    1.00
   3   9   9  270.47   11.30
  -3   9   9  292.07   11.40
  -3   9   9  290.47   11.40
   3 -10  -9   36.90    1.70
   3  10   9   38.40    1.80
  -3  10   9   37.50    1.90
   4  -9   9   72.59    3.80
  -4   9  -9   74.49    3.30
   4  -8   9  139.79    5.90
   4  -8   9  138.49    6.30
   4  -8   9  145.89    6.80
  -4  -8   9  136.89    6.10
  -4   8  -9  142.89    6.00
   4  -7   9   27.30    1.70
   4  -7   9   28.20    2.40
   4  -7   9   28.70    2.10
  -4   7  -9   28.20    1.80
  -4   7  -9   28.50    1.70
  -4  -7   9   28.30    1.80
   4  -6   9  707.13   27.90
   4  -6   9  703.63   29.10
   4  -6   9  747.73   28.60
  -4   6  -9  701.63   28.00
  -4   6  -9  700.03   28.00
   4  -5   9  209.18    8.90
   4  -5   9  194.68    8.30
   4  -5   9  204.68    9.40
  -4   5  -9  195.58    8.30
  -4   5  -9  185.58    8.30
   4  -4   9  142.69    6.00
   4  -4   9  145.19    6.60
   4  -4   9  141.09    7.10
  -4   4  -9  129.29    6.00
  -4   4  -9  136.89    6.00
   4  -3   9   79.19    4.10
   4  -3   9   80.29    4.70
   4  -3   9   79.59    3.70
  -4   3  -9   75.49    3.70
   4  -2   9   76.19    4.40
   4  -2   9   77.89    8.00
   4  -2   9   71.49    3.80
   4  -2   9   67.39    3.40
  -4   2  -9   68.29    3.40
  -4  -2   9   63.89    8.10
   4  -1   9   47.90    4.90
   4  -1   9   45.70    2.80
   4  -1   9   47.20    3.90
  -4  -1   9   43.60    6.50
  -4   1  -9   46.20    3.70
   4   0   9  596.74   23.20
   4   0   9  628.54   28.20
   4   0   9  560.64   24.70
  -4   0   9  576.74   29.90
  -4   0  -9  504.75   23.90
   4   1   9   46.20    2.70
   4   1   9   43.50    3.80
   4   1   9   42.50    3.80
  -4   1   9   42.20    6.30
  -4   1   9   42.50    2.40
  -4   1   9   42.90    4.20
   4   2   9   75.19    3.50
   4   2   9   73.39    4.60
  -4   2   9   70.39    3.60
  -4  -2  -9   70.39    3.50
  -4   2   9   69.09    7.90
   4   3   9   76.69    3.80
   4   3   9   93.99    5.40
  -4  -3  -9   76.09    3.90
  -4   3   9   80.49    4.10
   4   4   9  170.98    8.10
   4   4   9  147.79    6.50
  -4   4   9  145.09    6.90
  -4   4   9  148.59    7.40
   4   5   9  200.68    8.60
  -4   5   9  217.88    9.60
  -4   5   9  213.58    9.00
  -4   5   9  200.38    8.50
  -4  -5  -9  200.48    8.70
   4  -6  -9  719.83   28.70
   4   6   9  723.33   28.70
   4  -6  -9  713.03   28.40
  -4   6   9  761.22   28.80
  -4   6   9  729.53   28.80
  -4   6   9  753.92   29.70
   4   7   9   29.30    1.80
   4  -7  -9   29.80    1.50
  -4   7   9   30.00    1.80
  -4   7   9   30.40    1.80
  -4   7   9   33.80    2.20
   4  -8  -9  152.78    6.20
   4   8   9  152.38    6.40
  -4   8   9  159.18    6.60
  -4   8   9  158.78    6.50
   4   9   9   80.29    3.50
   4  -9  -9   80.09    3.40
  -4   9   9   81.89    3.60
  -4   9   9   87.29    3.70
   5  -8   9   48.10    2.30
  -5   8  -9   49.99    2.30
  -5   8  -9   47.10    2.30
   5  -7   9    2.60    0.80
   5  -7   9    2.40    0.60
  -5   7  -9    2.70    0.60
  -5   7  -9    2.60    0.60
  -5  -7   9    2.70    0.70
   5  -6   9  107.79    5.60
   5  -6   9  112.99    4.80
  -5   6  -9  109.99    4.80
  -5   6  -9  104.69    5.20
   5  -5   9  207.08    8.60
   5  -5   9  193.58    9.50
   5  -5   9  200.18    9.00
  -5   5  -9  221.68    8.60
  -5  -5   9  210.08    8.60
   5  -4   9  108.19    4.90
   5  -4   9  107.39    5.30
   5  -4   9  109.89    5.80
  -5   4  -9  108.39    4.80
   5  -3   9   60.89    4.00
   5  -3   9   63.19    3.10
   5  -3   9   60.19    3.50
  -5   3  -9   68.69    3.20
   5  -2   9  115.79    6.10
   5  -2   9  114.89    5.10
   5  -2   9  110.49    5.50
  -5   2  -9  114.69    5.10
   5  -1   9  295.07   11.80
   5  -1   9  283.67   12.80
   5  -1   9  273.47   12.10
  -5   1  -9  287.07   11.70
  -5   1  -9  292.97   11.70
  -5  -1   9  291.17   11.90
   5   0   9  774.52   29.80
   5   0   9  707.53   28.40
  -5   0  -9  714.53   28.40
  -5   0  -9  719.63   28.40
  -5   0   9  697.93   28.60
   5   1   9  310.07   12.60
   5   1   9  336.97   14.00
  -5   1   9  293.07   12.80
  -5  -1  -9  298.67   12.60
   5   2   9  145.89    7.00
   5   2   9  124.69    5.50
  -5   2   9  120.49    5.80
  -5   2   9  121.39    7.60
  -5  -2  -9  117.19    5.50
   5   3   9   66.69    3.30
  -5  -3  -9   65.39    3.30
  -5   3   9   69.29    3.60
  -5   3   9   66.09    4.00
  -5   3   9   61.19    3.20
   5   4   9  113.39    5.00
  -5   4   9  114.59    5.40
  -5  -4  -9  109.09    5.00
  -5   4   9  110.29    4.90
  -5   4   9  113.39    5.90
  -5   4   9  114.19    5.00
   5   5   9  220.08    8.90
  -5  -5  -9  205.18    8.90
  -5   5   9  215.68    8.90
  -5   5   9  217.28    8.90
  -5   5   9  212.78    9.30
  -5   5   9  220.38    9.70
   5   6   9  121.59    5.10
  -5   6   9  120.59    5.20
  -5   6   9  119.69    5.80
  -5   6   9  116.69    5.20
  -5  -6  -9  117.39    5.20
   5   7   9    2.80    0.60
  -5   7   9    2.90    0.60
  -5   7   9    2.70    0.60
   5   8   9   53.69    2.50
  -5   8   9   57.29    2.70
  -5   8   9   60.29    2.70
   6  -7   9  156.08    6.40
  -6   7  -9  156.58    6.40
   6  -6   9   13.40    1.10
  -6   6  -9   16.10    1.10
  -6  -6   9   12.90    1.10
   6  -5   9  214.58    9.10
  -6   5  -9  223.28    9.10
  -6  -5   9  229.88    9.20
   6  -4   9  191.98    7.90
  -6   4  -9  190.58    7.80
  -6  -4   9  182.08    7.90
   6  -3   9  255.17   10.40
  -6  -3   9  243.98   10.50
  -6   3  -9  259.07   10.30
   6  -2   9   12.70    1.20
  -6  -2   9   12.00    1.20
  -6   2  -9   12.80    1.10
   6  -1   9  107.49    4.80
  -6  -1   9  104.29    5.00
  -6   1  -9  106.09    4.80
  -6   1  -9  110.79    4.80
   6   0   9  189.78    7.60
  -6   0   9  169.98    8.30
  -6   0  -9  180.78    7.60
  -6   0   9  180.88    7.90
   6   1   9  111.79    5.00
  -6   1   9  105.59    5.70
  -6   1   9  111.49    5.30
  -6  -1  -9  115.79    5.00
   6   2   9   15.40    1.30
  -6   2   9   13.20    1.60
  -6  -2  -9   12.60    1.20
  -6   2   9   14.10    1.40
   6   3   9  275.67   11.10
  -6   3   9  268.67   11.50
  -6   3   9  276.07   12.00
  -6  -3  -9  271.27   11.20
   6   4   9  204.88    8.20
  -6   4   9  202.28    8.20
  -6   4   9  208.28    9.00
  -6  -4  -9  194.98    8.30
  -6   4   9  190.48    8.50
  -6   4   9  193.18    8.20
   6   5   9  230.88    9.10
  -6  -5  -9  215.68    9.10
  -6   5   9  227.38    9.10
  -6   5   9  219.38    9.10
  -6   5   9  225.68    9.70
   6   6   9   14.90    1.00
  -6   6   9   15.00    1.00
  -6   6   9   13.20    1.10
  -6   7   9  179.68    7.20
  -6   7   9  177.98    7.30
   7  -5   9   24.10    1.40
  -7   5  -9   25.60    1.40
   7  -4   9   88.69    3.90
  -7   4  -9   88.49    3.80
   7  -3   9   87.89    3.90
  -7   3  -9   86.49    3.80
   7  -2   9  279.87   10.60
  -7  -2   9  268.27   10.70
  -7   2  -9  256.77   10.50
  -7  -2   9  240.68   10.70
  -7  -2   9  265.67   11.20
   7  -1   9    5.80    0.80
  -7   1  -9    3.90    0.60
  -7  -1   9    4.30    0.80
  -7  -1   9    3.40    0.80
   7   0   9   20.30    1.40
  -7   0   9   21.20    1.80
  -7   0  -9   18.80    1.30
  -7   0   9   19.80    1.50
   7   1   9    5.10    0.70
  -7   1   9    4.30    1.00
  -7   1   9    3.40    0.80
  -7  -1  -9    4.40    0.70
   7   2   9  283.07   11.00
  -7  -2  -9  291.47   11.10
  -7   2   9  283.17   11.70
  -7   2   9  241.78   11.20
   7   3   9   86.69    3.70
  -7   3   9   86.59    4.20
  -7   3   9   68.59    3.70
  -7  -3  -9   87.89    3.70
   7   4   9   84.49    3.70
  -7   4   9   87.09    4.10
  -7   4   9   86.29    3.70
  -7  -4  -9   91.29    3.80
   7   5   9   22.40    1.30
  -7  -5  -9   25.00    1.30
  -7   5   9   28.40    1.30
  -7   5   9   20.90    1.50
   0 -10  10  140.49    6.40
   0 -10  10  141.49    6.20
   0  -9  10    2.00    0.60
   0  -8  10  213.78    9.00
   0   7 -10  170.08    7.20
   0   6 -10   56.19    2.90
   0   5 -10    6.60    1.00
   0   4 -10  278.47   12.90
   0   3 -10   10.60    1.90
   0  -3  10   11.80    2.80
   0  -1  10  189.78    9.10
   0   0  10  365.76   16.60
   0   0  10  372.86   16.10
   0   1  10  215.58   10.30
   0   1  10  219.48   10.80
   0   2  10   14.20    2.00
   0   2  10   14.90    2.40
   0   3  10    6.60    1.80
   0   3  10    8.80    1.80
   0   3  10    8.20    1.00
   0   4  10  269.17   12.80
   0   4  10  280.97   13.70
   0   4  10  281.07   11.60
   0  -5 -10    4.20    0.80
   0   5  10    6.20    1.00
   0   5  10    5.70    1.60
   0  -5 -10    3.80    0.90
   0   5  10    3.50    0.70
   0  -6 -10   59.09    2.90
   0   6  10   56.89    3.10
   0   6  10   61.99    4.30
   0   6  10   54.09    2.80
   0  -7 -10  178.18    7.60
   0   7  10  182.18    8.40
   0   7  10  180.18    7.50
   0  -8 -10  216.88    9.10
   0   8  10  226.78    9.10
   0   9  10    2.30    0.60
   0  -9 -10    3.00    0.70
   0  10  10  159.08    6.50
   1 -10  10   56.09    3.20
  -1  10 -10   57.49    2.60
  -1 -10  10   57.89    3.10
   1  -9  10    1.30    0.60
   1  -9  10    1.70    0.60
  -1  -9  10    2.00    0.60
  -1   9 -10    1.80    0.50
   1  -8  10   18.50    1.50
  -1   8 -10   18.70    1.40
   1  -7  10   88.79    4.20
  -1   7 -10   90.59    4.20
  -1   6 -10  437.56   17.50
  -1   5 -10  505.75   20.10
   1   4 -10 1513.65   60.19
   1  -4  10 1495.15   62.19
  -1   4 -10 1509.95   59.99
   1  -3  10   64.69    5.70
  -1   3 -10   61.69    4.10
   1  -2  10  566.74   25.20
  -1   2 -10  524.35   22.70
   1  -1  10  161.58    8.00
  -1  -1  10  155.58    7.80
   1   0  10  293.17   13.40
  -1   0  10  296.57   13.20
  -1   0  10  293.47   13.80
   1   1  10  163.48    8.40
   1   1  10  152.18    8.50
  -1   1  10  170.68    8.30
  -1   1  10  174.78    8.90
   1   2  10  546.75   22.60
   1   2  10  575.64   24.10
   1   2  10  570.34   24.60
  -1   2  10  569.84   24.70
  -1   2  10  581.44   24.00
   1   3  10   62.79    4.80
   1   3  10   64.79    4.50
   1   3  10   65.89    3.30
  -1   3  10   67.19    5.00
  -1   3  10   59.59    3.20
  -1   3  10   67.29    4.40
   1   4  10 1613.14   63.79
   1   4  10 1542.05   61.29
   1   4  10 1566.64   62.79
  -1   4  10 1659.13   63.99
  -1   4  10 1457.55   61.19
  -1   4  10 1613.24   62.69
   1  -5 -10  552.54   21.80
   1  -5 -10  540.55   22.00
   1   5  10  537.25   21.70
  -1   5  10  603.24   23.70
  -1   5  10  536.65   21.70
  -1  -5 -10  519.05   21.80
  -1   5  10  586.14   22.20
  -1  -5 -10  546.55   21.90
   1  -6 -10  444.26   17.40
   1   6  10  440.66   17.30
   1   6  10  386.66   18.70
  -1  -6 -10  435.46   17.30
  -1   6  10  458.75   17.70
  -1   6  10  447.66   17.30
   1  -7 -10   86.29    4.20
   1   7  10   94.89    4.10
   1   7  10  100.19    5.20
  -1  -7 -10   89.59    4.10
  -1   7  10   86.09    4.10
  -1   7  10   90.19    4.80
   1  -8 -10   20.70    1.50
   1   8  10   20.80    1.40
  -1   8  10   21.10    1.40
   1   9  10    1.80    0.50
  -1   9  10    3.00    0.60
   1  10  10   61.19    2.80
  -1  10  10   64.49    2.80
   2 -10  10    9.50    1.10
  -2  10 -10   11.60    0.90
   2  -9  10   28.20    2.20
  -2  -9  10   25.60    1.60
  -2   9 -10   29.70    1.70
   2  -8  10    9.50    1.40
   2  -8  10   10.50    1.20
  -2   8 -10   10.60    1.10
   2  -7  10  470.75   18.90
  -2   7 -10  461.75   18.60
   2  -6  10  129.99    5.90
  -2   6 -10  126.89    5.70
   2  -5  10  596.84   22.50
  -2   5 -10  509.35   22.20
  -2   5 -10  579.24   22.30
   2  -4  10  193.58   13.00
   2   4 -10  164.18    9.00
  -2   4 -10  170.38    7.30
  -2   4 -10  188.38   10.70
  -2   4 -10  164.78    7.30
   2  -3  10 1047.60   44.70
  -2   3 -10 1040.70   42.30
   2  -2  10  103.39    7.70
  -2   2 -10  111.99    6.10
   2  -1  10  195.48    8.30
   2  -1  10  206.28   11.60
   2  -1  10  199.08    9.70
  -2  -1  10  181.68   10.00
   2   0  10  271.37   11.20
   2   0  10  277.77   12.70
  -2   0  10  257.67   13.10
   2   1  10  215.58    8.70
   2   1  10  195.78   10.00
  -2   1  10  190.78   10.50
   2   2  10  103.89    6.50
   2   2  10  103.39    6.20
   2   2  10   99.99    4.80
  -2   2  10  104.09    6.70
   2   3  10  977.70   39.10
   2   3  10 1009.80   40.90
   2   3  10  979.50   41.40
  -2   3  10  988.80   39.00
  -2   3  10 1027.30   41.60
   2  -4 -10  176.78    7.40
   2   4  10  168.68   10.70
   2   4  10  176.18   11.00
   2  -4 -10  173.68    7.60
   2   4  10  172.78    7.30
   2   4  10  183.98    7.80
  -2   4  10  168.08    7.60
  -2   4  10  173.48   11.50
  -2  -4 -10  176.08    7.50
   2   5  10  573.54   24.00
   2  -5 -10  605.84   24.30
   2  -5 -10  616.14   24.10
   2   5  10  595.44   24.50
  -2   5  10  587.94   24.00
  -2   5  10  635.84   24.50
  -2  -5 -10  582.54   24.20
  -2   5  10  693.83   25.80
   2  -6 -10  140.99    6.10
   2   6  10  133.69    6.00
  -2  -6 -10  126.29    6.10
  -2   6  10  148.99    6.50
  -2   6  10  150.28    7.10
  -2   6  10  142.49    6.00
   2  -7 -10  456.45   17.70
   2   7  10  460.25   17.60
  -2   7  10  394.86   18.30
  -2   7  10  462.05   17.60
   2   8  10   11.50    1.10
   2  -8 -10   12.50    1.20
  -2   8  10   11.50    1.00
  -2   8  10   11.00    1.10
   2   9  10   34.40    1.80
  -2   9  10   31.90    1.80
   2  10  10   12.10    0.80
  -2  10  10   10.60    0.90
   3  -9  10  157.48    7.20
   3  -9  10  147.69    7.50
  -3   9 -10  170.98    6.60
   3  -8  10   45.70    2.60
   3  -8  10   40.90    2.90
  -3   8 -10   43.80    2.30
   3  -7  10   81.39    4.20
   3  -7  10   80.49    4.60
  -3   7 -10   82.49    3.80
   3  -6  10   26.00    2.30
  -3   6 -10   27.30    1.70
  -3   6 -10   22.50    1.60
   3  -5  10   65.59    3.50
  -3   5 -10   63.39    3.10
  -3   5 -10   62.19    3.20
   3  -4  10   41.10    2.50
  -3   4 -10   41.80    2.20
  -3   4 -10   38.50    2.20
   3  -3  10  287.57   12.00
  -3   3 -10  282.67   11.60
  -3   3 -10  286.37   11.60
   3  -2  10   55.19    3.00
   3  -2  10   55.29    5.50
  -3   2 -10   54.69    4.10
  -3   2 -10   53.79    2.90
   3  -1  10  158.68    8.50
   3  -1  10  163.78   10.20
   3  -1  10  161.58    7.10
  -3  -1  10  151.58    8.90
   3   0  10    6.60    2.50
   3   0  10    6.80    1.10
   3   0  10    7.50    1.90
   3   1  10  166.28    7.50
   3   1  10  163.18    8.90
  -3   1  10  171.38    9.60
   3   2  10   56.79    4.50
   3   2  10   53.99    3.10
   3   2  10   50.49    4.10
  -3  -2 -10   50.49    3.60
  -3   2  10   68.59    5.20
  -3   2  10   55.39    2.80
   3   3  10  284.87   12.00
   3   3  10  279.47   11.50
   3  -3 -10  261.37   12.10
  -3   3  10  296.07   11.80
  -3  -3 -10  299.47   11.70
   3   4  10   40.90    2.60
   3   4  10   41.20    2.30
   3  -4 -10   41.60    2.30
  -3   4  10   44.70    3.20
  -3   4  10   41.60    2.50
  -3  -4 -10   42.00    2.40
   3  -5 -10   60.19    3.10
   3   5  10   71.09    4.50
   3   5  10   65.39    3.10
  -3   5  10   65.99    3.90
  -3   5  10   65.99    3.50
  -3   5  10   58.99    3.00
  -3  -5 -10   65.69    3.30
   3   6  10   25.90    1.60
   3  -6 -10   27.10    1.70
  -3   6  10   28.60    1.70
  -3  -6 -10   24.00    1.70
  -3   6  10   27.10    1.90
  -3   6  10   25.70    2.30
   3  -7 -10   84.59    3.90
   3   7  10   83.29    3.80
  -3   7  10   83.69    3.80
  -3   7  10   83.99    4.40
   3   8  10   47.30    2.30
  -3   8  10   45.80    2.30
  -3   8  10   44.70    2.30
   3  -9 -10  173.18    7.00
   3   9  10  173.38    7.20
  -3   9  10  187.18    7.30
  -3   9  10  177.58    7.20
   4  -8  10   12.20    1.40
   4  -8  10   11.90    1.30
  -4   8 -10   13.10    1.00
   4  -7  10    7.80    1.30
   4  -7  10    7.70    1.10
  -4   7 -10    6.90    0.80
  -4   7 -10    7.20    0.90
   4  -6  10   13.60    1.70
   4  -6  10   14.60    1.50
  -4   6 -10   14.60    1.20
  -4   6 -10   14.80    1.20
   4  -5  10  252.07   11.40
   4  -5  10  260.07   10.80
  -4   5 -10  246.98   10.30
  -4   5 -10  243.38   10.30
   4  -4  10   18.70    2.10
   4  -4  10   20.30    1.70
  -4   4 -10   20.00    1.50
  -4   4 -10   17.80    1.40
   4  -3  10  142.99    6.60
   4  -3  10  145.39    7.20
  -4   3 -10  130.29    6.10
  -4   3 -10  141.29    6.10
   4  -2  10   83.29    4.30
   4  -2  10   83.69    4.00
   4  -2  10   82.59    4.80
  -4   2 -10   75.39    3.80
   4  -1  10   81.29    4.70
   4  -1  10   76.99    3.70
   4  -1  10   81.99    4.20
  -4   1 -10   75.99    3.70
  -4   1 -10   77.99    3.80
   4   0  10    2.90    0.70
   4   0  10    1.70    0.80
  -4   0 -10    2.50    0.70
  -4   0 -10    2.50    0.70
   4   1  10   76.19    3.60
   4   1  10   78.49    4.70
   4   1  10   75.39    4.00
  -4  -1 -10   74.39    3.60
  -4   1  10   72.39    3.70
  -4  -1 -10   77.59    3.70
   4   2  10   85.69    4.30
   4   2  10   80.99    3.90
   4   2  10   93.39    5.30
  -4   2  10   81.69    4.10
  -4  -2 -10   79.49    4.00
   4   3  10  144.69    7.80
   4   3  10  149.19    6.30
  -4  -3 -10  144.59    6.40
  -4   3  10  149.69    6.70
   4   4  10   20.80    1.40
   4   4  10   23.20    2.50
  -4   4  10   16.80    1.90
  -4  -4 -10   18.90    1.50
  -4   4  10   19.60    1.60
   4   5  10  261.97   10.70
  -4   5  10  267.37   11.70
  -4   5  10  268.17   11.10
  -4  -5 -10  267.27   10.80
  -4   5  10  248.08   10.60
   4   6  10   16.10    1.30
   4  -6 -10   16.00    1.40
  -4   6  10   19.60    1.80
  -4   6  10   17.80    1.30
  -4  -6 -10   16.20    1.30
  -4   6  10   15.40    1.20
   4   7  10   10.00    0.90
  -4   7  10    6.40    1.00
  -4   7  10    7.40    0.90
  -4   7  10    8.50    0.90
   4   8  10   12.70    1.00
  -4   8  10   16.00    1.10
  -4   8  10   15.50    1.10
   5  -7  10   13.50    0.90
   5  -7  10   13.00    1.30
  -5   7 -10   12.10    0.90
  -5   7 -10   14.00    1.00
   5  -6  10   25.40    1.50
   5  -6  10   23.60    2.00
  -5   6 -10   26.60    1.50
  -5   6 -10   23.60    1.60
   5  -5  10   28.00    1.70
   5  -5  10   25.90    2.00
   5  -5  10   28.00    2.30
  -5   5 -10   29.90    1.70
   5  -4  10   18.70    2.00
   5  -4  10   21.00    1.40
   5  -4  10   19.80    1.70
  -5   4 -10   22.20    1.50
   5  -3  10   49.40    3.40
   5  -3  10   53.09    2.60
   5  -3  10   51.59    3.00
  -5   3 -10   51.19    2.60
   5  -2  10  232.68   10.00
   5  -2  10  223.48   10.50
   5  -2  10  230.88    9.50
  -5   2 -10  233.38    9.50
   5  -1  10  700.33   28.80
   5  -1  10  705.33   27.60
   5  -1  10  700.13   28.10
  -5   1 -10  717.73   27.60
  -5   1 -10  683.13   27.60
  -5  -1  10  708.03   27.80
   5   0  10   68.99    4.30
   5   0  10   67.99    3.30
  -5   0 -10   66.79    3.20
  -5   0  10   60.49    3.30
  -5   0 -10   66.89    3.30
   5   1  10  710.23   27.60
   5   1  10  681.73   28.90
  -5   1  10  709.33   27.90
  -5  -1 -10  704.83   27.60
   5   2  10  255.27   11.50
   5   2  10  248.98   10.10
  -5   2  10  254.27   10.50
  -5  -2 -10  252.27   10.20
  -5   2  10  219.08   10.90
   5   3  10   55.49    2.80
  -5   3  10   56.69    3.10
  -5  -3 -10   53.79    2.90
  -5   3  10   55.69    3.50
  -5   3  10   56.49    2.80
   5   4  10   20.90    1.50
  -5   4  10   21.90    2.00
  -5   4  10   22.50    1.70
  -5   4  10   20.30    1.50
  -5  -4 -10   20.10    1.50
   5   5  10   33.30    1.80
  -5   5  10   29.10    1.80
  -5  -5 -10   29.90    1.90
  -5   5  10   29.60    2.00
  -5   5  10   28.10    1.70
  -5   5  10   35.60    2.40
   5   6  10   29.00    1.60
  -5   6  10   26.40    1.60
  -5   6  10   28.40    1.60
  -5  -6 -10   27.30    1.60
  -5   6  10   26.30    2.00
   5   7  10   14.80    1.00
  -5   7  10   15.70    1.10
  -5   7  10   17.50    1.10
   6  -6  10   49.20    2.30
  -6   6 -10   50.29    2.30
   6  -5  10  131.89    5.70
  -6   5 -10  139.69    5.70
   6  -4  10   10.60    1.00
  -6  -4  10   11.20    1.00
  -6   4 -10   11.80    1.00
   6  -3  10   64.59    2.90
  -6   3 -10   62.99    2.90
  -6  -3  10   56.19    3.00
   6  -2  10  124.79    5.00
  -6   2 -10  117.09    5.00
  -6  -2  10  102.29    5.10
   6  -1  10  360.56   14.00
  -6   1 -10  337.57   14.00
  -6  -1  10  338.07   14.20
  -6   1 -10  358.96   14.00
   6   0  10    0.30    0.50
  -6   0 -10    1.00    0.60
  -6   0  10    1.30    0.70
  -6   0  10    1.40    0.60
   6   1  10  371.66   14.50
  -6   1  10  350.26   14.80
  -6  -1 -10  365.26   14.50
  -6   1  10  357.76   15.30
   6   2  10  133.79    5.50
  -6   2  10  123.19    6.20
  -6  -2 -10  129.69    5.60
  -6   2  10  122.49    5.80
   6   3  10   69.09    3.10
  -6   3  10   61.19    3.40
  -6   3  10   66.39    3.80
  -6  -3 -10   68.59    3.20
   6   4  10   14.10    1.10
  -6   4  10   12.60    1.40
  -6   4  10   12.10    1.00
  -6   4  10   12.10    1.20
  -6  -4 -10   10.80    1.10
   6   5  10  140.69    5.70
  -6  -5 -10  135.29    5.80
  -6   5  10  140.79    6.20
  -6   5  10  140.79    5.80
  -6   5  10  132.69    5.70
   6   6  10   50.19    2.30
  -6   6  10   51.49    2.40
  -6   6  10   50.79    2.30
   7  -3  10   52.09    2.40
  -7   3 -10   48.60    2.30
   7  -2  10   36.00    1.80
  -7  -2  10   31.80    2.10
  -7   2 -10   33.70    1.70
   7  -1  10   81.39    3.40
  -7  -1  10   72.79    3.60
  -7  -1  10   81.59    3.90
  -7  -1  10   77.19    3.50
  -7   1 -10   72.59    3.40
   7   0  10    1.40    0.50
  -7   0  10    1.60    0.60
  -7   0  10    2.10    0.60
  -7   0 -10    1.20    0.40
   7   1  10   84.89    3.70
  -7  -1 -10   82.59    3.70
  -7   1  10   84.19    4.20
   7   2  10   37.30    1.80
  -7  -2 -10   36.80    1.90
  -7   2  10   34.20    2.20
   7   3  10   49.40    2.40
  -7  -3 -10   54.39    2.50
  -7   3  10   53.69    2.80
   0  -9  11   18.40    1.30
   0  -8  11  515.85   20.50
   0   7 -11   79.29    3.70
   0   6 -11  221.08    9.20
   0   5 -11  272.97   11.20
   0   4 -11 1293.57   50.19
   0  -3  11  653.93   29.90
   0  -2  11  180.58   10.80
   0  -1  11   67.09    4.40
   0   0  11    1.50    1.00
   0   1  11   70.19    5.20
   0   1  11   71.79    4.70
   0   2  11  212.38   10.00
   0   2  11  191.98    8.30
   0   2  11  189.08   10.30
   0   3  11  732.33   28.20
   0   3  11  695.53   30.60
   0   3  11  709.33   29.80
   0  -4 -11 1350.86   52.89
   0  -4 -11 1345.67   52.79
   0   4  11 1384.16   53.19
   0   5  11  282.07   11.60
   0   5  11  307.17   12.20
   0  -5 -11  280.57   11.90
   0  -5 -11  289.17   11.80
   0   6  11  204.78   10.70
   0   6  11  239.08    9.40
   0   6  11  241.28    9.80
   0  -6 -11  229.08    9.60
   0  -6 -11  231.78    9.40
   0   7  11   81.89    3.70
   0   7  11   85.29    4.50
   0  -7 -11   81.09    3.80
   0  -8 -11  571.64   23.00
   0   8  11  597.44   22.90
   0   9  11   21.20    1.30
   1  -9  11   12.60    1.30
   1  -9  11   14.10    1.20
  -1   9 -11   14.30    1.00
   1  -8  11   53.19    2.80
  -1   8 -11   58.69    2.80
   1  -7  11  168.98    7.40
  -1   7 -11  174.78    7.30
  -1   6 -11  260.87   10.70
  -1   5 -11  244.98   10.10
  -1   4 -11  913.81   35.70
   1  -3  11  550.54   26.30
  -1   3 -11  574.94   22.30
   1  -2  11  581.34   26.90
   1  -1  11  319.17   14.00
  -1  -1  11  290.37   13.60
   1   0  11   99.29    5.80
  -1   0  11   93.29    5.50
  -1   0  11   85.69    5.80
   1   1  11  315.87   13.50
   1   1  11  337.27   15.20
  -1   1  11  343.07   15.00
  -1   1  11  331.37   15.60
   1   2  11  555.64   23.90
   1   2  11  550.54   24.30
   1   2  11  537.45   22.20
  -1   2  11  564.04   24.50
  -1   2  11  573.54   23.70
   1  -3 -11  587.04   24.30
   1   3  11  623.24   27.30
   1   3  11  552.14   24.50
   1  -3 -11  602.34   24.50
  -1  -3 -11  626.14   24.50
  -1   3  11  643.64   29.90
  -1   3  11  629.74   24.50
  -1   3  11  718.93   30.00
  -1  -3 -11  605.74   24.30
   1  -4 -11  973.20   37.30
   1   4  11 1005.70   37.50
   1   4  11  912.51   36.90
   1  -4 -11  955.80   37.10
  -1  -4 -11  944.51   37.00
  -1  -4 -11  945.21   37.20
  -1   4  11  913.21   37.40
   1   5  11  258.37   10.40
   1  -5 -11  253.67   10.70
   1  -5 -11  259.87   10.50
   1   5  11  276.47   11.00
  -1  -5 -11  259.97   10.60
  -1   5  11  255.37   10.80
  -1   5  11  239.48   12.00
  -1   5  11  246.88   10.50
  -1  -5 -11  257.97   10.50
   1   6  11  285.07   11.00
   1  -6 -11  267.87   11.10
   1  -6 -11  262.97   11.20
  -1   6  11  274.67   11.00
  -1  -6 -11  276.67   11.00
  -1  -6 -11  273.47   11.20
  -1   6  11  261.77   12.30
  -1   6  11  273.47   11.40
   1   7  11  201.48    8.90
   1   7  11  190.28    7.80
   1  -7 -11  184.28    7.90
  -1   7  11  186.98    8.50
  -1  -7 -11  181.28    7.80
  -1   7  11  192.78    7.80
   1  -8 -11   61.89    3.00
   1   8  11   62.59    2.90
  -1   8  11   61.79    2.90
   1   9  11   16.10    1.10
  -1   9  11   15.80    1.10
   2  -9  11   76.89    4.00
  -2   9 -11   80.39    3.50
   2  -8  11   92.29    4.80
  -2   8 -11   97.29    4.20
   2  -7  11   34.30    2.20
  -2   7 -11   36.60    2.10
   2  -6  11  143.99    6.50
  -2   6 -11  144.79    6.30
   2  -5  11  356.06   13.20
  -2   5 -11  278.87   12.90
  -2   5 -11  319.57   13.00
   2  -4  11  260.27   10.70
  -2   4 -11  251.07   10.50
  -2   4 -11  257.07   10.60
  -2   3 -11   64.99    3.30
  -2   3 -11   68.49    3.30
   2  -2  11  626.04   25.40
  -2   2 -11  652.23   25.20
  -2   2 -11  641.24   25.20
   2  -1  11   63.59    3.20
   2  -1  11   60.79    4.50
   2  -1  11   63.49    6.00
  -2   1 -11   63.39    3.50
  -2  -1  11   57.49    4.10
   2   0  11  208.98    8.80
   2   0  11  197.88   10.20
  -2   0  11  203.98    9.90
  -2   0  11  199.28   10.70
   2   1  11   64.69    3.40
   2   1  11   64.39    4.70
  -2   1  11   59.99    4.90
  -2  -1 -11   59.19    3.30
  -2   1  11   65.49    4.40
   2   2  11  665.53   26.40
   2  -2 -11  649.83   26.00
   2  -2 -11  669.03   26.20
  -2  -2 -11  628.84   26.00
  -2  -2 -11  675.53   26.20
  -2  -2 -11  684.13   26.10
   2   3  11   67.19    3.50
   2  -3 -11   65.69    3.40
   2  -3 -11   64.09    3.20
   2   3  11   64.99    3.10
  -2  -3 -11   67.19    3.20
  -2  -3 -11   65.79    3.20
  -2  -3 -11   70.49    3.40
  -2   3  11   62.39    3.30
   2   4  11  286.97   11.80
   2   4  11  268.37   11.30
   2  -4 -11  270.27   11.60
   2   4  11  305.57   13.40
   2  -4 -11  272.67   11.40
  -2   4  11  282.17   11.70
  -2  -4 -11  276.47   11.50
   2   5  11  343.97   14.40
   2  -5 -11  326.57   14.00
   2  -5 -11  342.17   14.20
   2   5  11  377.26   15.90
   2   5  11  348.37   13.90
  -2  -5 -11  346.57   14.10
  -2   5  11  354.36   14.40
   2  -6 -11  157.18    6.70
   2   6  11  152.58    6.50
  -2   6  11  165.48    7.50
  -2   6  11  156.48    7.00
  -2  -6 -11  147.49    6.70
  -2   6  11  154.58    6.50
   2   7  11   37.70    2.00
   2  -7 -11   39.80    2.20
  -2   7  11   36.40    2.60
  -2   7  11   40.00    2.00
   2  -8 -11  101.69    4.50
   2   8  11  102.29    4.40
  -2   8  11   99.39    4.40
  -2   8  11  101.49    4.40
   2   9  11   85.89    3.80
  -2   9  11   92.29    3.80
   3  -9  11   17.80    1.50
  -3   9 -11   17.80    1.10
   3  -8  11   20.90    1.80
   3  -8  11   20.40    1.50
  -3   8 -11   21.50    1.30
   3  -7  11   28.60    2.30
   3  -7  11   30.50    2.00
  -3   7 -11   28.30    1.70
   3  -6  11   45.00    2.70
   3  -6  11   44.30    3.10
  -3   6 -11   43.50    2.30
  -3   6 -11   42.80    2.30
   3  -5  11  182.08    7.70
  -3   5 -11  167.88    7.30
  -3   5 -11  163.08    7.20
   3  -4  11  168.58    7.40
  -3   4 -11  158.78    7.00
  -3   4 -11  164.18    7.00
   3  -3  11   23.50    1.80
  -3   3 -11   23.60    1.60
  -3   3 -11   24.50    1.60
   3  -2  11  100.99    4.80
  -3   2 -11   97.09    4.40
  -3   2 -11   92.59    4.40
   3  -1  11  104.59    5.00
  -3   1 -11  100.59    4.50
  -3   1 -11   96.99    4.60
   3   0  11   13.80    2.00
   3   0  11   11.50    1.40
  -3   0 -11   11.10    1.20
  -3   0 -11   12.40    1.20
  -3   0 -11   14.10    1.30
   3   1  11  117.39    5.50
   3   1  11  113.29    6.10
  -3  -1 -11  109.89    5.10
  -3  -1 -11  110.29    5.10
   3   2  11  112.79    6.00
   3   2  11  106.69    5.00
   3   2  11   95.49    4.50
  -3  -2 -11  101.19    4.70
  -3  -2 -11  104.39    4.80
  -3   2  11   97.69    4.70
   3   3  11   25.90    1.60
   3   3  11   25.30    1.90
   3  -3 -11   22.90    1.60
   3   3  11   27.80    2.90
  -3   3  11   26.30    1.80
  -3  -3 -11   25.20    1.80
  -3  -3 -11   25.80    1.70
   3   4  11  169.38    7.20
   3  -4 -11  160.68    7.20
   3   4  11  167.68    7.60
   3   4  11  166.08    8.80
  -3  -4 -11  171.18    7.40
  -3   4  11  181.78    7.60
  -3   4  11  183.18    8.40
   3   5  11  178.68    9.00
   3  -5 -11  176.78    7.60
   3   5  11  179.98    7.60
  -3   5  11  193.88    8.10
  -3   5  11  181.98    8.50
  -3  -5 -11  181.58    7.70
   3  -6 -11   45.40    2.40
   3   6  11   49.00    2.40
  -3   6  11   45.40    3.00
  -3   6  11   46.30    2.30
  -3   6  11   44.30    2.60
  -3  -6 -11   47.70    2.50
   3   7  11   32.00    1.70
   3  -7 -11   31.00    1.80
  -3   7  11   29.70    2.10
  -3   7  11   30.50    1.80
  -3   7  11   30.80    1.70
   3   8  11   24.20    1.40
  -3   8  11   23.20    1.40
  -3   8  11   23.20    1.40
   3   9  11   19.50    1.10
  -3   9  11   17.40    1.10
  -3   9  11   18.80    1.10
   4  -8  11    4.80    0.90
  -4   8 -11    6.60    0.70
   4  -7  11   35.60    2.20
   4  -7  11   37.20    2.60
  -4   7 -11   38.30    1.90
  -4   7 -11   36.20    1.90
   4  -6  11  197.38    8.80
   4  -6  11  189.58    8.20
  -4   6 -11  185.68    7.80
  -4   6 -11  182.18    7.80
   4  -5  11   12.40    1.70
   4  -5  11   12.90    1.40
  -4   5 -11   13.30    1.10
  -4   5 -11   15.10    1.20
   4  -4  11   91.49    5.10
   4  -4  11   92.29    4.60
  -4   4 -11   91.19    4.10
  -4   4 -11   87.99    4.10
   4  -3  11  122.99    6.30
   4  -3  11  126.09    5.80
  -4   3 -11  117.89    5.30
  -4   3 -11  112.59    5.20
   4  -2  11   35.00    2.40
   4  -2  11   30.80    2.60
  -4   2 -11   31.00    1.90
   4  -1  11    6.80    1.50
   4  -1  11    8.70    1.20
   4  -1  11    7.10    1.10
  -4   1 -11    7.50    1.00
  -4   1 -11    6.60    1.10
   4   0  11    4.20    1.10
   4   0  11    6.00    1.10
   4   0  11    5.00    0.80
  -4   0 -11    4.70    0.90
  -4   0 -11    5.60    0.90
   4   1  11    7.90    1.10
   4   1  11    8.00    1.00
   4   1  11    6.60    1.50
  -4  -1 -11   11.00    1.20
  -4  -1 -11    7.00    1.00
   4   2  11   32.30    1.90
   4   2  11   34.40    3.10
   4   2  11   29.10    2.10
  -4  -2 -11   32.60    2.00
  -4  -2 -11   32.60    2.00
  -4   2  11   31.50    2.10
   4   3  11  124.09    5.50
  -4   3  11  131.39    5.80
  -4   3  11  124.59    6.30
  -4  -3 -11  121.59    5.60
   4   4  11   84.19    5.20
   4   4  11   94.59    4.20
  -4  -4 -11   92.29    4.30
  -4   4  11   95.09    4.50
  -4   4  11   94.39    5.00
   4   5  11   14.00    1.20
  -4  -5 -11   14.40    1.30
  -4   5  11   16.20    1.40
  -4   5  11   16.30    1.70
   4   6  11  220.58    8.40
   4  -6 -11  192.48    8.30
  -4  -6 -11  193.18    8.40
  -4   6  11  210.58    8.40
  -4   6  11  200.98    8.30
  -4   6  11  205.08    9.00
   4   7  11   43.80    2.10
  -4   7  11   41.40    2.10
  -4   7  11   45.00    2.20
   4   8  11    5.90    0.60
  -4   8  11    5.90    0.70
  -4   8  11    6.10    0.70
   5  -7  11   13.50    1.20
   5  -6  11    1.40    0.60
  -5   6 -11    2.10    0.50
   5  -5  11   24.00    1.80
   5  -5  11   26.00    2.10
   5  -5  11   24.80    1.40
  -5   5 -11   28.30    1.60
   5  -4  11  115.89    5.00
   5  -4  11  114.59    5.50
   5  -4  11  118.09    6.00
  -5   4 -11  124.59    5.20
   5  -3  11   65.29    3.10
   5  -3  11   64.59    3.90
   5  -3  11   61.49    3.50
  -5   3 -11   68.99    3.20
   5  -2  11  150.08    7.20
   5  -2  11  135.59    6.50
   5  -2  11  148.49    6.10
  -5   2 -11  141.79    6.20
   5  -1  11  126.79    6.40
   5  -1  11  119.49    5.60
   5  -1  11  127.39    5.30
  -5  -1  11  107.39    5.30
  -5   1 -11  120.09    5.30
  -5   1 -11  124.09    5.30
   5   0  11    4.40    0.80
   5   0  11    3.20    1.00
  -5   0 -11    5.20    0.80
   5   1  11  130.79    5.50
   5   1  11  113.49    6.60
  -5  -1 -11  140.79    5.60
  -5   1  11  121.49    5.70
   5   2  11  147.59    6.20
   5   2  11  128.19    7.20
  -5  -2 -11  154.38    6.30
  -5   2  11  149.88    6.50
  -5   2  11  144.49    7.00
   5   3  11   72.39    3.30
  -5  -3 -11   68.89    3.30
  -5   3  11   61.59    3.20
  -5   3  11   72.29    3.60
  -5   3  11   68.39    4.00
   5   4  11  132.69    5.40
  -5   4  11  122.89    5.70
  -5   4  11  122.89    5.40
  -5   4  11  127.49    6.20
  -5  -4 -11  125.89    5.50
   5   5  11   29.70    1.60
  -5  -5 -11   26.20    1.60
  -5   5  11   25.20    1.80
  -5   5  11   28.40    2.10
  -5   5  11   28.50    1.60
   5   6  11    1.10    0.40
  -5   6  11    1.50    0.40
  -5   6  11    1.40    0.50
  -5  -6 -11    1.20    0.50
  -5   6  11    1.70    0.50
   5   7  11   17.70    1.00
  -5   7  11   16.90    1.00
   6  -5  11   24.20    1.30
  -6   5 -11   27.00    1.40
   6  -4  11   14.60    1.00
  -6   4 -11   15.50    1.10
   6  -3  11   45.40    2.30
  -6  -3  11   48.40    2.40
  -6   3 -11   50.89    2.40
   6  -2  11   24.70    1.40
  -6   2 -11   24.20    1.40
  -6  -2  11   21.10    1.50
   6  -1  11   87.89    3.70
  -6   1 -11   87.19    3.70
  -6  -1  11   80.49    3.90
  -6   1 -11   72.69    3.80
   6   0  11    8.00    0.90
  -6   0 -11    9.70    0.90
  -6   0  11    7.10    1.00
  -6   0  11    6.30    1.10
   6   1  11   92.09    4.00
  -6  -1 -11   90.49    4.10
  -6   1  11   91.69    4.70
  -6   1  11   88.19    4.30
   6   2  11   26.70    1.50
  -6   2  11   23.70    1.70
  -6   2  11   24.80    2.00
  -6  -2 -11   26.10    1.60
   6   3  11   57.19    2.60
  -6   3  11   50.69    2.80
  -6  -3 -11   53.49    2.60
  -6   3  11   56.09    3.20
   6   4  11   16.40    1.10
  -6   4  11   16.50    1.50
  -6  -4 -11   16.90    1.20
   6   5  11   28.90    1.40
  -6  -5 -11   27.20    1.50
  -6   5  11   26.70    1.70
  -6   5  11   26.70    1.40
   7   0  11  316.57   12.10
  -7   0  11  313.57   12.60
  -7   0 -11  284.97   12.10
  -7   0  11  313.37   12.20
   0  -8  12   17.30    1.20
   0   7 -12  467.15   18.50
   0   6 -12   81.79    3.80
   0   5 -12  211.98    8.80
   0   4 -12    8.10    1.00
   0   3 -12   36.70    2.10
   0   2 -12  236.88    9.50
   0   2 -12  223.48    9.50
   0   1 -12   20.30    1.50
   0   1 -12   20.10    1.50
   0   0 -12  110.09    4.90
   0   0 -12  105.09    4.90
   0   0 -12  109.89    4.90
   0  -1 -12   21.10    1.60
   0  -1 -12   20.80    1.60
   0  -1 -12   21.10    1.50
   0  -2 -12  228.68    9.50
   0   2  12  223.18    9.50
   0  -2 -12  228.28    9.40
   0  -3 -12   38.70    2.30
   0   3  12   38.60    2.40
   0  -3 -12   37.60    2.20
   0   4  12    9.00    1.20
   0  -4 -12    8.70    1.10
   0  -4 -12    8.60    1.20
   0   4  12    9.00    2.00
   0  -5 -12  219.08    9.50
   0   5  12  219.08    9.20
   0   5  12  235.78    9.70
   0  -5 -12  229.58    9.30
   0  -6 -12   85.09    3.90
   0   6  12   91.59    3.80
   0   6  12   79.69    4.10
   0  -6 -12   84.89    4.00
   0   7  12  452.35   19.70
   0  -7 -12  497.85   19.20
   0   7  12  510.85   19.20
   0  -8 -12   21.30    1.40
   0   8  12   22.20    1.30
   0   9  12   17.20    1.10
   1  -9  12   57.19    3.10
  -1   9 -12   62.99    2.70
   1  -8  12    3.60    0.70
  -1   8 -12    3.00    0.60
   1  -7  12  153.38    6.80
  -1   7 -12  164.08    6.70
  -1   6 -12   94.89    4.30
  -1   5 -12  848.02   33.20
  -1   4 -12   94.09    4.30
   1   3 -12  144.49    6.40
  -1   3 -12  154.68    6.50
  -1   3 -12  147.79    6.40
   1   2 -12  531.55   20.60
  -1   2 -12  513.95   20.70
  -1   2 -12  516.75   20.70
   1   1 -12   90.79    4.20
  -1   1 -12   92.39    4.20
  -1   1 -12   90.79    4.30
   1   0 -12  244.68    9.90
   1   0 -12  232.08   10.00
  -1   0 -12  240.38   10.00
  -1   0 -12  245.98    9.90
  -1   0 -12  241.68   10.00
   1   1  12   94.69    4.50
   1  -1 -12   90.09    4.40
   1  -1 -12   94.79    4.20
  -1  -1 -12   90.29    4.30
  -1  -1 -12   90.79    4.20
  -1  -1 -12   96.39    4.30
   1  -2 -12  537.35   21.10
   1  -2 -12  538.85   21.30
   1   2  12  538.45   21.40
  -1  -2 -12  541.25   21.30
  -1   2  12  533.35   21.20
  -1  -2 -12  526.25   21.20
  -1  -2 -12  517.45   21.10
   1  -3 -12  156.18    6.70
   1  -3 -12  157.88    6.90
   1   3  12  151.28    6.90
  -1  -3 -12  160.08    6.60
  -1  -3 -12  157.08    6.80
  -1   3  12  152.08    6.90
   1  -4 -12   95.19    4.90
   1   4  12  111.39    5.20
   1   4  12  119.39    6.60
   1  -4 -12  102.79    4.80
  -1   4  12  122.39    6.50
  -1  -4 -12  100.29    4.70
  -1  -4 -12  101.29    4.90
  -1   4  12  104.29    5.00
   1  -5 -12  926.91   35.20
   1   5  12  958.20   37.10
   1   5  12  923.61   35.10
   1  -5 -12  896.71   35.30
   1   5  12  887.51   35.50
  -1   5  12  942.91   35.60
  -1   5  12  761.02   36.50
  -1  -5 -12  893.41   35.30
  -1  -5 -12  919.81   35.20
   1   6  12  100.49    4.40
   1  -6 -12   97.69    4.50
   1  -6 -12  100.29    4.60
  -1   6  12  104.49    4.40
  -1   6  12   98.69    5.40
  -1   6  12   99.79    4.70
  -1  -6 -12   99.09    4.50
  -1  -6 -12  101.69    4.40
   1  -7 -12  172.88    7.30
   1   7  12  179.88    7.20
  -1   7  12  172.88    7.80
  -1  -7 -12  170.98    7.20
  -1   7  12  175.28    7.20
   1   8  12    4.10    0.60
   1  -8 -12    4.30    0.70
  -1   8  12    4.30    0.60
   1   9  12   72.09    3.20
  -1   9  12   74.59    3.20
   2  -8  12   19.10    1.60
   2  -8  12   18.90    1.40
  -2   8 -12   20.30    1.30
   2  -7  12  102.69    4.90
  -2   7 -12  110.39    4.70
  -2   6 -12  133.99    5.80
   2  -5  12   32.20    2.00
  -2   5 -12   30.10    1.90
   2  -4  12  469.55   18.60
  -2   4 -12  472.15   18.40
  -2   4 -12  442.96   18.40
   2  -3  12   68.19    3.40
  -2   3 -12   59.79    3.10
  -2   3 -12   62.49    3.20
   2  -2  12   46.80    2.60
  -2   2 -12   41.60    2.40
  -2   2 -12   46.50    2.50
   2  -1  12  236.18    9.80
  -2   1 -12  226.88    9.50
  -2   1 -12  220.28    9.40
   2   0 -12   80.29    3.80
   2   0  12   88.99    4.30
   2   0 -12   83.49    4.00
  -2   0 -12   81.69    3.90
  -2   0 -12   84.59    4.00
  -2   0 -12   84.19    4.00
   2  -1 -12  223.88    9.70
   2  -1 -12  218.68    9.50
   2   1  12  240.78   10.00
  -2  -1 -12  243.98    9.70
  -2  -1 -12  234.78    9.70
  -2  -1 -12  229.68    9.60
   2  -2 -12   43.60    2.40
   2   2  12   52.59    3.70
   2  -2 -12   49.20    2.70
  -2   2  12   44.50    2.50
  -2  -2 -12   45.80    2.50
  -2  -2 -12   41.20    2.40
  -2  -2 -12   45.60    2.60
   2   3  12   65.29    4.60
   2  -3 -12   65.69    3.20
   2   3  12   73.59    3.70
   2  -3 -12   64.89    3.50
  -2  -3 -12   62.49    3.20
  -2   3  12   66.69    3.40
  -2  -3 -12   68.99    3.40
   2   4  12  477.75   19.60
   2   4  12  444.36   20.80
   2  -4 -12  499.45   19.20
   2   4  12  466.75   19.00
   2  -4 -12  500.45   19.40
  -2  -4 -12  467.75   19.10
  -2  -4 -12  485.55   19.30
  -2   4  12  519.35   19.50
   2  -5 -12   35.00    2.00
   2   5  12   34.70    2.40
   2   5  12   31.80    1.90
   2   5  12   34.00    3.20
  -2   5  12   39.50    3.00
  -2  -5 -12   32.90    2.10
  -2   5  12   37.50    2.30
   2  -6 -12  142.49    5.90
   2   6  12  139.49    5.80
  -2   6  12  141.29    5.80
  -2   6  12  130.99    6.10
  -2  -6 -12  131.49    5.90
  -2   6  12  141.49    6.60
   2  -7 -12  110.39    4.70
   2   7  12  118.79    4.70
  -2   7  12   93.49    5.10
  -2   7  12  112.79    4.70
   2  -8 -12   23.10    1.40
   2   8  12   22.40    1.30
  -2   8  12   21.00    1.30
  -2   8  12   22.10    1.30
   3  -8  12   77.39    4.00
  -3   8 -12   82.29    3.50
   3  -7  12   40.20    2.60
   3  -7  12   39.40    2.30
  -3   7 -12   43.40    2.10
   3  -6  12   10.20    1.40
   3  -6  12   11.40    1.20
  -3   6 -12   10.10    1.00
  -3   6 -12    7.60    0.90
   3  -5  12   62.19    3.80
   3  -5  12   58.99    3.20
  -3   5 -12   55.89    2.80
  -3   5 -12   53.19    2.80
   3  -4  12  144.59    6.60
  -3   4 -12  143.59    6.20
  -3   4 -12  146.99    6.20
   3  -3  12   60.09    3.30
  -3   3 -12   65.69    3.10
  -3   3 -12   60.59    3.00
   3  -2  12   74.09    3.80
  -3   2 -12   71.19    3.50
  -3   2 -12   68.89    3.40
   3  -1  12   59.09    3.30
  -3   1 -12   59.59    3.00
  -3   1 -12   58.19    2.90
   3   0  12  524.75   21.50
   3   0  12  543.85   20.90
  -3   0 -12  517.85   20.40
  -3   0 -12  476.15   20.20
  -3   0 -12  495.35   20.40
   3   1  12   61.69    3.40
   3   1  12   68.49    4.30
  -3  -1 -12   59.79    3.20
  -3  -1 -12   58.79    3.10
   3   2  12   75.89    3.90
   3   2  12   72.09    4.80
   3   2  12   70.29    3.40
  -3  -2 -12   75.39    3.70
  -3   2  12   75.39    3.70
  -3  -2 -12   75.79    3.60
   3  -3 -12   63.49    3.20
   3   3  12   66.49    3.10
   3   3  12   71.79    3.60
  -3  -3 -12   67.09    3.20
  -3  -3 -12   64.89    3.30
  -3   3  12   66.49    3.40
   3   4  12  159.58    6.70
   3  -4 -12  155.88    6.80
   3   4  12  163.68    8.40
  -3  -4 -12  151.88    6.90
  -3   4  12  167.68    7.80
  -3   4  12  168.48    7.20
   3  -5 -12   63.19    3.10
   3   5  12   62.29    3.00
  -3   5  12   67.79    3.80
  -3  -5 -12   58.59    3.10
  -3   5  12   66.69    3.40
   3   6  12   10.20    0.90
   3  -6 -12   10.30    1.00
  -3   6  12    8.80    1.00
  -3  -6 -12   10.50    1.00
  -3   6  12   10.10    1.40
  -3   6  12    9.90    0.90
   3   7  12   50.19    2.30
   3  -7 -12   47.10    2.30
  -3   7  12   47.70    2.30
  -3   7  12   44.70    2.20
  -3   7  12   41.80    2.60
   3   8  12   86.69    3.70
  -3   8  12   87.29    3.70
  -3   8  12   85.59    3.70
   4  -7  12   79.89    4.00
  -4   7 -12   79.69    3.40
   4  -6  12   58.29    3.30
   4  -6  12   53.89    3.00
  -4   6 -12   57.69    2.70
  -4   6 -12   56.59    2.60
   4  -5  12   35.50    2.60
   4  -5  12   34.40    2.20
  -4   5 -12   36.70    1.90
  -4   5 -12   34.60    1.90
   4  -4  12  184.18    7.80
   4  -4  12  173.28    8.20
  -4   4 -12  174.68    7.40
  -4   4 -12  171.28    7.30
   4  -3  12  210.38    9.20
   4  -3  12  213.88    9.70
  -4   3 -12  205.88    8.60
  -4   3 -12  211.58    8.70
   4  -2  12   51.69    3.40
   4  -2  12   49.40    3.00
  -4   2 -12   49.10    2.60
   4  -1  12   57.69    3.20
   4  -1  12   57.09    3.70
  -4   1 -12   55.09    2.90
   4   0  12  272.47   12.60
   4   0  12  287.87   11.90
   4   0  12  271.87   11.30
  -4   0 -12  292.37   11.50
  -4   0 -12  282.47   11.50
   4   1  12   54.19    3.90
   4   1  12   59.39    2.90
  -4  -1 -12   61.59    3.00
  -4   1  12   59.29    3.00
  -4  -1 -12   60.49    3.00
   4   2  12   49.99    2.80
   4   2  12   39.00    3.40
   4   2  12   47.60    2.40
  -4   2  12   49.30    2.70
  -4  -2 -12   47.80    2.50
  -4  -2 -12   51.59    2.60
   4   3  12  219.38    9.10
  -4  -3 -12  217.18    9.20
  -4   3  12  223.88    9.50
  -4   3  12  228.48   10.00
   4   4  12  162.58    8.60
   4   4  12  177.88    7.30
  -4  -4 -12  177.78    7.40
  -4   4  12  175.48    8.10
  -4   4  12  183.38    7.70
   4   5  12   39.10    2.00
  -4   5  12   38.60    2.60
  -4   5  12   37.70    2.00
  -4   5  12   34.90    2.20
  -4  -5 -12   37.60    2.10
   4   6  12   67.99    2.90
  -4  -6 -12   59.69    2.90
  -4   6  12   67.59    3.00
  -4   6  12   60.09    3.30
   4   7  12   92.89    3.90
  -4   7  12   93.99    3.90
  -4   7  12   88.39    3.90
   5  -5  12   31.60    2.20
  -5   5 -12   31.70    1.70
   5  -4  12   99.79    4.80
   5  -4  12  100.79    5.20
  -5   4 -12  114.59    4.60
   5  -3  12   16.70    1.70
   5  -3  12   18.00    1.20
   5  -3  12   19.30    1.50
  -5   3 -12   17.50    1.30
   5  -2  12   10.40    0.90
   5  -2  12   10.80    1.10
   5  -2  12    9.80    1.50
  -5   2 -12   11.30    1.00
   5  -1  12   89.89    5.00
   5  -1  12   82.39    4.40
   5  -1  12   91.99    4.00
  -5  -1  12   87.99    4.10
  -5   1 -12   95.39    4.10
   5   0  12   11.60    1.70
   5   0  12   12.40    1.00
  -5   0  12   12.60    1.20
  -5   0 -12   12.40    1.10
  -5   0 -12   13.00    1.10
   5   1  12   96.99    4.20
   5   1  12   85.99    5.20
  -5   1  12   91.89    4.40
  -5  -1 -12  100.99    4.30
  -5  -1 -12   97.89    4.20
   5   2  12   11.50    1.00
  -5   2  12   11.00    1.40
  -5  -2 -12   11.50    1.10
  -5   2  12   13.50    1.30
   5   3  12   19.40    1.30
  -5   3  12   20.20    1.50
  -5  -3 -12   19.00    1.40
  -5   3  12   21.10    1.80
   5   4  12  116.09    4.70
  -5   4  12  107.09    5.00
  -5  -4 -12  108.99    4.80
  -5   4  12  109.59    4.70
  -5   4  12  113.59    5.40
   5   5  12   39.80    1.90
  -5   5  12   37.40    2.30
  -5  -5 -12   34.00    1.90
  -5   5  12   36.00    1.80
   6  -3  12   69.29    3.10
  -6   3 -12   77.39    3.20
   6  -2  12   54.79    2.50
  -6   2 -12   56.49    2.60
   6  -1  12   12.80    0.90
  -6   1 -12   13.10    1.00
   6   0  12    1.00    0.40
  -6   0  12    0.50    0.50
  -6   0 -12    1.30    0.50
  -6   0  12    1.20    0.50
   6   1  12   13.90    1.00
  -6  -1 -12   12.30    1.00
  -6   1  12   12.00    1.30
  -6   1  12   10.30    1.20
   6   2  12   61.29    2.70
  -6   2  12   59.99    3.20
  -6  -2 -12   59.09    2.80
   6   3  12   82.29    3.40
  -6  -3 -12   76.89    3.50
  -6   3  12   77.29    3.90
   0   7 -13   28.90    1.60
   0   6 -13   23.80    1.50
   0   5 -13  349.96   14.00
   0   4 -13    7.40    1.00
   0   3 -13   96.89    4.40
   0   2 -13  236.18    9.90
   0   2 -13  244.68    9.90
   0   1 -13    7.70    1.00
   0   1 -13    5.50    0.90
   0   0 -13    1.90    0.70
   0   0 -13    0.10    0.50
   0  -1 -13    4.50    0.80
   0  -1 -13    4.20    0.80
   0   1  13    4.20    0.80
   0  -2 -13  245.98   10.30
   0  -2 -13  244.78   10.10
   0   2  13  246.68   10.30
   0  -3 -13  106.09    4.70
   0  -3 -13  103.09    4.80
   0   3  13  100.79    4.90
   0  -4 -13    8.50    1.10
   0   4  13    8.90    2.00
   0  -4 -13    7.40    1.10
   0   4  13    7.30    1.10
   0  -5 -13  354.96   14.60
   0  -5 -13  357.96   14.50
   0   5  13  374.26   14.90
   0   6  13   27.00    1.40
   0   6  13   21.80    1.80
   0  -6 -13   23.70    1.60
   0  -6 -13   23.50    1.60
   0   7  13   31.60    1.60
   0  -7 -13   31.90    1.70
   0   7  13   31.20    2.00
   0   8  13  184.08    7.30
   0  -8 -13  177.18    7.30
  -1   8 -13   43.40    2.00
  -1   7 -13    1.90    0.50
  -1   6 -13   63.59    3.00
  -1   5 -13  271.27   11.00
   1   4 -13  100.39    4.70
  -1   4 -13  109.99    4.70
   1   3 -13   45.90    2.40
  -1   3 -13   48.30    2.50
  -1   3 -13   41.00    2.40
   1   2 -13  244.78    9.80
  -1   2 -13  233.78    9.80
  -1   2 -13  236.28    9.80
   1   1 -13  199.18    8.40
  -1   1 -13  200.88    8.50
  -1   1 -13  209.78    8.50
   1   0 -13   64.09    3.20
   1   0 -13   65.99    3.10
   1   0  13   59.39    3.20
  -1   0 -13   60.89    3.10
  -1   0 -13   58.79    3.10
  -1   0 -13   61.29    3.10
   1  -1 -13  202.78    8.60
   1  -1 -13  200.68    8.80
   1   1  13  219.58    8.90
  -1  -1 -13  209.48    8.80
  -1  -1 -13  205.58    8.70
  -1  -1 -13  211.28    8.70
   1  -2 -13  259.27   10.90
   1   2  13  266.07   11.00
   1  -2 -13  260.87   10.70
  -1  -2 -13  245.38   10.80
  -1  -2 -13  253.47   10.70
  -1   2  13  285.37   11.00
   1   3  13   51.79    2.90
   1  -3 -13   48.40    2.80
   1  -3 -13   50.59    2.60
   1   3  13   52.49    4.00
  -1  -3 -13   47.50    2.60
  -1   3  13   50.39    2.80
  -1  -3 -13   46.20    2.70
   1   4  13  123.89    5.50
   1  -4 -13  112.39    5.20
   1   4  13  115.09    6.60
   1  -4 -13  116.89    5.10
  -1  -4 -13  112.09    5.00
  -1  -4 -13  104.99    5.10
  -1   4  13  120.29    5.40
   1   5  13  275.47   11.00
   1  -5 -13  270.47   11.30
   1  -5 -13  279.87   11.10
   1   5  13  274.47   11.40
  -1   5  13  276.87   11.40
  -1  -5 -13  265.97   11.20
  -1  -5 -13  273.67   11.10
   1  -6 -13   68.79    3.10
   1  -6 -13   64.59    3.10
   1   6  13   65.29    2.90
  -1  -6 -13   61.59    3.10
  -1   6  13   60.79    3.60
  -1   6  13   64.39    2.90
  -1  -6 -13   62.29    3.00
  -1   6  13   61.79    3.20
   1   7  13    0.70    0.40
   1  -7 -13    1.20    0.50
  -1   7  13    0.40    0.50
  -1   7  13    1.20    0.40
  -1  -7 -13    0.50    0.40
   1   8  13   47.30    2.10
   1  -8 -13   45.80    2.20
  -1   8  13   45.20    2.10
  -2   7 -13   22.80    1.40
   2  -6  13   63.59    3.30
  -2   6 -13   72.89    3.20
   2  -5  13  174.08    7.60
  -2   5 -13  181.68    7.40
   2  -4  13   29.40    1.90
  -2   4 -13   27.90    1.80
  -2   4 -13   29.70    1.80
   2  -3  13   47.40    2.70
  -2   3 -13   46.20    2.50
  -2   3 -13   49.99    2.60
   2  -2  13  589.84   23.20
  -2   2 -13  573.34   22.90
  -2   2 -13  573.04   22.90
   2  -1  13   13.80    1.40
  -2   1 -13   13.60    1.30
  -2   1 -13   14.60    1.30
   2   0  13  115.69    5.30
   2   0 -13  110.09    5.10
   2   0 -13  110.29    4.90
  -2   0 -13  109.69    5.00
  -2   0 -13  114.99    5.10
  -2   0 -13  111.99    5.00
   2  -1 -13   13.00    1.20
   2   1  13   15.30    1.40
   2  -1 -13   15.00    1.50
  -2  -1 -13   16.70    1.30
  -2  -1 -13   13.70    1.20
  -2  -1 -13   14.70    1.40
   2   2  13  682.13   25.40
   2  -2 -13  605.34   24.90
   2  -2 -13  598.84   25.10
   2   2  13  715.33   26.80
  -2   2  13  620.24   25.10
  -2  -2 -13  616.24   24.90
  -2  -2 -13  613.84   25.00
  -2  -2 -13  615.44   25.00
   2  -3 -13   51.19    2.60
   2  -3 -13   51.19    2.80
   2   3  13   42.50    3.70
   2   3  13   49.99    2.90
  -2  -3 -13   51.29    2.70
  -2   3  13   49.80    2.70
  -2  -3 -13   54.89    2.60
   2   4  13   30.80    1.70
   2   4  13   30.10    2.10
   2   4  13   27.70    2.90
   2  -4 -13   31.00    1.90
  -2   4  13   33.00    2.00
  -2   4  13   28.90    2.70
  -2  -4 -13   31.50    2.00
  -2  -4 -13   32.30    1.80
   2   5  13  195.28    7.80
   2  -5 -13  193.68    7.90
  -2   5  13  194.38    8.20
  -2   5  13  183.88    8.70
  -2  -5 -13  181.28    7.90
   2   6  13   72.59    3.20
   2  -6 -13   71.89    3.30
  -2   6  13   77.39    3.90
  -2  -6 -13   67.59    3.30
  -2   6  13   64.29    3.40
   2   7  13   23.70    1.30
   2  -7 -13   23.30    1.40
  -2   7  13   22.50    1.20
  -2   7  13   20.20    1.60
   3  -7  13   91.19    4.50
  -3   7 -13   93.89    3.90
   3  -6  13   48.90    3.00
   3  -6  13   51.59    2.70
  -3   6 -13   52.99    2.40
   3  -5  13  193.08    8.50
   3  -5  13  201.68    8.10
  -3   5 -13  171.18    7.70
  -3   5 -13  182.58    7.70
   3  -4  13    4.40    1.10
   3  -4  13    5.20    1.00
  -3   4 -13    3.20    0.60
  -3   4 -13    4.20    0.70
   3  -3  13  103.19    4.80
  -3   3 -13   94.09    4.40
  -3   3 -13   95.09    4.30
   3  -2  13   90.39    4.60
   3  -2  13   98.49    5.20
  -3   2 -13   93.69    4.30
  -3   2 -13   97.39    4.40
   3  -1  13  132.49    6.40
   3  -1  13  145.59    7.00
  -3   1 -13  138.59    6.00
  -3   1 -13  140.49    6.10
   3   0  13   58.69    3.20
   3   0  13   63.59    4.00
  -3   0 -13   58.89    3.00
  -3   0 -13   55.79    3.00
  -3   0 -13   56.99    2.90
   3   1  13  132.49    6.90
  -3  -1 -13  134.19    5.70
  -3   1  13  115.89    5.90
  -3  -1 -13  131.09    5.50
  -3  -1 -13  136.69    5.70
   3   2  13   96.99    4.70
  -3  -2 -13   99.19    4.50
  -3   2  13   94.09    4.50
  -3  -2 -13   95.09    4.30
   3   3  13  105.89    4.90
   3   3  13  101.69    4.40
   3  -3 -13   96.09    4.50
  -3   3  13  102.89    4.80
  -3  -3 -13  107.29    4.70
   3   4  13    4.00    1.30
   3   4  13    4.50    0.70
   3  -4 -13    4.30    0.70
  -3   4  13    4.20    0.90
  -3  -4 -13    4.10    0.80
  -3   4  13    3.00    0.80
   3   5  13  203.78    7.90
   3  -5 -13  191.88    7.90
  -3   5  13  181.38    8.60
  -3  -5 -13  192.88    8.00
  -3   5  13  196.98    8.20
   3  -6 -13   55.69    2.60
   3   6  13   60.09    2.60
  -3  -6 -13   51.79    2.60
  -3   6  13   59.09    3.20
   3  -7 -13   98.89    4.20
   3   7  13  105.09    4.20
  -3   7  13   96.09    4.10
  -3   7  13  102.49    4.20
   4  -6  13    4.40    0.90
  -4   6 -13    4.50    0.60
  -4   6 -13    4.10    0.50
   4  -5  13  137.39    6.40
   4  -5  13  148.69    6.50
  -4   5 -13  138.39    5.70
  -4   5 -13  131.89    5.80
   4  -4  13    5.20    0.90
   4  -4  13    5.50    1.10
  -4   4 -13    7.10    0.80
  -4   4 -13    6.50    0.70
   4  -3  13   95.09    5.00
   4  -3  13  100.39    4.70
  -4   3 -13   92.39    4.20
  -4   3 -13   96.29    4.30
   4  -2  13    4.50    0.90
   4  -2  13    2.30    0.80
  -4   2 -13    3.20    0.70
   4  -1  13   61.79    3.90
   4  -1  13   65.39    3.40
  -4   1 -13   67.29    3.20
   4   0  13  134.89    7.20
   4   0  13  147.09    6.50
  -4   0 -13  148.49    6.20
  -4   0 -13  145.89    6.20
   4   1  13   66.89    3.30
   4   1  13   62.49    2.90
   4   1  13   50.49    3.80
  -4   1  13   61.69    3.10
  -4  -1 -13   61.99    3.00
  -4  -1 -13   65.89    3.10
   4   2  13    2.90    0.60
   4   2  13    1.90    0.80
   4   2  13    2.30    1.10
  -4   2  13    3.30    0.70
  -4  -2 -13    2.60    0.60
  -4  -2 -13    1.90    0.60
   4   3  13   98.19    4.20
  -4   3  13   97.19    4.50
  -4   3  13   95.79    5.00
  -4  -3 -13  100.39    4.40
   4   4  13    6.40    0.80
  -4   4  13    8.20    1.00
  -4  -4 -13    7.60    1.00
  -4   4  13    8.80    1.20
   4   5  13  157.88    6.40
  -4   5  13  163.78    7.10
  -4   5  13  163.48    6.50
  -4  -5 -13  144.09    6.50
   4   6  13    4.90    0.60
  -4  -6 -13    4.60    0.60
  -4   6  13    4.90    0.80
  -4   6  13    5.40    0.60
   5  -4  13   47.10    2.80
  -5   4 -13   48.20    2.20
   5  -3  13  124.29    6.10
  -5   3 -13  132.79    5.40
   5  -2  13  100.29    5.20
  -5   2 -13  106.09    4.50
   5  -1  13   25.80    2.20
   5  -1  13   27.50    1.40
  -5  -1  13   26.90    1.60
  -5   1 -13   28.00    1.60
   5   0  13    1.00    0.70
   5   0  13    1.80    0.50
  -5   0 -13    0.80    0.50
  -5   0 -13    0.90    0.50
  -5   0  13    1.00    0.50
   5   1  13   22.80    2.20
   5   1  13   26.90    1.50
  -5  -1 -13   27.30    1.50
  -5  -1 -13   29.20    1.60
  -5   1  13   30.40    1.80
   5   2  13  102.49    4.30
  -5  -2 -13  103.19    4.40
  -5   2  13   99.39    4.60
  -5   2  13  102.79    4.90
   5   3  13  138.19    5.60
  -5   3  13  131.59    6.10
  -5  -3 -13  135.39    5.70
   5   4  13   54.49    2.40
  -5  -4 -13   52.49    2.50
  -5   4  13   52.59    2.40
  -5   4  13   55.99    2.90
   0   6 -14  232.18    9.30
   0   5 -14    8.10    0.90
   0   4 -14  144.29    6.10
   0   3 -14   55.49    2.70
   0   2 -14   90.99    4.10
   0   1 -14    2.60    0.70
   0   0 -14   91.49    4.30
   0   0 -14   95.19    4.20
   0  -1 -14    3.40    0.80
   0  -1 -14    3.80    0.80
   0   1  14    3.40    0.80
   0   2  14   86.39    4.30
   0  -2 -14   92.89    4.30
   0  -2 -14   95.99    4.20
   0  -3 -14   56.99    3.00
   0   3  14   56.59    3.10
   0   3  14   57.49    4.10
   0  -3 -14   58.09    2.90
   0  -4 -14  151.18    6.50
   0  -4 -14  153.78    6.70
   0   4  14  159.78    6.80
   0   5  14    7.20    1.00
   0  -5 -14    7.40    1.00
   0  -5 -14    8.10    1.00
   0  -6 -14  219.18    8.50
   0   6  14  194.28    9.00
   0   6  14  185.68    8.60
   0  -6 -14  234.28    8.50
   0  -7 -14  189.28    7.60
   0   7  14  185.38    7.50
  -1   7 -14  201.98    8.10
  -1   6 -14  108.59    4.60
  -1   5 -14   90.59    4.00
  -1   4 -14  176.58    7.30
   1   3 -14  152.38    6.40
  -1   3 -14  150.48    6.40
  -1   3 -14  153.38    6.40
   1   2 -14   97.69    4.30
  -1   2 -14  100.09    4.40
  -1   2 -14   92.89    4.30
   1   1 -14   88.49    4.00
   1  -1  14   85.39    4.20
  -1   1 -14   89.69    4.10
  -1   1 -14   89.59    4.00
   1   0 -14  213.18    9.30
   1   0 -14  222.88    9.20
   1   0  14  225.98    9.40
  -1   0 -14  225.68    9.20
  -1   0 -14  227.68    9.30
  -1   0 -14  222.08    9.30
   1   1  14   81.89    4.10
   1  -1 -14   89.99    4.10
   1  -1 -14   89.79    4.00
  -1   1  14   84.59    4.10
  -1  -1 -14   89.49    4.10
  -1  -1 -14   87.39    4.00
   1   2  14   95.89    5.80
   1  -2 -14  102.39    4.70
   1  -2 -14  104.69    4.50
   1   2  14   98.59    4.80
  -1   2  14  104.09    4.70
  -1  -2 -14   98.09    4.50
  -1  -2 -14   97.59    4.60
   1  -3 -14  163.88    6.90
   1   3  14  164.78    7.20
   1   3  14  140.29    8.10
   1  -3 -14  163.58    6.80
  -1   3  14  169.08    7.00
  -1  -3 -14  163.08    6.70
  -1  -3 -14  157.08    6.90
   1   4  14  181.08    7.70
   1  -4 -14  177.38    7.30
   1  -4 -14  174.68    7.50
   1   4  14  163.48    8.60
  -1  -4 -14  176.78    7.40
  -1   4  14  178.68    7.60
  -1  -4 -14  177.78    7.30
   1   5  14   85.69    4.10
   1  -5 -14   91.39    3.90
   1  -5 -14   86.09    4.00
  -1   5  14   87.39    4.10
  -1  -5 -14   83.89    4.00
  -1  -5 -14   89.09    3.90
   1   6  14  107.49    4.60
   1  -6 -14  116.99    4.80
  -1   6  14  119.69    5.30
  -1  -6 -14  105.99    4.80
  -1  -6 -14  108.89    4.70
   1  -7 -14  217.68    8.20
   1   7  14  209.38    8.10
  -1   7  14  197.38    8.10
  -1  -7 -14  190.08    8.10
  -2   6 -14  141.89    5.90
   2  -5  14   12.00    1.10
  -2   5 -14   12.80    1.00
   2  -4  14  198.68    8.60
  -2   4 -14  203.38    8.40
  -2   4 -14  212.28    8.40
   2  -3  14  245.38   10.40
  -2   3 -14  256.87   10.10
  -2   3 -14  242.58   10.10
   2  -2  14   76.69    3.80
  -2   2 -14   74.09    3.50
  -2   2 -14   73.69    3.50
   2  -1  14  306.57   12.40
  -2   1 -14  299.37   12.10
  -2   1 -14  292.27   12.10
   2   0  14   44.80    2.60
   2   0 -14   41.30    2.30
  -2   0 -14   44.60    2.40
  -2   0 -14   53.79    2.60
  -2   0 -14   49.00    2.50
   2  -1 -14  311.97   12.40
   2   1  14  314.97   12.80
   2   1  14  315.67   13.80
  -2  -1 -14  309.27   12.50
  -2  -1 -14  301.77   12.40
  -2  -1 -14  298.47   12.50
   2   2  14   63.49    4.50
   2  -2 -14   73.99    3.40
   2   2  14   74.19    3.70
  -2  -2 -14   73.89    3.40
  -2   2  14   71.49    3.50
  -2  -2 -14   76.49    3.50
   2  -3 -14  256.77   10.30
   2   3  14  250.67   11.90
   2   3  14  236.38   10.70
  -2  -3 -14  265.77   10.50
  -2  -3 -14  262.27   10.30
  -2   3  14  258.77   10.60
   2   4  14  233.08    9.20
   2   4  14  187.28   10.00
   2  -4 -14  226.78    8.80
  -2  -4 -14  219.08    8.70
  -2   4  14  184.88    9.60
  -2  -4 -14  219.88    8.90
  -2   4  14  232.68    9.10
   2  -5 -14   13.90    1.10
   2   5  14   12.40    0.90
  -2   5  14   13.80    1.20
  -2  -5 -14   14.20    1.20
  -2   5  14   14.90    1.50
   2  -6 -14  138.79    5.50
   2   6  14  138.99    5.40
  -2  -6 -14  132.69    5.50
  -2   6  14  119.59    5.90
   3  -5  14   73.29    3.80
  -3   5 -14   74.99    3.20
  -3   5 -14   67.59    3.20
   3  -4  14   86.79    4.40
   3  -4  14   85.99    4.00
  -3   4 -14   79.59    3.70
  -3   4 -14   86.59    3.70
   3  -3  14   41.10    2.40
   3  -3  14   40.40    2.70
  -3   3 -14   40.30    2.10
  -3   3 -14   39.00    2.10
   3  -2  14   89.19    4.20
   3  -2  14   85.09    4.60
  -3   2 -14   82.89    3.80
  -3   2 -14   79.69    3.70
   3  -1  14  145.79    7.20
   3  -1  14  151.98    6.70
  -3   1 -14  157.58    6.40
  -3   1 -14  145.39    6.30
   3   0  14  232.98    9.40
   3   0  14  211.18   10.10
  -3   0 -14  222.18    9.00
  -3   0 -14  212.38    9.00
  -3   0 -14  223.98    9.10
   3   1  14  138.19    6.40
  -3  -1 -14  146.59    6.20
  -3  -1 -14  145.79    6.10
  -3  -1 -14  154.48    6.30
  -3   1  14  143.19    6.20
   3   2  14   80.39    4.00
  -3   2  14   79.89    3.80
  -3  -2 -14   83.69    3.80
   3  -3 -14   37.40    2.00
   3   3  14   36.20    2.30
  -3  -3 -14   43.50    2.20
  -3   3  14   43.10    2.70
   3  -4 -14   87.59    3.90
   3   4  14   88.59    3.90
  -3   4  14   97.59    4.70
  -3  -4 -14   91.49    4.10
  -3   4  14   94.39    4.30
   3  -5 -14   69.69    3.20
   3   5  14   73.99    3.20
  -3   5  14   79.59    3.90
  -3  -5 -14   72.59    3.30
   4  -4  14   21.50    1.70
  -4   4 -14   19.80    1.20
  -4   4 -14   19.20    1.10
   4  -3  14  201.98    8.70
   4  -3  14  197.78    8.90
  -4   3 -14  182.78    7.70
  -4   3 -14  189.58    7.90
   4  -2  14   36.10    2.60
   4  -2  14   38.60    2.20
  -4   2 -14   39.10    2.00
   4  -1  14   18.10    2.00
  -4   1 -14   18.60    1.20
   4   0  14   40.00    2.30
   4   0  14   33.90    2.80
  -4   0  14   42.60    2.10
  -4   0 -14   43.60    2.10
  -4   0 -14   45.60    2.10
   4   1  14   17.00    1.40
   4   1  14   13.70    1.80
  -4   1  14   18.00    1.20
  -4  -1 -14   16.50    1.10
  -4  -1 -14   17.90    1.20
   4   2  14   40.60    1.90
  -4  -2 -14   41.40    2.10
  -4   2  14   40.50    2.20
  -4   2  14   36.90    2.50
   4   3  14  197.68    7.70
  -4   3  14  175.88    8.10
  -4   3  14  199.28    8.40
  -4  -3 -14  195.58    7.90
  -4   3  14  195.08    7.80
   4   4  14   21.60    1.20
  -4   4  14   22.30    1.70
  -4  -4 -14   21.10    1.30
  -4   4  14   21.30    1.20
   5  -1  14   45.50    2.90
  -5   1 -14   57.39    2.40
   5   0  14  102.39    5.10
  -5   0 -14  100.19    4.40
  -5   0 -14  111.99    4.40
   5   1  14   54.79    2.40
  -5  -1 -14   53.69    2.50
  -5   1  14   55.19    2.80
   0   5 -15    1.50    0.40
   0   4 -15   37.40    1.90
   0   3 -15   80.59    3.60
   0   2 -15   30.10    1.70
   0   1 -15  259.17   10.50
   0   0  15    0.70    0.50
   0   0 -15    1.30    0.60
   0   0 -15    0.90    0.60
   0  -1 -15  269.27   10.60
   0  -1 -15  265.27   10.70
   0   1  15  248.68   10.70
   0   2  15   30.80    2.00
   0  -2 -15   32.90    1.90
   0  -2 -15   34.70    2.00
   0  -3 -15   81.49    3.80
   0  -3 -15   87.99    3.70
   0   3  15   85.09    3.90
   0   3  15   73.39    4.70
   0  -4 -15   39.10    2.00
   0   4  15   38.60    2.20
   0  -4 -15   39.50    2.10
   0  -5 -15    1.70    0.50
   0   5  15    0.70    0.70
   0  -5 -15    1.80    0.50
   0  -6 -15   55.19    2.50
  -1   5 -15  188.48    7.60
  -1   4 -15   32.60    1.70
   1   3 -15   72.89    3.30
  -1   3 -15   77.89    3.40
   1   2 -15    5.00    0.70
   1  -2  15    7.50    0.80
  -1   2 -15    7.10    0.90
   1   1 -15  387.36   14.80
   1  -1  15  357.36   15.00
  -1   1 -15  376.46   14.80
   1   0 -15    1.20    0.50
   1   0 -15    1.80    0.60
   1   0  15    2.10    0.70
  -1   0 -15    2.00    0.60
  -1   0 -15    0.90    0.60
   1  -1 -15  392.46   15.60
   1   1  15  375.06   15.70
   1  -1 -15  393.56   15.40
  -1  -1 -15  401.16   15.40
  -1  -1 -15  399.56   15.60
  -1   1  15  370.16   15.60
   1  -2 -15    5.60    0.80
   1  -2 -15    7.30    1.00
   1   2  15    6.70    1.00
   1   2  15    5.90    1.40
  -1   2  15    6.20    0.90
  -1  -2 -15    7.20    1.00
  -1  -2 -15    6.40    0.80
   1   3  15   80.89    3.90
   1  -3 -15   78.39    3.80
   1  -3 -15   80.19    3.60
  -1  -3 -15   81.49    3.60
  -1  -3 -15   82.19    3.70
  -1   3  15   84.09    3.90
   1  -4 -15   35.10    1.80
   1   4  15   32.00    1.90
  -1  -4 -15   33.20    1.80
  -1  -4 -15   31.00    1.70
  -1   4  15   32.70    1.90
   1  -5 -15  199.28    7.80
  -1  -5 -15  192.48    7.90
  -1  -5 -15  193.98    7.80
  -1   5  15  186.88    8.40
  -2   5 -15   28.10    1.50
  -2   4 -15   67.39    2.80
  -2   4 -15   55.99    2.70
   2  -3  15   18.20    1.30
  -2   3 -15   18.40    1.20
  -2   3 -15   19.30    1.20
   2  -2  15   40.40    2.20
  -2   2 -15   34.00    1.90
  -2   2 -15   40.20    2.00
   2  -1  15   72.39    3.40
  -2   1 -15   69.29    3.10
  -2   1 -15   63.79    3.20
   2   0  15   12.30    1.20
   2   0 -15   12.30    1.00
   2   0  15   10.70    1.60
  -2   0 -15   11.30    1.10
  -2   0 -15   12.50    1.00
   2   1  15   69.29    3.50
   2  -1 -15   67.39    3.10
  -2  -1 -15   72.09    3.30
  -2   1  15   69.69    3.30
  -2  -1 -15   71.59    3.20
   2  -2 -15   38.40    2.00
   2   2  15   38.70    2.30
  -2   2  15   39.20    2.10
  -2  -2 -15   43.10    2.20
  -2  -2 -15   37.90    2.00
   2   3  15   20.00    1.50
   2   3  15   16.10    2.00
   2  -3 -15   19.10    1.20
  -2   3  15   15.80    1.70
  -2   3  15   20.30    1.40
  -2  -3 -15   21.00    1.40
  -2  -3 -15   18.80    1.20
   2  -4 -15   63.59    2.90
  -2  -4 -15   64.99    3.00
  -2  -4 -15   61.49    2.80
  -2   4  15   60.79    3.60
  -2   4  15   70.29    3.50
   2  -5 -15   28.70    1.40
  -2   5  15   23.50    1.80
  -2  -5 -15   29.00    1.50
   3  -4  15   46.80    2.70
  -3   4 -15   43.70    2.10
  -3   4 -15   48.80    2.10
   3  -3  15  166.58    7.50
  -3   3 -15  160.28    6.80
  -3   3 -15  176.38    6.80
   3  -2  15   16.30    1.70
   3  -2  15   19.50    1.30
  -3   2 -15   20.30    1.20
  -3   2 -15   19.90    1.20
   3  -1  15  176.08    9.00
  -3   1 -15  217.08    8.10
  -3   1 -15  211.18    8.20
   3   0  15   33.80    2.00
   3   0  15   28.30    2.50
  -3   0 -15   34.00    1.70
  -3   0 -15   34.00    1.80
  -3   0 -15   33.40    1.80
   3   1  15  183.58    9.30
   3   1  15  212.78    8.50
  -3  -1 -15  213.28    8.10
  -3   1  15  171.58    8.40
  -3  -1 -15  229.08    8.30
   3   2  15   15.20    1.90
  -3   2  15   18.30    1.50
  -3  -2 -15   20.60    1.30
  -3   3  15  192.08    8.10
  -3  -3 -15  178.88    7.60
   3  -4 -15   44.40    2.20
  -3   4  15   49.80    2.70
  -3  -4 -15   49.40    2.30
   4  -1  15   93.79    5.20
  -4   1 -15  121.99    4.50
   4   0  15   14.60    1.60
   0   4 -16    0.80    0.30
   0   3 -16  109.89    4.60
   0   2 -16    5.50    0.70
   0   1 -16   36.70    1.90
   0   0 -16  476.85   17.20
   0   0  16  397.26   17.40
   0   1  16   35.00    2.00
   0  -1 -16   36.00    1.90
   0  -1 -16   37.40    1.90
   0   2  16    4.80    0.80
   0  -2 -16    5.20    0.60
   0  -2 -16    5.00    0.70
   0  -3 -16  115.69    4.70
   0  -3 -16  110.79    4.80
   0  -4 -16    0.50    0.40
   0   4  16    0.30    0.60
   0  -4 -16    0.90    0.40
  -1   3 -16   76.89    3.30
   1   2 -16   31.70    1.60
  -1   2 -16   35.90    1.70
   1   1 -16   18.80    1.20
  -1   1 -16   21.60    1.30
   1   0  16   90.79    4.20
   1   0 -16   92.29    3.90
  -1   0 -16   93.59    4.00
   1   1  16   19.90    1.40
   1  -1 -16   18.50    1.20
  -1  -1 -16   20.40    1.20
  -1  -1 -16   20.90    1.30
   1  -2 -16   33.80    1.70
   1   2  16   26.80    2.40
  -1  -2 -16   33.30    1.80
  -1  -2 -16   34.20    1.70
   1  -3 -16   79.89    3.40
  -1  -3 -16   80.79    3.40
  -1  -3 -16   77.99    3.50
   2  -2  16   15.00    1.50
   2  -1  16   93.39    4.80
   2   0  16    0.40    0.70
  -2   0 -16    0.80    0.40
   2  -1 -16  156.48    6.60
  -2  -1 -16  166.68    6.60
  -2  -1 -16  165.68    6.70
   2  -2 -16   27.70    1.30
   2   2  16   20.40    2.10
  -2  -2 -16   28.30    1.50
  -2  -2 -16   26.90    1.30
  -2   2  16   23.80    1.80
   2  -3 -16    6.90    0.70
  -2  -3 -16    5.90    0.70

_computing_structure_solution     'SHELXT 2014/4 (Sheldrick, 2014)'
;
_shelx_hkl_checksum   56598
