# Supplementary material for: Catalytic diastereo- and enantioselective additions of versatile allyl groups to N–H ketimines
Source: Springer Nature journal article supplement (doi:10.1038/nchem.2816), 2017-07-17
Supplement: 41557_2017_BFnchem2816_MOESM93_ESM.mol [file 41557_2017_BFnchem2816_MOESM93_ESM.mol]

nchem.2816-comp9b.mol
  ChemDraw06231712152D

 16 16  0  0  1  0  0  0  0  0999 V2000
   -0.7145    0.0000    0.0000 C   0  0  0  0  0  0  0  0  0  0  0  0
    0.0000    0.4125    0.0000 C   0  0  0  0  0  0  0  0  0  0  0  0
    0.7145    0.0000    0.0000 C   0  0  0  0  0  0  0  0  0  0  0  0
    0.7145   -0.8250    0.0000 C   0  0  0  0  0  0  0  0  0  0  0  0
    1.4289    0.4125    0.0000 C   0  0  0  0  0  0  0  0  0  0  0  0
    1.4289    1.2375    0.0000 O   0  0  0  0  0  0  0  0  0  0  0  0
   -0.4125    1.1270    0.0000 N   0  0  0  0  0  0  0  0  0  0  0  0
    1.4289   -1.2375    0.0000 C   0  0  0  0  0  0  0  0  0  0  0  0
    2.1434   -0.8250    0.0000 O   0  0  0  0  0  0  0  0  0  0  0  0
   -1.4289    0.4125    0.0000 C   0  0  0  0  0  0  0  0  0  0  0  0
   -2.1434    0.0000    0.0000 C   0  0  0  0  0  0  0  0  0  0  0  0
   -2.1434   -0.8250    0.0000 C   0  0  0  0  0  0  0  0  0  0  0  0
   -1.4289   -1.2375    0.0000 C   0  0  0  0  0  0  0  0  0  0  0  0
   -0.7145   -0.8250    0.0000 C   0  0  0  0  0  0  0  0  0  0  0  0
    0.4125    1.1270    0.0000 C   0  0  0  0  0  0  0  0  0  0  0  0
    2.1434    0.0000    0.0000 C   0  0  0  0  0  0  0  0  0  0  0  0
  2 15  1  1      
  5 16  1  0      
  1  2  1  0      
  2  3  1  0      
  3  4  1  6      
  3  5  1  0      
  5  6  2  0      
  2  7  1  6      
  4  8  1  0      
  8  9  1  0      
  1 10  2  0      
 10 11  1  0      
 11 12  2  0      
 12 13  1  0      
 13 14  2  0      
 14  1  1  0      
M  STY  1   1 SUP
M  SLB  1   1   1
M  SAL   1  1  15
M  SBL   1  1   1
M  SMT   1 Me
M  SBV   1   1   -0.4125   -0.7145
M  STY  1   2 SUP
M  SLB  1   2   2
M  SAL   2  1  16
M  SBL   2  1   2
M  SMT   2 Me
M  SBV   2   2   -0.7145    0.4125
M  END
